# Supplementary material for: Nucleoporin107 mediates female sexual differentiation via Dsx
Source: eLife. 2022 Mar 21;11:e72632. doi: 10.7554/eLife.72632 (PMC8975549; doi:10.7554/eLife.72632)
Supplement: Supplementary file 1. [file elife-72632-supp1.xls]

## Sheet: Table S1
General_Gene_Details					Raw_Counts_per_Sample							Normalized_Counts_per_Sample							Mean_Normalized_Counts	Larva: WT / YW					Larva: Mut / YW					Larva: Mut / WT					Significant			Final Filtering Threshold
Ensembl_Gene_ID	Associated_Gene_Name	Description	Gene_type	Chromosome_Name	YW_L_G	WT7_L_G	WT9A_L_G	WTG912_L_G	Mut6_L_G	Mut9A_L_G	Mut15_L_G	YW_L_G	WT7_L_G	WT9A_L_G	WTG912_L_G	Mut6_L_G	Mut9A_L_G	Mut15_L_G	baseMean	log2FoldChange	lfcSE	stat	pvalue	padj	log2FoldChange	lfcSE	stat	pvalue	padj	log2FoldChange	lfcSE	stat	pvalue	padj	Larva: WT / YW	Larva: Mut / YW	Larva: Mut / WT	mut/yw vs wt/yw
FBgn0000003	7SLRNA:CR32864	Signal_recognition_particle_7SL_RNA_CR32864	lincRNA	3R	0	0	0	0	0	0	0	?	?	?	?	?	?	?	?	?	?	?	?	?	?	?	?	?	?	?	?	?	?	?	no	no	no	#VALUE!
FBgn0000008	a	arc	protein_coding	2R	95	129	218	116	90	127	109	94.9422	117.709	196.766	109.199	103.892	127.89	112.916	123.331	0.35317	0.381813	0.92498	0.354976	1	0.125677	0.382136	0.328881	0.742246	0.999669	-0.227493	0.340699	-0.667722	0.504311	1	no	no	no	0
FBgn0000014	abd-A	abdominal_A	protein_coding	3R	17212	14777	14284	16480	11463	12496	11148	17201.5	13483.6	12892.7	15513.8	13232.3	12583.6	11548.5	13779.5	-0.282793	0.165493	-1.70879	0.0874895	1	-0.443907	0.165528	-2.68176	0.00732349	0.27195	-0.161114	0.120246	-1.33986	0.180289	1	no	no	no	0
FBgn0000015	Abd-B	Abdominal_B	protein_coding	3R	877	904	501	766	602	668	552	876.467	824.877	452.2	721.092	694.92	672.682	571.833	687.725	-0.313168	0.305063	-1.02657	0.304623	1	-0.351788	0.305209	-1.15261	0.249069	0.995992	-0.0386203	0.2409	-0.160317	0.872632	1	no	no	no	0
FBgn0000017	Abl	Abl_tyrosine_kinase	protein_coding	3L	3168	3002	3012	2728	2247	2369	2184	3166.07	2739.25	2718.62	2568.07	2593.83	2385.6	2262.47	2633.42	-0.22615	0.17564	-1.28758	0.197893	1	-0.370648	0.1758	-2.10835	0.0350008	0.613557	-0.144497	0.128316	-1.1261	0.260121	1	no	no	no	0
FBgn0000018	abo	abnormal_oocyte	protein_coding	2L	201	282	402	300	205	321	274	200.878	257.318	362.843	282.412	236.642	323.25	283.845	278.17	0.433098	0.33223	1.30361	0.192367	1	0.348625	0.332521	1.04843	0.29444	0.999669	-0.0844725	0.268851	-0.314198	0.75337	1	no	no	no	0
FBgn0000022	ac	achaete	protein_coding	X	0	0	8	8	0	0	0	0	0	7.22076	7.53099	0	0	0	2.10739	0.104857	0.122772	0.854072	0.393065	1	0	0.12252	0	1	NA	-0.146622	0.160067	-0.916001	0.359666	NA	no	no	no	0
FBgn0000024	Ace	Acetylcholine_esterase	protein_coding	3R	97	285	102	1848	266	172	139	96.941	260.055	92.0647	1739.66	307.058	173.206	143.994	401.854	0.545872	0.323023	1.68989	0.0910495	1	-0.0543703	0.322976	-0.168342	0.866314	0.999669	-0.600243	0.375777	-1.59734	0.11019	1	no	no	no	0
FBgn0000028	acj6	abnormal_chemosensory_jump_6	protein_coding	X	41	108	25	34	93	13	49	40.9751	98.5473	22.5649	32.0067	107.355	13.0911	50.7606	52.1858	0.0576393	0.35807	0.160972	0.872115	1	0.127792	0.358008	0.356953	0.721127	0.999669	0.0701527	0.395805	0.177241	0.859319	1	no	no	no	0
FBgn0000032	Acph-1	Acid_phosphatase_1	protein_coding	3R	543	372	443	444	385	386	481	542.67	339.441	399.85	417.97	444.426	388.706	498.282	433.049	-0.413556	0.289323	-1.42939	0.152891	1	-0.22913	0.289354	-0.791867	0.428438	0.999669	0.184426	0.225541	0.817705	0.413526	1	no	no	no	0
FBgn0000036	nAChRalpha1	nicotinic_Acetylcholine_Receptor_alpha1	protein_coding	3R	34	40	51	15	29	27	13	33.9793	36.499	46.0323	14.1206	33.4762	27.1892	13.4671	29.252	0.0143694	0.362005	0.0396938	0.968337	1	-0.155223	0.361708	-0.429141	0.667821	0.999669	-0.169593	0.397015	-0.427169	0.669256	1	no	no	no	0
FBgn0000037	mAChR-A	muscarinic_Acetylcholine_Receptor,_A-type	protein_coding	2R	5	29	16	0	8	0	38	4.99696	26.4618	14.4415	0	9.23482	0	39.3653	13.5001	0.0564126	0.225568	0.250091	0.802517	1	0.0961896	0.22546	0.426638	0.669643	NA	0.039777	0.283445	0.140334	0.888396	NA	no	no	no	0
FBgn0000038	nAChRbeta1	nicotinic_Acetylcholine_Receptor_beta1	protein_coding	3L	17	20	0	14	0	10	1	16.9897	18.2495	0	13.1792	0	10.0701	1.03593	8.50349	-0.02133	0.210254	-0.101449	0.919194	1	-0.174768	0.209946	-0.832445	0.405158	NA	-0.153438	0.265885	-0.577085	0.563882	NA	no	no	no	0
FBgn0000039	nAChRalpha2	nicotinic_Acetylcholine_Receptor_alpha2	protein_coding	3R	0	0	0	1	0	27	2	0	0	0	0.941374	0	27.1892	2.07186	4.31464	-0.0585128	0.152005	-0.38494	0.700282	1	0.158651	0.152007	1.04371	0.296621	NA	0.217164	0.196858	1.10315	0.269962	NA	no	no	no	0
FBgn0000042	Act5C	Actin_5C	protein_coding	X	167592	159018	170845	137205	131783	162188	153065	167490	145100	154204	129161	152124	163325	158565	152853	-0.221872	0.149278	-1.4863	0.137201	1	-0.078831	0.149279	-0.528079	0.597444	0.999669	0.143041	0.107836	1.32646	0.184687	1	no	no	no	0
FBgn0000043	Act42A	Actin_42A	protein_coding	2R	15424	17878	18737	12336	18071	18650	15338	15414.6	16313.2	16911.9	11612.8	20860.3	18780.7	15889.1	16540.4	-0.0483281	0.21827	-0.221415	0.82477	1	0.246937	0.218266	1.13136	0.257904	0.999669	0.295265	0.161987	1.82277	0.068338	1	no	no	no	0
	Act57B	Actin_57B	protein_coding	2R	3732	1432	594	693	2091	5056	7894	3729.73	1306.66	536.141	652.372	2413.75	5091.44	8177.63	3129.68	-1.1281	0.39188	-2.87868	0.00399339	0.357355	0.471416	0.391876	1.20297	0.228987	0.985726	1.59951	0.386669	4.13665	3.52418e-05	0.0280348	no	no	yes	0
FBgn0000045	Act79B	Actin_79B	protein_coding	3L	26	26	25	25	9	28	72	25.9842	23.7243	22.5649	23.5343	10.3892	28.1963	74.5869	29.8543	-0.0998047	0.352884	-0.282826	0.777311	1	0.192959	0.352946	0.546712	0.584577	0.999669	0.292764	0.393713	0.743599	0.457119	1	no	no	no	0
FBgn0000046	Act87E	Actin_87E	protein_coding	3R	1711	2191	772	1473	1877	1281	3366	1709.96	1999.23	696.803	1386.64	2166.72	1289.98	3486.94	1819.47	-0.228625	0.392736	-0.582134	0.560477	1	0.283312	0.392732	0.721387	0.470671	0.999669	0.511937	0.376016	1.36148	0.173363	1	no	no	no	0
FBgn0000047	Act88F	Actin_88F	protein_coding	3R	4	0	0	2	1	0	1	3.99757	0	0	1.88275	1.15435	0	1.03593	1.15294	-0.0755691	0.120821	-0.625461	0.531668	1	-0.0699179	0.120573	-0.579879	0.561996	NA	0.00565116	0.157429	0.0358966	0.971365	NA	no	no	no	0
FBgn0000052	ade2	adenosine_2	protein_coding	2L	514	901	752	1343	711	807	570	513.687	822.14	678.751	1264.26	820.744	812.656	590.48	786.103	0.669056	0.313312	2.13543	0.0327257	1	0.388337	0.313526	1.23861	0.21549	0.973953	-0.280719	0.248452	-1.12987	0.25853	1	no	no	no	0
FBgn0000053	ade3	adenosine_3	protein_coding	2L	398	255	266	771	325	155	162	397.758	232.681	240.09	725.799	375.164	156.086	167.821	327.914	0.0765642	0.390058	0.196289	0.844384	1	-0.473419	0.390183	-1.21333	0.225005	0.982704	-0.549983	0.361897	-1.51972	0.128581	1	no	no	no	0
FBgn0000054	Adf1	Adh_transcription_factor_1	protein_coding	2R	1141	1183	1207	1063	814	1174	1128	1140.31	1079.46	1089.43	1000.68	939.643	1182.23	1168.53	1085.75	-0.100017	0.229018	-0.436721	0.662314	1	-0.0483322	0.229131	-0.210937	0.832937	0.999669	0.0516849	0.171066	0.302135	0.762549	1	no	no	no	0
FBgn0000055	Adh	Alcohol_dehydrogenase	protein_coding	2L	0	0	0	0	0	0	0	?	?	?	?	?	?	?	?	?	?	?	?	?	?	?	?	?	?	?	?	?	?	?	no	no	no	#VALUE!
FBgn0000056	Adhr	Adh-related	protein_coding	2L	0	0	0	0	0	0	0	?	?	?	?	?	?	?	?	?	?	?	?	?	?	?	?	?	?	?	?	?	?	?	no	no	no	#VALUE!
FBgn0000057	adp	adipose	protein_coding	2R	160	118	93	208	97	137	97	159.903	107.672	83.9413	195.806	111.972	137.96	100.485	128.248	-0.15757	0.38712	-0.407031	0.683985	1	-0.262507	0.387291	-0.677803	0.497897	0.999669	-0.104937	0.353336	-0.296989	0.766475	1	no	no	no	0
FBgn0000061	al	aristaless	protein_coding	2L	42	136	575	48	6	48	14	41.9745	124.097	518.992	45.1859	6.92611	48.3364	14.503	114.288	0.970393	0.364204	2.66442	0.00771211	0.529317	-0.480646	0.363741	-1.3214	0.186369	0.950765	-1.45104	0.397683	-3.64873	0.000263542	0.0995924	no	no	yes	0
FBgn0000063	ald	altered_disjunction	protein_coding	3R	1101	1235	1263	1240	829	1112	981	1100.33	1126.91	1139.98	1167.3	956.958	1119.79	1016.25	1089.65	0.0556432	0.213584	0.260521	0.794462	1	-0.0888681	0.213863	-0.415537	0.677748	0.999669	-0.144511	0.158297	-0.912912	0.361289	1	no	no	no	0
FBgn0000064	Ald	Aldolase	protein_coding	3R	4952	5763	4921	7050	8999	4418	5643	4948.99	5258.59	4441.67	6636.68	10388	4448.97	5845.75	5995.52	0.0911162	0.303115	0.300599	0.76372	1	0.397844	0.303109	1.31254	0.189337	0.956667	0.306728	0.238422	1.28649	0.198272	1	no	no	no	0
FBgn0000071	Ama	Amalgam	protein_coding	3R	8115	9243	8396	6429	6264	8886	8849	8110.06	8434.01	7578.19	6052.09	7230.86	8948.28	9166.94	7931.49	-0.133531	0.209632	-0.636979	0.524138	1	0.0587125	0.209634	0.280071	0.779423	0.999669	0.192244	0.154949	1.24069	0.214721	1	no	no	no	0
FBgn0000075	amd	alpha_methyl_dopa-resistant	protein_coding	2L	1	12	18	1	13	7	12	0.999392	10.9497	16.2467	0.941374	15.0066	7.04906	12.4312	9.08914	0.143536	0.271916	0.527869	0.59759	1	0.214989	0.271695	0.79129	0.428775	NA	0.0714531	0.332236	0.215067	0.829715	NA	no	no	no	0
FBgn0000077	amx	almondex	protein_coding	X	32	11	34	9	4	23	10	31.9805	10.0372	30.6882	8.47236	4.61741	23.1612	10.3593	17.0452	-0.175041	0.318981	-0.548752	0.583176	1	-0.281335	0.318578	-0.883096	0.377184	0.999669	-0.106294	0.372251	-0.285543	0.775228	NA	no	no	no	0
FBgn0000078	Amy-d	Amylase_distal	protein_coding	2R	0	0	0	0	3	0	0	0	0	0	0	3.46306	0	0	0.494722	0	0.115139	0	1	NA	0.080149	0.115139	0.696103	0.486364	NA	0.114218	0.150485	0.758998	0.447854	NA	no	no	no	0
FBgn0000079	Amy-p	Amylase_proximal	protein_coding	2R	0	0	0	0	0	0	0	?	?	?	?	?	?	?	?	?	?	?	?	?	?	?	?	?	?	?	?	?	?	?	no	no	no	#VALUE!
FBgn0000083	AnxB9	Annexin_B9	protein_coding	3R	1828	1921	1450	1410	1835	1801	1473	1826.89	1752.86	1308.76	1327.34	2118.24	1813.62	1525.92	1667.66	-0.291093	0.246606	-1.1804	0.237842	1	0.00500646	0.246573	0.0203042	0.983801	0.999822	0.2961	0.186003	1.59191	0.111405	1	no	no	no	0
FBgn0000084	AnxB10	Annexin_B10	protein_coding	X	33	48	37	11	24	12	0	32.9799	43.7988	33.396	10.3551	27.7045	12.0841	0	22.9026	0.0374124	0.294414	0.127074	0.898882	1	-0.243032	0.294024	-0.826572	0.40848	0.999669	-0.280445	0.352389	-0.795839	0.426125	1	no	no	no	0
FBgn0000092	CG2650	?	protein_coding	X	0	6	0	0	0	11	0	0	5.47485	0	0	0	11.0771	0	2.36456	0.00769194	0.123103	0.0624839	0.950178	1	0.055841	0.123003	0.453982	0.649842	NA	0.0481491	0.160586	0.299834	0.764304	NA	no	no	no	0
FBgn0000094	Anp	Andropin	protein_coding	3R	0	0	0	0	0	0	0	?	?	?	?	?	?	?	?	?	?	?	?	?	?	?	?	?	?	?	?	?	?	?	no	no	no	#VALUE!
FBgn0000097	aop	anterior_open	protein_coding	2L	4889	4829	5268	4517	3794	3907	3888	4886.03	4406.34	4754.87	4252.19	4379.61	3934.38	4027.69	4377.3	-0.119698	0.16405	-0.729648	0.465605	1	-0.237198	0.164146	-1.44505	0.148445	0.932181	-0.1175	0.119202	-0.985721	0.32427	1	no	no	no	0
FBgn0000099	ap	apterous	protein_coding	2R	59	407	487	458	607	292	451	58.9641	371.377	439.564	431.149	700.692	294.047	467.204	394.714	1.70699	0.353429	4.8298	1.36671e-06	0.000476558	1.90647	0.353436	5.39409	6.88706e-08	3.5029e-05	0.199476	0.291605	0.684062	0.493936	1	yes	yes	no	1
FBgn0000100	RpLP0	Ribosomal_protein_LP0	protein_coding	3L	32788	37089	41572	38154	34193	39150	40785	32768.1	33842.8	37522.7	35917.2	39470.8	39424.4	42250.4	37313.8	0.119718	0.138553	0.864061	0.387554	1	0.292267	0.138554	2.1094	0.0349099	0.613557	0.172549	0.0997577	1.72968	0.0836877	1	no	no	no	0
FBgn0000108	Appl	beta_amyloid_protein_precursor-like	protein_coding	X	28	45	106	177	59	56	116	27.983	41.0614	95.6751	166.623	68.1068	56.3925	120.168	82.2871	0.629563	0.388936	1.61868	0.105516	1	0.439147	0.388919	1.12915	0.258835	0.999669	-0.190416	0.392231	-0.485469	0.627343	1	no	no	no	0
FBgn0000109	Aprt	Adenine_phosphoribosyltransferase	protein_coding	3L	65	23	21	39	65	57	47	64.9605	20.9869	18.9545	36.7136	75.0329	57.3995	48.6887	46.1052	-0.631205	0.3886	-1.6243	0.104311	1	0.0714904	0.388665	0.183938	0.854062	0.999669	0.702695	0.393796	1.78441	0.0743563	1	no	no	no	0
FBgn0000114	aret	arrest	protein_coding	2L	1302	925	1576	1446	1133	1270	1339	1301.21	844.039	1422.49	1361.23	1307.88	1278.9	1387.11	1271.84	-0.0946831	0.271724	-0.348453	0.7275	1	0.0271519	0.271762	0.0999106	0.920415	0.999669	0.121835	0.208332	0.584813	0.558674	1	no	no	no	0
FBgn0000115	Arl1	ADP_ribosylation_factor-like_1	protein_coding	3L	204	286	176	161	93	278	134	203.876	260.968	158.857	151.561	107.355	279.949	138.815	185.911	-0.0432869	0.38616	-0.112096	0.910747	1	-0.130344	0.386277	-0.337435	0.735789	0.999669	-0.0870567	0.350695	-0.248241	0.803948	1	no	no	no	0
FBgn0000116	Argk	Arginine_kinase	protein_coding	3L	13232	12536	13508	13995	9208	16969	10022	13224	11438.8	12192.3	13174.5	10629.3	17087.9	10382.1	12589.8	-0.0971716	0.239437	-0.405834	0.684865	1	-0.0499582	0.239446	-0.208641	0.834729	0.999669	0.0472134	0.179751	0.26266	0.792812	1	no	no	no	0
FBgn0000117	arm	armadillo	protein_coding	X	11402	13627	12062	12716	8309	11373	12017	11395.1	12434.3	10887.1	11970.5	9591.51	11452.7	12448.8	11454.3	0.0443999	0.179762	0.246993	0.804914	1	-0.0289228	0.17979	-0.16087	0.872196	0.999669	-0.0733227	0.131208	-0.558827	0.576279	1	no	no	no	0
FBgn0000119	arr	arrow	protein_coding	2R	367	312	375	191	219	259	215	366.777	284.692	338.473	179.802	252.803	260.815	222.725	272.298	-0.314588	0.347153	-0.906194	0.364833	1	-0.420067	0.347428	-1.20908	0.226634	0.98459	-0.105479	0.288466	-0.365654	0.714623	1	no	no	no	0
FBgn0000120	Arr1	Arrestin_1	protein_coding	2L	0	0	0	0	0	0	0	?	?	?	?	?	?	?	?	?	?	?	?	?	?	?	?	?	?	?	?	?	?	?	no	no	no	#VALUE!
FBgn0000121	Arr2	Arrestin_2	protein_coding	3L	0	0	0	0	0	0	0	?	?	?	?	?	?	?	?	?	?	?	?	?	?	?	?	?	?	?	?	?	?	?	no	no	no	#VALUE!
FBgn0000137	ase	asense	protein_coding	X	1	6	52	8	0	1	44	0.999392	5.47485	46.9349	7.53099	0	1.00701	45.5809	15.3612	0.169151	0.239389	0.706595	0.479818	1	0.100585	0.239205	0.420497	0.674122	0.999669	-0.0685661	0.29854	-0.229671	0.818347	NA	no	no	no	0
FBgn0000139	ash2	absent,_small,_or_homeotic_discs_2	protein_coding	3R	394	657	384	558	432	468	628	393.76	599.496	346.597	525.287	498.68	471.28	650.564	497.952	0.231841	0.320458	0.723467	0.469393	1	0.355158	0.320516	1.10808	0.267826	0.999669	0.123317	0.256126	0.48147	0.630182	1	no	no	no	0
FBgn0000140	asp	abnormal_spindle	protein_coding	3R	1268	1261	1499	1284	1087	1134	1123	1267.23	1150.63	1352.99	1208.72	1254.78	1141.95	1163.35	1219.95	-0.0297433	0.212098	-0.140234	0.888475	1	-0.0879086	0.21229	-0.414097	0.678803	0.999669	-0.0581653	0.157104	-0.370235	0.711208	1	no	no	no	0
FBgn0000146	aub	aubergine	protein_coding	2L	198	320	261	347	256	206	158	197.88	291.992	235.577	326.657	295.514	207.444	163.677	245.534	0.384482	0.353971	1.0862	0.277392	1	0.0843292	0.354383	0.23796	0.811912	0.999669	-0.300152	0.296296	-1.01301	0.311053	1	no	no	no	0
FBgn0000147	aurA	aurora_A	protein_coding	3R	259	335	288	278	233	224	385	258.842	305.679	259.947	261.702	268.964	225.57	398.833	282.791	0.0571902	0.34284	0.166813	0.867517	1	0.151884	0.34294	0.442886	0.657848	0.999669	0.0946933	0.282114	0.335656	0.73713	1	no	no	no	0
FBgn0000150	awd	abnormal_wing_discs	protein_coding	3R	13192	14362	14453	13377	10947	13752	15305	13184	13105	13045.2	12592.8	12636.7	13848.4	15854.9	13466.7	-0.0301221	0.164647	-0.18295	0.854838	1	0.0950631	0.164655	0.577346	0.563706	0.999669	0.125185	0.119514	1.04745	0.29489	1	no	no	no	0
FBgn0000152	Axs	Abnormal_X_segregation	protein_coding	X	127	113	103	170	90	75	88	126.923	103.11	92.9673	160.034	103.892	75.5257	91.1618	107.659	-0.0188236	0.384994	-0.0488932	0.961004	1	-0.312668	0.385368	-0.811349	0.417166	0.999669	-0.293844	0.348376	-0.843467	0.398967	1	no	no	no	0
FBgn0000153	b	black	protein_coding	2L	0	0	9	0	0	7	14	0	0	8.12336	0	0	7.04906	14.503	4.23935	7.02836e-05	0.145639	0.000482589	0.999615	1	0.0911004	0.14557	0.62582	0.531433	NA	0.0910301	0.188908	0.481875	0.629895	NA	no	no	no	0
FBgn0000157	Dll	Distal-less	protein_coding	2R	14	36	579	24	0	20	0	13.9915	32.8491	522.603	22.593	0	20.1402	0	87.4538	0.236418	0.188937	1.25131	NA	NA	-0.10336	0.188901	-0.547166	NA	NA	-0.339778	0.241428	-1.40737	NA	NA	no	no	no	0
FBgn0000158	bam	bag_of_marbles	protein_coding	3R	54	0	5	16	68	0	0	53.9672	0	4.51298	15.062	78.496	0	0	21.7197	-0.241704	0.212415	-1.13788	NA	NA	-0.0565223	0.212405	-0.266106	NA	NA	0.185182	0.268572	0.689506	NA	NA	no	no	no	0
FBgn0000163	baz	bazooka	protein_coding	X	670	635	545	496	469	532	632	669.592	579.422	491.914	466.921	541.391	535.729	654.708	562.811	-0.33228	0.271913	-1.22201	0.221704	1	-0.173913	0.271966	-0.639464	0.522521	0.999669	0.158367	0.208968	0.757854	0.448538	1	no	no	no	0
FBgn0000166	bcd	bicoid	protein_coding	3R	56	141	129	102	146	97	89	55.9659	128.659	116.435	96.0201	168.535	97.6799	92.1977	107.928	0.511706	0.386719	1.3232	0.185769	1	0.56353	0.386818	1.45683	0.145163	0.924298	0.0518231	0.351296	0.14752	0.882722	1	no	no	no	0
FBgn0000173	ben	bendless	protein_coding	X	1740	1741	1659	1925	1472	1317	1418	1738.94	1588.62	1497.41	1812.14	1699.21	1326.23	1468.95	1590.21	-0.0788536	0.220936	-0.356907	0.721162	1	-0.197665	0.221106	-0.893982	0.371331	0.999669	-0.118811	0.164413	-0.722637	0.469903	1	no	no	no	0
FBgn0000179	bi	bifid	protein_coding	X	14	36	244	54	6	21	19	13.9915	32.8491	220.233	50.8342	6.92611	21.1472	19.6827	52.2377	0.929946	0.361334	2.57365	0.0100632	0.618164	-0.261446	0.360553	-0.725124	0.468376	0.999669	-1.19139	0.396877	-3.00191	0.00268289	0.54214	no	no	no	0
FBgn0000180	bib	big_brain	protein_coding	2L	1177	645	1090	494	469	552	496	1176.28	588.546	983.829	465.039	541.391	555.869	513.821	689.254	-0.593207	0.321457	-1.84537	0.0649835	1	-0.890629	0.321722	-2.76832	0.00563467	0.231379	-0.297422	0.258527	-1.15045	0.24996	1	no	no	no	0
FBgn0000181	bic	bicaudal	protein_coding	2R	13995	17257	15851	16162	11799	14225	15240	13986.5	15746.6	14307	15214.5	13620.2	14324.7	15787.6	14712.4	0.105261	0.152578	0.689886	0.490266	1	0.0564683	0.152602	0.370036	0.711356	0.999669	-0.0487931	0.110318	-0.442293	0.658277	1	no	no	no	0
FBgn0000182	BicC	Bicaudal_C	protein_coding	2L	0	0	0	0	0	0	0	?	?	?	?	?	?	?	?	?	?	?	?	?	?	?	?	?	?	?	?	?	?	?	no	no	no	#VALUE!
FBgn0000183	BicD	Bicaudal_D	protein_coding	2L	303	273	399	362	283	318	181	302.816	249.106	360.135	340.777	326.682	320.229	187.503	298.178	0.058821	0.348191	0.168933	0.865849	1	-0.0995368	0.348467	-0.285642	0.775152	0.999669	-0.158358	0.289173	-0.547624	0.58395	1	no	no	no	0
FBgn0000206	boss	bride_of_sevenless	protein_coding	3R	0	0	0	0	0	0	0	?	?	?	?	?	?	?	?	?	?	?	?	?	?	?	?	?	?	?	?	?	?	?	no	no	no	#VALUE!
FBgn0000210	br	broad	protein_coding	X	40059	26322	34865	26633	22107	25123	19176	40034.6	24018.2	31469	25071.6	25519.3	25299.1	19865	27325.2	-0.527952	0.199125	-2.65136	0.00801681	0.536861	-0.710015	0.19914	-3.56541	0.000363286	0.0356894	-0.182063	0.146527	-1.24252	0.214046	1	no	yes	no	1
FBgn0000212	brm	brahma	protein_coding	3L	3127	2931	3067	3321	2591	2426	2330	3125.1	2674.46	2768.26	3126.3	2990.93	2443	2413.72	2791.68	-0.116941	0.199588	-0.585911	0.557935	1	-0.239506	0.199704	-1.19931	0.230408	0.985812	-0.122566	0.14702	-0.833665	0.40447	1	no	no	no	0
FBgn0000216	Brd	Bearded	protein_coding	3L	14	100	180	23	0	19	38	13.9915	91.2475	162.467	21.6516	0	19.1332	39.3653	49.6937	0.582283	0.320371	1.81752	0.0691369	1	-0.148033	0.319916	-0.462724	0.643563	0.999669	-0.730315	0.373793	-1.95379	0.0507255	1	no	no	no	0
FBgn0000221	brn	brainiac	protein_coding	X	18	10	16	13	3	0	24	17.9891	9.12475	14.4415	12.2379	3.46306	0	24.8623	11.7312	-0.0519407	0.257824	-0.201458	0.84034	1	-0.113687	0.257532	-0.441449	0.658888	NA	-0.0617465	0.317487	-0.194485	0.845796	NA	no	no	no	0
FBgn0000227	Bsg25A	Blastoderm-specific_gene_25A	protein_coding	2L	0	0	0	0	0	0	0	?	?	?	?	?	?	?	?	?	?	?	?	?	?	?	?	?	?	?	?	?	?	?	no	no	no	#VALUE!
FBgn0000228	Bsg25D	Blastoderm-specific_gene_25D	protein_coding	2L	429	389	435	415	356	302	259	428.739	354.953	392.629	390.67	410.949	304.117	268.306	364.338	-0.125992	0.313175	-0.402306	0.687459	1	-0.314333	0.313575	-1.00242	0.316141	0.999669	-0.188341	0.249502	-0.754868	0.450328	1	no	no	no	0
FBgn0000229	bsk	basket	protein_coding	2L	786	877	871	739	679	580	734	785.522	800.241	786.16	695.675	783.805	584.065	760.372	742.263	-0.0359807	0.260262	-0.138248	0.890044	1	-0.130392	0.260506	-0.500534	0.616699	0.999669	-0.0944111	0.19816	-0.476439	0.633761	1	no	no	no	0
FBgn0000233	btd	buttonhead	protein_coding	X	14	32	146	1	1	0	1	13.9915	29.1992	131.779	0.941374	1.15435	0	1.03593	25.443	0.500069	0.280739	1.78126	0.0748696	1	-0.381923	0.27987	-1.36465	0.172364	0.949948	-0.881993	0.339795	-2.59566	0.00944095	0.982017	no	no	no	0
FBgn0000239	bur	burgundy	protein_coding	2L	391	397	389	430	445	448	450	390.762	362.253	351.109	404.791	513.687	451.14	466.168	419.987	-0.072608	0.280143	-0.259182	0.795495	1	0.254961	0.280011	0.910541	0.362537	0.999669	0.327569	0.215768	1.51815	0.128975	1	no	no	no	0
FBgn0000241	bw	brown	protein_coding	2R	47	0	24	71	22	91	23	46.9714	0	21.6623	66.8375	25.3957	91.6378	23.8264	39.4759	-0.140191	0.302105	-0.464046	0.642614	1	0.0441284	0.302091	0.146077	0.883861	0.999669	0.184319	0.359302	0.512993	0.607956	1	no	no	no	0
FBgn0000244	by	blistery	protein_coding	3R	352	254	176	239	321	234	168	351.786	231.769	158.857	224.988	370.547	235.64	174.036	249.66	-0.538341	0.365267	-1.47383	0.140527	1	-0.26309	0.365226	-0.72035	0.47131	0.999669	0.275251	0.312866	0.879772	0.378983	1	no	no	no	0
FBgn0000246	c(3)G	crossover_suppressor_on_3_of_Gowen	protein_coding	3R	285	369	311	249	401	305	346	284.827	336.703	280.707	234.402	462.895	307.138	358.432	323.586	-0.0296126	0.330219	-0.0896757	0.928545	1	0.323683	0.330095	0.980576	0.326802	0.999669	0.353296	0.267007	1.32317	0.185778	1	no	no	no	0
FBgn0000247	ca	claret	protein_coding	3R	809	770	819	829	731	852	597	808.508	702.606	739.225	780.399	843.831	857.972	618.45	764.427	-0.110581	0.262345	-0.421511	0.673382	1	-0.052595	0.262462	-0.200391	0.841175	0.999669	0.0579864	0.199949	0.290005	0.771812	1	no	no	no	0
FBgn0000250	cact	cactus	protein_coding	2L	1422	1588	1490	1605	1310	1455	1378	1421.14	1449.01	1344.87	1510.9	1512.2	1465.2	1427.51	1447.26	0.0121585	0.19574	0.0621155	0.950471	1	0.0441896	0.195862	0.225616	0.8215	0.999669	0.0320311	0.143771	0.222793	0.823697	1	no	no	no	0
FBgn0000251	cad	caudal	protein_coding	2L	7	37	26	33	144	0	26	6.99574	33.7616	23.4675	31.0653	166.227	0	26.9342	41.2073	0.0484679	0.296287	0.163584	0.870059	1	0.375585	0.296337	1.26742	0.205004	0.973953	0.327117	0.354535	0.922664	0.356182	1	no	no	no	0
FBgn0000253	Cam	Calmodulin	protein_coding	2R	17928	18705	17816	15130	16588	13790	17983	17917.1	17067.8	16080.6	14243	19148.4	13886.7	18629.1	16710.4	-0.170283	0.198681	-0.857066	0.391408	1	-0.0501071	0.198687	-0.252192	0.800893	0.999669	0.120176	0.14614	0.822335	0.410886	1	no	no	no	0
FBgn0000256	capu	cappuccino	protein_coding	2L	174	364	368	214	468	217	432	173.894	332.141	332.155	201.454	540.237	218.521	447.522	320.846	0.39684	0.370061	1.07236	0.283557	1	0.782002	0.369989	2.11358	0.0345509	0.613557	0.385162	0.318987	1.20745	0.227258	1	no	no	no	0
FBgn0000257	car	carnation	protein_coding	X	49	59	51	56	67	39	25	48.9702	53.836	46.0323	52.7169	77.3416	39.2734	25.8982	49.1527	0.0303709	0.386757	0.078527	0.937409	1	-0.0270849	0.38671	-0.0700392	0.944162	0.999669	-0.0574558	0.395276	-0.145356	0.88443	1	no	no	no	0
FBgn0000259	CkIIbeta	Casein_kinase_II_beta_subunit	protein_coding	X	9649	12968	13884	11755	9956	11638	11092	9643.13	11833	12531.6	11065.8	11492.7	11719.6	11490.5	11396.6	0.2812	0.144499	1.94604	0.0516502	1	0.251773	0.144529	1.74202	0.0815055	0.834826	-0.0294275	0.104163	-0.282512	0.777551	1	no	no	no	0
FBgn0000261	Cat	Catalase	protein_coding	3L	3256	4957	4444	5109	5942	3825	6015	3254.02	4523.14	4011.13	4809.48	6859.16	3851.81	6231.12	4791.41	0.376724	0.254159	1.48224	0.138278	1	0.699959	0.254146	2.75416	0.00588425	0.237852	0.323235	0.192317	1.68075	0.0928124	1	no	no	no	0
FBgn0000273	Pka-C1	cAMP-dependent_protein_kinase_1	protein_coding	2L	4474	6126	5644	4753	4419	5627	4811	4471.28	5589.82	5094.25	4474.35	5101.08	5666.44	4983.86	5054.44	0.164144	0.181498	0.904387	0.36579	1	0.217949	0.181532	1.20061	0.229903	0.985812	0.0538044	0.132468	0.406167	0.68462	1	no	no	no	0
FBgn0000274	Pka-C2	cAMP-dependent_protein_kinase_2	protein_coding	3R	5	0	0	2	0	0	0	4.99696	0	0	1.88275	0	0	0	0.982815	-0.0997475	0.120008	-0.831174	0.405875	NA	-0.138942	0.11965	-1.16124	0.245546	NA	-0.0391947	0.156193	-0.250938	0.801862	NA	no	no	no	0
FBgn0000276	CecA1	Cecropin_A1	protein_coding	3R	0	11	5	0	0	0	33	0	10.0372	4.51298	0	0	0	34.1857	6.96227	0.00728315	0.161563	0.0450794	0.964044	1	0.107262	0.16151	0.664123	0.506612	NA	0.0999793	0.208553	0.479395	0.631658	NA	no	no	no	0
FBgn0000277	CecA2	Cecropin_A2	protein_coding	3R	1	0	0	0	0	0	0	?	?	?	?	?	?	?	?	?	?	?	?	?	?	?	?	?	?	?	?	?	?	?	no	no	no	#VALUE!
FBgn0000278	CecB	Cecropin_B	protein_coding	3R	0	0	0	0	8	0	23	0	0	0	0	9.23482	0	23.8264	4.72303	0	0.143502	0	1	1	0.147346	0.143498	1.02681	0.304508	NA	0.206355	0.186285	1.10773	0.267977	NA	no	no	no	0
FBgn0000279	CecC	Cecropin_C	protein_coding	3R	0	125	228	15	0	44	326	0	114.059	205.792	14.1206	0	44.3084	337.713	102.285	0.078337	0.197566	0.39651	0.691729	1	0.103135	0.197556	0.522053	0.601634	0.999669	0.0247976	0.251569	0.0985717	0.921478	1	no	no	no	0
FBgn0000280	Cec-Psi1	Cecropin_pseudogene_1	pseudogene	3R	0	0	0	0	0	0	0	?	?	?	?	?	?	?	?	?	?	?	?	?	?	?	?	?	?	?	?	?	?	?	no	no	no	#VALUE!
FBgn0000281	Cec2	Cecropin_2	pseudogene	3R	0	0	0	0	0	0	0	?	?	?	?	?	?	?	?	?	?	?	?	?	?	?	?	?	?	?	?	?	?	?	no	no	no	#VALUE!
FBgn0000283	Cp190	Centrosomal_protein_190kD	protein_coding	3R	2920	2899	2743	2692	2030	3278	2332	2918.22	2645.26	2475.82	2534.18	2343.34	3300.98	2415.79	2661.94	-0.176933	0.219916	-0.804547	0.421081	1	-0.105669	0.219959	-0.480401	0.630942	0.999669	0.0712637	0.163458	0.435975	0.662855	1	no	no	no	0
FBgn0000286	Cf2	Chorion_factor_2	protein_coding	2L	1143	1400	1189	1426	1542	1307	1024	1142.3	1277.46	1073.19	1342.4	1780.01	1316.16	1060.79	1284.62	0.0836439	0.272294	0.307183	0.758704	1	0.241535	0.272316	0.886964	0.375098	0.999669	0.157891	0.20866	0.75669	0.449235	1	no	no	no	0
FBgn0000287	salr	spalt-related	protein_coding	2L	0	13	9	11	8	20	1	0	11.8622	8.12336	10.3551	9.23482	20.1402	1.03593	8.6788	0.179381	0.259575	0.691056	0.48953	1	0.179996	0.259269	0.694246	0.487528	NA	0.000615054	0.319887	0.00192273	0.998466	NA	no	no	no	0
FBgn0000289	cg	combgap	protein_coding	2R	6446	6550	6686	6438	5137	4972	4840	6442.08	5976.71	6034.75	6060.56	5929.91	5006.85	5013.9	5780.68	-0.0890751	0.165808	-0.537217	0.591118	1	-0.265127	0.165893	-1.59818	0.110003	0.903259	-0.176052	0.120521	-1.46076	0.144082	1	no	no	no	0
FBgn0000299	Cg25C	Collagen_type_IV	protein_coding	2L	1269	10440	7944	4327	9040	8950	8294	1268.23	9526.24	7170.22	4073.32	10435.3	9012.73	8592	7154.01	1.93068	0.288276	6.69733	2.12269e-11	2.16845e-08	2.32817	0.288266	8.07649	6.66578e-16	7.39045e-13	0.397493	0.223181	1.78103	0.0749071	1	yes	yes	no	1
FBgn0000303	Cha	Choline_acetyltransferase	protein_coding	3R	0	0	0	0	0	8	0	0	0	0	0	0	8.05607	0	1.15087	0	0.120472	0	1	1	0.101374	0.120385	0.842083	0.399742	NA	0.142093	0.157305	0.903293	0.36637	NA	no	no	no	0
FBgn0000307	chif	chiffon	protein_coding	2L	1553	1612	1740	1722	1131	1139	1141	1552.06	1470.91	1570.52	1621.05	1305.57	1146.98	1182	1407.01	0.00964509	0.201394	0.0478917	0.961803	1	-0.336911	0.201774	-1.66975	0.094969	0.863695	-0.346557	0.148698	-2.33061	0.0197738	1	no	no	no	0
FBgn0000308	chic	chickadee	protein_coding	2L	42510	50336	44793	37992	38022	45106	43949	42484.1	45930.3	40429.9	35764.7	43890.8	45422.2	45528.1	42778.6	-0.0604731	0.164413	-0.367812	0.713014	1	0.0791609	0.164415	0.481469	0.630183	0.999669	0.139634	0.11934	1.17005	0.24198	1	no	no	no	0
FBgn0000316	cin	cinnamon	protein_coding	X	225	268	238	223	136	218	177	224.863	244.543	214.818	209.926	156.992	219.528	183.36	207.719	0.00944828	0.34188	0.0276362	0.977952	1	-0.209699	0.342395	-0.612449	0.54024	0.999669	-0.219148	0.281707	-0.777929	0.436611	1	no	no	no	0
FBgn0000317	ck	crinkled	protein_coding	2L	320	187	273	277	211	189	243	319.805	170.633	246.408	260.761	243.568	190.325	251.731	240.462	-0.36078	0.344452	-1.0474	0.294915	1	-0.346803	0.344655	-1.00623	0.314304	0.999669	0.0139766	0.28512	0.04902	0.960903	1	no	no	no	0
FBgn0000318	cl	clot	protein_coding	2L	1072	1346	1398	1180	1009	1189	1293	1071.35	1228.19	1261.83	1110.82	1164.74	1197.33	1339.46	1196.25	0.147996	0.214113	0.691203	0.489438	1	0.186201	0.214235	0.869146	0.384767	0.999669	0.0382056	0.158353	0.241268	0.809347	1	no	no	no	0
FBgn0000319	Chc	Clathrin_heavy_chain	protein_coding	X	1909	1700	2011	2136	1410	1393	1109	1907.84	1551.21	1815.12	2010.77	1627.64	1402.76	1148.85	1637.74	-0.0680839	0.240762	-0.282785	0.777342	1	-0.411973	0.241004	-1.7094	0.0873762	0.847797	-0.343889	0.181201	-1.89783	0.0577186	1	no	no	no	0
FBgn0000320	eya	eyes_absent	protein_coding	2L	122	204	176	133	116	201	260	121.926	186.145	158.857	125.203	133.905	202.409	269.342	171.112	0.180931	0.375058	0.482409	0.629516	1	0.469801	0.375006	1.25278	0.210285	0.973953	0.28887	0.327437	0.882214	0.377661	1	no	no	no	0
FBgn0000326	clt	cricklet	protein_coding	2R	31	61	51	54	77	16	104	30.9811	55.661	46.0323	50.8342	88.8851	16.1121	107.737	56.6061	0.136815	0.377202	0.36271	0.716822	1	0.389914	0.377214	1.03367	0.301292	0.999669	0.253099	0.399065	0.63423	0.525931	1	no	no	no	0
FBgn0000330	cm	carmine	protein_coding	X	116	122	146	184	126	138	104	115.929	111.322	131.779	173.213	145.448	138.967	107.737	132.056	0.164855	0.374774	0.439877	0.660026	1	0.0967426	0.375029	0.25796	0.796437	0.999669	-0.0681121	0.327509	-0.20797	0.835252	1	no	no	no	0
FBgn0000337	cn	cinnabar	protein_coding	2R	0	0	0	0	0	0	0	?	?	?	?	?	?	?	?	?	?	?	?	?	?	?	?	?	?	?	?	?	?	?	no	no	no	#VALUE!
FBgn0000339	cni	cornichon	protein_coding	2L	891	782	812	639	634	735	681	890.458	713.555	732.907	601.538	731.859	740.152	705.468	730.848	-0.340312	0.24297	-1.40063	0.161324	1	-0.256913	0.243094	-1.05685	0.290582	0.999669	0.083399	0.183365	0.454825	0.649235	1	no	no	no	0
FBgn0000346	comt	comatose	protein_coding	X	63	71	64	72	84	53	25	62.9617	64.7857	57.7661	67.7789	96.9656	53.3715	25.8982	61.3611	0.0159074	0.388908	0.0409028	0.967373	1	-0.0504038	0.388888	-0.12961	0.896875	0.999669	-0.0663112	0.392982	-0.168739	0.866002	1	no	no	no	0
FBgn0000351	cort	cortex	protein_coding	2L	10	3	11	0	15	0	10	9.99392	2.73742	9.92855	0	17.3153	0	10.3593	7.19064	-0.100292	0.20579	-0.487353	0.626008	1	0.0244851	0.205708	0.119028	0.905253	NA	0.124777	0.260998	0.478078	0.632595	NA	no	no	no	0
FBgn0000352	cos	costa	protein_coding	2R	531	372	502	395	253	404	196	530.677	339.441	453.103	371.843	292.051	406.832	203.042	370.998	-0.304865	0.340963	-0.894131	0.371252	1	-0.618694	0.341338	-1.81255	0.0699006	0.797792	-0.313828	0.280904	-1.11721	0.263905	1	no	no	no	0
FBgn0000355	Cp15	Chorion_protein_15	protein_coding	3L	20	10	126	12	63	24	3	19.9878	9.12475	113.727	11.2965	72.7242	24.1682	3.10779	36.3052	0.185287	0.306946	0.603649	0.546077	1	0.0548604	0.306765	0.178835	0.858067	0.999669	-0.130427	0.363393	-0.358915	0.719659	1	no	no	no	0
FBgn0000356	Cp16	Chorion_protein_16	protein_coding	3L	3	4	3	6	11	10	0	2.99818	3.6499	2.70779	5.64824	12.6979	10.0701	0	5.39601	-0.0179838	0.220594	-0.0815243	0.935025	1	0.11693	0.220477	0.530348	0.595871	NA	0.134914	0.277973	0.485348	0.62743	NA	no	no	no	0
FBgn0000357	Cp18	Chorion_protein_18	protein_coding	3L	46	78	47	60	98	109	32	45.972	71.173	42.422	56.4824	113.127	109.764	33.1498	67.4414	0.0391624	0.38893	0.100693	0.919794	1	0.392138	0.388938	1.00823	0.313345	0.999669	0.352976	0.3926	0.899071	0.368615	1	no	no	no	0
FBgn0000358	Cp19	Chorion_protein_19	protein_coding	3L	14	61	27	15	95	91	3	13.9915	55.661	24.3701	14.1206	109.663	91.6378	3.10779	44.6503	0.0348212	0.331584	0.105015	0.916364	1	0.451038	0.331687	1.35983	0.173884	0.949948	0.416217	0.381931	1.08977	0.275814	1	no	no	no	0
FBgn0000359	Cp36	Chorion_protein_36	protein_coding	X	13	23	25	14	58	104	3	12.9921	20.9869	22.5649	13.1792	66.9524	104.729	3.10779	34.9303	-0.0841475	0.330641	-0.254498	0.799111	1	0.503508	0.330893	1.52166	0.128094	0.909928	0.587655	0.381376	1.54088	0.123346	1	no	no	no	0
FBgn0000360	Cp38	Chorion_protein_38	protein_coding	X	35	16	36	17	42	82	6	34.9787	14.5996	32.4934	16.0034	48.4828	82.5747	6.21558	33.6212	-0.240481	0.343012	-0.701086	0.483249	1	0.184135	0.343161	0.536584	0.591555	0.999669	0.424615	0.388694	1.09242	0.274651	1	no	no	no	0
FBgn0000370	crc	cryptocephal	protein_coding	2L	2711	2712	3089	2980	2341	2500	2882	2709.35	2474.63	2788.12	2805.29	2702.34	2517.52	2985.55	2711.83	-0.010435	0.186693	-0.0558939	0.955426	1	0.0131865	0.186766	0.0706047	0.943712	0.999669	0.0236215	0.136644	0.172869	0.862754	1	no	no	no	0
FBgn0000376	crm	cramped	protein_coding	X	2798	4336	3736	3886	3384	3280	3678	2796.3	3956.49	3372.1	3658.18	3906.33	3302.99	3810.15	3543.22	0.363418	0.183947	1.97566	0.048193	1	0.367481	0.184008	1.99709	0.0458151	0.68671	0.00406385	0.134223	0.0302768	0.975846	1	no	no	no	0
FBgn0000377	crn	crooked_neck	protein_coding	X	51	24	86	81	45	137	79	50.969	21.8994	77.6232	76.2513	51.9459	137.96	81.8384	71.2125	-0.00372774	0.386169	-0.00965313	0.992298	1	0.358014	0.386189	0.927045	0.353903	0.999669	0.361742	0.39559	0.914436	0.360488	1	no	no	no	0
FBgn0000382	csw	corkscrew	protein_coding	X	1239	1190	1119	867	1186	988	1076	1238.25	1085.85	1010	816.171	1369.06	994.925	1114.66	1089.84	-0.312895	0.256105	-1.22174	0.221804	1	-0.0730671	0.25609	-0.285318	0.775401	0.999669	0.239828	0.194429	1.2335	0.21739	1	no	no	no	0
FBgn0000384	cta	concertina	protein_coding	2L	74	95	156	75	111	79	117	73.955	86.6851	140.805	70.603	128.133	79.5537	121.204	100.134	0.195186	0.390265	0.500136	0.616979	1	0.295733	0.390319	0.75767	0.448648	0.999669	0.100547	0.362369	0.277472	0.781418	1	no	no	no	0
FBgn0000392	cup	cup	protein_coding	2L	0	0	0	0	0	0	0	?	?	?	?	?	?	?	?	?	?	?	?	?	?	?	?	?	?	?	?	?	?	?	no	no	no	#VALUE!
FBgn0000394	cv	crossveinless	protein_coding	X	60	59	84	71	60	38	84	59.9635	53.836	75.818	66.8375	69.2611	38.2663	87.0181	64.4287	0.0563078	0.392514	0.143454	0.885931	1	0.0466307	0.392558	0.118787	0.905444	0.999669	-0.00967713	0.382938	-0.0252708	0.979839	1	no	no	no	0
FBgn0000395	cv-2	crossveinless_2	protein_coding	2R	117	123	183	188	76	188	125	116.929	112.234	165.175	176.978	87.7308	189.318	129.491	139.694	0.222546	0.384135	0.579342	0.562358	1	0.102622	0.384327	0.267017	0.789456	0.999669	-0.119924	0.345751	-0.34685	0.728704	1	no	no	no	0
FBgn0000404	CycA	Cyclin_A	protein_coding	3L	669	730	762	863	554	554	521	668.593	666.107	687.777	812.406	639.511	557.883	539.719	653.142	0.10748	0.257935	0.416694	0.676902	1	-0.190717	0.258406	-0.73805	0.460484	0.999669	-0.298197	0.196157	-1.5202	0.128462	1	no	no	no	0
FBgn0000405	CycB	Cyclin_B	protein_coding	2R	2962	2439	2802	2322	2077	2176	2179	2960.2	2225.53	2529.07	2185.87	2397.59	2191.25	2257.29	2392.4	-0.332143	0.183554	-1.80951	0.0703719	1	-0.351434	0.183662	-1.91348	0.055687	0.745795	-0.0192902	0.134504	-0.143417	0.885961	1	no	no	no	0
FBgn0000406	Cyt-b5-r	Cytochrome_b5-related	protein_coding	2L	25	207	53	91	565	25	239	24.9848	188.882	47.8375	85.665	652.209	25.1752	247.587	181.763	0.142721	0.371097	0.384593	0.700539	1	0.919541	0.371166	2.47744	0.0132329	0.395441	0.776819	0.399082	1.94651	0.051593	1	no	no	no	0
FBgn0000409	Cyt-c-p	Cytochrome_c_proximal	protein_coding	2L	2544	2630	3009	2705	1946	2405	2601	2542.45	2399.81	2715.91	2546.42	2246.37	2421.86	2694.45	2509.61	0.0072188	0.188667	0.038262	0.969479	1	-0.0484009	0.188778	-0.256391	0.797649	0.999669	-0.0556197	0.138235	-0.402356	0.687422	1	no	no	no	0
FBgn0000411	D	Dichaete	protein_coding	3L	8	18	51	2	29	45	0	7.99513	16.4245	46.0323	1.88275	33.4762	45.3154	0	21.5895	0.0828203	0.266195	0.311127	0.755704	1	0.149193	0.266103	0.56066	0.575029	0.999669	0.0663731	0.326282	0.203423	0.838805	1	no	no	no	0
FBgn0000412	D1	D1_chromosomal_protein	protein_coding	3R	5314	7459	6443	6499	5201	6230	7205	5310.77	6806.15	5815.42	6117.99	6003.79	6273.67	7463.87	6255.95	0.21754	0.182805	1.19001	0.234043	1	0.290558	0.182829	1.58924	0.112006	0.903259	0.0730188	0.133479	0.547041	0.58435	1	no	no	no	0
FBgn0000413	da	daughterless	protein_coding	2L	4194	4849	4000	4553	3437	3595	4469	4191.45	4424.59	3610.38	4286.07	3967.51	3620.2	4629.57	4104.25	-0.0268339	0.199065	-0.134799	0.89277	1	-0.038594	0.199117	-0.193825	0.846313	0.999669	-0.0117601	0.146465	-0.080293	0.936004	1	no	no	no	0
FBgn0000414	Dab	Disabled	protein_coding	3L	1064	1107	895	857	923	677	899	1063.35	1010.11	807.823	806.757	1065.47	681.745	931.301	909.508	-0.237351	0.276257	-0.859168	0.390248	1	-0.210709	0.276364	-0.762434	0.445801	0.999669	0.0266418	0.212787	0.125204	0.900362	1	no	no	no	0
FBgn0000416	Sap-r	Saposin-related	protein_coding	3R	21956	28671	22158	22937	26346	21962	25739	21942.6	26161.6	19999.7	21592.3	30412.6	22115.9	26663.8	24126.9	0.0331468	0.20324	0.163092	0.870446	1	0.249979	0.20324	1.22997	0.218707	0.976764	0.216832	0.149765	1.44781	0.14767	1	no	no	no	0
FBgn0000422	Ddc	Dopa_decarboxylase	protein_coding	2L	4	28	24	2	17	64	53	3.99757	25.5493	21.6623	1.88275	19.624	64.4486	54.9043	27.4384	0.0335918	0.331065	0.101466	0.919181	1	0.597123	0.331365	1.80201	0.0715439	0.800639	0.563531	0.381893	1.47563	0.140045	1	no	no	no	0
FBgn0000426	SmF	Small_ribonucleoprotein_particle_protein_SmF	protein_coding	2R	379	433	497	522	396	473	737	378.769	395.102	448.59	491.397	457.123	476.315	763.48	487.254	0.156705	0.317699	0.493251	0.621835	1	0.464133	0.317636	1.46121	0.143957	0.924298	0.307428	0.253027	1.215	0.224366	1	no	no	no	0
FBgn0000427	dec-1	defective_chorion_1	protein_coding	X	4443	2711	3141	3458	2067	2401	1782	4440.3	2473.72	2835.05	3255.27	2386.05	2417.83	1846.03	2807.75	-0.566809	0.221212	-2.56229	0.0103985	0.633431	-0.915297	0.221389	-4.13433	3.55987e-05	0.00627913	-0.348488	0.164913	-2.11317	0.0345862	1	no	yes	no	1
FBgn0000439	Dfd	Deformed	protein_coding	3R	15	0	0	0	0	87	20	14.9909	0	0	0	0	87.6098	20.7186	17.617	-0.258034	0.228726	-1.12814	0.259262	1	0.26014	0.228903	1.13647	0.255761	0.999669	0.518174	0.286995	1.80552	0.070994	NA	no	no	no	0
FBgn0000442	Pkg21D	cGMP-dependent_protein_kinase_21D	protein_coding	2L	0	0	0	0	23	0	0	0	0	0	0	26.5501	0	0	3.79287	0	0.123893	0	NA	NA	0.107519	0.123868	0.868016	NA	NA	0.150583	0.161621	0.931707	NA	NA	no	no	no	0
FBgn0000447	Dhod	Dihydroorotate_dehydrogenase	protein_coding	3R	25	20	35	49	35	21	68	24.9848	18.2495	31.5908	46.1273	40.4023	21.1472	70.4432	36.135	0.0419869	0.370131	0.113438	0.909683	1	0.267811	0.370138	0.723545	0.469345	0.999669	0.225824	0.39898	0.566004	0.571391	1	no	no	no	0
FBgn0000448	Hr46	Hormone_receptor-like_in_46	protein_coding	2R	595	294	533	569	241	324	115	594.638	268.268	481.083	535.642	278.199	326.271	119.132	371.89	-0.235225	0.374598	-0.62794	0.530043	1	-0.879807	0.374914	-2.34669	0.018941	0.471157	-0.644582	0.327978	-1.96532	0.0493772	1	no	no	no	0
FBgn0000449	dib	disembodied	protein_coding	3L	0	6	0	0	0	0	0	0	5.47485	0	0	0	0	0	0.782121	0.0967272	0.118609	0.815512	0.414779	NA	0	0.118026	0	1	NA	-0.135029	0.154627	-0.873254	0.382525	NA	no	no	no	0
FBgn0000451	ect	ectodermal	protein_coding	3L	58	0	0	17	18	0	0	57.9647	0	0	16.0034	20.7783	0	0	13.5352	-0.237925	0.182839	-1.30128	0.193162	1	-0.219277	0.182766	-1.19977	0.230228	NA	0.0186473	0.234039	0.079676	0.936495	NA	no	no	no	0
FBgn0000454	Dip-B	Dipeptidase_B	protein_coding	3R	8480	12120	9051	6861	9573	12412	9581	8474.84	11059.2	8169.39	6458.77	11050.6	12499	9925.24	9662.44	0.000844471	0.240306	0.00351415	0.997196	1	0.362282	0.240296	1.50765	0.131644	0.917135	0.361438	0.180446	2.00302	0.0451749	1	no	no	no	0
FBgn0000455	Dip-C	Dipeptidase_C	protein_coding	3R	91	70	105	85	76	94	66	90.9447	63.8732	94.7725	80.0168	87.7308	94.6589	68.3714	82.9097	-0.109019	0.388984	-0.280266	0.779274	1	-0.0577692	0.389096	-0.14847	0.881972	0.999669	0.0512496	0.358406	0.142993	0.886296	1	no	no	no	0
FBgn0000459	disco	disconnected	protein_coding	X	25	45	135	15	2	2	56	24.9848	41.0614	121.85	14.1206	2.3087	2.01402	58.0121	37.7646	0.287805	0.302213	0.952325	0.340932	1	-0.135916	0.301885	-0.450223	0.652549	0.999669	-0.423721	0.359333	-1.17919	0.238324	1	no	no	no	0
FBgn0000463	Dl	Delta	protein_coding	3R	591	966	598	620	574	479	977	590.641	881.451	539.752	583.652	662.598	482.357	1012.1	678.936	0.12197	0.336901	0.362034	0.717327	1	0.213065	0.336948	0.632336	0.527167	0.999669	0.0910948	0.275015	0.331236	0.740467	1	no	no	no	0
FBgn0000464	Lar	Leukocyte-antigen-related-like	protein_coding	2L	709	831	942	907	775	805	479	708.569	758.267	850.245	853.826	894.623	810.642	496.21	767.483	0.178724	0.29799	0.599764	0.548663	1	0.0320626	0.298183	0.107527	0.914371	0.999669	-0.146661	0.233293	-0.628658	0.529573	1	no	no	no	0
FBgn0000473	Cyp6a2	Cytochrome_P450-6a2	protein_coding	2R	0	0	0	0	7	0	27	0	0	0	0	8.08047	0	27.9701	5.15008	0	0.147488	0	1	1	0.156389	0.14749	1.06033	0.288993	NA	0.219013	0.191246	1.14519	0.252131	NA	no	no	no	0
FBgn0000477	DNaseII	Deoxyribonuclease_II	protein_coding	3R	32	105	33	114	489	18	112	31.9805	95.8099	29.7856	107.317	564.478	18.1262	116.024	137.646	0.0175805	0.360644	0.0487476	0.96112	1	0.75167	0.360737	2.08371	0.0371868	0.622686	0.73409	0.39676	1.85021	0.0642834	1	no	no	no	0
FBgn0000479	dnc	dunce	protein_coding	X	888	1023	762	942	679	689	644	887.46	933.462	687.777	886.774	783.805	693.829	667.139	791.464	-0.0659883	0.258759	-0.255018	0.798709	1	-0.277107	0.259083	-1.06957	0.284813	0.999669	-0.211119	0.197001	-1.07167	0.283871	1	no	no	no	0
FBgn0000482	dor	deep_orange	protein_coding	X	231	238	400	376	252	287	143	230.859	217.169	361.038	353.957	290.897	289.012	148.138	270.153	0.30481	0.366273	0.832193	0.4053	1	0.0155574	0.366557	0.0424418	0.966146	0.999669	-0.289252	0.313891	-0.921505	0.356787	1	no	no	no	0
FBgn0000489	Pka-C3	cAMP-dependent_protein_kinase_3	protein_coding	3L	64	27	80	61	23	33	2	63.9611	24.6368	72.2076	57.4238	26.5501	33.2313	2.07186	40.0118	0.015372	0.348272	0.0441378	0.964795	1	-0.47587	0.347829	-1.36811	0.171276	0.949948	-0.491242	0.391158	-1.25587	0.209165	1	no	no	no	0
FBgn0000490	dpp	decapentaplegic	protein_coding	2L	452	692	963	365	397	528	458	451.725	631.433	869.199	343.601	458.278	531.701	474.456	537.199	0.338109	0.344718	0.980827	0.326678	1	0.0546412	0.344932	0.158411	0.874133	0.999669	-0.283467	0.284535	-0.99625	0.319129	1	no	no	no	0
FBgn0000492	Dr	Drop	protein_coding	3R	10	31	57	65	28	0	59	9.99392	28.2867	51.4479	61.1893	32.3219	0	61.1199	34.9085	0.295586	0.307939	0.959887	0.337112	1	0.107689	0.307717	0.34996	0.726368	0.999669	-0.187898	0.36427	-0.515821	0.60598	1	no	no	no	0
FBgn0000497	ds	dachsous	protein_coding	2L	3246	2604	2600	2621	1681	2622	2747	3244.03	2376.08	2346.75	2467.34	1940.47	2640.38	2845.7	2551.53	-0.395092	0.222597	-1.77492	0.0759107	1	-0.350288	0.222651	-1.57326	0.115658	0.909928	0.0448035	0.165822	0.27019	0.787014	1	no	no	no	0
FBgn0000499	dsh	dishevelled	protein_coding	X	996	1100	1125	1150	968	1198	1010	995.394	1003.72	1015.42	1082.58	1117.41	1206.4	1046.29	1066.74	0.0466287	0.215266	0.216609	0.828513	1	0.161467	0.215343	0.749814	0.453367	0.999669	0.114838	0.159359	0.720625	0.47114	1	no	no	no	0
FBgn0000500	Dsk	Drosulfakinin	protein_coding	3R	0	0	0	0	0	0	0	?	?	?	?	?	?	?	?	?	?	?	?	?	?	?	?	?	?	?	?	?	?	?	no	no	no	#VALUE!
FBgn0000504	dsx	doublesex	protein_coding	3R	4801	3841	3219	3557	2346	3320	2573	4798.08	3504.82	2905.45	3348.47	2708.11	3343.27	2665.45	3324.81	-0.513389	0.200866	-2.55588	0.0105921	0.637541	-0.670264	0.200978	-3.33501	0.000852963	0.0661984	-0.156875	0.148239	-1.05826	0.289938	1	no	yes	no	1
FBgn0000520	dwg	deformed_wings	protein_coding	X	49	63	34	68	12	0	51	48.9702	57.4859	30.6882	64.0134	13.8522	0	52.8324	38.2632	0.0896748	0.312774	0.286707	0.774336	1	-0.255445	0.312471	-0.817501	0.413642	0.999669	-0.34512	0.367839	-0.938237	0.348122	1	no	no	no	0
FBgn0000524	dx	deltex	protein_coding	X	2365	2298	2548	2210	1683	1983	2195	2363.56	2096.87	2299.81	2080.44	1942.77	1996.9	2273.87	2150.6	-0.120215	0.190181	-0.632106	0.527318	1	-0.178179	0.190311	-0.936252	0.349144	0.999669	-0.0579646	0.139567	-0.415318	0.677909	1	no	no	no	0
FBgn0000527	e	ebony	protein_coding	3R	381	215	266	103	12	481	183	380.768	196.182	240.09	96.9615	13.8522	484.371	189.575	228.829	-0.397398	0.375946	-1.05706	0.290484	1	-0.217885	0.375943	-0.579568	0.562206	0.999669	0.179513	0.399209	0.449673	0.652946	1	no	no	no	0
FBgn0000529	bsh	brain-specific_homeobox	protein_coding	2L	0	0	0	0	0	0	0	?	?	?	?	?	?	?	?	?	?	?	?	?	?	?	?	?	?	?	?	?	?	?	no	no	no	#VALUE!
FBgn0000533	ea	easter	protein_coding	3R	47	23	59	110	42	24	32	46.9714	20.9869	53.2531	103.551	48.4828	24.1682	33.1498	47.2233	0.179905	0.375363	0.479282	0.631738	1	-0.195747	0.375122	-0.521822	0.601794	0.999669	-0.375652	0.399232	-0.940936	0.346738	1	no	no	no	0
FBgn0000535	eag	ether_a_go-go	protein_coding	X	11	8	106	26	1	21	25	10.9933	7.2998	95.6751	24.4757	1.15435	21.1472	25.8982	26.6634	0.360178	0.304887	1.18135	0.237464	1	-0.0564698	0.304421	-0.185499	0.852838	0.999669	-0.416647	0.361633	-1.15213	0.249269	1	no	no	no	0
FBgn0000536	eas	easily_shocked	protein_coding	X	193	480	447	192	342	447	481	192.883	437.988	403.46	180.744	394.788	450.133	498.282	365.468	0.496376	0.358956	1.38283	0.166716	1	0.823857	0.358902	2.29549	0.021705	0.496909	0.32748	0.302279	1.08337	0.278644	1	no	no	no	0
FBgn0000541	E(bx)	Enhancer_of_bithorax	protein_coding	3L	3186	3239	3380	2974	2379	3102	2789	3184.06	2955.51	3050.77	2799.65	2746.2	3123.74	2889.21	2964.16	-0.110495	0.172611	-0.640138	0.522083	1	-0.11788	0.172699	-0.682576	0.494875	0.999669	-0.00738509	0.12577	-0.0587191	0.953176	1	no	no	no	0
FBgn0000542	ec	echinus	protein_coding	X	1152	623	1396	646	383	444	417	1151.3	568.472	1260.02	608.127	442.117	447.112	431.983	701.305	-0.321816	0.335109	-0.960333	0.336888	1	-1.08128	0.335541	-3.22251	0.00127074	0.0857584	-0.759468	0.273939	-2.7724	0.00556454	0.737839	no	yes	no	1
FBgn0000543	ecd	ecdysoneless	protein_coding	3L	177	125	149	116	104	157	201	176.892	114.059	134.487	109.199	120.053	158.1	208.222	145.859	-0.393575	0.372163	-1.05753	0.290268	1	-0.0427265	0.372035	-0.114845	0.908568	0.999669	0.350848	0.323482	1.0846	0.278099	1	no	no	no	0
FBgn0000546	EcR	Ecdysone_receptor	protein_coding	2R	680	870	695	696	855	736	734	679.586	793.853	627.304	655.196	986.971	741.159	760.372	749.206	0.0117021	0.268653	0.0435585	0.965256	1	0.253987	0.268632	0.945482	0.344413	0.999669	0.242285	0.205228	1.18056	0.237776	1	no	no	no	0
FBgn0000547	ed	echinoid	protein_coding	2L	1596	1121	1338	892	879	959	740	1595.03	1022.88	1207.67	839.705	1014.68	965.722	766.588	1058.9	-0.544955	0.261537	-2.08366	0.0371913	1	-0.694734	0.261752	-2.65417	0.00795035	0.2854	-0.149779	0.199817	-0.749583	0.453506	1	no	no	no	0
FBgn0000551	Edg78E	Ecdysone-dependent_gene_78E	protein_coding	3L	0	0	0	0	0	18	0	0	0	0	0	0	18.1262	0	2.58945	0	0.123178	0	NA	NA	0.106218	0.123141	0.862573	NA	NA	0.148786	0.160721	0.925738	NA	NA	no	no	no	0
FBgn0000552	Edg84A	Ecdysone-dependent_gene_84A	protein_coding	3R	0	0	0	0	0	0	0	?	?	?	?	?	?	?	?	?	?	?	?	?	?	?	?	?	?	?	?	?	?	?	no	no	no	#VALUE!
FBgn0000556	Ef1alpha48D	Elongation_factor_1alpha48D	protein_coding	2R	291260	314090	321870	273447	247318	268674	332148	291083	286599	290518	257416	285492	270557	344082	289392	-0.0634768	0.170052	-0.373278	0.708941	1	0.0430038	0.170053	0.252885	0.800357	0.999669	0.106481	0.123674	0.860977	0.389251	1	no	no	no	0
FBgn0000557	Ef1alpha100E	Elongation_factor_1alpha100E	protein_coding	3R	43	134	300	175	81	164	382	42.9738	122.272	270.779	164.74	93.5025	165.149	395.725	179.306	0.746968	0.392571	1.90276	0.0570722	1	0.905262	0.392578	2.30594	0.0211138	0.490612	0.158295	0.376673	0.420244	0.674307	1	no	no	no	0
FBgn0000559	EF2	Elongation_factor_2	protein_coding	2L	31335	33941	34896	32788	29541	31923	35525	31315.9	30970.3	31497	30865.8	34100.7	32146.8	36801.4	32528.3	-0.0106144	0.140309	-0.0756502	0.939697	1	0.129925	0.140312	0.925972	0.354461	0.999669	0.140539	0.101085	1.39031	0.164436	1	no	no	no	0
FBgn0000560	eg	eagle	protein_coding	3L	17	10	0	0	0	8	0	16.9897	9.12475	0	0	0	8.05607	0	4.8815	-0.106803	0.147589	-0.723651	0.46928	1	-0.113388	0.147475	-0.768863	0.441975	NA	-0.00658499	0.191158	-0.0344478	0.97252	NA	no	no	no	0
FBgn0000562	egl	egalitarian	protein_coding	2R	902	858	859	755	779	962	875	901.451	782.904	775.329	710.737	899.24	968.743	906.438	849.263	-0.235497	0.225086	-1.04626	0.295442	1	0.0412521	0.225027	0.18332	0.854547	0.999669	0.276749	0.167781	1.64947	0.0990508	1	no	no	no	0
FBgn0000564	Eh	Eclosion_hormone	protein_coding	3R	0	0	0	0	0	0	0	?	?	?	?	?	?	?	?	?	?	?	?	?	?	?	?	?	?	?	?	?	?	?	no	no	no	#VALUE!
FBgn0000565	Eip71CD	Ecdysone-induced_protein_28/29kD	protein_coding	3L	242	151	211	309	183	199	328	241.853	137.784	190.448	290.884	211.246	200.395	339.785	230.342	-0.165851	0.372937	-0.444715	0.656526	1	0.0554289	0.372933	0.148629	0.881846	0.999669	0.22128	0.324514	0.681881	0.495314	1	no	no	no	0
FBgn0000566	Eip55E	Eip55E	protein_coding	2R	709	498	390	447	468	539	427	708.569	454.413	352.012	420.794	540.237	542.778	442.342	494.449	-0.67299	0.282675	-2.38079	0.0172756	0.818335	-0.385427	0.282599	-1.36387	0.17261	0.949948	0.287563	0.219474	1.31024	0.190116	1	no	no	no	0
FBgn0000567	Eip74EF	Ecdysone-induced_protein_74EF	protein_coding	3L	3784	2874	3704	3690	3416	2779	2217	3781.7	2622.45	3343.21	3473.67	3943.27	2798.48	2296.66	3179.92	-0.226037	0.259883	-0.869767	0.384428	1	-0.284687	0.259934	-1.09523	0.273417	0.999669	-0.0586496	0.197699	-0.296661	0.766725	1	no	no	no	0
FBgn0000568	Eip75B	Ecdysone-induced_protein_75B	protein_coding	3L	5050	3976	4819	4709	3744	3974	2942	5046.93	3628	4349.61	4432.93	4321.89	4001.85	3047.71	4118.42	-0.256886	0.217425	-1.1815	0.237406	1	-0.377696	0.217494	-1.73658	0.0824605	0.837665	-0.12081	0.161463	-0.748223	0.454326	1	no	no	no	0
FBgn0000575	emc	extra_macrochaetae	protein_coding	3L	4513	4427	5456	3687	3495	5310	3824	4510.26	4039.53	4924.56	3470.84	4034.46	5347.22	3961.4	4326.89	-0.111769	0.230193	-0.485543	0.627291	1	-0.0149928	0.230214	-0.0651257	0.948074	0.999669	0.0967761	0.171938	0.562853	0.573535	1	no	no	no	0
FBgn0000576	ems	empty_spiracles	protein_coding	3R	251	457	762	245	496	679	280	250.847	417.001	687.777	230.637	572.559	683.759	290.06	447.52	0.450706	0.377993	1.19237	0.233118	1	0.615978	0.378004	1.62955	0.103196	0.885673	0.165272	0.333001	0.496311	0.619675	1	no	no	no	0
FBgn0000577	en	engrailed	protein_coding	2R	346	428	612	474	325	479	406	345.79	390.539	552.388	446.211	375.164	482.357	420.587	430.434	0.341203	0.302096	1.12946	0.258706	1	0.23289	0.302386	0.770175	0.441196	0.999669	-0.108314	0.236917	-0.45718	0.647542	1	no	no	no	0
FBgn0000578	ena	enabled	protein_coding	2R	3939	6096	4748	3461	4035	4866	3882	3936.6	5562.45	4285.52	3258.09	4657.81	4900.11	4021.48	4374.58	0.129993	0.245138	0.530285	0.595915	1	0.178251	0.245163	0.72707	0.467183	0.999669	0.0482576	0.18459	0.261431	0.793761	1	no	no	no	0
FBgn0000579	Eno	Enolase	protein_coding	2L	3244	3663	4099	3418	3321	3979	3652	3242.03	3342.4	3699.74	3217.62	3833.6	4006.89	3783.22	3589.35	0.0701678	0.168052	0.417536	0.676287	1	0.245932	0.168065	1.46331	0.143381	0.924298	0.175764	0.122008	1.4406	0.149699	1	no	no	no	0
FBgn0000581	E(Pc)	Enhancer_of_Polycomb	protein_coding	2R	3206	3342	3343	2853	2391	2244	2578	3204.05	3049.49	3017.38	2685.74	2760.06	2259.73	2670.63	2806.72	-0.121802	0.191671	-0.635471	0.525121	1	-0.302611	0.191816	-1.57761	0.114654	0.909928	-0.18081	0.140767	-1.28446	0.198982	1	no	no	no	0
FBgn0000588	esc	extra_sexcombs	protein_coding	2L	155	158	132	146	81	131	184	154.906	144.171	119.143	137.441	93.5025	131.918	190.611	138.813	-0.132012	0.379121	-0.348206	0.727686	1	-0.0896841	0.379251	-0.236477	0.813062	0.999669	0.0423281	0.335733	0.126077	0.899671	1	no	no	no	0
FBgn0000591	E(spl)m8-HLH	Enhancer_of_split_m8,_helix-loop-helix	protein_coding	3R	4	13	170	29	4	21	18	3.99757	11.8622	153.441	27.2998	4.61741	21.1472	18.6467	34.4303	0.698412	0.329041	2.12257	0.0337899	1	-0.0629812	0.32833	-0.191823	0.847881	0.999669	-0.761394	0.380054	-2.00338	0.0451361	1	no	no	no	0
FBgn0000592	Est-6	Esterase_6	protein_coding	3L	7	0	0	0	0	0	0	6.99574	0	0	0	0	0	0	0.999392	-0.179399	0.119879	-1.4965	0.134523	1	-0.178519	0.119567	-1.49305	0.135423	NA	0	0.155915	0	1	NA	no	no	no	0
FBgn0000594	Est-P	Esterase_P	protein_coding	3L	0	4	0	0	0	0	0	0	3.6499	0	0	0	0	0	0.521414	0.0887602	0.11587	0.766035	0.443655	NA	0	0.115335	0	1	NA	-0.122067	0.151397	-0.806275	0.420084	NA	no	no	no	0
FBgn0000606	eve	even_skipped	protein_coding	2R	0	0	4	5	0	17	0	0	0	3.61038	4.70687	0	17.1192	0	3.63377	0.00941851	0.137524	0.0684862	0.945399	1	0.071105	0.137441	0.517349	0.604912	NA	0.0616864	0.178768	0.345063	0.730047	NA	no	no	no	0
FBgn0000611	exd	extradenticle	protein_coding	X	879	597	793	301	566	639	422	878.465	544.748	715.758	283.353	653.363	643.479	437.162	593.761	-0.557428	0.349054	-1.59697	0.110273	1	-0.416855	0.349083	-1.19414	0.232422	0.986613	0.140573	0.290451	0.483982	0.628398	1	no	no	no	0
FBgn0000615	exu	exuperantia	protein_coding	2R	102	268	257	208	146	190	132	101.938	244.543	231.967	195.806	168.535	191.332	136.743	181.552	0.796706	0.353373	2.25457	0.02416	0.985105	0.428128	0.354001	1.2094	0.226509	0.98459	-0.368578	0.294218	-1.25274	0.210302	1	no	no	no	0
FBgn0000617	e(y)1	enhancer_of_yellow_1	protein_coding	X	121	129	166	168	116	72	95	120.926	117.709	149.831	158.151	133.905	72.5047	98.4133	121.634	0.178386	0.381599	0.46747	0.640164	1	-0.188901	0.382046	-0.494446	0.620991	0.999669	-0.367287	0.340821	-1.07766	0.281188	1	no	no	no	0
FBgn0000618	e(y)2	enhancer_of_yellow_2	protein_coding	X	15	8	11	18	3	0	8	14.9909	7.2998	9.92855	16.9447	3.46306	0	8.28744	8.70206	0.0118963	0.255942	0.0464806	0.962927	1	-0.242884	0.255264	-0.9515	0.34135	NA	-0.25478	0.315211	-0.808284	0.418927	NA	no	no	no	0
FBgn0000625	eyg	eyegone	protein_coding	3L	11	7	75	12	0	0	13	10.9933	6.38732	67.6946	11.2965	0	0	13.4671	15.6913	0.233345	0.241055	0.968015	0.333037	1	-0.167131	0.240621	-0.69458	0.487319	0.999669	-0.400476	0.300042	-1.33473	0.181963	NA	no	no	no	0
FBgn0000629	E(z)	Enhancer_of_zeste	protein_coding	3L	223	201	228	286	195	243	187	222.864	183.407	205.792	269.233	225.099	244.703	193.719	220.688	-0.0166436	0.344162	-0.0483599	0.961429	1	-0.0069937	0.34438	-0.0203081	0.983798	0.999822	0.00964993	0.284055	0.0339721	0.972899	1	no	no	no	0
FBgn0000633	fas	faint_sausage	protein_coding	2R	39	678	27	31	199	6	1959	38.9763	618.658	24.3701	29.1826	229.716	6.04205	2029.39	425.19	-0.0237753	0.22582	-0.105284	0.91615	1	0.248697	0.225821	1.1013	0.270765	0.999669	0.272473	0.283691	0.960455	0.336826	1	no	no	no	0
FBgn0000635	Fas2	Fasciclin_2	protein_coding	X	69969	65397	55833	67346	43845	50999	63454	69926.4	59673.1	50394.6	63397.8	50612.6	51356.5	65733.9	58727.8	-0.253675	0.191884	-1.32202	0.186161	1	-0.300841	0.191889	-1.56779	0.116931	0.909928	-0.0471657	0.140732	-0.335145	0.737516	1	no	no	no	0
FBgn0000636	Fas3	Fasciclin_3	protein_coding	2L	897	2097	2104	921	1398	1076	1745	896.454	1913.46	1899.06	867.005	1613.78	1083.54	1807.7	1440.14	0.594254	0.327887	1.81237	0.0699287	1	0.546015	0.327939	1.66499	0.095915	0.863695	-0.048239	0.264492	-0.182383	0.855282	1	no	no	no	0
FBgn0000639	Fbp1	Fat_body_protein_1	protein_coding	3L	55810	162792	55592	397158	213980	74251	159927	55776.1	148544	50177.1	373874	247008	74771.4	165673	159403	0.41332	0.367545	1.12454	0.260783	1	0.299092	0.367545	0.813754	0.415786	0.999669	-0.114229	0.398512	-0.286638	0.77439	1	no	no	no	0
FBgn0000640	Fbp2	Fat_body_protein_2	protein_coding	2L	1733	4017	1612	4758	7799	2046	3915	1731.95	3665.41	1454.98	4479.06	9002.79	2060.34	4055.66	3778.6	0.1793	0.384339	0.466516	0.640846	1	0.552063	0.38434	1.4364	0.15089	0.934262	0.372763	0.396959	0.939048	0.347706	1	no	no	no	0
FBgn0000644	Fcp3C	Follicle_cell_protein_3C	protein_coding	X	29	1	10	38	9	17	29	28.9824	0.912475	9.02595	35.7722	10.3892	17.1192	30.042	18.8919	-0.163558	0.298693	-0.547581	0.58398	1	-0.0769204	0.29857	-0.257629	0.796693	0.999669	0.086638	0.35621	0.243222	0.807833	1	no	no	no	0
FBgn0000658	fj	four-jointed	protein_coding	2R	281	351	353	312	167	334	225	280.829	320.279	318.616	293.709	192.777	336.341	233.084	282.234	0.125968	0.339017	0.371568	0.710215	1	-0.123297	0.339436	-0.363242	0.716424	0.999669	-0.249265	0.277925	-0.89688	0.369783	1	no	no	no	0
FBgn0000659	fkh	fork_head	protein_coding	3R	114	30	21	216	78	0	0	113.931	27.3742	18.9545	203.337	90.0395	0	0	64.8051	0.00268239	0.174055	0.0154112	NA	NA	-0.102189	0.174035	-0.587176	NA	NA	-0.104872	0.223674	-0.468859	NA	NA	no	no	no	0
FBgn0000662	fl(2)d	female_lethal_d	protein_coding	2R	1199	1106	934	977	917	869	1006	1198.27	1009.2	843.024	919.722	1058.54	875.091	1042.15	992.284	-0.336867	0.233964	-1.43983	0.149916	1	-0.239909	0.234051	-1.02503	0.30535	0.999669	0.0969582	0.175539	0.552347	0.580711	1	no	no	no	0
FBgn0000667	Actn	alpha_actinin	protein_coding	X	2537	2548	1831	1852	2073	2199	2116	2535.46	2324.99	1652.65	1743.42	2392.97	2214.41	2192.03	2150.85	-0.376591	0.224014	-1.6811	0.0927426	1	-0.138987	0.224005	-0.620463	0.534953	0.999669	0.237604	0.16693	1.42337	0.154628	1	no	no	no	0
FBgn0000709	fliI	flightless_I	protein_coding	X	328	427	437	241	333	416	325	327.801	389.627	394.434	226.871	384.399	418.916	336.677	354.104	0.017787	0.334378	0.0531942	0.957577	1	0.167783	0.334426	0.501705	0.615875	0.999669	0.149996	0.272035	0.551386	0.581369	1	no	no	no	0
FBgn0000711	flw	flapwing	protein_coding	X	503	399	353	312	249	318	334	502.694	364.078	318.616	293.709	287.434	320.229	346.001	347.537	-0.504298	0.299795	-1.68214	0.0925411	1	-0.534533	0.300098	-1.78119	0.0748808	0.815674	-0.030235	0.236495	-0.127846	0.89827	1	no	no	no	0
FBgn0000715	FMRFa	FMRFamide	protein_coding	2R	0	0	0	0	0	0	0	?	?	?	?	?	?	?	?	?	?	?	?	?	?	?	?	?	?	?	?	?	?	?	no	no	no	#VALUE!
FBgn0000719	fog	folded_gastrulation	protein_coding	X	386	438	288	383	393	347	357	385.765	399.664	259.947	360.546	453.66	349.432	369.827	368.406	-0.151263	0.319719	-0.473113	0.636133	1	0.0262989	0.319752	0.082248	0.934449	0.999669	0.177562	0.25591	0.693846	0.487779	1	no	no	no	0
FBgn0000721	for	foraging	protein_coding	2L	608	559	590	744	491	481	519	607.63	510.074	532.531	700.382	566.787	484.371	537.648	562.775	-0.0481381	0.279989	-0.171929	0.863494	1	-0.171142	0.280286	-0.610597	0.541466	0.999669	-0.123004	0.216311	-0.568643	0.569598	1	no	no	no	0
FBgn0000723	FER	FER_ortholog_(H._sapiens)	protein_coding	3R	120	26	197	66	118	52	72	119.927	23.7243	177.811	62.1307	136.214	52.3645	74.5869	92.394	-0.154134	0.381026	-0.404524	0.685828	1	-0.156134	0.38099	-0.409811	0.681944	0.999669	-0.0019999	0.398395	-0.00501988	0.995995	1	no	no	no	0
FBgn0000808	gd	gastrulation-defective	protein_coding	X	15	9	24	53	14	0	20	14.9909	8.21227	21.6623	49.8928	16.1609	0	20.7186	18.8054	0.171926	0.282677	0.608207	0.54305	1	-0.0969471	0.282265	-0.343461	0.731252	0.999669	-0.268873	0.341909	-0.786389	0.431639	1	no	no	no	0
FBgn0000810	fs(1)K10	female_sterile_(1)_K10	protein_coding	X	2586	2894	2588	2397	2055	2196	2480	2584.43	2640.7	2335.92	2256.47	2372.19	2211.39	2569.11	2424.32	-0.0928106	0.190236	-0.487871	0.625641	1	-0.108463	0.190333	-0.569859	0.568774	0.999669	-0.0156522	0.139537	-0.112172	0.910687	1	no	no	no	0
FBgn0000826	png	pan_gu	protein_coding	X	60	58	29	35	8	15	0	59.9635	52.9235	26.1753	32.9481	9.23482	15.1051	0	28.05	-0.0448393	0.323972	-0.138405	0.889921	1	-0.64316	0.323253	-1.98965	0.0466299	0.688949	-0.598321	0.375736	-1.5924	0.111296	1	no	no	no	0
FBgn0000927	fs(1)Ya	female_sterile_(1)_Young_arrest	protein_coding	X	0	12	12	0	12	0	27	0	10.9497	10.8311	0	13.8522	0	27.9701	9.08617	0.0339879	0.20215	0.168132	0.866479	1	0.157345	0.202087	0.778597	0.436217	NA	0.123357	0.256983	0.480018	0.631215	NA	no	no	no	0
FBgn0000928	fs(1)Yb	female_sterile_(1)_Yb	protein_coding	X	238	359	388	536	221	277	231	237.855	327.579	350.207	504.576	255.112	278.942	239.3	313.367	0.582834	0.327535	1.77945	0.0751652	1	0.0462044	0.328247	0.140761	0.888059	0.999669	-0.536629	0.264099	-2.03193	0.0421609	1	no	no	no	0
FBgn0000964	tj	traffic_jam	protein_coding	2L	4323	5379	4683	5359	3650	4284	4438	4320.37	4908.2	4226.85	5044.82	4213.39	4314.03	4597.46	4517.87	0.123967	0.172736	0.717668	0.472962	1	0.0153193	0.172818	0.0886442	0.929365	0.999669	-0.108648	0.125735	-0.864101	0.387532	1	no	no	no	0
FBgn0000996	dup	double_parked	protein_coding	2R	1087	830	939	762	681	1086	742	1086.34	757.354	847.537	717.327	786.114	1093.61	768.66	865.277	-0.424788	0.265449	-1.60026	0.109541	1	-0.248174	0.265474	-0.934832	0.349875	0.999669	0.176614	0.203021	0.86993	0.384339	1	no	no	no	0
FBgn0001075	ft	fat	protein_coding	2L	63	136	340	63	0	82	84	62.9617	124.097	306.882	59.3065	0	82.5747	87.0181	103.263	0.403059	0.335909	1.1999	0.230176	1	-0.159582	0.335728	-0.475332	0.63455	0.999669	-0.562641	0.38444	-1.46353	0.143322	1	no	no	no	0
FBgn0001077	ftz	fushi_tarazu	protein_coding	3R	0	0	0	0	0	0	0	?	?	?	?	?	?	?	?	?	?	?	?	?	?	?	?	?	?	?	?	?	?	?	no	no	no	#VALUE!
FBgn0001078	ftz-f1	ftz_transcription_factor_1	protein_coding	3L	110	117	71	105	93	96	88	109.933	106.76	64.0843	98.8442	107.355	96.6729	91.1618	96.4015	-0.173646	0.38587	-0.450011	0.652702	1	-0.0774445	0.385961	-0.200654	0.840969	0.999669	0.0962014	0.350052	0.274821	0.783454	1	no	no	no	0
FBgn0001079	fu	fused	protein_coding	X	165	194	198	285	126	157	91	164.9	177.02	178.714	268.292	145.448	158.1	94.2696	169.535	0.265614	0.371677	0.714637	0.474833	1	-0.250009	0.372262	-0.671592	0.501843	0.999669	-0.515623	0.322905	-1.59682	0.110305	1	no	no	no	0
FBgn0001083	fw	furrowed	protein_coding	X	0	2	12	2	0	14	0	0	1.82495	10.8311	1.88275	0	14.0981	0	4.091	0.0585414	0.160969	0.363682	0.716096	1	0.0549418	0.160801	0.341675	0.732595	NA	-0.00359958	0.20779	-0.0173232	0.986179	NA	no	no	no	0
FBgn0001084	fy	fuzzy	protein_coding	2L	2	25	21	30	3	0	45	1.99878	22.8119	18.9545	28.2412	3.46306	0	46.6168	17.4409	0.22561	0.266552	0.8464	0.39733	1	0.112027	0.266299	0.420683	0.673987	0.999669	-0.113582	0.326658	-0.34771	0.728058	NA	no	no	no	0
FBgn0001085	fz	frizzled	protein_coding	3L	502	513	707	475	402	421	309	501.695	468.1	638.135	447.153	464.05	423.951	320.102	466.169	0.0558062	0.310166	0.179924	0.857212	1	-0.268561	0.310595	-0.864666	0.387222	0.999669	-0.324367	0.246115	-1.31795	0.18752	1	no	no	no	0
FBgn0001086	fzy	fizzy	protein_coding	2L	1496	2066	1800	1817	1263	1550	1751	1495.09	1885.17	1624.67	1710.48	1457.95	1560.86	1813.91	1649.73	0.202174	0.211652	0.955215	0.339469	1	0.0954602	0.211817	0.450673	0.652225	0.999669	-0.106713	0.156469	-0.682011	0.495232	1	no	no	no	0
FBgn0001087	g	garnet	protein_coding	X	668	743	985	927	669	595	572	667.594	677.969	889.056	872.653	772.262	599.17	592.552	724.465	0.252995	0.27244	0.928625	0.353084	1	-0.0372659	0.272804	-0.136603	0.891345	0.999669	-0.29026	0.208951	-1.38913	0.164793	1	no	no	no	0
FBgn0001089	Gal	beta_galactosidase	protein_coding	2L	553	258	308	175	210	357	361	552.664	235.419	277.999	164.74	242.414	359.502	373.971	315.244	-0.967719	0.343827	-2.81456	0.00488446	0.40485	-0.523045	0.343631	-1.52211	0.127981	0.909928	0.444674	0.284514	1.56293	0.11807	1	no	no	no	0
FBgn0001090	bnb	bangles_and_beads	protein_coding	X	5702	4599	11417	11213	1974	4554	2281	5698.53	4196.47	10304.9	10555.6	2278.69	4585.92	2362.96	5711.87	0.432528	0.38971	1.10987	0.267055	1	-0.593479	0.389723	-1.52282	0.127803	0.909928	-1.02601	0.360493	-2.84612	0.00442558	0.642187	no	no	no	0
FBgn0001091	Gapdh1	Glyceraldehyde_3_phosphate_dehydrogenase_1	protein_coding	2R	1610	2505	3144	3222	2466	2758	2740	1609.02	2285.75	2837.76	3033.11	2846.63	2777.33	2838.45	2604.01	0.693703	0.202263	3.4297	0.000604239	0.091195	0.744907	0.202318	3.68187	0.000231534	0.0268199	0.0512036	0.148318	0.345229	0.729922	1	yes	yes	no	0
FBgn0001092	Gapdh2	Glyceraldehyde_3_phosphate_dehydrogenase_2	protein_coding	X	3286	3523	4064	5603	3615	3699	3809	3284	3214.65	3668.15	5274.52	4172.98	3724.93	3945.86	3897.87	0.268694	0.239967	1.11971	0.262836	1	0.233016	0.24001	0.970858	0.331619	0.999669	-0.0356787	0.180103	-0.198102	0.842965	1	no	no	no	0
FBgn0001098	Gdh	Glutamate_dehydrogenase	protein_coding	3R	9445	13505	10762	11007	12884	10603	11526	9439.26	12323	9713.73	10361.7	14872.7	10677.3	11940.1	11332.5	0.172884	0.20638	0.837699	0.4022	1	0.375478	0.206381	1.81934	0.0688593	0.79713	0.202593	0.152256	1.33061	0.183319	1	no	no	no	0
FBgn0001099	gdl	gonadal	protein_coding	3L	1	13	0	0	0	0	0	0.999392	11.8622	0	0	0	0	0	1.83737	0.080385	0.122429	0.656584	0.511448	1	-0.0533532	0.122155	-0.436766	0.662281	NA	-0.133738	0.1596	-0.83796	0.402053	NA	no	no	no	0
FBgn0001104	Galphai	G_protein_alpha_i_subunit	protein_coding	3L	710	357	471	517	181	440	252	709.568	325.754	425.122	486.69	208.938	443.084	261.054	408.601	-0.531071	0.34856	-1.52362	0.127605	1	-0.897776	0.348909	-2.5731	0.0100793	0.32772	-0.366704	0.290466	-1.26247	0.20678	1	no	no	no	0
FBgn0001105	Gbeta13F	G_protein_beta-subunit_13F	protein_coding	X	2198	2167	2355	1750	1742	1907	1898	2196.66	1977.33	2125.61	1647.4	2010.88	1920.37	1966.19	1977.78	-0.181335	0.203905	-0.889312	0.373835	1	-0.14635	0.203989	-0.71744	0.473103	0.999669	0.0349857	0.150496	0.232469	0.816173	1	no	no	no	0
FBgn0001108	Gl	Glued	protein_coding	3L	557	440	402	723	357	554	348	556.661	401.489	362.843	680.613	412.104	557.883	360.504	476.014	-0.144106	0.33916	-0.42489	0.670917	1	-0.245815	0.339332	-0.724409	0.468815	0.999669	-0.10171	0.278168	-0.365642	0.714632	1	no	no	no	0
FBgn0001112	Gld	Glucose_dehydrogenase	protein_coding	3R	37	71	12	8	12	0	54	36.9775	64.7857	10.8311	7.53099	13.8522	0	55.9402	27.1311	-0.0405548	0.278305	-0.145721	0.884142	1	-0.0969906	0.278154	-0.348695	0.727319	0.999669	-0.0564359	0.337817	-0.16706	0.867322	1	no	no	no	0
FBgn0001114	Glt	Glutactin	protein_coding	2L	15398	29170	22902	15344	35842	21874	22211	15388.6	26616.9	20671.2	14444.4	41374.3	22027.3	23009	23361.7	0.213202	0.370043	0.576154	0.564511	1	0.602836	0.370042	1.6291	0.103291	0.885673	0.389634	0.319735	1.21862	0.22299	1	no	no	no	0
FBgn0001120	gnu	giant_nuclei	protein_coding	3L	681	848	949	998	917	968	1149	680.586	773.779	856.563	939.491	1058.54	974.785	1190.28	924.861	0.281892	0.239359	1.17769	0.238919	1	0.591736	0.23929	2.47289	0.0134027	0.395441	0.309845	0.178795	1.73296	0.0831032	1	no	no	no	0
FBgn0001122	Galphao	G_protein_alpha_o_subunit	protein_coding	2R	1605	1800	1752	1091	1261	1708	1391	1604.02	1642.45	1581.35	1027.04	1455.64	1719.97	1440.98	1495.92	-0.157588	0.263091	-0.598986	0.549182	1	-0.0465755	0.263131	-0.177005	0.859504	0.999669	0.111013	0.200544	0.553556	0.579883	1	no	no	no	0
FBgn0001123	Galphas	G_protein_alpha_s_subunit	protein_coding	2R	526	469	455	537	405	407	463	525.68	427.951	410.681	505.518	467.513	409.853	479.635	460.976	-0.192935	0.279805	-0.689534	0.490487	1	-0.180318	0.280024	-0.643939	0.519615	0.999669	0.0126171	0.216304	0.0583303	0.953486	1	no	no	no	0
FBgn0001124	Got1	Glutamate_oxaloacetate_transaminase_1	protein_coding	2R	233	278	317	380	384	355	280	232.858	253.668	286.123	357.722	443.271	357.488	290.06	317.313	0.24594	0.331419	0.742081	0.458038	1	0.491046	0.331392	1.48177	0.138402	0.920671	0.245106	0.267894	0.914938	0.360224	1	no	no	no	0
FBgn0001125	Got2	Glutamate_oxaloacetate_transaminase_2	protein_coding	2L	574	866	652	980	882	711	632	573.651	790.203	588.492	922.546	1018.14	715.983	654.708	751.96	0.328828	0.303272	1.08427	0.278247	1	0.377108	0.303356	1.24312	0.213824	0.973953	0.0482801	0.238189	0.202697	0.839372	1	no	no	no	0
FBgn0001128	Gpdh	Glycerol_3_phosphate_dehydrogenase	protein_coding	2L	773	1287	826	928	1873	835	917	772.53	1174.36	745.544	873.595	2162.1	840.853	949.948	1074.13	0.148191	0.347848	0.426022	0.670092	1	0.572501	0.347805	1.64604	0.0997551	0.870699	0.424311	0.288303	1.47175	0.141087	1	no	no	no	0
FBgn0001133	grau	grauzone	protein_coding	2R	44	95	104	51	81	54	68	43.9732	86.6851	93.8699	48.0101	93.5025	54.3785	70.4432	70.1232	0.340693	0.392586	0.867817	0.385495	1	0.295421	0.392651	0.752374	0.451826	0.999669	-0.0452724	0.379465	-0.119306	0.905033	1	no	no	no	0
FBgn0001134	Grd	Glycine_receptor	protein_coding	3L	5	26	3	8	9	10	17	4.99696	23.7243	2.70779	7.53099	10.3892	10.0701	17.6108	11.0043	0.104846	0.291297	0.359928	0.718901	1	0.150101	0.291041	0.515739	0.606037	NA	0.0452548	0.35018	0.129233	0.897173	NA	no	no	no	0
FBgn0001137	grk	gurken	protein_coding	2L	85	39	55	21	11	77	82	84.9483	35.5865	49.6427	19.7688	12.6979	77.5397	84.9462	52.1615	-0.45224	0.370295	-1.22129	0.221975	1	-0.112061	0.370349	-0.302582	0.762209	0.999669	0.340179	0.398918	0.852754	0.393796	1	no	no	no	0
FBgn0001138	grn	grain	protein_coding	3R	24	11	128	1	1	0	0	23.9854	10.0372	115.532	0.941374	1.15435	0	0	21.6644	0.281332	0.260678	1.07923	0.280484	1	-0.385478	0.260051	-1.48231	0.138257	0.920671	-0.66681	0.320223	-2.08233	0.0373124	1	no	no	no	0
FBgn0001139	gro	groucho	protein_coding	3R	1275	1174	1340	1285	1056	904	980	1274.22	1071.25	1209.48	1209.67	1219	910.336	1015.21	1129.88	-0.111904	0.236005	-0.474159	0.635387	1	-0.254963	0.236234	-1.07928	0.280462	0.999669	-0.143059	0.177155	-0.807536	0.419358	1	no	no	no	0
FBgn0001142	Gs1	Glutamine_synthetase_1	protein_coding	2L	1310	847	878	2048	1144	747	925	1309.2	772.866	792.478	1927.93	1320.58	752.236	958.235	1119.08	-0.102906	0.35167	-0.292621	0.769812	1	-0.274516	0.351744	-0.780443	0.43513	0.999669	-0.17161	0.293575	-0.584552	0.558849	1	no	no	no	0
FBgn0001145	Gs2	Glutamine_synthetase_2	protein_coding	X	1835	528	461	314	467	488	272	1833.88	481.787	416.096	295.591	539.082	491.42	281.773	619.948	-1.69746	0.329942	-5.14473	2.67906e-07	0.000135453	-1.57955	0.330004	-4.78646	1.69749e-06	0.000572793	0.11791	0.268599	0.43898	0.660676	1	yes	yes	no	0
FBgn0001147	gsb-n	gooseberry-neuro	protein_coding	2R	0	0	18	0	0	12	1	0	0	16.2467	0	0	12.0841	1.03593	4.19525	0.0512163	0.139563	0.366976	0.713637	1	0.0318916	0.139448	0.228699	0.819103	NA	-0.0193246	0.181293	-0.106593	0.915112	NA	no	no	no	0
FBgn0001148	gsb	gooseberry	protein_coding	2R	1	10	20	2	0	0	0	0.999392	9.12475	18.0519	1.88275	0	0	0	4.29411	0.220468	0.181848	1.21237	0.22537	1	-0.111221	0.181214	-0.613755	0.539377	NA	-0.331689	0.232743	-1.42513	0.15412	NA	no	no	no	0
FBgn0001149	GstD1	Glutathione_S_transferase_D1	protein_coding	3R	7030	11269	9356	8311	14636	11395	11608	7025.72	10282.7	8444.68	7823.76	16895.1	11474.9	12025.1	10567.4	0.281019	0.226044	1.2432	0.213794	1	0.858328	0.226019	3.7976	0.000146106	0.0192191	0.577309	0.168319	3.42985	0.000603909	0.181166	no	yes	no	1
FBgn0001150	gt	giant	protein_coding	X	39	126	24	108	88	62	76	38.9763	114.972	21.6623	101.668	101.583	62.4346	78.7307	74.2896	0.319734	0.385556	0.829279	0.406947	1	0.334691	0.38553	0.868131	0.385323	0.999669	0.014957	0.395966	0.0377734	0.969868	1	no	no	no	0
FBgn0001168	h	hairy	protein_coding	3L	3449	3480	2499	2935	2643	2281	2471	3446.9	3175.41	2255.59	2762.93	3050.95	2296.99	2559.78	2792.65	-0.298967	0.229513	-1.30261	0.192707	1	-0.347897	0.229586	-1.51533	0.12969	0.913186	-0.0489309	0.171544	-0.285239	0.775461	1	no	no	no	0
FBgn0001169	H	Hairless	protein_coding	3R	2243	2263	2495	2410	1939	1998	2096	2241.64	2064.93	2251.97	2268.71	2238.29	2012	2171.31	2178.41	-0.0276353	0.181523	-0.152241	0.878997	1	-0.0630882	0.181648	-0.347311	0.728358	0.999669	-0.0354529	0.132662	-0.267242	0.789283	1	no	no	no	0
FBgn0001170	H2.0	Homeodomain_protein_2.0	protein_coding	2L	0	15	28	0	0	6	0	0	13.6871	25.2727	0	0	6.04205	0	6.42883	0.161295	0.166825	0.966854	0.333617	1	-0.0384163	0.166588	-0.230606	0.817621	NA	-0.199712	0.21486	-0.929496	0.352632	NA	no	no	no	0
FBgn0001174	halo	halo	protein_coding	2L	0	0	0	0	0	0	0	?	?	?	?	?	?	?	?	?	?	?	?	?	?	?	?	?	?	?	?	?	?	?	no	no	no	#VALUE!
FBgn0001179	hay	haywire	protein_coding	3L	382	306	420	320	444	228	320	381.768	279.217	379.09	301.24	512.532	229.598	331.498	344.992	-0.187259	0.353853	-0.5292	0.596667	1	-0.0528785	0.3539	-0.149416	0.881225	0.999669	0.134381	0.296497	0.453228	0.650385	1	no	no	no	0
FBgn0001180	hb	hunchback	protein_coding	3R	0	0	0	4	12	0	0	0	0	0	3.76549	13.8522	0	0	2.51682	-0.0092475	0.123201	-0.0750601	0.940167	1	0.0729022	0.123125	0.592098	0.553785	NA	0.0821497	0.160725	0.51112	0.609267	NA	no	no	no	0
FBgn0001185	her	hermaphrodite	protein_coding	2L	154	129	208	117	151	105	116	153.906	117.709	187.74	110.141	174.307	105.736	120.168	138.53	-0.0836578	0.381203	-0.219457	0.826294	1	-0.125953	0.38138	-0.330255	0.741207	0.999669	-0.0422949	0.339843	-0.124454	0.900955	1	no	no	no	0
FBgn0001186	Hex-A	Hexokinase_A	protein_coding	X	2610	3429	2509	2475	2674	2525	2228	2608.41	3128.88	2264.61	2329.9	3086.74	2542.7	2308.05	2609.9	-0.0179632	0.235528	-0.0762679	0.939206	1	0.0192998	0.235576	0.081926	0.934706	0.999669	0.037263	0.176426	0.211211	0.832723	1	no	no	no	0
FBgn0001187	Hex-C	Hexokinase_C	protein_coding	2R	0	0	0	0	0	0	0	?	?	?	?	?	?	?	?	?	?	?	?	?	?	?	?	?	?	?	?	?	?	?	no	no	no	#VALUE!
FBgn0001189	hfw	halfway	protein_coding	X	1261	1235	1307	1415	981	1113	849	1260.23	1126.91	1179.69	1332.04	1132.42	1120.8	879.504	1147.37	-0.0425203	0.235989	-0.180179	0.857012	1	-0.247337	0.236253	-1.04692	0.295138	0.999669	-0.204817	0.17711	-1.15644	0.247501	1	no	no	no	0
FBgn0001197	His2Av	Histone_H2A_variant	protein_coding	3R	2608	2541	2570	2005	1478	2199	2012	2606.41	2318.6	2319.67	1887.45	1706.13	2214.41	2084.29	2162.42	-0.233122	0.21853	-1.06678	0.286072	1	-0.347724	0.218657	-1.59027	0.111774	0.903259	-0.114601	0.162489	-0.705286	0.480633	1	no	no	no	0
FBgn0001202	hk	hook	protein_coding	2L	157	160	148	191	169	140	178	156.905	145.996	133.584	179.802	195.086	140.981	184.395	162.393	-0.037695	0.361312	-0.104328	0.916909	1	0.109792	0.361382	0.303811	0.761272	0.999669	0.147487	0.306523	0.481161	0.630402	1	no	no	no	0
FBgn0001206	Hmr	Hybrid_male_rescue	protein_coding	X	882	1151	1228	976	922	874	963	881.464	1050.26	1108.39	918.781	1064.31	880.126	997.6	985.847	0.196442	0.23419	0.838812	0.401575	1	0.134476	0.234389	0.57373	0.566151	0.999669	-0.061966	0.17507	-0.353949	0.723377	1	no	no	no	0
FBgn0001208	Hn	Henna	protein_coding	3L	227	643	347	1079	2352	178	707	226.862	586.721	313.2	1015.74	2715.04	179.248	732.402	824.173	0.102855	0.339911	0.302594	0.7622	1	0.469703	0.339915	1.38182	0.167026	0.946527	0.366848	0.386906	0.948157	0.34305	1	no	no	no	0
FBgn0001215	Hrb98DE	Heterogeneous_nuclear_ribonucleoprotein_at_98DE	protein_coding	3R	3306	3836	4061	3307	2763	3385	3036	3303.99	3500.25	3665.44	3113.12	3189.48	3408.73	3145.08	3332.3	0.0506362	0.175214	0.288997	0.772584	1	-0.0245269	0.175312	-0.139904	0.888736	0.999669	-0.0751631	0.127688	-0.588649	0.556097	1	no	no	no	0
FBgn0001216	Hsc70-1	Heat_shock_protein_cognate_1	protein_coding	3L	0	0	6	0	0	0	16	0	0	5.41557	0	0	0	16.5749	3.14149	-0.00452974	0.123663	-0.0366296	0.97078	1	0.0687063	0.123598	0.555884	0.57829	NA	0.073236	0.161308	0.454013	0.64982	NA	no	no	no	0
FBgn0001217	Hsc70-2	Heat_shock_protein_cognate_2	protein_coding	3R	0	1	0	0	0	0	0	?	?	?	?	?	?	?	?	?	?	?	?	?	?	?	?	?	?	?	?	?	?	?	no	no	no	#VALUE!
FBgn0001218	Hsc70-3	Heat_shock_70-kDa_protein_cognate_3	protein_coding	X	44762	50671	59608	48276	44131	46890	50756	44734.8	46236	53801.9	45445.8	50942.7	47218.7	52579.6	48708.5	0.110348	0.156077	0.707007	0.479562	1	0.16051	0.156081	1.02837	0.303774	0.999669	0.0501625	0.112974	0.444018	0.657029	1	no	no	no	0
FBgn0001220	Hsc70-5	Heat_shock_protein_cognate_5	protein_coding	2R	2051	2096	2449	2280	1905	2426	1665	2049.75	1912.55	2210.46	2146.33	2199.04	2443	1724.82	2097.99	0.0244563	0.224675	0.108852	0.91332	1	0.045705	0.224746	0.203363	0.838851	0.999669	0.0212486	0.167291	0.127016	0.898928	1	no	no	no	0
FBgn0001222	Hsf	Heat_shock_factor	protein_coding	2R	126	105	169	164	65	165	82	125.923	95.8099	152.539	154.385	75.0329	166.156	84.9462	122.113	0.0780289	0.38939	0.200388	0.841178	1	-0.138977	0.389583	-0.356733	0.721292	0.999669	-0.217006	0.359758	-0.6032	0.546376	1	no	no	no	0
FBgn0001223	Hsp22	Heat_shock_protein_22	protein_coding	3L	0	0	0	0	0	0	0	?	?	?	?	?	?	?	?	?	?	?	?	?	?	?	?	?	?	?	?	?	?	?	no	no	no	#VALUE!
FBgn0001224	Hsp23	Heat_shock_protein_23	protein_coding	3L	4263	2211	3962	4132	2229	5227	2461	4260.41	2017.48	3576.08	3889.76	2573.05	5263.64	2549.42	3447.12	-0.33531	0.323907	-1.0352	0.300574	1	-0.220016	0.323916	-0.679238	0.496987	0.999669	0.115293	0.260419	0.442723	0.657966	1	no	no	no	0
FBgn0001225	Hsp26	Heat_shock_protein_26	protein_coding	3L	4301	3558	4261	2429	3046	5531	3790	4298.38	3246.59	3845.96	2286.6	3516.16	5569.77	3926.17	3812.8	-0.407362	0.271355	-1.50122	0.133299	1	0.0303132	0.271323	0.111724	0.911042	0.999669	0.437676	0.207996	2.10425	0.0353565	1	no	no	no	0
FBgn0001226	Hsp27	Heat_shock_protein_27	protein_coding	3L	10970	5978	11667	6659	6236	11216	6912	10963.3	5454.78	10530.6	6268.61	7198.54	11294.6	7160.35	8410.11	-0.471881	0.289786	-1.62838	0.103445	1	-0.284799	0.289787	-0.982786	0.325713	0.999669	0.187082	0.225342	0.830213	0.406419	1	no	no	no	0
FBgn0001227	Hsp67Ba	Heat_shock_gene_67Ba	protein_coding	3L	660	357	543	585	190	800	313	659.599	325.754	490.109	550.704	219.327	805.607	324.246	482.192	-0.318966	0.379887	-0.839633	0.401114	1	-0.332504	0.379937	-0.875155	0.381489	0.999669	-0.0135377	0.337105	-0.0401587	0.967967	1	no	no	no	0
FBgn0001228	Hsp67Bb	Heat_shock_gene_67Bb	protein_coding	3L	0	0	0	0	0	0	0	?	?	?	?	?	?	?	?	?	?	?	?	?	?	?	?	?	?	?	?	?	?	?	no	no	no	#VALUE!
FBgn0001229	Hsp67Bc	Heat_shock_gene_67Bc	protein_coding	3L	481	58	164	320	281	172	34	480.707	52.9235	148.026	301.24	324.373	173.206	35.2216	216.528	-0.612819	0.384924	-1.59205	0.111372	1	-0.567902	0.384914	-1.4754	0.140105	0.923466	0.0449178	0.396724	0.113222	0.909855	1	no	no	no	0
FBgn0001230	Hsp68	Heat_shock_protein_68	protein_coding	3R	227	161	183	313	222	125	162	226.862	146.908	165.175	294.65	256.266	125.876	167.821	197.651	-0.0851602	0.380698	-0.223695	0.822995	1	-0.193743	0.380859	-0.508699	0.610963	0.999669	-0.108582	0.338813	-0.320479	0.748605	1	no	no	no	0
FBgn0001233	Hsp83	Heat_shock_protein_83	protein_coding	3L	15418	14235	17512	13547	11138	18354	14326	15408.6	12989.1	15806.2	12752.8	12857.2	18482.6	14840.7	14733.9	-0.144287	0.208578	-0.691766	0.489084	1	0.00233711	0.208582	0.0112047	0.99106	0.999822	0.146624	0.154097	0.951506	0.341347	1	no	no	no	0
FBgn0001234	Hsromega	Heat_shock_RNA_omega	lincRNA	3R	495	491	631	558	597	291	277	494.699	448.025	569.537	525.287	689.148	293.04	286.953	472.384	0.0595214	0.358636	0.165966	0.868184	1	-0.173729	0.35881	-0.484181	0.628257	0.999669	-0.233251	0.303002	-0.769799	0.441419	1	no	no	no	0
FBgn0001235	hth	homothorax	protein_coding	3R	1902	1095	2851	1475	795	1908	783	1900.84	999.16	2573.3	1388.53	917.71	1921.37	811.133	1501.72	-0.103942	0.358039	-0.29031	0.771579	1	-0.468861	0.358114	-1.30925	0.190449	0.956693	-0.364918	0.302134	-1.2078	0.227123	1	no	no	no	0
FBgn0001247	Ide	Insulin_degrading_metalloproteinase	protein_coding	3L	1072	950	1167	1084	1007	823	682	1071.35	866.851	1053.33	1020.45	1162.43	828.768	706.504	958.526	-0.101657	0.279168	-0.364142	0.715752	1	-0.216611	0.27934	-0.775438	0.438081	0.999669	-0.114954	0.215453	-0.533547	0.593655	1	no	no	no	0
FBgn0001248	Idh	Isocitrate_dehydrogenase	protein_coding	3L	2380	2529	2874	2416	2072	3577	2309	2378.55	2307.65	2594.06	2274.36	2391.82	3602.07	2391.96	2562.92	-0.000136362	0.242307	-0.000562766	0.999551	1	0.212409	0.242307	0.876609	0.380699	0.999669	0.212545	0.182126	1.16702	0.243202	1	no	no	no	0
FBgn0001250	if	inflated	protein_coding	X	308	168	118	170	134	213	180	307.813	153.296	106.506	160.034	154.683	214.493	186.467	183.327	-0.806866	0.358919	-2.24805	0.0245732	0.985726	-0.475327	0.358791	-1.3248	0.185236	0.950765	0.331539	0.304416	1.0891	0.27611	1	no	no	no	0
FBgn0001253	ImpE1	Ecdysone-inducible_gene_E1	protein_coding	3L	2090	1764	5191	2139	862	1768	1332	2088.73	1609.61	4685.37	2013.6	995.052	1780.39	1379.86	2078.94	0.296637	0.39258	0.755608	0.449884	1	-0.375511	0.392593	-0.95649	0.338825	0.999669	-0.672148	0.374183	-1.79631	0.0724454	1	no	no	no	0
FBgn0001254	ImpE2	Ecdysone-inducible_gene_E2	protein_coding	3L	241	417	10595	121	20	3193	1195	240.853	380.502	9562.99	113.906	23.087	3215.38	1237.94	2110.67	0.207606	0.227659	0.911915	0.361813	1	0.0162434	0.227657	0.0713502	0.943119	0.999669	-0.191362	0.285716	-0.669764	0.503008	1	no	no	no	0
FBgn0001255	ImpE3	Ecdysone-inducible_gene_E3	protein_coding	3R	47	59	285	60	14	103	75	46.9714	53.836	257.24	56.4824	16.1609	103.722	77.6947	87.4439	0.462425	0.371036	1.24631	0.21265	1	0.0175267	0.370878	0.0472573	0.962308	0.999669	-0.444899	0.399058	-1.11487	0.264905	1	no	no	no	0
FBgn0001256	ImpL1	Ecdysone-inducible_gene_L1	protein_coding	3L	12	8	5	0	0	0	0	11.9927	7.2998	4.51298	0	0	0	0	3.40078	-0.0583361	0.145937	-0.399735	0.689352	1	-0.165597	0.145702	-1.13655	0.255727	NA	-0.107261	0.188989	-0.567553	0.570339	NA	no	no	no	0
FBgn0001257	ImpL2	Ecdysone-inducible_gene_L2	protein_coding	3L	8662	11964	6924	5806	6845	6146	10421	8656.73	10916.9	6249.57	5465.62	7901.54	6189.08	10795.4	8024.97	-0.167042	0.29681	-0.562792	0.573577	1	-0.0428816	0.296815	-0.144472	0.885127	0.999669	0.124161	0.232179	0.534764	0.592813	1	no	no	no	0
FBgn0001258	ImpL3	Ecdysone-inducible_gene_L3	protein_coding	3L	196	390	610	56	331	299	212	195.881	355.865	550.583	52.7169	382.091	301.096	219.617	293.978	0.291847	0.392121	0.744278	0.456708	1	0.235732	0.392129	0.60116	0.547733	0.999669	-0.0561149	0.385387	-0.145607	0.884232	1	no	no	no	0
FBgn0001259	in	inturned	protein_coding	3L	0	0	30	0	0	0	0	0	0	27.0779	0	0	0	0	3.86826	0.107332	0.123988	0.865666	NA	NA	0	0.123844	0	NA	NA	-0.150162	0.161658	-0.928891	NA	NA	no	no	no	0
FBgn0001263	inaD	inactivation_no_afterpotential_D	protein_coding	2R	1	0	0	0	0	0	0	?	?	?	?	?	?	?	?	?	?	?	?	?	?	?	?	?	?	?	?	?	?	?	no	no	no	#VALUE!
FBgn0001269	inv	invected	protein_coding	2R	83	46	43	64	59	104	34	82.9495	41.9738	38.8116	60.2479	68.1068	104.729	35.2216	61.72	-0.386865	0.390413	-0.990915	0.321727	1	-0.054004	0.390414	-0.138325	0.889984	0.999669	0.332862	0.390896	0.851535	0.394472	1	no	no	no	0
FBgn0001276	ix	intersex	protein_coding	2R	327	332	295	263	105	279	275	326.801	302.942	266.266	247.581	121.207	280.956	284.881	261.519	-0.151187	0.367568	-0.411318	0.680839	1	-0.350476	0.36781	-0.952871	0.340655	0.999669	-0.199288	0.316366	-0.629931	0.52874	1	no	no	no	0
FBgn0001280	janA	janus_A	protein_coding	3R	178	128	132	117	69	203	115	177.892	116.797	119.143	110.141	79.6503	204.423	119.132	132.454	-0.369023	0.386548	-0.954664	0.339748	1	-0.206714	0.386576	-0.53473	0.592836	0.999669	0.162309	0.351748	0.461436	0.644486	1	no	no	no	0
FBgn0001281	janB	janus_B	protein_coding	3R	0	0	0	0	0	0	5	0	0	0	0	0	0	5.17965	0.73995	0	0.117935	0	1	NA	0.0969497	0.117798	0.823017	0.410498	NA	0.135974	0.154088	0.882444	0.377536	NA	no	no	no	0
FBgn0001285	Jon44E	Jonah_44E	protein_coding	2R	0	0	0	0	0	0	0	?	?	?	?	?	?	?	?	?	?	?	?	?	?	?	?	?	?	?	?	?	?	?	no	no	no	#VALUE!
FBgn0001291	Jra	Jun-related_antigen	protein_coding	2R	1451	1560	1778	1583	1425	1361	1551	1450.12	1423.46	1604.81	1490.19	1644.95	1370.54	1606.73	1512.97	0.0492592	0.208129	0.236676	0.812908	1	0.0805474	0.208235	0.386811	0.698896	0.999669	0.0312883	0.153668	0.20361	0.838658	1	no	no	no	0
FBgn0001296	kar	karmoisin	protein_coding	3R	837	538	707	747	536	560	432	836.491	490.912	638.135	703.206	618.733	563.925	447.522	614.132	-0.365465	0.289298	-1.26328	0.206487	1	-0.519249	0.289582	-1.79309	0.0729577	0.804297	-0.153783	0.225631	-0.68157	0.495511	1	no	no	no	0
FBgn0001297	kay	kayak	protein_coding	3R	1405	1074	1189	883	983	1148	840	1404.15	979.998	1073.19	831.233	1134.73	1156.05	870.181	1064.22	-0.48064	0.2513	-1.91262	0.0557971	1	-0.356762	0.251355	-1.41935	0.155796	0.934575	0.123878	0.190505	0.650263	0.515522	1	no	no	no	0
FBgn0001301	kel	kelch	protein_coding	2L	708	1610	1336	991	1119	1299	1049	707.569	1469.08	1205.87	932.901	1291.72	1308.1	1086.69	1143.13	0.648364	0.264954	2.44708	0.0144019	0.762469	0.677215	0.26504	2.55514	0.0106144	0.3412	0.0288515	0.201273	0.143345	0.886017	1	no	no	no	0
FBgn0001308	Khc	Kinesin_heavy_chain	protein_coding	2R	1645	1544	1328	981	1107	1370	1091	1644	1408.86	1198.65	923.488	1277.87	1379.6	1130.2	1280.38	-0.421636	0.25476	-1.65503	0.097918	1	-0.32682	0.254819	-1.28255	0.199648	0.964429	0.0948168	0.193415	0.490225	0.623975	1	no	no	no	0
FBgn0001311	kkv	krotzkopf_verkehrt	protein_coding	3R	7	24	113	28	7	20	49	6.99574	21.8994	101.993	26.3585	8.08047	20.1402	50.7606	33.7469	0.51842	0.34242	1.51399	0.130029	1	0.138192	0.342008	0.404061	0.686168	0.999669	-0.380228	0.388546	-0.978593	0.327781	1	no	no	no	0
FBgn0001313	kl-2	male_fertility_factor_kl2	protein_coding	Y	0	0	0	0	0	0	0	?	?	?	?	?	?	?	?	?	?	?	?	?	?	?	?	?	?	?	?	?	?	?	no	no	no	#VALUE!
FBgn0001316	klar	klarsicht	protein_coding	3L	2656	1990	2483	1897	1634	2017	1903	2654.38	1815.83	2241.14	1785.79	1886.21	2031.14	1971.37	2055.12	-0.411008	0.202966	-2.02501	0.0428667	1	-0.400074	0.203061	-1.97022	0.0488135	0.705778	0.0109338	0.149949	0.0729163	0.941873	1	no	no	no	0
FBgn0001319	kn	knot	protein_coding	2R	9	0	8	20	11	0	0	8.99453	0	7.22076	18.8275	12.6979	0	0	6.82009	0.0207588	0.178228	0.116474	0.907277	1	-0.0654673	0.178038	-0.367715	0.713086	NA	-0.0862261	0.228573	-0.377236	0.705998	NA	no	no	no	0
FBgn0001320	kni	knirps	protein_coding	3L	68	26	143	13	7	49	210	67.9586	23.7243	129.071	12.2379	8.08047	49.3434	217.545	72.5659	-0.115141	0.332438	-0.346352	0.729078	1	0.146613	0.332453	0.441003	0.659211	0.999669	0.261753	0.382271	0.684732	0.493513	1	no	no	no	0
FBgn0001321	knk	knickkopf	protein_coding	3R	6	6	18	6	1	43	16	5.99635	5.47485	16.2467	5.64824	1.15435	43.3014	16.5749	13.4853	-0.0297068	0.280746	-0.105814	0.91573	1	0.258389	0.280833	0.920081	0.35753	NA	0.288096	0.340549	0.845974	0.397567	NA	no	no	no	0
FBgn0001323	knrl	knirps-like	protein_coding	3L	67	23	44	7	19	42	60	66.9592	20.9869	39.7142	6.58962	21.9327	42.2944	62.1558	37.2333	-0.510893	0.361227	-1.41433	0.157266	1	-0.131839	0.361335	-0.364866	0.715211	0.999669	0.379054	0.396716	0.955481	0.339335	1	no	no	no	0
FBgn0001324	kto	kohtalo	protein_coding	3L	885	810	970	752	492	635	633	884.462	739.105	875.517	707.913	567.941	639.451	655.744	724.305	-0.156696	0.250472	-0.625603	0.531576	1	-0.455116	0.250937	-1.81366	0.0697294	0.797792	-0.29842	0.19005	-1.57022	0.116364	1	no	no	no	0
FBgn0001325	Kr	Kruppel	protein_coding	2R	89	398	84	940	648	79	499	88.9459	363.165	75.818	884.891	748.02	79.5537	516.929	393.903	0.25617	0.322705	0.793821	0.4273	1	0.264066	0.322695	0.818316	0.413177	0.999669	0.00789571	0.375565	0.0210236	0.983227	1	no	no	no	0
FBgn0001330	kz	kurz	protein_coding	X	191	243	198	160	129	168	217	190.884	221.731	178.714	150.62	148.911	169.178	224.797	183.548	-0.0350687	0.360885	-0.0971741	0.922588	1	-0.0524435	0.361105	-0.145231	0.884529	0.999669	-0.0173748	0.30622	-0.0567397	0.954753	1	no	no	no	0
FBgn0001332	L	Lobe	protein_coding	2R	715	1041	712	963	804	547	963	714.565	949.886	642.648	906.543	928.099	550.834	997.6	812.882	0.172594	0.312714	0.551921	0.581003	1	0.160729	0.312811	0.51382	0.607378	0.999669	-0.011865	0.248209	-0.0478022	0.961874	1	no	no	no	0
FBgn0001341	l(1)1Bi	lethal_(1)_1Bi	protein_coding	X	95	114	139	104	82	223	123	94.9422	104.022	125.461	97.9029	94.6569	224.563	127.419	124.138	0.0587666	0.387557	0.151634	0.879476	1	0.389102	0.387496	1.00415	0.315309	0.999669	0.330336	0.353786	0.933717	0.35045	1	no	no	no	0
FBgn0001404	egh	egghead	protein_coding	X	1425	1609	1583	1564	1329	1121	1189	1424.13	1468.17	1428.81	1472.31	1534.13	1128.86	1231.72	1384.02	0.0336837	0.226557	0.148677	0.881809	1	-0.124774	0.226764	-0.550238	0.582156	0.999669	-0.158458	0.169006	-0.937588	0.348456	1	no	no	no	0
FBgn0001491	l(1)10Bb	lethal_(1)_10Bb	protein_coding	X	100	149	126	158	89	144	51	99.9392	135.959	113.727	148.737	102.737	145.009	52.8324	114.134	0.249811	0.390199	0.640215	0.522033	1	-0.0393313	0.390414	-0.100743	0.919755	0.999669	-0.289142	0.362488	-0.797659	0.425068	1	no	no	no	0
FBgn0001565	Hlc	Helicase	protein_coding	X	367	182	191	270	205	317	177	366.777	166.07	172.396	254.171	236.642	319.222	183.36	242.662	-0.633955	0.357829	-1.77167	0.0764491	1	-0.371245	0.357789	-1.03761	0.299452	0.999669	0.26271	0.302468	0.868554	0.385091	1	no	no	no	0
FBgn0001612	Grip91	Gamma-tubulin_ring_protein_91	protein_coding	X	747	949	1027	940	556	758	651	746.546	865.939	926.965	884.891	641.82	763.313	674.39	786.266	0.239947	0.235849	1.01738	0.308975	1	-0.105736	0.236356	-0.447359	0.654616	0.999669	-0.345683	0.176788	-1.95536	0.0505405	1	no	no	no	0
FBgn0001624	dlg1	discs_large_1	protein_coding	X	2957	2630	2337	2269	1456	2259	2040	2955.2	2399.81	2109.36	2135.98	1680.74	2274.83	2113.3	2238.46	-0.375088	0.214539	-1.74834	0.0804046	1	-0.500208	0.214673	-2.3301	0.0198011	0.476713	-0.12512	0.15932	-0.785338	0.432256	1	no	no	no	0
FBgn0001941	ifc	infertile_crescent	protein_coding	2L	1130	1083	1299	1029	1041	1055	859	1129.31	988.21	1172.47	968.674	1201.68	1062.39	889.864	1058.94	-0.100746	0.245647	-0.410126	0.681714	1	-0.0904013	0.245775	-0.367822	0.713006	0.999669	0.010345	0.185247	0.055844	0.955466	1	no	no	no	0
FBgn0001942	eIF-4a	Eukaryotic_initiation_factor_4a	protein_coding	2L	19374	19237	18038	14433	13787	15956	16595	19362.2	17553.3	16281	13586.8	15915.1	16067.8	17191.3	16565.4	-0.276814	0.172397	-1.60567	0.108345	1	-0.225777	0.172409	-1.30954	0.190351	0.956693	0.0510372	0.125523	0.406595	0.684305	1	no	no	no	0
FBgn0001961	Arpc1	Actin-related_protein_2/3_complex,_subunit_1	protein_coding	2L	1453	1662	1284	1207	1355	1325	1307	1452.12	1516.53	1158.93	1136.24	1564.15	1334.29	1353.96	1359.46	-0.175671	0.236492	-0.742819	0.457591	1	-0.0262612	0.236526	-0.111029	0.911594	0.999669	0.14941	0.177343	0.842489	0.399514	1	no	no	no	0
FBgn0001965	Sos	Son_of_sevenless	protein_coding	2L	930	1203	631	553	1002	290	981	929.434	1097.71	569.537	520.58	1156.66	292.033	1016.25	797.457	-0.223012	0.37949	-0.587664	0.556758	1	-0.0911602	0.379501	-0.240211	0.810167	0.999669	0.131852	0.336205	0.392178	0.694927	1	no	no	no	0
FBgn0001967	NimC3	Nimrod_C3	protein_coding	2L	19	50	12	19	31	18	19	18.9884	45.6237	10.8311	17.8861	35.7849	18.1262	19.6827	23.8462	0.0820645	0.347653	0.236053	0.813391	1	0.0752369	0.347441	0.216546	0.828562	0.999669	-0.0068276	0.391201	-0.0174529	0.986075	1	no	no	no	0
FBgn0001970	Pgant35A	Polypeptide_N-acetylgalactosaminyltransferase_35A	protein_coding	2L	30	29	7	6	6	15	9	29.9818	26.4618	6.31817	5.64824	6.92611	15.1051	9.32337	14.2521	-0.226836	0.311891	-0.727292	0.467047	1	-0.304892	0.311467	-0.978891	0.327634	NA	-0.0780562	0.36663	-0.212902	0.831404	NA	no	no	no	0
FBgn0001974	l(2)35Bd	lethal_(2)_35Bd	protein_coding	2L	26	0	27	15	20	0	0	25.9842	0	24.3701	14.1206	23.087	0	0	12.5088	-0.0573153	0.19997	-0.28662	0.774403	1	-0.128088	0.19983	-0.640985	0.521532	NA	-0.070773	0.254209	-0.278404	0.780702	NA	no	no	no	0
FBgn0001977	CIAPIN1	CIAPIN1_ortholog	protein_coding	2L	286	366	437	399	201	497	296	285.826	333.966	394.434	375.608	232.025	500.484	306.635	346.997	0.259114	0.348991	0.742468	0.457804	1	0.18592	0.349167	0.532467	0.594403	0.999669	-0.0731945	0.289741	-0.25262	0.800562	1	no	no	no	0
FBgn0001978	stc	shuttle_craft	protein_coding	2L	313	388	351	342	251	385	237	312.81	354.04	316.811	321.95	289.742	387.698	245.515	318.367	0.0679202	0.324052	0.209597	0.833983	1	-0.0242775	0.32435	-0.0748497	0.940334	0.999669	-0.0921976	0.260622	-0.35376	0.723519	1	no	no	no	0
FBgn0001981	esg	escargot	protein_coding	2L	730	510	934	569	341	432	254	729.556	465.362	843.024	535.642	393.634	435.028	263.126	523.625	-0.136489	0.334662	-0.407842	0.68339	1	-0.78828	0.335153	-2.352	0.0186728	0.468996	-0.651791	0.2734	-2.38402	0.0171247	1	no	no	no	0
FBgn0001983	wor	worniu	protein_coding	2L	0	9	0	0	3	0	52	0	8.21227	0	0	3.46306	0	53.8683	9.36338	-0.0453001	0.174478	-0.259631	NA	NA	0.181456	0.174484	1.03996	NA	NA	0.226756	0.22427	1.01109	NA	NA	no	no	no	0
FBgn0001986	l(2)35Df	lethal_(2)_35Df	protein_coding	2L	502	462	677	571	462	277	360	501.695	421.563	611.057	537.524	533.311	278.942	372.935	465.289	0.0713495	0.332066	0.214865	0.829872	1	-0.281557	0.332415	-0.847003	0.396993	0.999669	-0.352906	0.269896	-1.30757	0.191021	1	no	no	no	0
FBgn0001987	Gli	Gliotactin	protein_coding	2L	412	546	728	386	485	536	445	411.749	498.211	657.089	363.37	559.861	539.757	460.989	498.718	0.226763	0.316411	0.716674	0.473576	1	0.261371	0.316531	0.825737	0.408953	0.999669	0.0346077	0.251884	0.137396	0.890718	1	no	no	no	0
FBgn0001989	l(2)35Di	lethal_(2)_35Di	protein_coding	2L	325	353	365	347	238	254	121	324.802	322.104	329.447	326.657	274.736	255.78	125.347	279.839	0.0472203	0.357532	0.132073	0.894927	1	-0.429222	0.358011	-1.19891	0.230563	0.985812	-0.476442	0.301962	-1.57782	0.114606	1	no	no	no	0
FBgn0001990	wek	weckle	protein_coding	2L	223	203	221	195	161	101	154	222.864	185.232	199.474	183.568	185.851	101.708	159.533	176.89	-0.128325	0.364073	-0.352471	0.724485	1	-0.409374	0.364542	-1.12298	0.261446	0.999669	-0.281049	0.311505	-0.902228	0.366936	1	no	no	no	0
FBgn0001991	Ca-alpha1D	Ca[2+]-channel_protein_alpha[[1]]_subunit_D	protein_coding	2L	0	0	10	0	1	0	0	0	0	9.02595	0	1.15435	0	0	1.45433	0.0855425	0.12167	0.703072	0.482011	1	-0.0236958	0.121358	-0.195255	0.845193	NA	-0.109238	0.15865	-0.688549	0.491107	NA	no	no	no	0
FBgn0001992	Cyp303a1	Cyp303a1	protein_coding	2L	0	0	0	0	0	1	0	?	?	?	?	?	?	?	?	?	?	?	?	?	?	?	?	?	?	?	?	?	?	?	no	no	no	#VALUE!
FBgn0001994	crp	cropped	protein_coding	2L	1642	1580	1351	1446	1056	1388	1420	1641	1441.71	1219.41	1361.23	1219	1397.73	1471.02	1393.01	-0.265396	0.215401	-1.2321	0.217911	1	-0.242843	0.215518	-1.12679	0.259833	0.999669	0.0225525	0.159995	0.140957	0.887904	1	no	no	no	0
FBgn0001995	mRpL4	mitochondrial_ribosomal_protein_L4	protein_coding	2L	64	72	71	84	102	36	126	63.9611	65.6982	64.0843	79.0754	117.744	36.2523	130.527	79.6203	-0.000561629	0.391602	-0.00143418	0.998856	1	0.278184	0.391598	0.710382	0.477468	0.999669	0.278745	0.387227	0.71985	0.471617	1	no	no	no	0
FBgn0002021	l(2)37Bb	lethal_(2)_37Bb	protein_coding	2L	107	101	131	133	117	56	8	106.935	92.16	118.24	125.203	135.059	56.3925	8.28744	91.7538	0.0929727	0.375332	0.247708	0.80436	1	-0.279153	0.375207	-0.743997	0.456878	0.999669	-0.372126	0.399233	-0.932102	0.351284	1	no	no	no	0
FBgn0002022	Catsup	Catecholamines_up	protein_coding	2L	194	177	255	229	272	257	157	193.882	161.508	230.162	215.575	313.984	258.801	162.641	219.508	0.0175173	0.363626	0.048174	0.961578	1	0.242652	0.363618	0.667326	0.504564	0.999669	0.225134	0.309679	0.726992	0.467231	1	no	no	no	0
FBgn0002023	Lim3	Lim3	protein_coding	2L	11	8	1	2	0	2	6	10.9933	7.2998	0.902595	1.88275	0	2.01402	6.21558	4.18686	-0.128117	0.202628	-0.632276	0.527206	1	-0.153936	0.202262	-0.761072	0.446614	NA	-0.0258191	0.256897	-0.100504	0.919944	NA	no	no	no	0
FBgn0002031	l(2)37Cc	lethal_(2)_37Cc	protein_coding	2L	671	605	806	726	547	817	873	670.592	552.047	727.492	683.437	631.431	822.726	904.367	713.156	-0.0412031	0.279011	-0.147675	0.882599	1	0.203212	0.27899	0.728383	0.466379	0.999669	0.244415	0.21489	1.1374	0.255373	1	no	no	no	0
FBgn0002036	CG10561	?	protein_coding	2L	6	7	18	13	38	45	45	5.99635	6.38732	16.2467	12.2379	43.8654	45.3154	46.6168	25.238	-0.077286	0.362968	-0.212928	0.831383	1	0.848784	0.36368	2.33388	0.0196022	0.476713	0.92607	0.397823	2.32784	0.0199204	1	no	no	no	0
FBgn0002044	swm	second_mitotic_wave_missing	protein_coding	2L	1678	1541	1380	1681	1335	1333	1225	1676.98	1406.12	1245.58	1582.45	1541.06	1342.34	1269.01	1437.65	-0.223276	0.223729	-0.997978	0.31829	1	-0.250235	0.223863	-1.1178	0.263651	0.999669	-0.0269582	0.166827	-0.161594	0.871626	1	no	no	no	0
FBgn0002069	Aats-asp	Aspartyl-tRNA_synthetase	protein_coding	2R	1161	1340	1590	1252	1187	1232	1518	1160.29	1222.72	1435.13	1178.6	1370.22	1240.64	1572.54	1311.45	0.12184	0.229023	0.532002	0.594725	1	0.240685	0.229076	1.05068	0.293407	0.999669	0.118844	0.170693	0.696248	0.486274	1	no	no	no	0
FBgn0002121	l(2)gl	lethal_(2)_giant_larvae	protein_coding	2L	814	698	756	668	447	617	596	813.505	636.908	682.362	628.838	515.995	621.325	617.414	645.192	-0.278109	0.251424	-1.10614	0.268667	1	-0.419238	0.251782	-1.66508	0.095897	0.863695	-0.141129	0.190953	-0.739076	0.459861	1	no	no	no	0
FBgn0002174	l(2)tid	lethal_(2)_tumorous_imaginal_discs	protein_coding	2R	70	52	17	33	32	0	35	69.9574	47.4487	15.3441	31.0653	36.9393	0	36.2575	33.8589	-0.206256	0.310011	-0.665317	0.505848	1	-0.302421	0.309823	-0.976109	0.329011	0.999669	-0.0961656	0.365549	-0.263072	0.792495	1	no	no	no	0
FBgn0002183	dre4	dre4	protein_coding	3L	1033	1019	1112	1185	912	896	989	1032.37	929.812	1003.69	1115.53	1052.77	902.28	1024.53	1008.71	-0.0192946	0.228888	-0.0842973	0.93282	1	-0.0510622	0.229071	-0.22291	0.823606	0.999669	-0.0317676	0.170935	-0.185846	0.852566	1	no	no	no	0
FBgn0002283	l(3)73Ah	lethal_(3)_73Ah	protein_coding	3L	161	247	207	182	224	212	276	160.902	225.381	186.837	171.33	258.575	213.486	285.917	214.633	0.165223	0.343061	0.481615	0.63008	1	0.488063	0.342941	1.42317	0.154687	0.934262	0.32284	0.281512	1.14681	0.251461	1	no	no	no	0
FBgn0002284	Prosbeta6	Proteasome_beta6_subunit	protein_coding	3L	760	799	967	993	687	834	724	759.538	729.067	872.809	934.784	793.04	839.846	750.013	811.3	0.138604	0.24541	0.564787	0.572219	1	0.0535821	0.24565	0.218124	0.827333	0.999669	-0.0850223	0.184786	-0.460112	0.645436	1	no	no	no	0
FBgn0002306	sas	stranded_at_second	protein_coding	3R	36	253	647	162	95	142	179	35.9781	230.856	583.979	152.503	109.663	142.995	185.431	205.915	1.4476	0.390977	3.70252	0.000213472	0.0392478	0.623322	0.391199	1.59336	0.111079	0.903259	-0.824277	0.365591	-2.25464	0.0241559	1	yes	no	no	0
FBgn0002354	l(3)87Df	lethal_(3)_87Df	protein_coding	3R	104	60	100	26	63	105	50	103.937	54.7485	90.2595	24.4757	72.7242	105.736	51.7965	71.9539	-0.395315	0.389508	-1.01491	0.310149	1	-0.138517	0.38951	-0.35562	0.722125	0.999669	0.256797	0.39241	0.654411	0.512847	1	no	no	no	0
FBgn0002413	dco	discs_overgrown	protein_coding	3R	952	1032	1047	967	731	1063	977	951.421	941.674	945.017	910.308	843.831	1070.45	1012.1	953.544	-0.0279796	0.232308	-0.120442	0.904133	1	0.0343582	0.232423	0.147826	0.88248	0.999669	0.0623378	0.173712	0.358857	0.719702	1	no	no	no	0
FBgn0002431	hyd	hyperplastic_discs	protein_coding	3R	3759	4065	3979	3840	3279	3738	3315	3756.71	3709.21	3591.43	3614.88	3785.12	3764.2	3434.11	3665.09	-0.0439757	0.160589	-0.27384	0.784207	1	-0.0352614	0.160661	-0.219477	0.826278	0.999669	0.0087143	0.116466	0.0748229	0.940356	1	no	no	no	0
FBgn0002440	l(3)mbn	lethal_(3)_malignant_blood_neoplasm	protein_coding	3L	9	1	0	8	5	0	0	8.99453	0.912475	0	7.53099	5.77176	0	0	3.31568	-0.0660165	0.149558	-0.441411	0.658915	1	-0.091247	0.149371	-0.610876	0.541282	NA	-0.0252306	0.193549	-0.130358	0.896283	NA	no	no	no	0
FBgn0002441	l(3)mbt	lethal_(3)_malignant_brain_tumor	protein_coding	3R	921	1378	899	1313	913	1202	882	920.44	1257.39	811.433	1236.02	1053.92	1210.42	913.69	1057.62	0.218951	0.276927	0.790647	0.42915	1	0.166934	0.277051	0.602537	0.546817	0.999669	-0.0520176	0.212936	-0.244287	0.807009	1	no	no	no	0
FBgn0002466	sti	sticky	protein_coding	3L	632	638	559	324	339	568	507	631.616	582.159	504.551	305.005	391.325	571.981	525.216	501.693	-0.338334	0.330937	-1.02235	0.306615	1	-0.2538	0.331013	-0.766735	0.443239	0.999669	0.0845343	0.268631	0.314686	0.753	1	no	no	no	0
FBgn0002521	pho	pleiohomeotic	protein_coding	4	202	185	238	126	121	71	215	201.877	168.808	214.818	118.613	139.677	71.4976	222.725	162.574	-0.124141	0.38946	-0.318751	0.749915	1	-0.274591	0.389584	-0.70483	0.480916	0.999669	-0.15045	0.359931	-0.417997	0.675949	1	no	no	no	0
FBgn0002522	lab	labial	protein_coding	3R	27	0	0	6	0	0	0	26.9836	0	0	5.64824	0	0	0	4.66169	-0.179763	0.1413	-1.27221	0.2033	1	-0.21739	0.141171	-1.5399	0.123584	NA	-0.0376268	0.183253	-0.205327	0.837316	NA	no	no	no	0
FBgn0002524	lace	lace	protein_coding	2L	345	226	266	352	294	248	246	344.79	206.219	240.09	331.364	339.38	249.738	254.839	280.917	-0.30553	0.341153	-0.895579	0.370477	1	-0.205022	0.341255	-0.600787	0.547982	0.999669	0.100508	0.280766	0.357978	0.72036	1	no	no	no	0
FBgn0002525	Lam	Lamin	protein_coding	2L	6803	6221	6545	6475	4527	5290	5469	6798.86	5676.51	5907.48	6095.39	5225.75	5327.08	5665.5	5813.8	-0.195946	0.150354	-1.30323	0.192497	1	-0.31798	0.150437	-2.11371	0.0345403	0.613557	-0.122034	0.108801	-1.12163	0.26202	1	no	no	no	0
FBgn0002526	LanA	Laminin_A	protein_coding	3L	17297	22140	17451	16441	15840	20143	20608	17286.5	20202.2	15751.2	15477.1	18284.9	20284.2	21348.4	18376.4	-0.0153049	0.186512	-0.0820586	0.9346	1	0.19843	0.186512	1.0639	0.287374	0.999669	0.213735	0.136471	1.56616	0.11731	1	no	no	no	0
FBgn0002531	Lcp1	Larval_cuticle_protein_1	protein_coding	2R	1826	6252	4028	2024	2854	11170	6473	1824.89	5704.79	3635.65	1905.34	3294.52	11248.3	6705.57	4902.72	0.235488	0.391291	0.601823	0.547292	1	0.815158	0.391291	2.08326	0.0372279	0.622686	0.57967	0.388471	1.49219	0.13565	1	no	no	no	0
FBgn0002533	Lcp2	Larval_cuticle_protein_2	protein_coding	2R	369	2317	2320	655	1799	6091	3446	368.776	2114.2	2094.02	616.6	2076.68	6133.69	3569.81	2424.83	0.351485	0.388717	0.904219	0.365879	1	1.13963	0.388718	2.93177	0.00337038	0.164664	0.788146	0.393169	2.0046	0.0450058	1	no	no	no	0
FBgn0002534	Lcp3	Larval_cuticle_protein_3	protein_coding	2R	597	20	0	2	0	20	33	596.637	18.2495	0	1.88275	0	20.1402	34.1857	95.8707	-0.47832	0.19988	-2.39303	0.0167099	0.804823	-0.449537	0.199865	-2.2492	0.0244998	0.528175	0.0287831	0.254192	0.113234	0.909845	1	no	no	no	0
FBgn0002535	Lcp4	Larval_cuticle_protein_4	protein_coding	2R	878	2626	1869	460	1274	6686	2485	877.466	2396.16	1686.95	433.032	1470.64	6732.86	2574.29	2310.2	0.016493	0.36786	0.044835	0.964239	1	0.627715	0.367864	1.70638	0.0879373	0.849508	0.611222	0.398575	1.53352	0.125148	1	no	no	no	0
FBgn0002542	lds	lodestar	protein_coding	3R	513	267	490	362	307	555	337	512.688	243.631	442.272	340.777	354.386	558.89	349.108	400.25	-0.438623	0.343534	-1.2768	0.201673	1	-0.184768	0.343509	-0.537884	0.590657	0.999669	0.253855	0.283513	0.895393	0.370577	1	no	no	no	0
FBgn0002543	lea	leak	protein_coding	2L	1888	2274	2716	1792	1718	2518	1966	1886.85	2074.97	2451.45	1686.94	1983.18	2535.65	2036.64	2093.67	0.116271	0.239423	0.485628	0.627231	1	0.189529	0.239469	0.791456	0.428678	0.999669	0.0732583	0.179621	0.407849	0.683385	1	no	no	no	0
FBgn0002552	lin	lines	protein_coding	2R	999	798	1110	1089	796	825	792	998.392	728.155	1001.88	1025.16	918.864	830.782	820.456	903.384	-0.100412	0.25723	-0.390358	0.696272	1	-0.194392	0.257437	-0.755104	0.450187	0.999669	-0.0939797	0.195514	-0.48068	0.630744	1	no	no	no	0
FBgn0002561	l(1)sc	lethal_of_scute	protein_coding	X	2	17	9	6	3	0	0	1.99878	15.5121	8.12336	5.64824	3.46306	0	0	4.96364	0.212322	0.204399	1.03876	0.298914	1	-0.104265	0.20367	-0.51193	0.6087	NA	-0.316587	0.25917	-1.22154	0.22188	NA	no	no	no	0
FBgn0002562	Lsp1alpha	Larval_serum_protein_1_alpha	protein_coding	X	4066	28011	7333	5848	76219	20133	7444	4063.53	25559.3	6618.73	5505.15	87983.6	20274.1	7711.46	22530.8	-0.01527	0.314068	-0.0486201	0.961222	1	0.512375	0.314068	1.63141	0.102804	0.88506	0.527645	0.369051	1.42974	0.152793	1	no	no	no	0
FBgn0002563	Lsp1beta	Larval_serum_protein_1_beta	protein_coding	2L	38265	163619	57313	67642	457766	67578	140011	38241.7	149298	51730.4	63676.4	528423	68051.7	145042	149209	0.00705705	0.348796	0.0202326	0.983858	1	0.633508	0.348796	1.81627	0.069329	0.79713	0.626451	0.391719	1.59923	0.109769	1	no	no	no	0
FBgn0002564	Lsp1gamma	Larval_serum_protein_1_gamma	protein_coding	3L	28280	74850	27920	44423	233382	41963	69013	28262.8	68298.8	25200.5	41818.6	269405	42257.1	71492.6	78105.1	-0.0447935	0.35978	-0.124502	0.900917	1	0.637498	0.359781	1.77191	0.07641	0.816981	0.682291	0.396382	1.7213	0.085197	1	no	no	no	0
FBgn0002565	Lsp2	Larval_serum_protein_2	protein_coding	3L	53301	143458	64112	238059	329843	81566	161785	53268.6	130902	57867.2	224102	380755	82137.7	167598	156662	0.243524	0.375508	0.64852	0.516648	1	0.564621	0.375508	1.50362	0.132679	0.917137	0.321097	0.399224	0.804303	0.421222	1	no	no	no	0
FBgn0002566	lt	light	protein_coding	2L	224	334	427	358	203	240	286	223.864	304.767	385.408	337.012	234.334	241.682	296.276	289.049	0.492718	0.31919	1.54365	0.122672	1	0.128109	0.319839	0.400544	0.688756	0.999669	-0.364609	0.254715	-1.43144	0.152305	1	no	no	no	0
FBgn0002567	ltd	lightoid	protein_coding	2R	384	520	340	1207	508	323	462	383.766	474.487	306.882	1136.24	586.411	325.264	478.6	527.378	0.470476	0.379358	1.24019	0.214905	1	0.111308	0.379468	0.293326	0.769273	0.999669	-0.359168	0.335878	-1.06934	0.284915	1	no	no	no	0
FBgn0002569	Mal-A2	Maltase_A2	protein_coding	2R	0	0	0	0	0	0	0	?	?	?	?	?	?	?	?	?	?	?	?	?	?	?	?	?	?	?	?	?	?	?	no	no	no	#VALUE!
FBgn0002570	Mal-A1	Maltase_A1	protein_coding	2R	9	0	0	0	0	0	0	8.99453	0	0	0	0	0	0	1.28493	-0.183323	0.12105	-1.51444	0.129914	1	-0.182604	0.120798	-1.51164	0.130625	NA	0	0.157511	0	1	NA	no	no	no	0
FBgn0002571	Mal-A3	Maltase_A3	protein_coding	2R	0	0	0	0	0	0	0	?	?	?	?	?	?	?	?	?	?	?	?	?	?	?	?	?	?	?	?	?	?	?	no	no	no	#VALUE!
FBgn0002573	sens	senseless	protein_coding	3L	0	8	0	0	2	0	0	0	7.2998	0	0	2.3087	0	0	1.37264	0.0670385	0.121485	0.551825	0.581068	1	-0.00538246	0.121198	-0.0444106	0.964577	NA	-0.0724209	0.158437	-0.457096	0.647602	NA	no	no	no	0
FBgn0002576	lz	lozenge	protein_coding	X	12	21	7	0	19	34	14	11.9927	19.162	6.31817	0	21.9327	34.2383	14.503	15.4496	-0.133425	0.27985	-0.476775	0.633522	1	0.209559	0.279983	0.748472	0.454176	0.999669	0.342985	0.339557	1.0101	0.31245	NA	no	no	no	0
FBgn0002577	m	miniature	protein_coding	X	0	0	0	0	2	0	1	0	0	0	0	2.3087	0	1.03593	0.477805	0	0.115139	0	1	NA	0.080149	0.115139	0.696103	0.486364	NA	0.114218	0.150485	0.758998	0.447854	NA	no	no	no	0
FBgn0002578	Kaz-m1	Kazal-type_protease_inhibitor_m1	protein_coding	3R	23	0	4	5	0	0	0	22.986	0	3.61038	4.70687	0	0	0	4.47189	-0.190689	0.162884	-1.1707	0.241717	1	-0.268847	0.162644	-1.65297	0.098336	NA	-0.0781579	0.209704	-0.372706	0.709367	NA	no	no	no	0
FBgn0002579	RpL36	Ribosomal_protein_L36	protein_coding	X	3926	4836	5147	5475	4628	5601	6623	3923.61	4412.73	4645.66	5154.02	5342.34	5640.26	6860.96	5139.94	0.245761	0.191367	1.28424	0.199059	1	0.563683	0.191348	2.94586	0.0032206	0.164441	0.317922	0.140104	2.26918	0.0232572	1	no	no	no	0
FBgn0002590	RpS5a	Ribosomal_protein_S5a	protein_coding	X	8239	8210	9998	9728	7290	8248	9406	8233.99	7491.42	9024.15	9157.68	8415.23	8305.81	9743.95	8624.6	0.051402	0.179521	0.286328	0.774627	1	0.0940298	0.179543	0.523718	0.600475	0.999669	0.0426278	0.130997	0.32541	0.74487	1	no	no	no	0
FBgn0002592	E(spl)m2-BFM	Enhancer_of_split_m2,_Bearded_family_member	protein_coding	3R	70	101	252	59	46	74	24	69.9574	92.16	227.454	55.541	53.1002	74.5187	24.8623	85.3705	0.446809	0.386606	1.15572	0.247795	1	-0.292078	0.3865	-0.7557	0.449829	0.999669	-0.738887	0.395429	-1.86857	0.0616824	1	no	no	no	0
FBgn0002593	RpLP1	Ribosomal_protein_LP1	protein_coding	2L	14731	17987	17082	16121	13742	18706	18482	14722	16412.7	15418.1	15175.9	15863.1	18837.1	19146.1	16510.7	0.082729	0.161085	0.513574	0.60755	1	0.274465	0.161087	1.70384	0.0884118	0.849508	0.191736	0.116762	1.64211	0.100567	1	no	no	no	0
FBgn0002607	RpL19	Ribosomal_protein_L19	protein_coding	2R	6042	7187	7913	7661	6783	7518	8661	6038.33	6557.96	7142.23	7211.86	7829.97	7570.69	8972.19	7331.89	0.192989	0.165342	1.16721	0.243127	1	0.408852	0.165342	2.47277	0.013407	0.395441	0.215864	0.119928	1.79995	0.0718686	1	no	no	no	0
FBgn0002609	E(spl)m3-HLH	Enhancer_of_split_m3,_helix-loop-helix	protein_coding	3R	860	886	744	615	413	430	517	859.477	808.453	671.531	578.945	476.747	433.014	535.576	623.392	-0.252244	0.275694	-0.914942	0.360222	1	-0.722818	0.276298	-2.61608	0.0088946	0.310951	-0.470573	0.21311	-2.20812	0.0272359	1	no	no	no	0
FBgn0002622	RpS3	Ribosomal_protein_S3	protein_coding	3R	18510	25173	19019	20782	16564	24136	25901	18498.7	22969.7	17166.5	19563.6	19120.7	24305.2	26831.6	21208	0.0904964	0.209574	0.43181	0.665879	1	0.316265	0.209574	1.50909	0.131276	0.915396	0.225769	0.154875	1.45775	0.14491	1	no	no	no	0
FBgn0002626	RpL32	Ribosomal_protein_L32	protein_coding	3R	23626	26275	35045	31271	25809	27596	36629	23611.6	23975.3	31631.4	29437.7	29792.7	27789.4	37945.1	29169	0.237796	0.205394	1.15775	0.246965	1	0.39924	0.205396	1.94376	0.0519244	0.727411	0.161444	0.15149	1.06571	0.286556	1	no	no	no	0
FBgn0002629	E(spl)m4-BFM	Enhancer_of_split_m4,_Bearded_family_member	protein_coding	3R	10	51	158	39	11	70	35	9.99392	46.5362	142.61	36.7136	12.6979	70.4906	36.2575	50.7571	0.664684	0.364607	1.82302	0.0683008	1	0.217798	0.364313	0.597831	0.549953	0.999669	-0.446887	0.397971	-1.12291	0.261474	1	no	no	no	0
FBgn0002631	E(spl)m5-HLH	Enhancer_of_split_m5,_helix-loop-helix	protein_coding	3R	0	5	2	13	0	0	0	0	4.56237	1.80519	12.2379	0	0	0	2.65792	0.132754	0.13715	0.967948	0.33307	1	0	0.136837	0	1	NA	-0.185605	0.178161	-1.04178	0.297512	NA	no	no	no	0
FBgn0002632	E(spl)m6-BFM	Enhancer_of_split_m6,_Bearded_family_member	protein_coding	3R	0	0	27	0	0	0	0	0	0	24.3701	0	0	0	0	3.48144	0.106996	0.123824	0.864093	NA	NA	0	0.123665	0	NA	NA	-0.149681	0.161443	-0.927141	NA	NA	no	no	no	0
FBgn0002633	E(spl)m7-HLH	Enhancer_of_split_m7,_helix-loop-helix	protein_coding	3R	11	113	177	102	58	160	120	10.9933	103.11	159.759	96.0201	66.9524	161.121	124.312	103.181	1.19177	0.391364	3.04516	0.00232557	0.258419	1.17285	0.391443	2.99621	0.00273355	0.149402	-0.0189209	0.367837	-0.0514383	0.958976	1	no	no	no	0
FBgn0002638	Rcc1	Regulator_of_chromosome_condensation_1_ortholog_(H._sapiens)	protein_coding	3L	241	273	271	235	243	337	281	240.853	249.106	244.603	221.223	280.508	339.362	291.096	266.679	-0.0323774	0.317122	-0.102097	0.918679	1	0.278181	0.317001	0.877542	0.380192	0.999669	0.310559	0.252528	1.2298	0.218773	1	no	no	no	0
FBgn0002641	mal	maroon-like	protein_coding	X	150	166	117	224	169	132	94	149.909	151.471	105.604	210.868	195.086	132.925	97.3774	149.034	0.0449282	0.384795	0.116759	0.907051	1	-0.0582424	0.384962	-0.151294	0.879744	0.999669	-0.103171	0.347435	-0.296949	0.766505	1	no	no	no	0
FBgn0002643	mam	mastermind	protein_coding	2R	1757	1913	2384	1868	1537	1954	1814	1755.93	1745.56	2151.79	1758.49	1774.24	1967.7	1879.18	1861.84	0.0942164	0.205707	0.458012	0.646944	1	0.0857196	0.205813	0.416492	0.67705	0.999669	-0.00849679	0.151701	-0.0560102	0.955334	1	no	no	no	0
FBgn0002645	Map205	Microtubule-associated_protein_205	protein_coding	3R	4069	3558	3614	2674	2595	3059	3153	4066.53	3246.59	3261.98	2517.23	2995.54	3080.44	3266.29	3204.94	-0.402352	0.198574	-2.02621	0.0427435	1	-0.354371	0.198625	-1.78412	0.0744041	0.81331	0.0479807	0.146279	0.328009	0.742905	1	no	no	no	0
FBgn0002673	twe	twine	protein_coding	2L	63	43	105	78	55	54	69	62.9617	39.2364	94.7725	73.4271	63.4894	54.3785	71.4791	65.6778	0.0722969	0.392508	0.184192	0.853863	1	-0.0123319	0.392565	-0.0314138	0.97494	0.999669	-0.0846288	0.383082	-0.220916	0.825158	1	no	no	no	0
FBgn0002707	mei-9	meiotic_9	protein_coding	X	398	216	227	258	119	231	213	397.758	197.095	204.889	242.874	137.368	232.619	220.653	233.322	-0.62283	0.349912	-1.77996	0.0750817	1	-0.72732	0.350232	-2.07668	0.0378312	0.624698	-0.104489	0.29263	-0.35707	0.721039	1	no	no	no	0
FBgn0002709	mei-218	meiotic_218	protein_coding	X	0	31	0	0	0	0	22	0	28.2867	0	0	0	0	22.7905	7.29674	0.0525792	0.141092	0.372659	0.709402	1	0.0325587	0.141024	0.230874	0.817413	NA	-0.0200206	0.183215	-0.109274	0.912985	NA	no	no	no	0
FBgn0002715	mei-S332	meiotic_from_via_Salaria_332	protein_coding	2R	129	99	156	97	53	169	94	128.922	90.335	140.805	91.3133	61.1807	170.185	97.3774	111.445	-0.132864	0.391894	-0.339031	0.734586	1	-0.11278	0.391958	-0.287735	0.773549	0.999669	0.0200839	0.369466	0.0543593	0.956649	1	no	no	no	0
FBgn0002716	mei-W68	meiotic_W68	protein_coding	2R	23	13	77	42	15	100	12	22.986	11.8622	69.4998	39.5377	17.3153	100.701	12.4312	39.1904	0.130641	0.338801	0.3856	0.699793	1	0.173609	0.338703	0.51257	0.608252	0.999669	0.0429677	0.386341	0.111217	0.911444	1	no	no	no	0
FBgn0002719	Men	Malic_enzyme	protein_coding	3R	577	1280	908	890	2738	668	898	576.649	1167.97	819.556	837.823	3160.62	672.682	930.265	1166.51	0.133109	0.387289	0.343693	0.731077	1	0.576233	0.38729	1.48786	0.136789	0.918778	0.443124	0.394761	1.12251	0.261644	1	no	no	no	0
FBgn0002723	Met	Methoprene-tolerant	protein_coding	X	136	187	166	163	141	150	111	135.917	170.633	149.831	153.444	162.764	151.051	114.988	148.375	0.153666	0.362895	0.423443	0.671972	1	0.0352265	0.363264	0.0969722	0.922748	0.999669	-0.118439	0.308882	-0.383445	0.70139	1	no	no	no	0
FBgn0002732	E(spl)malpha-BFM	Enhancer_of_split_malpha,_Bearded_family_member	protein_coding	3R	177	202	542	120	95	329	223	176.892	184.32	489.207	112.965	109.663	331.306	231.012	233.624	0.275312	0.392767	0.700956	0.48333	1	0.124278	0.392799	0.316392	0.751705	0.999669	-0.151034	0.377951	-0.399613	0.689442	1	no	no	no	0
FBgn0002733	E(spl)mbeta-HLH	Enhancer_of_split_mbeta,_helix-loop-helix	protein_coding	3R	207	337	313	251	187	274	222	206.874	307.504	282.512	236.285	215.864	275.92	229.976	250.705	0.318465	0.330134	0.964652	0.334719	1	0.148325	0.330566	0.448699	0.653649	0.999669	-0.17014	0.266903	-0.637458	0.523826	1	no	no	no	0
FBgn0002734	E(spl)mdelta-HLH	Enhancer_of_split_mdelta,_helix-loop-helix	protein_coding	3R	14	35	178	91	41	30	73	13.9915	31.9366	160.662	85.665	47.3284	30.2103	75.6229	63.6309	0.784307	0.380225	2.06275	0.0391368	1	0.303328	0.380051	0.798124	0.424799	0.999669	-0.480979	0.398411	-1.20724	0.227338	1	no	no	no	0
FBgn0002735	E(spl)mgamma-HLH	Enhancer_of_split_mgamma,_helix-loop-helix	protein_coding	3R	4	29	67	23	14	16	54	3.99757	26.4618	60.4739	21.6516	16.1609	16.1121	55.9402	28.6854	0.473779	0.350934	1.35005	0.177	1	0.340215	0.350657	0.970222	0.331936	0.999669	-0.133564	0.393135	-0.33974	0.734053	1	no	no	no	0
FBgn0002736	mago	mago_nashi	protein_coding	2R	290	347	429	295	185	409	257	289.824	316.629	387.213	277.705	213.555	411.867	266.234	309.004	0.131871	0.349563	0.377247	0.70599	1	0.015621	0.349791	0.044658	0.96438	0.999669	-0.11625	0.290735	-0.39985	0.689267	1	no	no	no	0
FBgn0002772	Mlc1	Myosin_alkali_light_chain_1	protein_coding	3R	87	45	8	17	35	128	371	86.9471	41.0614	7.22076	16.0034	40.4023	128.897	384.33	100.695	-0.757533	0.369911	-2.04788	0.0405718	1	0.631213	0.37024	1.70488	0.0882173	0.849508	1.38875	0.398909	3.48136	0.000498875	0.163935	no	no	no	0
FBgn0002773	Mlc2	Myosin_light_chain_2	protein_coding	3R	94	84	19	17	79	135	397	93.9428	76.6479	17.1493	16.0034	91.1938	135.946	411.264	120.307	-0.64014	0.380406	-1.68278	0.0924175	1	0.668317	0.380587	1.75602	0.0790853	0.829454	1.30846	0.398523	3.28326	0.00102613	0.256337	no	no	no	0
FBgn0002774	mle	maleless	protein_coding	2R	194	254	289	306	168	182	226	193.882	231.769	260.85	288.06	193.931	183.276	234.12	226.555	0.334293	0.334524	0.99931	0.317645	1	0.0285885	0.33514	0.0853031	0.93202	0.999669	-0.305705	0.272222	-1.123	0.261438	1	no	no	no	0
FBgn0002775	msl-3	male-specific_lethal_3	protein_coding	3L	140	179	167	180	194	126	203	139.915	163.333	150.733	169.447	223.944	126.883	210.294	169.221	0.111046	0.366886	0.302671	0.76214	1	0.284355	0.366922	0.774974	0.438355	0.999669	0.173309	0.314382	0.551269	0.581449	1	no	no	no	0
FBgn0002778	mnd	minidiscs	protein_coding	3L	103	299	233	203	220	148	234	102.937	272.83	210.305	191.099	253.957	149.037	242.408	203.225	0.715996	0.363184	1.97144	0.0486735	1	0.663104	0.363392	1.82476	0.0680371	0.795498	-0.0528926	0.307822	-0.171828	0.863572	1	no	no	no	0
FBgn0002780	mod	modulo	protein_coding	3R	4125	3907	4723	3561	2782	4040	3661	4122.49	3565.04	4262.96	3352.23	3211.41	4068.32	3792.54	3767.85	-0.133344	0.204187	-0.653046	0.513727	1	-0.146721	0.204243	-0.718367	0.472531	0.999669	-0.0133778	0.15063	-0.0888122	0.929231	1	no	no	no	0
FBgn0002781	mod(mdg4)	modifier_of_mdg4	protein_coding	3R	7753	7443	7112	7183	5542	7656	6227	7748.28	6791.55	6419.26	6761.89	6397.42	7709.66	6450.73	6896.97	-0.207612	0.168548	-1.23177	0.218037	1	-0.166885	0.168579	-0.98995	0.322198	0.999669	0.0407271	0.122591	0.332219	0.739724	1	no	no	no	0
FBgn0002783	mor	moira	protein_coding	3R	4974	5568	5401	6410	4778	4504	6096	4970.97	5080.66	4874.92	6034.21	5515.5	4535.57	6315.03	5332.41	0.090979	0.209829	0.433586	0.664589	1	0.123214	0.209858	0.587131	0.557116	0.999669	0.0322352	0.155071	0.207874	0.835327	1	no	no	no	0
FBgn0002787	Rpn8	Regulatory_particle_non-ATPase_8	protein_coding	2R	347	305	286	307	224	325	208	346.789	278.305	258.142	289.002	258.575	327.278	215.473	281.938	-0.249555	0.326868	-0.763472	0.445182	1	-0.28654	0.327142	-0.875886	0.381092	0.999669	-0.0369848	0.264397	-0.139883	0.888752	1	no	no	no	0
FBgn0002789	Mp20	Muscle_protein_20	protein_coding	2R	246	200	16	20	116	303	494	245.85	182.495	14.4415	18.8275	133.905	305.124	511.749	201.77	-0.697377	0.374165	-1.86382	0.0623465	1	0.317287	0.374256	0.847779	0.396561	0.999669	1.01466	0.399238	2.5415	0.0110378	1	no	no	no	0
FBgn0002791	mr	morula	protein_coding	2R	118	99	48	54	46	84	100	117.928	90.335	43.3246	50.8342	53.1002	84.5888	103.593	77.672	-0.476195	0.39296	-1.21182	0.225583	1	-0.226699	0.392951	-0.576914	0.563998	0.999669	0.249497	0.380031	0.656516	0.511492	1	no	no	no	0
FBgn0002838	ms(3)K81	male_sterile_(3)_K81	protein_coding	3R	0	0	0	0	0	0	0	?	?	?	?	?	?	?	?	?	?	?	?	?	?	?	?	?	?	?	?	?	?	?	no	no	no	#VALUE!
FBgn0002842	sa	spermatocyte_arrest	protein_coding	3L	0	0	0	0	0	0	0	?	?	?	?	?	?	?	?	?	?	?	?	?	?	?	?	?	?	?	?	?	?	?	no	no	no	#VALUE!
FBgn0002855	Acp26Aa	Accessory_gland_protein_26Aa	protein_coding	2L	0	0	0	0	0	0	0	?	?	?	?	?	?	?	?	?	?	?	?	?	?	?	?	?	?	?	?	?	?	?	no	no	no	#VALUE!
FBgn0002856	Acp26Ab	Accessory_gland_protein_26Ab	protein_coding	2L	0	0	0	0	0	0	0	?	?	?	?	?	?	?	?	?	?	?	?	?	?	?	?	?	?	?	?	?	?	?	no	no	no	#VALUE!
FBgn0002862	Mst87F	Male-specific_RNA_87F	protein_coding	3R	0	9	14	11	0	0	0	0	8.21227	12.6363	10.3551	0	0	0	4.45767	0.222505	0.173573	1.28191	0.199876	1	0	0.173061	0	1	NA	-0.310947	0.222901	-1.395	0.163016	NA	no	no	no	0
FBgn0002863	Acp95EF	Accessory_gland_protein_95EF	protein_coding	3R	1	0	0	0	0	0	0	?	?	?	?	?	?	?	?	?	?	?	?	?	?	?	?	?	?	?	?	?	?	?	no	no	no	#VALUE!
FBgn0002865	Mst98Ca	Male-specific_RNA_98Ca	protein_coding	3R	0	6	0	8	0	0	0	0	5.47485	0	7.53099	0	0	0	1.85798	0.104151	0.122421	0.850754	0.394906	1	0	0.122139	0	1	NA	-0.145613	0.159608	-0.912315	0.361603	NA	no	no	no	0
FBgn0002868	MtnA	Metallothionein_A	protein_coding	3R	199	333	270	415	1493	249	380	198.879	303.854	243.701	390.67	1723.45	250.745	393.653	500.707	0.105449	0.392544	0.268631	0.788214	1	1.02282	0.392502	2.6059	0.00916329	0.314674	0.917372	0.3739	2.45352	0.0141464	1	no	no	no	0
FBgn0002869	MtnB	Metallothionein_B	protein_coding	3R	3	0	0	0	0	16	0	2.99818	0	0	0	0	16.1121	0	2.73005	-0.0668378	0.123358	-0.54182	0.587943	1	0.0582024	0.12331	0.472002	0.636925	NA	0.12504	0.160905	0.777107	0.437096	NA	no	no	no	0
FBgn0002872	mu2	mutator_2	protein_coding	3L	741	636	609	857	605	437	365	740.549	580.334	549.68	806.757	698.383	440.063	378.114	599.126	-0.129211	0.325286	-0.397222	0.691204	1	-0.438667	0.325564	-1.34741	0.17785	0.949948	-0.309456	0.262368	-1.17948	0.238209	1	no	no	no	0
FBgn0002873	mud	mushroom_body_defect	protein_coding	X	880	1028	924	933	695	897	1048	879.465	938.024	833.998	878.302	802.275	903.287	1085.65	903.001	0.00314981	0.246951	0.0127548	0.989823	1	0.0738378	0.247053	0.298874	0.765036	0.999669	0.070688	0.186169	0.379698	0.70417	1	no	no	no	0
FBgn0002878	mus101	mutagen-sensitive_101	protein_coding	X	180	166	191	135	121	183	163	179.891	151.471	172.396	127.085	139.677	184.283	168.857	160.523	-0.183368	0.359668	-0.509825	0.610174	1	-0.0776663	0.35979	-0.215866	0.829092	0.999669	0.105702	0.304649	0.346963	0.728619	1	no	no	no	0
FBgn0002887	mus201	mutagen-sensitive_201	protein_coding	2L	217	175	298	196	176	329	220	216.868	159.683	268.973	184.509	203.166	331.306	227.905	227.487	-0.0813428	0.362166	-0.224601	0.82229	1	0.176391	0.362133	0.487088	0.626196	0.999669	0.257734	0.307691	0.837638	0.402234	1	no	no	no	0
FBgn0002891	mus205	mutagen-sensitive_205	protein_coding	2R	391	575	786	665	431	465	404	390.762	524.673	709.44	626.014	497.526	468.259	418.516	519.313	0.571144	0.281257	2.03069	0.0422869	1	0.178327	0.281813	0.632785	0.526874	0.999669	-0.392816	0.216572	-1.81379	0.0697103	1	no	no	no	0
FBgn0002899	mus301	mutagen-sensitive_301	protein_coding	3L	136	133	189	110	96	106	108	135.917	121.359	170.59	103.551	110.818	106.743	111.88	122.98	-0.00368574	0.376587	-0.00978721	0.992191	1	-0.208831	0.376979	-0.553958	0.579607	0.999669	-0.205145	0.331345	-0.619128	0.535832	1	no	no	no	0
FBgn0002901	mus304	mutagen-sensitive_304	protein_coding	3L	182	167	236	241	116	110	226	181.889	152.383	213.012	226.871	133.905	110.771	234.12	178.993	0.0983338	0.377362	0.260582	0.794415	1	-0.139687	0.377643	-0.369892	0.711463	0.999669	-0.238021	0.332466	-0.715924	0.474038	1	no	no	no	0
FBgn0002905	mus308	mutagen-sensitive_308	protein_coding	3R	243	208	457	261	190	159	125	242.852	189.795	412.486	245.699	219.327	160.114	129.491	228.538	0.199532	0.373361	0.53442	0.593051	1	-0.381392	0.373819	-1.02026	0.307606	0.999669	-0.580923	0.32573	-1.78345	0.0745133	1	no	no	no	0
FBgn0002906	Blm	Bloom_syndrome_helicase_ortholog	protein_coding	3R	732	790	597	745	514	699	542	731.555	720.855	538.849	701.323	593.337	703.899	561.474	650.185	-0.133706	0.273492	-0.488883	0.624924	1	-0.204922	0.273724	-0.748647	0.45407	0.999669	-0.0712169	0.21031	-0.338628	0.73489	1	no	no	no	0
FBgn0002909	mus312	mutagen-sensitive_312	protein_coding	3L	0	0	0	0	0	0	0	?	?	?	?	?	?	?	?	?	?	?	?	?	?	?	?	?	?	?	?	?	?	?	no	no	no	#VALUE!
FBgn0002914	Myb	Myb_oncogene-like	protein_coding	X	1634	1598	1616	1454	911	1264	1221	1633.01	1458.13	1458.59	1368.76	1051.61	1272.86	1264.87	1358.26	-0.169948	0.211283	-0.804364	0.421187	1	-0.41504	0.211584	-1.96158	0.0498115	0.711947	-0.245091	0.156795	-1.56313	0.118022	1	no	no	no	0
FBgn0002917	na	narrow_abdomen	protein_coding	X	2	14	13	8	0	3	1	1.99878	12.7746	11.7337	7.53099	0	3.02103	1.03593	5.44216	0.286438	0.233148	1.22857	0.219235	1	-0.130499	0.231976	-0.562554	0.573739	NA	-0.416937	0.291283	-1.43138	0.152321	NA	no	no	no	0
FBgn0002921	Atpalpha	Na_pump_alpha_subunit	protein_coding	3R	19300	25302	20913	22688	23303	21404	21072	19288.3	23087.4	18876	21357.9	26899.9	21554	21829.1	21841.8	0.118952	0.181924	0.653853	0.513207	1	0.265126	0.181928	1.45731	0.14503	0.924298	0.146174	0.132866	1.10016	0.271262	1	no	no	no	0
FBgn0002922	nau	nautilus	protein_coding	3R	65	96	22	31	63	14	78	64.9605	87.5976	19.8571	29.1826	72.7242	14.0981	80.8025	52.7461	-0.165363	0.363389	-0.455058	0.649068	1	-0.0342918	0.363354	-0.0943758	0.924811	0.999669	0.131071	0.397481	0.329755	0.741585	1	no	no	no	0
FBgn0002924	ncd	non-claret_disjunctional	protein_coding	3R	755	414	839	763	362	793	608	754.541	377.765	757.277	718.268	417.876	798.558	629.845	636.304	-0.205986	0.344169	-0.598504	0.549504	1	-0.210216	0.344252	-0.610646	0.541434	0.999669	-0.00422933	0.28414	-0.0148847	0.988124	1	no	no	no	0
FBgn0002926	ndl	nudel	protein_coding	3L	24	114	36	98	92	85	68	23.9854	104.022	32.4934	92.2546	106.2	85.5958	70.4432	73.5707	0.53259	0.391027	1.36203	0.173189	1	0.658003	0.391031	1.68274	0.0924262	0.85599	0.125413	0.387618	0.323548	0.74628	1	no	no	no	0
FBgn0002930	nec	necrotic	protein_coding	2R	99	215	110	515	748	93	349	98.9398	196.182	99.2855	484.807	863.455	93.6518	361.539	313.98	0.31395	0.388274	0.808579	0.418757	1	0.770813	0.388278	1.98521	0.0471215	0.692632	0.456863	0.393577	1.1608	0.245725	1	no	no	no	0
FBgn0002931	net	net	protein_coding	2L	19	23	17	5	9	14	60	18.9884	20.9869	15.3441	4.70687	10.3892	14.0981	62.1558	20.9528	-0.156591	0.3219	-0.486458	0.626643	1	0.195045	0.322042	0.605652	0.544746	0.999669	0.351636	0.375062	0.937542	0.34848	1	no	no	no	0
FBgn0002932	neur	neuralized	protein_coding	3R	372	527	605	473	431	529	407	371.774	480.874	546.07	445.27	497.526	532.708	421.623	470.835	0.331277	0.283399	1.16894	0.242426	1	0.312653	0.283627	1.10234	0.270315	0.999669	-0.0186244	0.218466	-0.0852506	0.932062	1	no	no	no	0
FBgn0002933	ng1	new_glue_1	protein_coding	X	0	0	0	0	0	0	13	0	0	0	0	0	0	13.4671	1.92387	0	0.122404	0	1	1	0.104818	0.122353	0.856688	0.391617	NA	0.146852	0.159746	0.919288	0.357945	NA	no	no	no	0
FBgn0002936	ninaA	neither_inactivation_nor_afterpotential_A	protein_coding	2L	0	0	0	0	0	0	0	?	?	?	?	?	?	?	?	?	?	?	?	?	?	?	?	?	?	?	?	?	?	?	no	no	no	#VALUE!
FBgn0002937	ninaB	neither_inactivation_nor_afterpotential_B	protein_coding	3R	0	0	0	0	0	0	0	?	?	?	?	?	?	?	?	?	?	?	?	?	?	?	?	?	?	?	?	?	?	?	no	no	no	#VALUE!
FBgn0002938	ninaC	neither_inactivation_nor_afterpotential_C	protein_coding	2L	0	0	0	1	0	0	0	?	?	?	?	?	?	?	?	?	?	?	?	?	?	?	?	?	?	?	?	?	?	?	no	no	no	#VALUE!
FBgn0002939	ninaD	neither_inactivation_nor_afterpotential_D	protein_coding	2L	0	2	0	0	9	0	0	0	1.82495	0	0	10.3892	0	0	1.74487	-0.0185967	0.122187	-0.152199	0.87903	1	0.0811185	0.122093	0.664398	0.506436	NA	0.0997151	0.159447	0.625383	0.53172	NA	no	no	no	0
FBgn0002940	ninaE	neither_inactivation_nor_afterpotential_E	protein_coding	3R	0	0	6	71	0	0	10	0	0	5.41557	66.8375	0	0	10.3593	11.8018	0.204174	0.184294	1.10787	0.267918	1	-0.0500765	0.184095	-0.272015	0.785611	NA	-0.254251	0.23588	-1.07788	0.281086	NA	no	no	no	0
FBgn0002941	slou	slouch	protein_coding	3R	0	1	4	0	0	0	0	0	0.912475	3.61038	0	0	0	0	0.646122	0.0943357	0.117332	0.804009	0.421392	NA	0	0.11666	0	1	NA	-0.131628	0.15296	-0.860539	0.389492	NA	no	no	no	0
FBgn0002945	nkd	naked_cuticle	protein_coding	3L	197	210	733	282	143	293	88	196.88	191.62	661.602	265.467	165.072	295.054	91.1618	266.694	0.549542	0.392034	1.40177	0.160983	1	-0.154521	0.392157	-0.394027	0.693561	0.999669	-0.704062	0.370556	-1.90002	0.0574309	1	no	no	no	0
FBgn0002948	nod	no_distributive_disjunction	protein_coding	X	146	53	125	70	84	121	41	145.911	48.3612	112.824	65.8962	96.9656	121.848	42.4731	90.6114	-0.447773	0.3925	-1.14082	0.253943	1	-0.321973	0.39251	-0.820292	0.41205	0.999669	0.1258	0.384659	0.327043	0.743635	1	no	no	no	0
FBgn0002962	nos	nanos	protein_coding	3R	320	387	499	414	372	520	548	319.805	353.128	450.395	389.729	429.419	523.645	567.689	433.401	0.234787	0.295669	0.794088	0.427144	1	0.553358	0.295569	1.87218	0.0611824	0.770347	0.31857	0.229972	1.38526	0.165974	1	no	no	no	0
FBgn0002973	numb	numb	protein_coding	2L	224	256	562	201	213	219	193	223.864	233.594	507.258	189.216	245.877	220.535	199.934	260.04	0.326558	0.376112	0.868248	0.385259	1	-0.0504588	0.376375	-0.134065	0.893351	0.999669	-0.377017	0.330033	-1.14236	0.253303	1	no	no	no	0
FBgn0002985	odd	odd_skipped	protein_coding	2L	3664	4017	3551	4089	2820	3719	3730	3661.77	3665.41	3205.12	3849.28	3255.27	3745.07	3864.02	3606.56	-0.0332851	0.1874	-0.177616	0.859025	1	-0.0144041	0.187456	-0.0768398	0.938751	0.999669	0.0188811	0.137212	0.137605	0.890553	1	no	no	no	0
FBgn0002989	okr	okra	protein_coding	2L	54	85	83	155	58	53	97	53.9672	77.5604	74.9154	145.913	66.9524	53.3715	100.485	81.8807	0.435067	0.392595	1.10818	0.267783	1	0.143054	0.392732	0.364253	0.715669	0.999669	-0.292014	0.377011	-0.77455	0.438606	1	no	no	no	0
FBgn0003002	opa	odd_paired	protein_coding	3R	0	81	86	1	0	55	25	0	73.9105	77.6232	0.941374	0	55.3855	25.8982	33.3941	0.296424	0.264956	1.11877	0.26324	1	0.0852456	0.264784	0.321944	0.747495	0.999669	-0.211178	0.325009	-0.64976	0.515847	1	no	no	no	0
FBgn0003008	or	orange	protein_coding	2R	90	110	107	109	77	91	29	89.9453	100.372	96.5777	102.61	88.8851	91.6378	30.042	85.7243	0.120653	0.392769	0.307186	0.758702	1	-0.21103	0.392884	-0.53713	0.591178	0.999669	-0.331683	0.380008	-0.872832	0.382755	1	no	no	no	0
FBgn0003009	ord	orientation_disruptor	protein_coding	2R	473	548	577	598	291	496	493	472.712	500.036	520.797	562.941	335.917	499.477	510.713	486.085	0.139895	0.299064	0.467774	0.639946	1	-0.0716553	0.299422	-0.239312	0.810864	0.999669	-0.21155	0.234517	-0.902066	0.367022	1	no	no	no	0
FBgn0003011	ort	ora_transientless	protein_coding	3R	0	0	7	0	0	0	0	0	0	6.31817	0	0	0	0	0.902595	0.0983383	0.119456	0.823219	0.410383	NA	0	0.118935	0	1	NA	-0.137323	0.155733	-0.881782	0.377895	NA	no	no	no	0
FBgn0003015	osk	oskar	protein_coding	3R	4	2	3	2	8	12	0	3.99757	1.82495	2.70779	1.88275	9.23482	12.0841	0	4.53314	-0.0941607	0.209835	-0.448737	0.653622	1	0.111862	0.209823	0.533127	0.593946	NA	0.206023	0.265772	0.775186	0.43823	NA	no	no	no	0
FBgn0003016	osp	outspread	protein_coding	2L	1963	1576	1319	1698	877	1166	1214	1961.81	1438.06	1190.52	1598.45	1012.37	1174.17	1257.62	1376.14	-0.416365	0.235032	-1.77152	0.0764739	1	-0.6961	0.235308	-2.95825	0.00309394	0.162654	-0.279735	0.176689	-1.58321	0.113374	1	no	no	no	0
FBgn0003023	otu	ovarian_tumor	protein_coding	X	774	899	1010	1037	835	974	803	773.529	820.315	911.621	976.205	963.884	980.827	831.852	894.033	0.196228	0.236347	0.830255	0.406394	1	0.230334	0.236486	0.973985	0.330064	0.999669	0.0341057	0.176749	0.192961	0.846989	1	no	no	no	0
FBgn0003028	ovo	ovo	protein_coding	X	3776	6490	6216	5125	5149	6033	5394	3773.7	5921.96	5610.53	4824.54	5943.76	6075.29	5587.8	5391.08	0.49804	0.173702	2.86721	0.00414102	0.367316	0.601517	0.173724	3.46248	0.000535217	0.046477	0.103477	0.126196	0.819969	0.412234	1	no	yes	no	1
FBgn0003034	SP	Sex_Peptide	protein_coding	3L	0	0	0	0	0	0	0	?	?	?	?	?	?	?	?	?	?	?	?	?	?	?	?	?	?	?	?	?	?	?	no	no	no	#VALUE!
FBgn0003041	pbl	pebble	protein_coding	3L	1346	1236	1138	1033	1052	1309	1160	1345.18	1127.82	1027.15	972.439	1214.38	1318.17	1201.68	1172.4	-0.341293	0.212122	-1.60895	0.107628	1	-0.0957702	0.212098	-0.451537	0.651602	0.999669	0.245523	0.157269	1.56116	0.118486	1	no	no	no	0
FBgn0003042	Pc	Polycomb	protein_coding	3L	650	745	753	735	460	810	464	649.605	679.794	679.654	691.91	531.002	815.677	480.671	646.902	0.0679632	0.298069	0.228012	0.819637	1	-0.0827238	0.298303	-0.277315	0.781538	0.999669	-0.150687	0.233535	-0.645243	0.51877	1	no	no	no	0
FBgn0003044	Pcl	Polycomblike	protein_coding	2R	3891	4020	4267	4236	3327	3791	3315	3888.63	3668.15	3851.37	3987.66	3840.53	3817.57	3434.11	3784	-0.0179621	0.165475	-0.108548	0.913561	1	-0.0697484	0.165562	-0.421282	0.673549	0.999669	-0.0517863	0.120213	-0.430788	0.666623	1	no	no	no	0
FBgn0003046	Pcp	Pupal_cuticle_protein	protein_coding	2L	137	80	138	135	104	68	169	136.917	72.998	124.558	127.085	120.053	68.4766	175.072	117.88	-0.18863	0.391014	-0.482412	0.629514	1	-0.0744168	0.391052	-0.190299	0.849075	0.999669	0.114213	0.365323	0.312635	0.754558	1	no	no	no	0
FBgn0003048	pcx	pecanex	protein_coding	X	544	561	548	504	503	589	626	543.669	511.898	494.622	474.452	580.639	593.128	648.492	549.557	-0.131191	0.255287	-0.513894	0.607326	1	0.149346	0.255213	0.585181	0.558426	0.999669	0.280536	0.193411	1.45047	0.146928	1	no	no	no	0
FBgn0003053	peb	pebbled	protein_coding	X	72	42	42	21	64	47	62	71.9562	38.3239	37.909	19.7688	73.8785	47.3294	64.2276	50.4848	-0.561948	0.390421	-1.43934	0.150055	1	-0.00504419	0.390427	-0.0129197	0.989692	0.999822	0.556904	0.391118	1.42388	0.154482	1	no	no	no	0
FBgn0003057	CG10598	?	protein_coding	X	0	0	0	0	0	0	0	?	?	?	?	?	?	?	?	?	?	?	?	?	?	?	?	?	?	?	?	?	?	?	no	no	no	#VALUE!
FBgn0003060	CG9757	?	protein_coding	3R	0	0	0	6	0	0	0	0	0	0	5.64824	0	0	0	0.806892	0.0970533	0.118781	0.817075	0.413885	NA	0	0.118211	0	1	NA	-0.135493	0.154852	-0.874983	0.381583	NA	no	no	no	0
FBgn0003062	Fib	Fibrillarin	protein_coding	2R	1044	842	851	954	684	637	779	1043.37	768.304	768.108	898.071	789.577	641.465	806.989	816.554	-0.313109	0.248685	-1.25906	0.208009	1	-0.427358	0.248954	-1.71661	0.0860496	0.846427	-0.114249	0.188418	-0.606356	0.544279	1	no	no	no	0
FBgn0003065	CG2150	?	protein_coding	3R	11	8	0	0	8	35	0	10.9933	7.2998	0	0	9.23482	35.2453	0	8.96761	-0.133366	0.1925	-0.69281	0.488429	1	0.0882694	0.192505	0.458531	0.646571	NA	0.221635	0.245632	0.902306	0.366895	NA	no	no	no	0
FBgn0003067	Pepck	Phosphoenolpyruvate_carboxykinase	protein_coding	2R	0	0	0	0	0	0	0	?	?	?	?	?	?	?	?	?	?	?	?	?	?	?	?	?	?	?	?	?	?	?	no	no	no	#VALUE!
FBgn0003068	per	period	protein_coding	X	32	42	41	39	59	32	8	31.9805	38.3239	37.0064	36.7136	68.1068	32.2243	8.28744	36.0919	0.0599074	0.360305	0.166269	0.867946	1	0.0387646	0.360159	0.107632	0.914288	0.999669	-0.0211428	0.396571	-0.053314	0.957482	1	no	no	no	0
FBgn0003071	Pfk	Phosphofructokinase	protein_coding	2R	502	496	555	504	323	640	359	501.695	452.588	500.94	474.452	372.856	644.486	371.899	474.131	-0.0554715	0.321917	-0.172316	0.863189	1	-0.0899149	0.322085	-0.279165	0.780118	0.999669	-0.0344435	0.25837	-0.133311	0.893947	1	no	no	no	0
FBgn0003074	Pgi	Phosphoglucose_isomerase	protein_coding	2R	787	1025	1139	1043	1036	1013	1274	786.521	935.287	1028.06	981.853	1195.91	1020.1	1319.77	1038.21	0.276299	0.23282	1.18675	0.235326	1	0.526849	0.232795	2.26315	0.0236265	0.516053	0.25055	0.173388	1.44503	0.14845	1	no	no	no	0
FBgn0003076	Pgm	phosphoglucose_mutase	protein_coding	3L	419	577	493	299	508	412	626	418.745	526.498	444.979	281.471	586.411	414.888	648.492	474.498	-0.0293239	0.335039	-0.0875238	0.930255	1	0.314057	0.334966	0.937577	0.348462	0.999669	0.343381	0.272716	1.25912	0.207988	1	no	no	no	0
FBgn0003079	phl	pole_hole	protein_coding	X	482	402	527	538	228	419	230	481.707	366.815	475.668	506.459	263.192	421.937	238.264	393.434	-0.0386323	0.334777	-0.115397	0.90813	1	-0.509838	0.335272	-1.52067	0.128343	0.909928	-0.471205	0.273415	-1.72341	0.0848148	1	no	no	no	0
FBgn0003082	phr	photorepair	protein_coding	2R	93	43	58	21	0	9	30	92.9434	39.2364	52.3505	19.7688	0	9.06308	31.0779	34.92	-0.242043	0.319549	-0.757452	0.448779	1	-0.625141	0.319142	-1.95882	0.0501339	0.713925	-0.383097	0.372665	-1.02799	0.303952	1	no	no	no	0
FBgn0003086	Pig1	Pre-intermoult_gene_1	protein_coding	X	0	0	0	0	0	0	0	?	?	?	?	?	?	?	?	?	?	?	?	?	?	?	?	?	?	?	?	?	?	?	no	no	no	#VALUE!
FBgn0003087	pim	pimples	protein_coding	2L	267	241	246	191	131	218	185	266.838	219.906	222.038	179.802	151.22	219.528	191.647	207.283	-0.250217	0.345882	-0.723418	0.469423	1	-0.371823	0.346265	-1.07381	0.282908	0.999669	-0.121606	0.28703	-0.42367	0.671807	1	no	no	no	0
FBgn0003089	pip	pipe	protein_coding	3L	4	9	77	8	0	0	0	3.99757	8.21227	69.4998	7.53099	0	0	0	12.7487	0.44506	0.249657	1.78269	NA	NA	-0.255665	0.248649	-1.02822	NA	NA	-0.700725	0.308888	-2.26854	NA	NA	no	no	no	0
FBgn0003090	pk	prickle	protein_coding	2R	692	846	984	693	708	667	695	691.579	771.954	888.154	652.372	817.281	671.675	719.971	744.712	0.136528	0.26272	0.519671	0.603293	1	0.0744647	0.262929	0.283212	0.777014	0.999669	-0.0620632	0.200013	-0.310296	0.756336	1	no	no	no	0
FBgn0003091	Pkc53E	Protein_C_kinase_53E	protein_coding	2R	122	60	27	58	6	1	2	121.926	54.7485	24.3701	54.5997	6.92611	1.00701	2.07186	37.9499	-0.379511	0.365955	-1.03704	0.299716	1	-1.55901	0.364643	-4.27545	1.90748e-05	0.00411222	-1.1795	0.397397	-2.96807	0.00299676	0.552428	no	yes	no	1
FBgn0003093	Pkc98E	Protein_C_kinase_98E	protein_coding	3R	3001	2901	3795	2316	1826	2561	2721	2999.17	2647.09	3425.35	2180.22	2107.85	2578.95	2818.76	2679.63	-0.104351	0.24809	-0.420618	0.674034	1	-0.233145	0.248174	-0.939443	0.347503	0.999669	-0.128794	0.187318	-0.687572	0.491723	1	no	no	no	0
FBgn0003114	plu	plutonium	protein_coding	2R	14	0	0	6	0	3	0	13.9915	0	0	5.64824	0	3.02103	0	3.23725	-0.113338	0.135489	-0.836514	0.402866	1	-0.134621	0.135344	-0.994658	0.319903	NA	-0.0212829	0.176012	-0.120917	0.903757	NA	no	no	no	0
FBgn0003116	pn	prune	protein_coding	X	53	103	89	74	118	63	106	52.9678	93.9849	80.331	69.6617	136.214	63.4416	109.809	86.6299	0.247813	0.391426	0.633103	0.526666	1	0.488408	0.391414	1.2478	0.212103	0.973953	0.240595	0.367116	0.655364	0.512234	1	no	no	no	0
FBgn0003117	pnr	pannier	protein_coding	3R	103	159	115	24	168	143	52	102.937	145.084	103.798	22.593	193.931	144.002	53.8683	109.459	-0.117821	0.384393	-0.306512	0.759215	1	0.175268	0.384402	0.455949	0.648427	0.999669	0.293089	0.396915	0.738417	0.460261	1	no	no	no	0
FBgn0003118	pnt	pointed	protein_coding	3R	1633	3574	2242	1981	2926	1524	3064	1632.01	3261.19	2023.62	1864.86	3377.63	1534.68	3174.09	2409.73	0.400231	0.321989	1.243	0.213869	1	0.556944	0.321996	1.72966	0.083691	0.84145	0.156713	0.258092	0.607199	0.543719	1	no	no	no	0
FBgn0003124	polo	polo	protein_coding	3L	5321	6291	5757	5405	4195	5396	5657	5317.76	5740.38	5196.24	5088.12	4842.51	5433.82	5860.25	5354.16	0.00591389	0.174099	0.0339685	0.972902	1	0.0157659	0.174143	0.0905342	0.927863	0.999669	0.009852	0.126808	0.0776925	0.938073	1	no	no	no	0
FBgn0003129	Poxm	Pox_meso	protein_coding	3R	11	33	53	99	23	0	9	10.9933	30.1117	47.8375	93.196	26.5501	0	9.32337	31.1446	0.51805	0.312768	1.65634	0.0976537	1	-0.168484	0.312115	-0.539814	0.589325	0.999669	-0.686533	0.367922	-1.86597	0.0620451	1	no	no	no	0
FBgn0003130	Poxn	Pox_neuro	protein_coding	2R	0	0	15	1	0	0	0	0	0	13.5389	0.941374	0	0	0	2.06861	0.104762	0.122725	0.853628	0.393311	1	0	0.122469	0	1	NA	-0.146486	0.160006	-0.915507	0.359926	NA	no	no	no	0
FBgn0003132	Pp1-13C	Protein_phosphatase_1_at_13C	protein_coding	X	0	0	0	0	0	0	0	?	?	?	?	?	?	?	?	?	?	?	?	?	?	?	?	?	?	?	?	?	?	?	no	no	no	#VALUE!
FBgn0003134	Pp1alpha-96A	Protein_phosphatase_1alpha_at_96A	protein_coding	3R	836	1401	1103	868	809	787	1069	835.492	1278.38	995.562	817.112	933.871	792.516	1107.41	965.763	0.256782	0.280513	0.9154	0.359982	1	0.141248	0.280677	0.50324	0.614796	0.999669	-0.115534	0.216293	-0.534155	0.593234	1	no	no	no	0
FBgn0003137	Ppn	Papilin	protein_coding	3R	8341	6862	6125	5108	5750	6771	6236	8335.93	6261.4	5528.39	4808.54	6637.53	6818.46	6460.06	6407.19	-0.559262	0.179352	-3.11824	0.00181937	0.214568	-0.303691	0.179344	-1.69334	0.0903912	0.85425	0.255571	0.13102	1.95062	0.0511017	1	no	no	no	0
FBgn0003139	PpV	Protein_phosphatase_V	protein_coding	X	1837	3014	2918	2501	2100	2395	2372	1835.88	2750.2	2633.77	2354.38	2424.14	2411.79	2457.23	2409.63	0.461095	0.18019	2.55894	0.0104992	0.635737	0.377915	0.18032	2.0958	0.0360998	0.616052	-0.0831796	0.13111	-0.634424	0.525804	1	no	no	no	0
FBgn0003140	PpY-55A	Protein_phosphatase_Y_at_55A	protein_coding	2R	0	0	0	0	0	0	0	?	?	?	?	?	?	?	?	?	?	?	?	?	?	?	?	?	?	?	?	?	?	?	no	no	no	#VALUE!
FBgn0003141	pr	purple	protein_coding	2L	787	1387	1291	882	1510	1186	1795	786.521	1265.6	1165.25	830.292	1743.07	1194.31	1859.49	1263.51	0.35665	0.283974	1.25592	0.209143	1	0.868114	0.283866	3.05818	0.00222684	0.128974	0.511464	0.219044	2.33498	0.0195445	1	no	no	no	0
FBgn0003145	prd	paired	protein_coding	2L	0	0	0	0	0	0	0	?	?	?	?	?	?	?	?	?	?	?	?	?	?	?	?	?	?	?	?	?	?	?	no	no	no	#VALUE!
FBgn0003149	Prm	Paramyosin	protein_coding	3L	499	172	46	55	171	394	502	498.696	156.946	41.5194	51.7756	197.394	396.762	520.037	266.161	-1.48441	0.392147	-3.78534	0.000153497	0.0292862	-0.0539628	0.391919	-0.137689	0.890487	0.999669	1.43045	0.369908	3.86704	0.000110166	0.0456366	yes	no	yes	0
FBgn0003159	ptr	proximal_to_raf	protein_coding	X	679	581	512	596	525	592	482	678.587	530.148	462.129	561.059	606.035	596.149	499.318	561.918	-0.337039	0.268095	-1.25716	0.208695	1	-0.215063	0.268187	-0.801915	0.422602	0.999669	0.121976	0.205555	0.593397	0.552916	1	no	no	no	0
FBgn0003162	Pu	Punch	protein_coding	2R	121	139	197	408	138	91	242	120.926	126.834	177.811	384.08	159.301	91.6378	250.695	187.327	0.483081	0.391803	1.23297	0.217587	1	0.164152	0.391905	0.418857	0.675321	0.999669	-0.318929	0.369242	-0.863741	0.38773	1	no	no	no	0
FBgn0003165	pum	pumilio	protein_coding	3R	4223	6494	5959	5034	4537	4926	5162	4220.43	5925.61	5378.56	4738.88	5237.3	4960.53	5347.47	5115.54	0.321769	0.176154	1.82664	0.0677543	1	0.277452	0.176209	1.57456	0.115358	0.909928	-0.0443167	0.128254	-0.345538	0.72969	1	no	no	no	0
FBgn0003169	put	punt	protein_coding	3R	1115	955	1020	966	787	991	853	1114.32	871.414	920.647	909.367	908.475	997.946	883.648	943.688	-0.279416	0.218971	-1.27604	0.201942	1	-0.234736	0.21912	-1.07126	0.284051	0.999669	0.0446804	0.163076	0.273984	0.784097	1	no	no	no	0
FBgn0003174	pwn	pawn	protein_coding	2R	400	220	407	296	143	571	140	399.757	200.744	367.356	278.647	165.072	575.002	145.03	304.516	-0.267205	0.390703	-0.683909	0.494032	1	-0.221956	0.390729	-0.568056	0.569997	0.999669	0.0452493	0.364066	0.124289	0.901087	1	no	no	no	0
FBgn0003175	px	plexus	protein_coding	2R	1829	2065	1761	2178	1945	1654	1848	1827.89	1884.26	1589.47	2050.31	2245.22	1665.59	1914.4	1882.45	0.00719527	0.22978	0.0313137	0.975019	1	0.079887	0.229836	0.347583	0.728153	0.999669	0.0726917	0.171538	0.423766	0.671737	1	no	no	no	0
FBgn0003187	qua	quail	protein_coding	2L	32	61	34	29	8	39	29	31.9805	55.661	30.6882	27.2998	9.23482	39.2734	30.042	32.0257	0.116728	0.363529	0.321098	0.748136	1	-0.12308	0.363212	-0.338866	0.734711	0.999669	-0.239808	0.397506	-0.603283	0.546321	1	no	no	no	0
FBgn0003189	r	rudimentary	protein_coding	X	523	401	519	458	359	407	500	522.682	365.902	468.447	431.149	414.412	409.853	517.965	447.201	-0.256691	0.291341	-0.88107	0.37828	1	-0.179197	0.291478	-0.614788	0.538695	0.999669	0.0774943	0.22731	0.340919	0.733164	1	no	no	no	0
FBgn0003204	ras	raspberry	protein_coding	X	1487	1459	1415	1982	1398	1530	1402	1486.1	1331.3	1277.17	1865.8	1613.78	1540.72	1452.37	1509.61	0.00305384	0.24425	0.0125029	0.990024	1	0.042855	0.244327	0.1754	0.860765	0.999669	0.0398011	0.18387	0.216463	0.828627	1	no	no	no	0
FBgn0003205	Ras85D	Ras_oncogene_at_85D	protein_coding	3R	519	648	714	518	450	535	450	518.684	591.284	644.453	487.632	519.459	538.75	466.168	538.061	0.131337	0.274874	0.477809	0.632786	1	-0.0324319	0.275233	-0.117834	0.906199	0.999669	-0.163769	0.211254	-0.775225	0.438207	1	no	no	no	0
FBgn0003206	Ras64B	Ras_oncogene_at_64B	protein_coding	3L	892	992	718	704	683	793	557	891.457	905.175	648.063	662.727	788.423	798.558	577.013	753.06	-0.222895	0.284575	-0.783257	0.433476	1	-0.254371	0.284732	-0.893369	0.37166	0.999669	-0.0314756	0.220686	-0.142626	0.886585	1	no	no	no	0
FBgn0003209	raw	raw	protein_coding	2L	856	849	783	667	637	640	378	855.479	774.691	706.732	627.896	735.322	644.486	391.581	676.598	-0.210034	0.308951	-0.679827	0.496614	1	-0.435515	0.309201	-1.40852	0.158978	0.934575	-0.225482	0.244937	-0.920568	0.357276	1	no	no	no	0
FBgn0003210	rb	ruby	protein_coding	X	905	1098	953	890	798	886	1274	904.45	1001.9	860.173	837.823	921.173	892.21	1319.77	962.5	-0.0147897	0.268796	-0.0550222	0.956121	1	0.18473	0.268804	0.68723	0.491938	0.999669	0.19952	0.205492	0.970939	0.331579	1	no	no	no	0
FBgn0003218	rdgB	retinal_degeneration_B	protein_coding	X	398	730	595	513	663	589	483	397.758	666.107	537.044	482.925	765.336	593.128	500.354	563.236	0.388304	0.301267	1.2889	0.197432	1	0.515067	0.301327	1.70933	0.0873905	0.847797	0.126763	0.235778	0.537635	0.590829	1	no	no	no	0
FBgn0003227	rec	recombination-defective	protein_coding	3R	71	89	48	69	27	10	74	70.9568	81.2103	43.3246	64.9548	31.1675	10.0701	76.6588	54.049	0.00933955	0.372816	0.0250514	0.980014	1	-0.318722	0.372608	-0.85538	0.392341	0.999669	-0.328062	0.399173	-0.821852	0.411161	1	no	no	no	0
FBgn0003231	ref(2)P	refractory_to_sigma_P	protein_coding	2L	2046	2263	2371	2769	2491	1762	2020	2044.76	2064.93	2140.05	2606.66	2875.49	1774.35	2092.58	2228.4	0.131254	0.25472	0.515288	0.606352	1	0.117201	0.254782	0.460005	0.645513	0.999669	-0.0140534	0.192944	-0.0728366	0.941936	1	no	no	no	0
FBgn0003248	Rh2	Rhodopsin_2	protein_coding	3R	0	0	0	0	0	14	0	0	0	0	0	0	14.0981	0	2.01402	0	0.122541	0	1	1	0.105065	0.122493	0.857728	0.391043	NA	0.147194	0.159919	0.920428	0.357349	NA	no	no	no	0
FBgn0003249	Rh3	Rhodopsin_3	protein_coding	3R	0	0	0	0	0	0	0	?	?	?	?	?	?	?	?	?	?	?	?	?	?	?	?	?	?	?	?	?	?	?	no	no	no	#VALUE!
FBgn0003250	Rh4	Rhodopsin_4	protein_coding	3L	3	0	0	10	0	22	0	2.99818	0	0	9.41374	0	22.1542	0	4.93802	-0.0190549	0.142904	-0.133341	0.893924	1	0.0524176	0.14284	0.366967	0.713643	NA	0.0714726	0.185474	0.385352	0.699977	NA	no	no	no	0
FBgn0003254	rib	ribbon	protein_coding	2R	0	0	0	10	0	0	0	0	0	0	9.41374	0	0	0	1.34482	0.101947	0.121313	0.840362	0.400705	1	0	0.120938	0	1	NA	-0.142467	0.158159	-0.90078	0.367705	NA	no	no	no	0
FBgn0003255	rk	rickets	protein_coding	2L	66	117	225	46	127	162	57	65.9599	106.76	203.084	43.3032	146.603	163.135	59.048	112.556	0.289974	0.389795	0.743914	0.456928	1	0.327666	0.389792	0.840619	0.400561	0.999669	0.0376927	0.391314	0.0963235	0.923264	1	no	no	no	0
FBgn0003256	rl	rolled	protein_coding	2R	194	206	204	208	167	227	126	193.882	187.97	184.129	195.806	192.777	228.591	130.527	187.669	-0.0199233	0.359062	-0.055487	0.955751	1	-0.0538552	0.359301	-0.149889	0.880852	0.999669	-0.0339319	0.30365	-0.111747	0.911024	1	no	no	no	0
FBgn0003257	r-l	rudimentary-like	protein_coding	3R	451	381	514	416	350	548	392	450.726	347.653	463.934	391.611	404.023	551.841	406.084	430.839	-0.142975	0.305162	-0.468523	0.639411	1	0.0180412	0.305209	0.0591111	0.952864	0.999669	0.161016	0.240664	0.669051	0.503463	1	no	no	no	0
FBgn0003261	Rm62	Rm62	protein_coding	3R	8246	8405	8509	6911	5858	6483	6437	8240.98	7669.35	7680.18	6505.83	6762.2	6528.44	6668.28	7150.75	-0.167108	0.162059	-1.03115	0.302468	1	-0.295185	0.162121	-1.82077	0.0686421	0.79713	-0.128077	0.117646	-1.08867	0.2763	1	no	no	no	0
FBgn0003267	ro	rough	protein_coding	3R	2	0	0	16	0	0	0	1.99878	0	0	15.062	0	0	0	2.43725	0.069534	0.123171	0.564534	0.572391	1	-0.0601684	0.122963	-0.489322	0.624614	NA	-0.129702	0.160567	-0.807778	0.419219	NA	no	no	no	0
FBgn0003268	rod	rough_deal	protein_coding	3R	848	736	751	795	514	707	695	847.484	671.582	677.849	748.392	593.337	711.955	719.971	710.081	-0.240975	0.248051	-0.971473	0.331313	1	-0.288296	0.248294	-1.16111	0.245598	0.994308	-0.0473216	0.187754	-0.25204	0.80101	1	no	no	no	0
FBgn0003270	amos	absent_MD_neurons_and_olfactory_sensilla	protein_coding	2L	0	0	0	0	0	0	0	?	?	?	?	?	?	?	?	?	?	?	?	?	?	?	?	?	?	?	?	?	?	?	no	no	no	#VALUE!
FBgn0003274	RpLP2	Ribosomal_protein_LP2	protein_coding	2R	657	297	636	393	299	384	543	656.6	271.005	574.05	369.96	345.151	386.691	562.51	452.281	-0.499801	0.348884	-1.43257	0.15198	1	-0.422889	0.348954	-1.21188	0.22556	0.984353	0.0769125	0.290351	0.264895	0.791091	1	no	no	no	0
FBgn0003275	RpII18	RNA_polymerase_II_18kD_subunit	protein_coding	3R	764	883	968	746	482	780	814	763.535	805.715	873.712	702.265	556.398	785.467	843.247	761.477	0.0524085	0.278716	0.188036	0.850849	1	-0.0616991	0.27893	-0.221199	0.824937	0.999669	-0.114108	0.214876	-0.531039	0.595391	1	no	no	no	0
FBgn0003277	RpII215	RNA_polymerase_II_215kD_subunit	protein_coding	X	8154	9893	9288	8957	7990	8734	8069	8149.04	9027.11	8383.3	8431.88	9223.27	8795.22	8358.92	8624.11	0.0764094	0.147721	0.517254	0.604979	1	0.105401	0.147752	0.713367	0.475619	0.999669	0.0289916	0.106633	0.271882	0.785713	1	no	no	no	0
FBgn0003278	RpI135	RNA_polymerase_I_135kD_subunit	protein_coding	2L	184	108	221	154	54	163	213	183.888	98.5473	199.474	144.972	62.335	164.142	220.653	153.43	-0.158186	0.392018	-0.403517	0.686568	1	-0.148237	0.392066	-0.378093	0.705362	0.999669	0.00994859	0.370119	0.0268794	0.978556	1	no	no	no	0
FBgn0003279	RpL4	Ribosomal_protein_L4	protein_coding	3R	44010	47646	56583	50396	42794	49533	56506	43983.2	43475.8	51071.5	47441.5	49399.4	49880.2	58536.2	49112.5	0.0981724	0.163548	0.600266	0.548329	1	0.247199	0.16355	1.51146	0.130672	0.914119	0.149026	0.118668	1.25582	0.20918	1	no	no	no	0
FBgn0003285	rst	roughest	protein_coding	X	138	88	196	340	108	110	53	137.916	80.2978	176.909	320.067	124.67	110.771	54.9043	143.648	0.322529	0.392769	0.821167	0.411551	1	-0.326034	0.392887	-0.82984	0.406629	0.999669	-0.648563	0.379497	-1.70901	0.0874495	1	no	no	no	0
FBgn0003292	rt	rotated_abdomen	protein_coding	3L	36	37	79	71	51	42	44	35.9781	33.7616	71.305	66.8375	58.872	42.2944	45.5809	50.6614	0.275904	0.389875	0.707674	0.479148	1	0.136163	0.389866	0.349256	0.726897	0.999669	-0.139741	0.391036	-0.357361	0.720822	1	no	no	no	0
FBgn0003295	ru	roughoid	protein_coding	3L	0	0	7	0	0	7	0	0	0	6.31817	0	0	7.04906	0	1.9096	0.0276016	0.122583	0.225167	0.821849	1	0.0353285	0.122432	0.288557	0.772921	NA	0.00772685	0.159902	0.0483223	0.961459	NA	no	no	no	0
FBgn0003300	run	runt	protein_coding	X	4	2	0	0	0	0	0	3.99757	1.82495	0	0	0	0	0	0.831788	-0.0872428	0.119119	-0.732403	0.463923	NA	-0.131109	0.118702	-1.10452	0.269366	NA	-0.0438662	0.155014	-0.282982	0.777191	NA	no	no	no	0
FBgn0003301	rut	rutabaga	protein_coding	X	459	553	599	413	423	446	575	458.721	504.599	540.654	388.787	488.291	449.126	595.66	489.405	0.0431563	0.296467	0.145569	0.884262	1	0.130468	0.296574	0.439917	0.659997	0.999669	0.0873118	0.23168	0.376864	0.706275	1	no	no	no	0
FBgn0003302	rux	roughex	protein_coding	X	94	64	61	51	62	49	48	93.9428	58.3984	55.0583	48.0101	71.5698	49.3434	49.7246	60.8639	-0.399577	0.392876	-1.01705	0.309128	1	-0.347732	0.392946	-0.884937	0.376191	0.999669	0.0518442	0.376338	0.13776	0.89043	1	no	no	no	0
FBgn0003308	ry	rosy	protein_coding	3R	0	33	27	47	29	40	57	0	30.1117	24.3701	44.2446	33.4762	40.2804	59.048	33.0758	0.597593	0.374319	1.59648	0.110382	1	0.831518	0.374331	2.22135	0.0263275	0.546331	0.233925	0.399183	0.586009	0.557869	1	no	no	no	0
FBgn0003310	S	Star	protein_coding	2L	729	771	1053	909	788	618	713	728.557	703.518	950.433	855.709	909.63	622.332	738.618	786.971	0.1729	0.277504	0.623055	0.533248	1	0.0391818	0.277723	0.141082	0.887805	0.999669	-0.133718	0.213583	-0.626071	0.531269	1	no	no	no	0
FBgn0003312	sad	shadow	protein_coding	3R	10	29	10	13	0	21	49	9.99392	26.4618	9.02595	12.2379	0	21.1472	50.7606	18.5182	0.0202274	0.277958	0.0727716	0.941988	1	0.165107	0.277902	0.59412	0.552432	0.999669	0.14488	0.337738	0.428971	0.667944	1	no	no	no	0
FBgn0003313	sala	spalt-adjacent	protein_coding	2L	0	0	0	0	0	0	0	?	?	?	?	?	?	?	?	?	?	?	?	?	?	?	?	?	?	?	?	?	?	?	no	no	no	#VALUE!
FBgn0003317	sax	saxophone	protein_coding	2R	532	463	511	558	251	333	355	531.676	422.476	461.226	525.287	289.742	335.334	367.755	419.071	-0.123308	0.290605	-0.424314	0.671337	1	-0.5823	0.29136	-1.99856	0.0456562	0.68671	-0.458992	0.227314	-2.01919	0.0434671	1	no	no	no	0
FBgn0003319	Sb	Stubble	protein_coding	3R	5	24	157	5	0	124	20	4.99696	21.8994	141.707	4.70687	0	124.869	20.7186	45.5569	0.218627	0.277974	0.786499	0.431575	1	0.164677	0.277886	0.592607	0.553444	0.999669	-0.0539494	0.337707	-0.159752	0.873076	1	no	no	no	0
FBgn0003321	sbr	small_bristles	protein_coding	X	1315	1433	1359	1439	1120	1537	1300	1314.2	1307.58	1226.63	1354.64	1292.87	1547.77	1346.71	1341.49	-0.0206846	0.210746	-0.0981495	0.921814	1	0.0820258	0.210817	0.389086	0.697213	0.999669	0.10271	0.155814	0.659187	0.509776	1	no	no	no	0
FBgn0003326	sca	scabrous	protein_coding	2R	0	9	85	29	14	61	15	0	8.21227	76.7206	27.2998	16.1609	61.4276	15.5389	29.3372	0.421796	0.326788	1.29073	0.196796	1	0.320154	0.326556	0.980395	0.326891	0.999669	-0.101642	0.378832	-0.268303	0.788466	1	no	no	no	0
FBgn0003328	scb	scab	protein_coding	2R	161	240	277	172	117	228	227	160.902	218.994	250.019	161.916	135.059	229.598	235.156	198.806	0.251607	0.366876	0.68581	0.492833	1	0.193014	0.367079	0.52581	0.59902	0.999669	-0.0585931	0.314528	-0.186289	0.852218	1	no	no	no	0
FBgn0003330	Sce	Sex_combs_extra	protein_coding	3R	138	112	112	137	96	66	137	137.916	102.197	101.091	128.968	110.818	66.4626	141.922	112.768	-0.170588	0.386609	-0.441241	0.659038	1	-0.212994	0.386771	-0.550697	0.581841	0.999669	-0.0424057	0.352019	-0.120464	0.904115	1	no	no	no	0
FBgn0003334	Scm	Sex_comb_on_midleg	protein_coding	3R	490	459	438	501	282	613	284	489.702	418.826	395.337	471.628	325.527	617.297	294.204	430.36	-0.133477	0.344322	-0.387651	0.698275	1	-0.180332	0.344466	-0.52351	0.600619	0.999669	-0.0468551	0.284387	-0.164758	0.869134	1	no	no	no	0
FBgn0003339	Scr	Sex_combs_reduced	protein_coding	3R	8	3	24	0	0	22	2	7.99513	2.73742	21.6623	0	0	22.1542	2.07186	8.0887	0.00158527	0.199665	0.00793964	0.993665	1	0.000639064	0.199507	0.00320321	0.997444	NA	-0.000946202	0.253929	-0.00372625	0.997027	NA	no	no	no	0
FBgn0003345	sd	scalloped	protein_coding	X	2232	1490	1646	1355	1117	1292	937	2230.64	1359.59	1485.67	1275.56	1289.41	1301.06	970.666	1416.09	-0.61881	0.232289	-2.66396	0.00772265	0.529317	-0.818771	0.232524	-3.52123	0.000429552	0.0406555	-0.199961	0.174485	-1.14601	0.251793	1	no	yes	no	1
FBgn0003346	RanGAP	Ran_GTPase_activating_protein	protein_coding	2L	310	302	368	310	143	292	188	309.811	275.567	332.155	291.826	165.072	294.047	194.755	266.176	-0.00160774	0.345927	-0.00464761	0.996292	1	-0.390217	0.346463	-1.12629	0.260044	0.999669	-0.388609	0.286861	-1.3547	0.175514	1	no	no	no	0
FBgn0003353	sei	seizure	protein_coding	2R	384	310	307	396	335	269	308	383.766	282.867	277.097	372.784	386.708	270.885	319.066	327.596	-0.235355	0.323023	-0.7286	0.466246	1	-0.17739	0.323176	-0.548895	0.583077	0.999669	0.057965	0.259884	0.223042	0.823503	1	no	no	no	0
FBgn0003356	Jon99Cii	Jonah_99Cii	protein_coding	3R	0	10	0	0	0	0	0	0	9.12475	0	0	0	0	0	1.30354	0.101718	0.121197	0.839279	0.401313	1	0	0.120812	0	1	NA	-0.14214	0.158007	-0.899578	0.368345	NA	no	no	no	0
FBgn0003357	Jon99Ciii	Jonah_99Ciii	protein_coding	3R	0	4	0	21	14	0	0	0	3.6499	0	19.7688	16.1609	0	0	5.65424	0.0713977	0.153368	0.465532	0.641551	1	0.0306574	0.153245	0.200055	0.841437	NA	-0.0407403	0.198439	-0.205304	0.837334	NA	no	no	no	0
FBgn0003358	Jon99Ci	Jonah_99Ci	protein_coding	3R	0	0	0	0	0	0	0	?	?	?	?	?	?	?	?	?	?	?	?	?	?	?	?	?	?	?	?	?	?	?	no	no	no	#VALUE!
FBgn0003360	sesB	stress-sensitive_B	protein_coding	X	9559	7025	10534	10207	6022	8796	6572	9553.19	6410.14	9507.94	9608.6	6951.51	8857.65	6808.13	8242.45	-0.14383	0.232306	-0.61914	0.535824	1	-0.309641	0.232341	-1.3327	0.18263	0.950765	-0.165811	0.173745	-0.954331	0.339916	1	no	no	no	0
FBgn0003366	sev	sevenless	protein_coding	X	21	33	8	36	47	0	41	20.9872	30.1117	7.22076	33.8895	54.2546	0	42.4731	26.991	-0.00926017	0.289712	-0.0319634	0.974501	1	0.10589	0.289651	0.365577	0.71468	0.999669	0.11515	0.348541	0.330377	0.741115	1	no	no	no	0
FBgn0003371	sgg	shaggy	protein_coding	X	1594	1672	1748	1715	1345	1453	1171	1593.03	1525.66	1577.74	1614.46	1552.6	1463.18	1213.07	1505.68	-0.0130571	0.212973	-0.0613088	0.951113	1	-0.16464	0.213181	-0.772301	0.439936	0.999669	-0.151583	0.157851	-0.960289	0.33691	1	no	no	no	0
FBgn0003372	Sgs1	Salivary_gland_secretion_1	protein_coding	2L	135	971	30	165	16	11	148	134.918	886.013	27.0779	155.327	18.4696	11.0771	153.318	198.029	0.305144	0.272323	1.12052	0.262491	1	-0.213845	0.272264	-0.78543	0.432201	0.999669	-0.518989	0.332177	-1.56239	0.118196	1	no	no	no	0
FBgn0003373	Sgs3	Salivary_gland_secretion_3	protein_coding	3L	444	2031	64	564	186	156	614	443.73	1853.24	57.7661	530.935	214.71	157.093	636.061	556.219	0.232222	0.308397	0.752997	0.451452	1	-0.143724	0.308376	-0.466067	0.641167	0.999669	-0.375946	0.364534	-1.0313	0.302398	1	no	no	no	0
FBgn0003374	Sgs4	Salivary_gland_secretion_4	protein_coding	X	205	1540	64	357	38	119	429	204.875	1405.21	57.7661	336.07	43.8654	119.834	444.414	373.148	0.312365	0.29582	1.05593	0.291	1	-0.111324	0.295789	-0.376363	0.706647	0.999669	-0.423689	0.353924	-1.19712	0.23126	1	no	no	no	0
FBgn0003375	Sgs5	Salivary_gland_secretion_5	protein_coding	3R	560	439	54	208	36	29	211	559.659	400.577	48.7401	195.806	41.5567	29.2033	218.581	213.446	-0.455435	0.378429	-1.20349	0.228788	1	-0.999551	0.378354	-2.64184	0.00824573	0.293556	-0.544116	0.39899	-1.36373	0.172651	1	no	no	no	0
FBgn0003377	Sgs7	Salivary_gland_secretion_7	protein_coding	3L	1989	2986	233	1816	158	157	1708	1987.79	2724.65	210.305	1709.53	182.388	158.1	1769.37	1248.88	0.00306791	0.297433	0.0103146	0.99177	1	-0.280628	0.297425	-0.943524	0.345413	0.999669	-0.283696	0.355329	-0.798404	0.424636	1	no	no	no	0
FBgn0003378	Sgs8	Salivary_gland_secretion_8	protein_coding	3L	85	161	0	49	5	15	63	84.9483	146.908	0	46.1273	5.77176	15.1051	65.2636	52.0178	-0.00302793	0.292509	-0.0103516	0.991741	1	-0.279064	0.292341	-0.954585	0.339787	0.999669	-0.276036	0.350856	-0.786751	0.431428	1	no	no	no	0
FBgn0003380	Sh	Shaker	protein_coding	X	22	34	23	8	44	2	81	21.9866	31.0241	20.7597	7.53099	50.7915	2.01402	83.9103	31.1453	-0.115784	0.317498	-0.364677	0.715353	1	0.269753	0.317614	0.84931	0.395709	0.999669	0.385537	0.371825	1.03688	0.299793	1	no	no	no	0
FBgn0003382	sha	shavenoid	protein_coding	2R	0	0	11	0	0	1	0	0	0	9.92855	0	0	1.00701	0	1.56222	0.088977	0.121917	0.729815	0.465503	1	-0.0268523	0.121619	-0.220791	0.825255	NA	-0.115829	0.158968	-0.728632	0.466227	NA	no	no	no	0
FBgn0003386	Shaw	Shaker_cognate_w	protein_coding	2L	992	1124	661	861	1001	476	505	991.397	1025.62	596.615	810.523	1155.51	479.336	523.145	797.449	-0.189739	0.351709	-0.539477	0.589557	1	-0.334912	0.351805	-0.951981	0.341107	0.999669	-0.145173	0.293711	-0.494271	0.621115	1	no	no	no	0
FBgn0003388	shd	shade	protein_coding	3L	35	70	37	15	385	28	19	34.9787	63.8732	33.396	14.1206	444.426	28.1963	19.6827	91.239	-0.193399	0.341232	-0.566767	NA	NA	0.628707	0.341406	1.84152	NA	NA	0.822106	0.387794	2.11996	NA	NA	no	no	no	0
FBgn0003390	shf	shifted	protein_coding	X	88	63	107	115	142	115	145	87.9465	57.4859	96.5777	108.258	163.918	115.806	150.21	111.457	-0.0755873	0.385906	-0.19587	0.844712	1	0.455096	0.385695	1.17994	0.238024	0.987865	0.530684	0.34935	1.51906	0.128748	1	no	no	no	0
FBgn0003391	shg	shotgun	protein_coding	2R	1355	998	1423	1151	774	1171	839	1354.18	910.65	1284.39	1083.52	893.469	1179.21	869.145	1082.08	-0.258893	0.263848	-0.981218	0.326485	1	-0.404246	0.264043	-1.53098	0.125774	0.909928	-0.145353	0.201579	-0.721071	0.470866	1	no	no	no	0
FBgn0003392	shi	shibire	protein_coding	X	1860	1878	1505	1363	1430	1540	1872	1858.87	1713.63	1358.41	1283.09	1650.72	1550.79	1939.26	1622.11	-0.324762	0.232989	-1.39389	0.163351	1	-0.0975624	0.232983	-0.418753	0.675397	0.999669	0.227199	0.174448	1.30239	0.192784	1	no	no	no	0
FBgn0003396	shn	schnurri	protein_coding	2R	1748	2558	2686	2599	2106	2158	1983	1746.94	2334.11	2424.37	2446.63	2431.07	2173.13	2054.25	2230.07	0.430476	0.18549	2.32075	0.0203004	0.892511	0.319802	0.185638	1.72272	0.0849398	0.845301	-0.110674	0.135305	-0.817958	0.413381	1	no	no	no	0
FBgn0003401	shu	shutdown	protein_coding	2R	655	841	831	640	535	782	775	654.602	767.391	750.057	602.479	617.578	787.481	802.846	711.776	0.0912309	0.268322	0.340006	0.733852	1	0.146004	0.268442	0.543896	0.586513	0.999669	0.0547735	0.205008	0.267178	0.789332	1	no	no	no	0
FBgn0003410	sina	seven_in_absentia	protein_coding	3L	3353	4185	3353	2488	2744	3173	3588	3350.96	3818.71	3026.4	2342.14	3167.54	3195.24	3716.92	3231.13	-0.118834	0.240493	-0.494124	0.621218	1	0.00766069	0.240512	0.0318516	0.97459	0.999669	0.126494	0.180671	0.700138	0.483841	1	no	no	no	0
FBgn0003411	sisA	sisterless_A	protein_coding	X	0	0	0	0	0	0	0	?	?	?	?	?	?	?	?	?	?	?	?	?	?	?	?	?	?	?	?	?	?	?	no	no	no	#VALUE!
FBgn0003415	skd	skuld	protein_coding	3L	1503	1560	1516	1425	1039	1092	1362	1502.09	1423.46	1368.33	1341.46	1199.37	1099.65	1410.94	1335.04	-0.108899	0.217951	-0.499648	0.617323	1	-0.25803	0.218178	-1.18266	0.236944	0.987478	-0.149131	0.162066	-0.920189	0.357474	1	no	no	no	0
FBgn0003416	sl	small_wing	protein_coding	X	140	97	98	146	39	58	78	139.915	88.5101	88.4543	137.441	45.0197	58.4065	80.8025	91.2212	-0.157078	0.390333	-0.402421	0.687374	1	-0.692308	0.390765	-1.77167	0.0764492	0.816981	-0.53523	0.363585	-1.47209	0.140997	1	no	no	no	0
FBgn0003423	slgA	sluggish_A	protein_coding	X	765	756	887	826	609	785	728	764.535	689.831	800.602	777.575	703.001	790.502	754.157	754.315	-0.0139176	0.238851	-0.0582692	0.953534	1	-0.0260104	0.239059	-0.108803	0.913358	0.999669	-0.0120928	0.179348	-0.0674262	0.946242	1	no	no	no	0
FBgn0003429	slo	slowpoke	protein_coding	3R	19	4	9	8	8	0	0	18.9884	3.6499	8.12336	7.53099	9.23482	0	0	6.78964	-0.122391	0.211344	-0.57911	0.562515	1	-0.221977	0.211004	-1.05201	0.292796	NA	-0.099586	0.266949	-0.373053	0.709109	NA	no	no	no	0
FBgn0003430	slp1	sloppy_paired_1	protein_coding	2L	0	22	44	0	6	0	0	0	20.0744	39.7142	0	6.92611	0	0	9.53068	0.210901	0.183645	1.14842	0.250796	1	-0.0581175	0.183392	-0.316904	0.751317	NA	-0.269019	0.235087	-1.14434	0.252483	NA	no	no	no	0
FBgn0003435	sm	smooth	protein_coding	2R	945	652	788	761	495	501	552	944.425	594.934	711.245	716.385	571.404	504.512	571.833	659.248	-0.41308	0.253212	-1.63136	0.102815	1	-0.690162	0.253707	-2.72032	0.00652196	0.258454	-0.277082	0.192933	-1.43615	0.150959	1	no	no	no	0
FBgn0003444	smo	smoothened	protein_coding	2L	256	228	266	234	192	291	112	255.844	208.044	240.09	220.281	221.636	293.04	116.024	222.137	-0.11842	0.371991	-0.318341	0.750226	1	-0.184647	0.37216	-0.496149	0.619789	0.999669	-0.0662267	0.323226	-0.204893	0.837656	1	no	no	no	0
FBgn0003447	sn	singed	protein_coding	X	3791	3003	3704	1958	2353	3261	3120	3788.69	2740.16	3343.21	1843.21	2716.19	3283.86	3232.1	2992.49	-0.454926	0.26123	-1.74148	0.0816001	1	-0.24965	0.261232	-0.955664	0.339242	0.999669	0.205276	0.19892	1.03196	0.302093	1	no	no	no	0
FBgn0003448	sna	snail	protein_coding	2L	6	17	15	8	0	1	64	5.99635	15.5121	13.5389	7.53099	0	1.00701	66.2995	15.6978	0.00835156	0.244923	0.0340988	NA	NA	0.173453	0.244889	0.708293	NA	NA	0.165102	0.304474	0.542251	NA	NA	no	no	no	0
FBgn0003449	snf	sans_fille	protein_coding	X	509	536	666	693	707	819	770	508.69	489.087	601.128	652.372	816.127	824.74	797.666	669.973	0.145479	0.25921	0.561241	0.574634	1	0.599334	0.259003	2.314	0.0206676	0.484762	0.453855	0.196045	2.31505	0.02061	1	no	no	no	0
FBgn0003450	snk	snake	protein_coding	3R	7	0	0	0	11	0	0	6.99574	0	0	0	12.6979	0	0	2.81337	-0.0959181	0.123458	-0.776928	0.437201	1	0.00030804	0.123396	0.00249636	0.998008	NA	0.0962262	0.160983	0.59774	0.550013	NA	no	no	no	0
FBgn0003459	stwl	stonewall	protein_coding	3L	701	708	1072	570	667	770	456	700.574	646.032	967.582	536.583	769.953	775.397	472.384	695.501	0.0305581	0.325872	0.0937734	0.925289	1	-0.0500709	0.326001	-0.153592	0.877932	0.999669	-0.0806291	0.262611	-0.307029	0.758821	1	no	no	no	0
FBgn0003460	so	sine_oculis	protein_coding	2R	96	187	146	85	33	74	77	95.9416	170.633	131.779	80.0168	38.0936	74.5187	79.7666	95.8213	0.299387	0.392343	0.763075	0.445419	1	-0.369397	0.392634	-0.940818	0.346798	0.999669	-0.668784	0.373127	-1.79237	0.0730729	1	no	no	no	0
FBgn0003462	Sod	Superoxide_dismutase	protein_coding	3L	627	788	742	684	537	836	915	626.619	719.03	669.726	643.9	619.887	841.86	947.876	724.128	0.0837258	0.275557	0.303842	0.761248	1	0.311	0.275547	1.12866	0.25904	0.999669	0.227274	0.211473	1.07472	0.2825	1	no	no	no	0
FBgn0003463	sog	short_gastrulation	protein_coding	X	227	194	386	109	156	408	246	226.862	177.02	348.402	102.61	180.079	410.86	254.839	242.953	-0.102507	0.389142	-0.263418	0.792228	1	0.207174	0.38912	0.532417	0.594437	0.999669	0.309681	0.3586	0.863585	0.387816	1	no	no	no	0
FBgn0003464	sol	small_optic_lobes	protein_coding	X	1410	1707	1583	1720	1090	1314	1147	1409.14	1557.59	1428.81	1619.16	1258.24	1323.21	1188.21	1397.77	0.120067	0.201807	0.594956	0.551873	1	-0.158392	0.202136	-0.783589	0.433281	0.999669	-0.278458	0.148798	-1.87138	0.0612918	1	no	no	no	0
FBgn0003475	spir	spire	protein_coding	2L	429	980	628	742	587	333	608	428.739	894.225	566.83	698.499	677.605	335.334	629.845	604.44	0.569493	0.335513	1.69738	0.089625	1	0.227134	0.335755	0.676488	0.498731	0.999669	-0.342359	0.273218	-1.25306	0.210182	1	no	no	no	0
FBgn0003479	spn-A	spindle_A	protein_coding	3R	25	48	35	26	17	27	50	24.9848	43.7988	31.5908	24.4757	19.624	27.1892	51.7965	31.9228	0.11595	0.371952	0.311734	0.755243	1	0.107257	0.371813	0.28847	0.772987	0.999669	-0.00869324	0.399149	-0.0217795	0.982624	1	no	no	no	0
FBgn0003480	spn-B	spindle_B	protein_coding	3R	6	17	27	34	9	14	11	5.99635	15.5121	24.3701	32.0067	10.3892	14.0981	11.3952	16.2525	0.437746	0.339896	1.28788	0.197787	1	0.0415536	0.339024	0.122568	0.902449	0.999669	-0.396192	0.3871	-1.02349	0.306077	NA	no	no	no	0
FBgn0003482	spn-D	spindle_D	protein_coding	3R	0	0	1	14	0	13	0	0	0	0.902595	13.1792	0	13.0911	0	3.88185	0.0429196	0.136818	0.313699	0.753749	1	0.0367045	0.136707	0.268489	0.788323	NA	-0.00621517	0.17786	-0.0349442	0.972124	NA	no	no	no	0
FBgn0003483	spn-E	spindle_E	protein_coding	3R	1566	1463	1659	2034	1045	1276	1731	1565.05	1334.95	1497.41	1914.75	1206.3	1284.94	1793.19	1513.8	0.0193248	0.266983	0.0723822	0.942298	1	-0.11802	0.267111	-0.44184	0.658605	0.999669	-0.137345	0.204063	-0.673054	0.500913	1	no	no	no	0
FBgn0003486	spo	spook	protein_coding	3L	6	21	19	19	5	0	2	5.99635	19.162	17.1493	17.8861	5.77176	0	2.07186	9.71962	0.32859	0.269904	1.21743	0.22344	1	-0.21394	0.268698	-0.796213	0.425908	NA	-0.54253	0.329317	-1.64744	0.0994679	NA	no	no	no	0
FBgn0003495	spz	spatzle	protein_coding	3R	364	1533	565	382	1913	977	1133	363.779	1398.82	509.966	359.605	2208.28	983.848	1173.71	999.715	0.203444	0.388584	0.523553	0.600589	1	0.772924	0.388586	1.98907	0.0466933	0.688949	0.56948	0.393323	1.44787	0.147654	1	no	no	no	0
FBgn0003499	sr	stripe	protein_coding	3R	22	11	169	2	7	9	48	21.9866	10.0372	152.539	1.88275	8.08047	9.06308	49.7246	36.1876	0.257883	0.292809	0.880722	NA	NA	-0.0870433	0.292535	-0.297548	NA	NA	-0.344927	0.351216	-0.982093	NA	NA	no	no	no	0
FBgn0003502	Btk29A	Btk_family_kinase_at_29A	protein_coding	2L	305	302	231	167	199	269	142	304.814	275.567	208.499	157.209	229.716	270.885	147.102	227.685	-0.336277	0.366248	-0.918166	0.358532	1	-0.32469	0.36639	-0.886186	0.375518	0.999669	0.0115871	0.314424	0.0368519	0.970603	1	no	no	no	0
FBgn0003507	srp	serpent	protein_coding	3R	2887	3798	3170	2492	3912	2982	2705	2885.24	3465.58	2861.23	2345.9	4515.83	3002.9	2802.19	3125.55	-0.00744458	0.264818	-0.0281121	0.977573	1	0.226178	0.264814	0.854101	0.393049	0.999669	0.233623	0.201955	1.1568	0.247352	1	no	no	no	0
FBgn0003510	Sry-alpha	Serendipity_alpha	protein_coding	3R	0	0	0	0	0	0	0	?	?	?	?	?	?	?	?	?	?	?	?	?	?	?	?	?	?	?	?	?	?	?	no	no	no	#VALUE!
FBgn0003511	Sry-beta	Serendipity_beta	protein_coding	3R	0	0	0	0	0	0	0	?	?	?	?	?	?	?	?	?	?	?	?	?	?	?	?	?	?	?	?	?	?	?	no	no	no	#VALUE!
FBgn0003512	Sry-delta	Serendipity_delta	protein_coding	3R	306	286	366	396	266	335	312	305.814	260.968	330.35	372.784	307.058	337.348	323.21	319.647	0.0551056	0.313914	0.175544	0.860653	1	0.0600296	0.314141	0.191091	0.848454	0.999669	0.00492402	0.24955	0.0197316	0.984257	1	no	no	no	0
FBgn0003513	ss	spineless	protein_coding	3R	4	19	117	18	0	20	6	3.99757	17.337	105.604	16.9447	0	20.1402	6.21558	24.3198	0.507315	0.290699	1.74515	NA	NA	-0.114007	0.290043	-0.39307	NA	NA	-0.621322	0.34931	-1.77871	NA	NA	no	no	no	0
FBgn0003514	sqh	spaghetti_squash	protein_coding	X	1290	1586	1479	1432	982	1579	1421	1289.22	1447.19	1334.94	1348.05	1133.57	1590.07	1472.06	1373.58	0.0835248	0.23401	0.356929	0.721145	1	0.105427	0.234109	0.450331	0.652472	0.999669	0.0219018	0.175043	0.125122	0.900427	1	no	no	no	0
FBgn0003515	st	scarlet	protein_coding	3L	0	0	0	0	0	0	0	?	?	?	?	?	?	?	?	?	?	?	?	?	?	?	?	?	?	?	?	?	?	?	no	no	no	#VALUE!
FBgn0003517	sta	stubarista	protein_coding	X	33101	38374	38922	34282	30714	39635	39377	33080.9	35015.3	35130.8	32272.2	35454.8	39912.8	40791.8	35951.2	0.0414174	0.14823	0.279414	0.779927	1	0.21974	0.148231	1.48241	0.13823	0.920671	0.178322	0.10703	1.66609	0.095695	1	no	no	no	0
FBgn0003520	stau	staufen	protein_coding	2R	2601	3343	3033	3244	2579	2503	3073	2599.42	3050.4	2737.57	3053.82	2977.07	2520.54	3183.41	2874.61	0.168312	0.194274	0.866362	0.386291	1	0.142649	0.194355	0.733961	0.462973	0.999669	-0.0256631	0.14252	-0.180067	0.8571	1	no	no	no	0
FBgn0003525	stg	string	protein_coding	3R	3042	3608	2974	3729	3002	2433	3446	3040.15	3292.21	2684.32	3510.38	3465.37	2450.05	3569.81	3144.61	0.0503748	0.23631	0.213172	0.831193	1	0.0500556	0.236358	0.211778	0.83228	0.999669	-0.000319257	0.177066	-0.00180304	0.998561	1	no	no	no	0
FBgn0003527	stil	stand_still	protein_coding	2R	27	58	13	27	5	0	3	26.9836	52.9235	11.7337	25.4171	5.77176	0	3.10779	17.9911	0.196788	0.302865	0.649755	0.51585	1	-0.526796	0.301714	-1.74601	0.0808092	0.832882	-0.723584	0.359064	-2.0152	0.0438841	NA	no	no	no	0
FBgn0003545	sub	subito	protein_coding	2R	90	210	167	153	140	94	129	89.9453	191.62	150.733	144.03	161.609	94.6589	133.635	138.033	0.533084	0.375483	1.41973	0.155687	1	0.28008	0.375872	0.745147	0.456183	0.999669	-0.253003	0.328283	-0.770687	0.440892	1	no	no	no	0
FBgn0003557	Su(dx)	Suppressor_of_deltex	protein_coding	2L	807	799	813	703	664	752	826	806.509	729.067	733.81	661.786	766.49	757.271	855.678	758.659	-0.171229	0.236392	-0.724345	0.468854	1	-0.0163455	0.236447	-0.0691297	0.944886	0.999669	0.154884	0.17733	0.873419	0.382435	1	no	no	no	0
FBgn0003559	su(f)	suppressor_of_forked	protein_coding	X	345	365	487	417	359	350	379	344.79	333.053	439.564	392.553	414.412	352.453	392.617	381.349	0.138425	0.297739	0.464921	0.641988	1	0.131706	0.297976	0.442001	0.658488	0.999669	-0.00671934	0.23283	-0.0288595	0.976977	1	no	no	no	0
FBgn0003567	su(Hw)	suppressor_of_Hairy_wing	protein_coding	3R	560	258	563	576	238	494	319	559.659	235.419	508.161	542.231	274.736	497.462	330.462	421.161	-0.240272	0.362534	-0.662757	0.507486	1	-0.420225	0.362698	-1.15861	0.246615	0.995311	-0.179953	0.308759	-0.582827	0.56001	1	no	no	no	0
FBgn0003575	su(s)	suppressor_of_sable	protein_coding	X	827	829	789	854	836	952	640	826.497	756.442	712.148	803.933	965.038	958.673	662.995	812.247	-0.114199	0.26861	-0.425148	0.670729	1	0.059175	0.268637	0.220279	0.825654	0.999669	0.173374	0.205479	0.843755	0.398806	1	no	no	no	0
FBgn0003598	Su(var)3-7	Suppressor_of_variegation_3-7	protein_coding	3R	642	847	836	759	476	668	722	641.61	772.866	754.569	714.503	549.472	672.682	747.941	693.378	0.196117	0.259615	0.755415	0.45	1	0.0221622	0.25994	0.0852586	0.932056	0.999669	-0.173955	0.19727	-0.881811	0.377879	1	no	no	no	0
FBgn0003607	Su(var)205	Suppressor_of_variegation_205	protein_coding	2L	1400	1702	1439	1419	1149	1473	1662	1399.15	1553.03	1298.83	1335.81	1326.35	1483.32	1721.72	1445.46	-0.00620995	0.226245	-0.027448	0.978102	1	0.102454	0.2263	0.452736	0.650739	0.999669	0.108664	0.168557	0.644674	0.519138	1	no	no	no	0
FBgn0003612	Su(var)2-10	Suppressor_of_variegation_2-10	protein_coding	2R	6647	6723	7512	6453	4849	5197	5091	6642.96	6134.57	6780.29	6074.68	5597.45	5233.43	5273.92	5962.47	-0.0633996	0.155281	-0.40829	0.683061	1	-0.296355	0.155384	-1.90725	0.0564887	0.746863	-0.232955	0.112502	-2.07069	0.0383881	1	no	no	no	0
FBgn0003638	su(w[a])	suppressor_of_white-apricot	protein_coding	X	6240	5732	5638	4507	4218	5143	4277	6236.2	5230.31	5088.83	4242.77	4869.06	5179.05	4430.67	5039.56	-0.33777	0.183851	-1.8372	0.0661809	1	-0.345801	0.183899	-1.88038	0.0600561	0.766605	-0.00803112	0.134556	-0.0596862	0.952406	1	no	no	no	0
FBgn0003651	svp	seven_up	protein_coding	3R	507	989	969	1220	1723	784	959	506.692	902.438	874.615	1148.48	1988.95	789.495	993.457	1029.16	0.642611	0.337437	1.90439	0.0568594	1	0.959661	0.337412	2.84418	0.00445253	0.196341	0.31705	0.27516	1.15224	0.249223	1	no	no	no	0
FBgn0003654	sw	short_wing	protein_coding	X	832	1022	832	878	803	999	836	831.494	932.549	750.959	826.526	926.945	1006	866.037	877.216	0.00292875	0.239148	0.0122466	0.990229	1	0.151824	0.239199	0.63472	0.525611	0.999669	0.148895	0.179351	0.83019	0.406432	1	no	no	no	0
FBgn0003655	swa	swallow	protein_coding	X	35	27	27	8	21	45	1	34.9787	24.6368	24.3701	7.53099	24.2414	45.3154	1.03593	23.1585	-0.169496	0.307814	-0.550644	0.581878	1	-0.0799494	0.307709	-0.259821	0.795002	0.999669	0.0895465	0.363881	0.246087	0.805615	1	no	no	no	0
FBgn0003656	sws	swiss_cheese	protein_coding	X	2606	3362	2796	2900	2878	2763	3017	2604.41	3067.74	2523.66	2729.98	3322.23	2782.37	3125.4	2879.4	0.0811605	0.193763	0.418864	0.675315	1	0.225662	0.193787	1.16449	0.244227	0.994308	0.144502	0.142089	1.01698	0.309164	1	no	no	no	0
FBgn0003660	Syb	Synaptobrevin	protein_coding	2R	527	790	764	667	801	754	620	526.679	720.855	689.583	627.896	924.636	759.285	642.276	698.744	0.301926	0.270008	1.11821	0.263477	1	0.478502	0.270036	1.77199	0.0763957	0.816981	0.176576	0.205958	0.857341	0.391257	1	no	no	no	0
FBgn0003676	T-cp1	Tcp1-like	protein_coding	3R	1538	1371	1536	1243	987	1590	1461	1537.06	1251	1386.39	1170.13	1139.35	1601.14	1513.49	1371.22	-0.248948	0.240363	-1.03572	0.300335	1	-0.0973758	0.240395	-0.405066	0.685429	0.999669	0.151572	0.180715	0.838736	0.401618	1	no	no	no	0
FBgn0003683	term	terminus	protein_coding	3L	0	0	0	0	0	0	0	?	?	?	?	?	?	?	?	?	?	?	?	?	?	?	?	?	?	?	?	?	?	?	no	no	no	#VALUE!
FBgn0003687	Tbp	TATA_binding_protein	protein_coding	2R	386	273	377	314	309	272	327	385.765	249.106	340.278	295.591	356.695	273.906	338.749	320.013	-0.30654	0.317477	-0.965549	0.33427	1	-0.190635	0.317583	-0.600267	0.548328	0.999669	0.115906	0.253977	0.456361	0.64813	1	no	no	no	0
FBgn0003701	thr	three_rows	protein_coding	2R	370	176	244	251	253	144	157	369.775	160.596	220.233	236.285	292.051	145.009	162.641	226.656	-0.550931	0.36831	-1.49584	0.134697	1	-0.584537	0.368482	-1.58634	0.112663	0.904218	-0.0336054	0.317891	-0.105714	0.91581	1	no	no	no	0
FBgn0003710	tipE	temperature-induced_paralytic_E	protein_coding	3L	0	16	40	2	29	0	19	0	14.5996	36.1038	1.88275	33.4762	0	19.6827	15.1064	0.15433	0.245765	0.627955	0.530034	1	0.156777	0.245615	0.638306	0.523274	NA	0.00244786	0.305389	0.00801556	0.993605	NA	no	no	no	0
FBgn0003714	tko	technical_knockout	protein_coding	X	78	75	58	88	78	51	54	77.9526	68.4356	52.3505	82.8409	90.0395	51.3575	55.9402	68.4167	-0.0887215	0.392799	-0.22587	0.821302	1	-0.119346	0.39288	-0.303772	0.761302	0.999669	-0.0306244	0.377287	-0.0811701	0.935307	1	no	no	no	0
FBgn0003716	tkv	thickveins	protein_coding	2L	13318	13482	14368	14618	9701	10798	11205	13309.9	12302	12968.5	13761	11198.4	10873.7	11607.6	12288.7	-0.0291865	0.144316	-0.202241	0.839728	1	-0.238255	0.144367	-1.65034	0.098873	0.867645	-0.209069	0.10415	-2.00738	0.0447092	1	no	no	no	0
FBgn0003719	tld	tolloid	protein_coding	3R	16	6	3	10	8	3	22	15.9903	5.47485	2.70779	9.41374	9.23482	3.02103	22.7905	9.80471	-0.235624	0.282237	-0.834843	0.403806	1	-0.0173819	0.282245	-0.0615846	0.950894	NA	0.218242	0.341354	0.639343	0.5226	NA	no	no	no	0
FBgn0003720	tll	tailless	protein_coding	3R	2	3	0	0	0	0	14	1.99878	2.73742	0	0	0	0	14.503	2.74846	-0.0370553	0.124682	-0.297198	0.766315	1	0.0537074	0.124615	0.430987	0.666478	NA	0.0907628	0.162581	0.558262	0.576665	NA	no	no	no	0
FBgn0003721	Tm1	Tropomyosin_1	protein_coding	3R	11492	11210	11484	7383	7467	9099	8302	11485	10228.8	10365.4	6950.16	8619.55	9162.78	8600.29	9344.58	-0.292411	0.213534	-1.36939	0.170878	1	-0.352038	0.21356	-1.64843	0.0992646	0.869517	-0.0596271	0.158188	-0.376938	0.70622	1	no	no	no	0
FBgn0003731	Egfr	Epidermal_growth_factor_receptor	protein_coding	2R	1646	1210	1240	1259	749	1122	901	1645	1104.09	1119.22	1185.19	864.61	1129.86	933.373	1140.19	-0.472604	0.22868	-2.06666	0.0387663	1	-0.68071	0.228979	-2.9728	0.00295098	0.159677	-0.208105	0.171514	-1.21334	0.224999	1	no	no	no	0
FBgn0003732	Top2	Topoisomerase_2	protein_coding	2L	1027	770	903	861	682	827	649	1026.38	702.606	815.043	810.523	787.268	832.797	672.318	806.704	-0.353828	0.244642	-1.44631	0.148091	1	-0.374852	0.244843	-1.53099	0.125771	0.909928	-0.0210245	0.184891	-0.113713	0.909466	1	no	no	no	0
FBgn0003733	tor	torso	protein_coding	2R	39	26	57	42	68	61	73	38.9763	23.7243	51.4479	39.5377	78.496	61.4276	75.6229	52.7475	-0.111282	0.390994	-0.284613	0.775941	1	0.451375	0.390977	1.15448	0.248303	0.995324	0.562657	0.388754	1.44733	0.147803	1	no	no	no	0
FBgn0003741	tra	transformer	protein_coding	3L	303	416	333	301	197	251	387	302.816	379.59	300.564	283.353	227.407	252.759	400.905	306.771	0.0694081	0.344553	0.201444	0.840351	1	-0.0400443	0.344799	-0.116138	0.907543	0.999669	-0.109452	0.284518	-0.384694	0.700464	1	no	no	no	0
FBgn0003742	tra2	transformer_2	protein_coding	2R	529	382	620	487	506	335	459	528.678	348.565	559.609	458.449	584.102	337.348	475.492	470.321	-0.162656	0.329113	-0.494226	0.621147	1	-0.135567	0.32923	-0.411768	0.680509	0.999669	0.0270894	0.266425	0.101677	0.919013	1	no	no	no	0
FBgn0003744	trc	tricornered	protein_coding	3L	3955	3981	3757	3374	3035	3099	3372	3952.59	3632.56	3391.05	3176.19	3503.46	3120.72	3493.15	3467.11	-0.204456	0.173953	-1.17536	0.239852	1	-0.215956	0.174029	-1.24092	0.214636	0.973953	-0.0114996	0.126855	-0.090652	0.927769	1	no	no	no	0
FBgn0003747	Gr5a	Gustatory_receptor_5a	protein_coding	X	0	0	0	0	0	0	0	?	?	?	?	?	?	?	?	?	?	?	?	?	?	?	?	?	?	?	?	?	?	?	no	no	no	#VALUE!
FBgn0003748	Treh	Trehalase	protein_coding	2R	277	279	258	440	313	211	285	276.832	254.581	232.87	414.204	361.312	212.479	295.24	292.502	0.0838774	0.357103	0.234883	0.8143	1	0.0394148	0.357268	0.110323	0.912153	0.999669	-0.0444625	0.300718	-0.147855	0.882457	1	no	no	no	0
FBgn0003751	trk	trunk	protein_coding	2L	0	6	0	0	0	0	0	0	5.47485	0	0	0	0	0	0.782121	0.0967272	0.118609	0.815512	0.414779	NA	0	0.118026	0	1	NA	-0.135029	0.154627	-0.873254	0.382525	NA	no	no	no	0
FBgn0003861	trp	transient_receptor_potential	protein_coding	3R	1	7	0	0	0	0	0	0.999392	6.38732	0	0	0	0	0	1.05525	0.0609023	0.120351	0.506039	0.612829	1	-0.0592833	0.11992	-0.494356	0.621055	NA	-0.120186	0.156853	-0.766232	0.443539	NA	no	no	no	0
FBgn0003862	trx	trithorax	protein_coding	3R	675	888	950	788	614	605	839	674.589	810.278	857.465	741.802	708.772	609.24	869.145	753.042	0.220101	0.264852	0.831035	0.405954	1	0.0898547	0.265104	0.338941	0.734654	0.999669	-0.130246	0.201875	-0.645182	0.518809	1	no	no	no	0
FBgn0003863	alphaTry	alphaTrypsin	protein_coding	2R	42	24	0	0	6	0	0	41.9745	21.8994	0	0	6.92611	0	0	10.1143	-0.167962	0.176022	-0.954211	0.339977	1	-0.238763	0.175896	-1.35741	0.174652	NA	-0.0708005	0.225842	-0.313496	0.753904	NA	no	no	no	0
FBgn0003865	tsg	twisted_gastrulation	protein_coding	X	0	0	0	0	0	0	0	?	?	?	?	?	?	?	?	?	?	?	?	?	?	?	?	?	?	?	?	?	?	?	no	no	no	#VALUE!
FBgn0003866	tsh	teashirt	protein_coding	2L	1503	998	922	1221	431	1137	500	1502.09	910.65	832.193	1149.42	497.526	1144.97	517.965	936.401	-0.445429	0.338228	-1.31695	0.187855	1	-0.805454	0.338401	-2.38017	0.0173045	0.450672	-0.360025	0.277197	-1.2988	0.194011	1	no	no	no	0
FBgn0003867	tsl	torso-like	protein_coding	3R	13	14	8	24	39	13	0	12.9921	12.7746	7.22076	22.593	45.0197	13.0911	0	16.2416	-0.013823	0.270212	-0.0511562	0.959201	1	0.085631	0.270114	0.317019	0.75123	0.999669	0.099454	0.33017	0.301221	0.763246	NA	no	no	no	0
FBgn0003870	ttk	tramtrack	protein_coding	3R	3925	3348	3997	4159	2697	2786	2763	3922.61	3054.97	3607.67	3915.17	3113.29	2805.53	2862.27	3325.93	-0.137588	0.191709	-0.717696	0.472945	1	-0.397557	0.191856	-2.07216	0.0382507	0.627618	-0.259968	0.140811	-1.84623	0.0648593	1	no	no	no	0
FBgn0003882	tub	tube	protein_coding	3R	896	833	951	1028	765	1096	727	895.455	760.092	858.368	967.732	883.079	1103.68	753.121	888.79	-0.0499686	0.267381	-0.186882	0.851753	1	0.0276398	0.267465	0.10334	0.917693	0.999669	0.0776083	0.204365	0.379754	0.704128	1	no	no	no	0
FBgn0003884	alphaTub84B	alpha-Tubulin_at_84B	protein_coding	3R	79104	85128	85064	85861	75483	81186	88479	79055.9	77677.2	76778.3	80827.3	87134	81755	91658	82126.5	-0.0125581	0.136127	-0.0922529	0.926497	1	0.13234	0.136128	0.972173	0.330965	0.999669	0.144898	0.0979639	1.4791	0.139113	1	no	no	no	0
FBgn0003885	alphaTub84D	alpha-Tubulin_at_84D	protein_coding	3R	4463	5355	4773	5015	3963	4730	4707	4460.29	4886.3	4308.09	4720.99	4574.7	4763.15	4876.12	4655.66	0.0533041	0.160163	0.332811	0.739277	1	0.0833247	0.160213	0.520086	0.603004	0.999669	0.0300207	0.116062	0.25866	0.795897	1	no	no	no	0
FBgn0003886	alphaTub85E	alpha-Tubulin_at_85E	protein_coding	3R	528	442	384	406	1682	330	233	527.679	403.314	346.597	382.198	1941.62	332.313	241.372	596.442	-0.222548	0.360748	-0.616908	NA	NA	0.286455	0.360759	0.794032	NA	NA	0.509003	0.396711	1.28306	NA	NA	no	no	no	0
FBgn0003887	betaTub56D	beta-Tubulin_at_56D	protein_coding	2R	79269	85523	86272	77820	69181	84056	82863	79220.8	78037.6	77868.7	73257.7	79859.2	84645.2	85840.2	79818.5	-0.0519849	0.132185	-0.393275	0.694116	1	0.073721	0.132187	0.557705	0.577046	0.999669	0.125706	0.0950297	1.32281	0.1859	1	no	no	no	0
FBgn0003888	betaTub60D	beta-Tubulin_at_60D	protein_coding	2R	25628	29296	29964	27093	30847	26838	28782	25612.4	26731.9	27045.4	25504.6	35608.3	27026.1	29816.1	28192.1	0.0389909	0.173233	0.225078	0.821919	1	0.254982	0.173233	1.4719	0.141048	0.924298	0.215991	0.126115	1.71265	0.0867778	1	no	no	no	0
FBgn0003889	betaTub85D	beta-Tubulin_at_85D	protein_coding	3R	0	0	1	0	0	0	0	?	?	?	?	?	?	?	?	?	?	?	?	?	?	?	?	?	?	?	?	?	?	?	no	no	no	#VALUE!
FBgn0003890	betaTub97EF	beta-Tubulin_at_97EF	protein_coding	3R	59	101	39	21	123	20	106	58.9641	92.16	35.2012	19.7688	141.985	20.1402	109.809	68.2897	-0.156777	0.368241	-0.425746	0.670293	1	0.262833	0.368306	0.713627	0.475458	0.999669	0.419611	0.39866	1.05255	0.292546	1	no	no	no	0
FBgn0003891	tud	tudor	protein_coding	2R	3165	2946	3549	3512	2795	2628	2278	3163.07	2688.15	3203.31	3306.1	3226.41	2646.42	2359.85	2941.9	-0.0367695	0.216816	-0.169588	0.865334	1	-0.190029	0.216921	-0.876029	0.381014	0.999669	-0.153259	0.160916	-0.952416	0.340886	1	no	no	no	0
FBgn0003892	ptc	patched	protein_coding	2R	11530	14853	13383	14092	9878	12326	12390	11523	13553	12079.4	13265.8	11402.7	12412.4	12835.2	12438.8	0.163762	0.152363	1.07481	0.282458	1	0.0795849	0.152396	0.522225	0.601514	0.999669	-0.0841773	0.110146	-0.764235	0.444727	1	no	no	no	0
FBgn0003896	tup	tailup	protein_coding	2L	0	0	41	0	11	13	49	0	0	37.0064	0	12.6979	13.0911	50.7606	16.2223	0.0364682	0.221265	0.164817	0.869088	1	0.201829	0.22124	0.912263	0.361631	0.999669	0.165361	0.278729	0.593268	0.553002	NA	no	no	no	0
FBgn0003900	twi	twist	protein_coding	2R	9	38	135	17	11	31	9	8.99453	34.674	121.85	16.0034	12.6979	31.2173	9.32337	33.5373	0.632784	0.343647	1.84138	0.0655662	1	-0.0494645	0.342973	-0.144223	0.885325	0.999669	-0.682249	0.389097	-1.75341	0.079531	1	no	no	no	0
FBgn0003916	snRNA:U1:21D	small_nuclear_RNA_U1_at_21D	snRNA	2L	?	?	?	?	?	?	?	?	?	?	?	?	?	?	?	?	?	?	?	?	?	?	?	?	?	?	?	?	?	?	no	no	no	#VALUE!
FBgn0003920	snRNA:U2:14B	small_nuclear_RNA_U2_at_14B	snRNA	X	?	?	?	?	?	?	?	?	?	?	?	?	?	?	?	?	?	?	?	?	?	?	?	?	?	?	?	?	?	?	no	no	no	#VALUE!
FBgn0003922	snRNA:U2:38ABa	small_nuclear_RNA_U2_at_38ABa	snRNA	2L	?	?	?	?	?	?	?	?	?	?	?	?	?	?	?	?	?	?	?	?	?	?	?	?	?	?	?	?	?	?	no	no	no	#VALUE!
FBgn0003923	snRNA:U2:38ABb	small_nuclear_RNA_U2_at_38ABb	snRNA	2L	?	?	?	?	?	?	?	?	?	?	?	?	?	?	?	?	?	?	?	?	?	?	?	?	?	?	?	?	?	?	no	no	no	#VALUE!
FBgn0003926	snRNA:U3:22A	small_nuclear_RNA_U3_at_22A	snRNA	2L	?	?	?	?	?	?	?	?	?	?	?	?	?	?	?	?	?	?	?	?	?	?	?	?	?	?	?	?	?	?	no	no	no	#VALUE!
FBgn0003930	snRNA:U4:39B	small_nuclear_RNA_U4_at_39B	snRNA	2L	?	?	?	?	?	?	?	?	?	?	?	?	?	?	?	?	?	?	?	?	?	?	?	?	?	?	?	?	?	?	no	no	no	#VALUE!
FBgn0003931	snRNA:U4:38AB	small_nuclear_RNA_U4_at_38AB	snRNA	2L	?	?	?	?	?	?	?	?	?	?	?	?	?	?	?	?	?	?	?	?	?	?	?	?	?	?	?	?	?	?	no	no	no	#VALUE!
FBgn0003933	snRNA:U5:14B	small_nuclear_RNA_U5_at_14B	snRNA	X	?	?	?	?	?	?	?	?	?	?	?	?	?	?	?	?	?	?	?	?	?	?	?	?	?	?	?	?	?	?	no	no	no	#VALUE!
FBgn0003934	snRNA:U5:23D	small_nuclear_RNA_U5_at_23DE	snRNA	2L	?	?	?	?	?	?	?	?	?	?	?	?	?	?	?	?	?	?	?	?	?	?	?	?	?	?	?	?	?	?	no	no	no	#VALUE!
FBgn0003935	snRNA:U5:34A	small_nuclear_RNA_U5_at_34AB	snRNA	2L	?	?	?	?	?	?	?	?	?	?	?	?	?	?	?	?	?	?	?	?	?	?	?	?	?	?	?	?	?	?	no	no	no	#VALUE!
FBgn0003936	snRNA:U5:35D	small_nuclear_RNA_U5_at_35EF	snRNA	2L	?	?	?	?	?	?	?	?	?	?	?	?	?	?	?	?	?	?	?	?	?	?	?	?	?	?	?	?	?	?	no	no	no	#VALUE!
FBgn0003938	snRNA:U5:63BC	small_nuclear_RNA_U5_at_63A	snRNA	3L	?	?	?	?	?	?	?	?	?	?	?	?	?	?	?	?	?	?	?	?	?	?	?	?	?	?	?	?	?	?	no	no	no	#VALUE!
FBgn0003941	RpL40	Ribosomal_protein_L40	protein_coding	2L	11661	21661	21608	18945	15836	22067	23392	11653.9	19765.1	19503.3	17834.3	18280.3	22221.7	24232.5	19070.2	0.660197	0.17907	3.6868	0.000227092	0.0406211	0.836248	0.179072	4.66989	3.01367e-06	0.000835324	0.176051	0.130543	1.34861	0.177463	1	yes	yes	no	1
FBgn0003942	RpS27A	Ribosomal_protein_S27A	protein_coding	2L	7428	8177	8806	7259	6567	9213	9486	7423.48	7461.31	7948.25	6833.43	7580.63	9277.57	9826.83	8050.22	-0.00653055	0.185484	-0.0352082	0.971914	1	0.248401	0.185478	1.33925	0.18049	0.949948	0.254932	0.135634	1.87956	0.0601687	1	no	no	no	0
FBgn0003943	Ubi-p63E	Ubiquitin-63E	protein_coding	3L	1206	1049	951	1092	713	805	837	1205.27	957.186	858.368	1027.98	823.053	810.642	867.073	935.653	-0.306694	0.225507	-1.36002	0.173824	1	-0.48311	0.225844	-2.13914	0.0324247	0.600591	-0.176417	0.168789	-1.04519	0.295934	1	no	no	no	0
FBgn0003944	Ubx	Ultrabithorax	protein_coding	3R	18	21	68	14	0	1	17	17.9891	19.162	61.3765	13.1792	0	1.00701	17.6108	18.6178	0.224504	0.273109	0.822029	0.41106	1	-0.24222	0.272538	-0.888758	0.374133	0.999669	-0.466724	0.33264	-1.40309	0.160591	1	no	no	no	0
FBgn0003950	unc	uncoordinated	protein_coding	X	64	88	151	83	71	126	30	63.9611	80.2978	136.292	78.134	81.959	126.883	31.0779	85.515	0.272186	0.390748	0.696576	0.486068	1	0.089233	0.390755	0.228361	0.819366	0.999669	-0.182953	0.389513	-0.469696	0.638572	1	no	no	no	0
FBgn0003961	Uro	Urate_oxidase	protein_coding	2L	0	6	0	16	176	0	14	0	5.47485	0	15.062	203.166	0	14.503	34.0294	-0.0448369	0.153402	-0.292284	0.77007	1	0.146781	0.1534	0.956847	0.338644	0.999669	0.191618	0.198515	0.965256	0.334416	1	no	no	no	0
FBgn0003963	ush	u-shaped	protein_coding	2L	2517	2982	3064	2385	3167	3127	2579	2515.47	2721	2765.55	2245.18	3655.83	3148.92	2671.66	2817.66	0.0240294	0.21822	0.110115	0.912318	1	0.304831	0.218201	1.39702	0.162408	0.935052	0.280802	0.161834	1.73513	0.0827185	1	no	no	no	0
FBgn0003964	usp	ultraspiracle	protein_coding	X	2468	2973	1749	1369	2222	2476	2248	2466.5	2712.79	1578.64	1288.74	2564.97	2493.35	2328.77	2204.82	-0.351219	0.291836	-1.20348	0.228791	1	0.0172812	0.291805	0.0592219	0.952775	0.999669	0.3685	0.227341	1.62091	0.105036	1	no	no	no	0
FBgn0003965	v	vermilion	protein_coding	X	5	6	0	26	15	0	0	4.99696	5.47485	0	24.4757	17.3153	0	0	7.46612	0.0592656	0.17805	0.33286	0.73924	1	-0.0141267	0.177885	-0.0794149	0.936703	NA	-0.0733924	0.228422	-0.321302	0.747981	NA	no	no	no	0
FBgn0003969	vap	vacuolar_peduncle	protein_coding	X	518	589	706	535	579	526	502	517.685	537.448	637.232	503.635	668.37	529.687	520.037	559.156	0.0917366	0.27939	0.328346	0.74265	1	0.122338	0.27955	0.437625	0.661658	0.999669	0.0306014	0.21524	0.142174	0.886943	1	no	no	no	0
FBgn0003975	vg	vestigial	protein_coding	2R	6	0	67	46	1	27	23	5.99635	0	60.4739	43.3032	1.15435	27.1892	23.8264	23.1348	0.2478	0.265394	0.933704	0.350457	1	0.0244616	0.265139	0.0922596	0.926492	0.999669	-0.223338	0.325405	-0.68634	0.492499	1	no	no	no	0
FBgn0003977	vir	virilizer	protein_coding	2R	785	743	928	679	551	844	787	784.523	677.969	837.608	639.193	636.048	849.916	815.277	748.648	-0.111553	0.270107	-0.412995	0.67961	1	-0.0232535	0.270198	-0.086061	0.931418	0.999669	0.0882995	0.206941	0.426688	0.669606	1	no	no	no	0
FBgn0003978	vls	valois	protein_coding	2L	227	317	302	238	136	326	200	226.862	289.255	272.584	224.047	156.992	328.285	207.186	243.601	0.151375	0.361774	0.418425	0.675636	1	0.00241912	0.362026	0.00668217	0.994668	0.999822	-0.148956	0.307307	-0.484715	0.627879	1	no	no	no	0
FBgn0003979	Vm26Aa	Vitelline_membrane_26Aa	protein_coding	2L	62	80	63	63	181	217	25	61.9623	72.998	56.8635	59.3065	208.938	218.521	25.8982	100.641	-0.134415	0.384096	-0.349951	0.726375	1	0.571414	0.384158	1.48745	0.136897	0.918778	0.705828	0.396989	1.77795	0.0754113	1	no	no	no	0
FBgn0003980	Vm26Ab	Vitelline_membrane_26Ab	protein_coding	2L	161	130	79	47	255	279	16	160.902	118.622	71.305	44.2446	294.36	280.956	16.5749	140.995	-0.434581	0.37524	-1.15814	0.246807	1	0.223959	0.375304	0.596741	0.55068	0.999669	0.65854	0.399232	1.64952	0.099042	1	no	no	no	0
FBgn0003983	Vm34Ca	Vitelline_membrane_34Ca	protein_coding	2L	163	104	91	54	223	252	19	162.901	94.8974	82.1362	50.8342	257.421	253.766	19.6827	131.663	-0.47529	0.38078	-1.2482	0.211958	1	0.158554	0.380833	0.416334	0.677166	0.999669	0.633843	0.398448	1.59078	0.111659	1	no	no	no	0
FBgn0003984	vn	vein	protein_coding	3L	381	380	496	315	256	413	459	380.768	346.74	447.687	296.533	295.514	415.895	475.492	379.804	-0.0570234	0.330012	-0.172792	0.862815	1	0.0493124	0.330093	0.149389	0.881246	0.999669	0.106336	0.267216	0.397939	0.690675	1	no	no	no	0
FBgn0003996	w	white	protein_coding	X	12	28	18	67	42	15	79	11.9927	25.5493	16.2467	63.072	48.4828	15.1051	81.8384	37.4696	0.215648	0.355984	0.605782	0.54466	1	0.428831	0.355983	1.20464	0.228343	0.985726	0.213182	0.395204	0.539424	0.589595	1	no	no	no	0
FBgn0003997	hid	head_involution_defective	protein_coding	3L	525	525	704	335	451	501	510	524.681	479.049	635.427	315.36	520.613	504.512	528.324	501.138	-0.11213	0.323811	-0.346282	0.729131	1	-0.00719232	0.323879	-0.0222068	0.982283	0.999669	0.104937	0.260359	0.403049	0.686913	1	no	no	no	0
FBgn0004003	wbl	windbeutel	protein_coding	2R	0	0	27	0	0	15	16	0	0	24.3701	0	0	15.1051	16.5749	8.00715	0.045156	0.168001	0.268785	0.788095	1	0.0798083	0.167921	0.475274	0.634592	NA	0.0346523	0.21638	0.160145	0.872767	NA	no	no	no	0
FBgn0004009	wg	wingless	protein_coding	2L	8	110	421	39	63	13	190	7.99513	100.372	379.993	36.7136	72.7242	13.0911	196.827	115.388	0.691851	0.356993	1.938	0.0526237	1	0.287407	0.356867	0.805363	0.42061	0.999669	-0.404444	0.395455	-1.02273	0.306435	1	no	no	no	0
FBgn0004028	wupA	wings_up_A	protein_coding	X	136	114	19	3	73	135	159	135.917	104.022	17.1493	2.82412	84.2677	135.946	164.713	92.1199	-0.54741	0.356061	-1.5374	0.124194	1	0.1068	0.356183	0.299847	0.764294	0.999669	0.65421	0.394954	1.65642	0.0976364	1	no	no	no	0
FBgn0004034	y	yellow	protein_coding	X	0	0	166	5	0	0	3	0	0	149.831	4.70687	0	0	3.10779	22.5208	0.106579	0.125238	0.851013	NA	NA	-0.0406027	0.125213	-0.324269	NA	NA	-0.147182	0.163295	-0.901326	NA	NA	no	no	no	0
FBgn0004045	Yp1	Yolk_protein_1	protein_coding	X	16	69	28	16	111	63	21	15.9903	62.9608	25.2727	15.062	128.133	63.4416	21.7545	47.5164	0.0844755	0.361794	0.233491	0.81538	1	0.574448	0.361927	1.58719	0.112469	0.903596	0.489972	0.397224	1.23349	0.217392	1	no	no	no	0
FBgn0004047	Yp3	Yolk_protein_3	protein_coding	X	42	46	52	64	103	43	24	41.9745	41.9738	46.9349	60.2479	118.898	43.3014	24.8623	54.0276	0.0392128	0.380027	0.103184	0.917817	1	0.212729	0.380015	0.559792	0.575621	0.999669	0.173517	0.398584	0.435333	0.663321	1	no	no	no	0
FBgn0004049	yrt	yurt	protein_coding	3R	1105	1339	1384	986	799	1071	950	1104.33	1221.8	1249.19	928.194	922.327	1078.51	984.133	1069.78	0.0387978	0.244395	0.15875	0.873866	1	-0.138003	0.244639	-0.564107	0.572681	0.999669	-0.1768	0.184168	-0.959996	0.337057	1	no	no	no	0
FBgn0004050	z	zeste	protein_coding	X	285	228	450	354	143	338	189	284.827	208.044	406.168	333.246	165.072	340.369	195.791	276.217	0.130577	0.3709	0.352053	0.724798	1	-0.214413	0.37118	-0.577652	0.563499	0.999669	-0.34499	0.321407	-1.07337	0.283104	1	no	no	no	0
FBgn0004052	Z600	Z600	protein_coding	3L	0	0	0	0	0	0	0	?	?	?	?	?	?	?	?	?	?	?	?	?	?	?	?	?	?	?	?	?	?	?	no	no	no	#VALUE!
FBgn0004053	zen	zerknullt	protein_coding	3R	127	245	181	218	215	92	369	126.923	223.556	163.37	205.219	248.186	92.6448	382.258	206.022	0.281898	0.3895	0.723742	0.469224	1	0.490413	0.389502	1.25908	0.208003	0.973953	0.208515	0.359649	0.579772	0.562068	1	no	no	no	0
FBgn0004054	zen2	zerknullt-related	protein_coding	3R	0	0	0	0	0	0	0	?	?	?	?	?	?	?	?	?	?	?	?	?	?	?	?	?	?	?	?	?	?	?	no	no	no	#VALUE!
FBgn0004055	uzip	unzipped	protein_coding	2R	161	119	157	71	103	204	75	160.902	108.585	141.707	66.8375	118.898	205.43	77.6947	125.722	-0.336521	0.391771	-0.858974	0.390355	1	-0.101262	0.391764	-0.258477	0.796039	0.999669	0.235259	0.368616	0.638223	0.523328	1	no	no	no	0
FBgn0004057	Zw	Zwischenferment	protein_coding	X	133	74	201	75	123	111	71	132.919	67.5231	181.422	70.603	141.985	111.778	73.551	111.397	-0.152761	0.392814	-0.388889	0.697358	1	-0.130463	0.392854	-0.332092	0.73982	0.999669	0.0222977	0.377324	0.0590943	0.952877	1	no	no	no	0
FBgn0004066	Prosalpha4	Proteasome_alpha4_subunit	protein_coding	X	341	244	203	216	204	337	247	340.793	222.644	183.227	203.337	235.488	339.362	255.875	254.389	-0.582085	0.333454	-1.74562	0.0808766	1	-0.194863	0.333256	-0.584724	0.558733	0.999669	0.387222	0.271891	1.42418	0.154393	1	no	no	no	0
FBgn0004087	Dhfr	Dihydrofolate_reductase	protein_coding	3R	23	8	33	29	22	0	23	22.986	7.2998	29.7856	27.2998	25.3957	0	23.8264	19.5133	0.00976705	0.28452	0.0343282	0.972615	1	-0.0834596	0.284267	-0.293595	0.769067	0.999669	-0.0932267	0.343606	-0.271319	0.786146	1	no	no	no	0
FBgn0004101	bs	blistered	protein_coding	2R	763	887	643	728	583	797	785	762.536	809.365	580.369	685.32	672.987	802.586	813.205	732.338	-0.125286	0.26705	-0.469148	0.638964	1	0.0064793	0.267112	0.0242569	0.980648	0.999669	0.131765	0.204132	0.645489	0.51861	1	no	no	no	0
FBgn0004102	oc	ocelliless	protein_coding	X	15	14	23	6	3	10	13	14.9909	12.7746	20.7597	5.64824	3.46306	10.0701	13.4671	11.5962	0.00227966	0.301762	0.00755451	0.993972	1	-0.142114	0.301189	-0.471844	0.637038	NA	-0.144394	0.358633	-0.402623	0.687225	NA	no	no	no	0
FBgn0004103	Pp1-87B	Protein_phosphatase_1_at_87B	protein_coding	3R	15393	21646	20327	17845	17854	19104	19915	15383.6	19751.4	18347.1	16798.8	20609.8	19237.9	20630.5	18679.9	0.237702	0.15148	1.5692	0.116602	1	0.374694	0.151486	2.47346	0.0133811	0.395441	0.136992	0.109443	1.25171	0.210675	1	no	no	no	0
FBgn0004106	Cdk1	Cyclin-dependent_kinase_1	protein_coding	2L	1780	1932	2256	1901	1447	2117	2217	1778.92	1762.9	2036.25	1789.55	1670.35	2131.84	2296.66	1923.78	0.0564119	0.223658	0.252224	0.800868	1	0.176916	0.223695	0.790881	0.429014	0.999669	0.120504	0.16635	0.724405	0.468817	1	no	no	no	0
FBgn0004107	Cdk2	Cyclin-dependent_kinase_2	protein_coding	3R	1064	1045	1148	1003	819	962	984	1063.35	953.536	1036.18	944.198	945.414	968.743	1019.35	990.111	-0.109634	0.215192	-0.509471	0.610422	1	-0.109764	0.215374	-0.509642	0.610302	0.999669	-0.000129695	0.159729	-0.000811968	0.999352	1	no	no	no	0
FBgn0004108	Nrt	Neurotactin	protein_coding	3L	6102	6572	5349	3335	3811	5712	5119	6098.29	5996.79	4827.98	3139.48	4399.24	5752.04	5302.92	5073.82	-0.338241	0.265538	-1.27379	0.202737	1	-0.202126	0.265547	-0.761167	0.446557	0.999669	0.136115	0.202723	0.671433	0.501944	1	no	no	no	0
FBgn0004110	tin	tinman	protein_coding	3R	14	0	12	3	11	34	15	13.9915	0	10.8311	2.82412	12.6979	34.2383	15.5389	12.8746	-0.250718	0.272881	-0.918781	0.35821	1	0.188836	0.273152	0.691322	0.489363	NA	0.439554	0.332834	1.32064	0.186621	NA	no	no	no	0
FBgn0004117	Tm2	Tropomyosin_2	protein_coding	3R	20	1	0	10	27	11	33	19.9878	0.912475	0	9.41374	31.1675	11.0771	34.1857	15.2492	-0.353923	0.276287	-1.281	0.200195	1	0.185342	0.276642	0.669971	0.502876	0.999669	0.539265	0.336052	1.60471	0.108558	NA	no	no	no	0
FBgn0004118	nAChRbeta2	nicotinic_Acetylcholine_Receptor_beta2	protein_coding	3R	15	23	0	133	19	13	3	14.9909	20.9869	0	125.203	21.9327	13.0911	3.10779	28.4732	0.299706	0.274077	1.09351	0.27417	1	-0.130339	0.273725	-0.476167	0.633955	0.999669	-0.430045	0.333791	-1.28837	0.197619	1	no	no	no	0
FBgn0004132	boca	boca	protein_coding	2R	305	173	183	249	193	155	179	304.814	157.858	165.175	234.402	222.79	156.086	185.431	203.794	-0.496866	0.354742	-1.40064	0.161322	1	-0.4824	0.354947	-1.35908	0.174122	0.949948	0.0144655	0.29862	0.0484412	0.961365	1	no	no	no	0
FBgn0004133	blow	blown_fuse	protein_coding	2R	922	1243	1198	1214	806	1069	1110	921.439	1134.21	1081.31	1142.83	930.408	1076.49	1149.88	1062.37	0.255085	0.223236	1.14267	0.253175	1	0.170091	0.223452	0.761199	0.446538	0.999669	-0.0849936	0.165815	-0.512581	0.608244	1	no	no	no	0
FBgn0004143	nullo	nullo	protein_coding	X	0	0	0	0	0	0	0	?	?	?	?	?	?	?	?	?	?	?	?	?	?	?	?	?	?	?	?	?	?	?	no	no	no	#VALUE!
FBgn0004167	kst	karst	protein_coding	3L	5962	5333	4344	4824	4154	5656	5533	5958.37	4866.23	3920.87	4541.19	4795.18	5695.64	5731.8	5072.75	-0.399691	0.188542	-2.11991	0.0340138	1	-0.124854	0.188529	-0.662252	0.507809	0.999669	0.274837	0.13818	1.98898	0.0467031	1	no	no	no	0
FBgn0004168	5-HT1A	5-hydroxytryptamine_(serotonin)_receptor_1A	protein_coding	2R	14	29	52	46	49	14	26	13.9915	26.4618	46.9349	43.3032	56.5633	14.0981	26.9342	32.6124	0.360225	0.36587	0.98457	0.324836	1	0.23329	0.365646	0.638022	0.52346	0.999669	-0.126934	0.39828	-0.318707	0.749949	1	no	no	no	0
FBgn0004169	up	upheld	protein_coding	X	270	131	40	38	136	219	473	269.836	119.534	36.1038	35.7722	156.992	220.535	489.995	189.824	-1.11245	0.392824	-2.83194	0.00462671	0.396486	0.24525	0.392716	0.624495	0.532302	0.999669	1.3577	0.382487	3.54967	0.000385708	0.138818	no	no	no	0
FBgn0004170	sc	scute	protein_coding	X	30	21	315	2	6	21	61	29.9818	19.162	284.317	1.88275	6.92611	21.1472	63.1917	60.9441	0.371972	0.303363	1.22616	0.220139	1	-0.127023	0.303129	-0.41904	0.675187	0.999669	-0.498995	0.360344	-1.38477	0.166122	1	no	no	no	0
FBgn0004171	Mst98Cb	Male-specific_RNA_98Cb	protein_coding	3R	8	3	0	0	12	0	9	7.99513	2.73742	0	0	13.8522	0	9.32337	4.84402	-0.137196	0.173903	-0.788926	0.430155	1	0.045897	0.173876	0.263964	0.791808	NA	0.183093	0.223446	0.819409	0.412553	NA	no	no	no	0
FBgn0004172	Mst84Da	Male-specific_RNA_84Da	protein_coding	3R	0	0	0	2	0	0	0	0	0	0	1.88275	0	0	0	0.268964	0.046841	0.115139	0.40682	0.68414	NA	0	0.115139	0	1	NA	-0.0631302	0.150485	-0.419513	0.674841	NA	no	no	no	0
FBgn0004173	Mst84Db	Male-specific_RNA_84Db	protein_coding	3R	0	0	0	0	0	0	0	?	?	?	?	?	?	?	?	?	?	?	?	?	?	?	?	?	?	?	?	?	?	?	no	no	no	#VALUE!
FBgn0004174	Mst84Dc	Male-specific_RNA_84Dc	protein_coding	3R	0	0	0	5	0	0	0	0	0	0	4.70687	0	0	0	0.67241	0.0948014	0.117582	0.806256	0.420095	NA	0	0.116927	0	1	NA	-0.13229	0.153287	-0.863021	0.388126	NA	no	no	no	0
FBgn0004175	Mst84Dd	Male-specific_RNA_84Dd	protein_coding	3R	0	0	0	0	0	0	0	?	?	?	?	?	?	?	?	?	?	?	?	?	?	?	?	?	?	?	?	?	?	?	no	no	no	#VALUE!
FBgn0004177	mts	microtubule_star	protein_coding	2L	4093	4323	4669	3771	3332	3666	3283	4090.51	3944.63	4214.22	3549.92	3846.3	3691.7	3400.96	3819.75	-0.0619849	0.176624	-0.350943	0.725631	1	-0.157562	0.176716	-0.89161	0.372602	0.999669	-0.0955769	0.128859	-0.741715	0.45826	1	no	no	no	0
FBgn0004179	Csp	Cysteine_string_protein	protein_coding	3L	4346	4353	5257	4509	3495	4113	3862	4343.36	3972	4744.94	4244.65	4034.46	4141.83	4000.76	4211.72	-0.00579015	0.16915	-0.0342309	0.972693	1	-0.0936757	0.169236	-0.553521	0.579907	0.999669	-0.0878855	0.123038	-0.714294	0.475046	1	no	no	no	0
FBgn0004181	Peb	Protein_ejaculatory_bulb	protein_coding	2R	0	0	0	0	0	0	0	?	?	?	?	?	?	?	?	?	?	?	?	?	?	?	?	?	?	?	?	?	?	?	no	no	no	#VALUE!
FBgn0004183	snRNA:U1:82Eb	small_nuclear_RNA_U1_at_82Eb	snRNA	3R	?	?	?	?	?	?	?	?	?	?	?	?	?	?	?	?	?	?	?	?	?	?	?	?	?	?	?	?	?	?	no	no	no	#VALUE!
FBgn0004185	snRNA:U1:95Ca	small_nuclear_RNA_U1_at_95Ca	snRNA	3R	?	?	?	?	?	?	?	?	?	?	?	?	?	?	?	?	?	?	?	?	?	?	?	?	?	?	?	?	?	?	no	no	no	#VALUE!
FBgn0004186	snRNA:U1:95Cb	small_nuclear_RNA_U1_at_95Cb	snRNA	3R	?	?	?	?	?	?	?	?	?	?	?	?	?	?	?	?	?	?	?	?	?	?	?	?	?	?	?	?	?	?	no	no	no	#VALUE!
FBgn0004187	snRNA:U1:95Cc	small_nuclear_RNA_U1_at_95Cc	snRNA	3R	?	?	?	?	?	?	?	?	?	?	?	?	?	?	?	?	?	?	?	?	?	?	?	?	?	?	?	?	?	?	no	no	no	#VALUE!
FBgn0004188	snRNA:U6:96Aa	small_nuclear_RNA_U6_at_96Aa	snRNA	3R	?	?	?	?	?	?	?	?	?	?	?	?	?	?	?	?	?	?	?	?	?	?	?	?	?	?	?	?	?	?	no	no	no	#VALUE!
FBgn0004189	snRNA:U6:96Ab	small_nuclear_RNA_U6_at_96Ab	snRNA	3R	?	?	?	?	?	?	?	?	?	?	?	?	?	?	?	?	?	?	?	?	?	?	?	?	?	?	?	?	?	?	no	no	no	#VALUE!
FBgn0004190	snRNA:U6:96Ac	small_nuclear_RNA_U6_at_96Ac	snRNA	3R	?	?	?	?	?	?	?	?	?	?	?	?	?	?	?	?	?	?	?	?	?	?	?	?	?	?	?	?	?	?	no	no	no	#VALUE!
FBgn0004191	snRNA:U2:34ABa	small_nuclear_RNA_U2_at_34ABa	snRNA	2L	?	?	?	?	?	?	?	?	?	?	?	?	?	?	?	?	?	?	?	?	?	?	?	?	?	?	?	?	?	?	no	no	no	#VALUE!
FBgn0004192	snRNA:U2:34ABb	small_nuclear_RNA_U2_at_34ABb	snRNA	2L	?	?	?	?	?	?	?	?	?	?	?	?	?	?	?	?	?	?	?	?	?	?	?	?	?	?	?	?	?	?	no	no	no	#VALUE!
FBgn0004197	Ser	Serrate	protein_coding	3R	327	207	211	199	173	140	69	326.801	188.882	190.448	187.333	199.703	140.981	71.4791	186.518	-0.449117	0.379675	-1.1829	0.23685	1	-0.79772	0.380013	-2.09919	0.0357998	0.616052	-0.348604	0.337521	-1.03284	0.30168	1	no	no	no	0
FBgn0004198	ct	cut	protein_coding	X	961	1044	1130	846	1314	1017	1217	960.415	952.624	1019.93	796.402	1516.82	1024.13	1260.73	1075.86	-0.0666091	0.261717	-0.254508	0.799103	1	0.359953	0.261604	1.37595	0.168838	0.949948	0.426562	0.198971	2.14384	0.0320456	1	no	no	no	0
FBgn0004227	nonA	no_on_or_off_transient_A	protein_coding	X	365	265	269	217	213	326	137	364.778	241.806	242.798	204.278	245.877	328.285	141.922	252.821	-0.449129	0.363484	-1.23562	0.216599	1	-0.403639	0.363599	-1.11012	0.266947	0.999669	0.0454898	0.310393	0.146555	0.883483	1	no	no	no	0
FBgn0004228	mex1	midgut_expression_1	protein_coding	3L	42	0	0	0	0	0	0	41.9745	0	0	0	0	0	0	5.99635	-0.27871	0.146994	-1.89607	0.0579509	1	-0.278326	0.14689	-1.89479	0.0581199	NA	0	0.190308	0	1	NA	no	no	no	0
FBgn0004237	Hrb87F	Heterogeneous_nuclear_ribonucleoprotein_at_87F	protein_coding	3R	2916	3080	3237	2679	1912	2768	3204	2914.23	2810.42	2921.7	2521.94	2207.12	2787.4	3319.12	2783.13	-0.0746639	0.227117	-0.328746	0.742348	1	-0.0646223	0.227174	-0.284462	0.776056	0.999669	0.0100415	0.169394	0.0592794	0.95273	1	no	no	no	0
FBgn0004240	Dpt	Diptericin	protein_coding	2R	59	279	22	6	65	0	2370	58.9641	254.581	19.8571	5.64824	75.0329	0	2455.15	409.891	-0.0659467	0.179413	-0.367568	NA	NA	0.187824	0.179414	1.04688	NA	NA	0.253771	0.230125	1.10275	NA	NA	no	no	no	0
FBgn0004242	Syt1	Synaptotagmin_1	protein_coding	2L	89	483	187	523	274	157	189	88.9459	440.725	168.785	492.338	316.293	158.1	195.791	265.854	1.12874	0.384316	2.937	0.00331407	0.319022	0.581121	0.384545	1.51119	0.13074	0.914119	-0.547614	0.345732	-1.58393	0.113211	1	no	no	no	0
FBgn0004244	Rdl	Resistant_to_dieldrin	protein_coding	3L	1	7	12	3	0	1	7	0.999392	6.38732	10.8311	2.82412	0	1.00701	7.25151	4.18579	0.153606	0.204094	0.752627	0.451674	1	-0.00826241	0.203517	-0.040598	0.967616	NA	-0.161869	0.259002	-0.624971	0.53199	NA	no	no	no	0
FBgn0004359	T48	Transcript_48	protein_coding	3R	84	89	89	160	74	51	63	83.9489	81.2103	80.331	150.62	85.4221	51.3575	65.2636	85.4504	0.214552	0.392107	0.547178	0.584257	1	-0.214715	0.39236	-0.54724	0.584214	0.999669	-0.429267	0.371357	-1.15594	0.247705	1	no	no	no	0
FBgn0004360	Wnt2	Wnt_oncogene_analog_2	protein_coding	2R	33	44	76	49	14	52	38	32.9799	40.1489	68.5972	46.1273	16.1609	52.3645	39.3653	42.2492	0.260739	0.380213	0.68577	0.492858	1	-0.0172813	0.380029	-0.0454737	0.96373	0.999669	-0.27802	0.398555	-0.697571	0.485446	1	no	no	no	0
FBgn0004362	HmgD	High_mobility_group_protein_D	protein_coding	2R	27432	25811	25664	24897	18447	23070	27606	27415.3	23551.9	23164.2	23437.4	21294.3	23231.7	28597.9	24384.7	-0.216486	0.177715	-1.21817	0.22316	1	-0.158259	0.177722	-0.890486	0.373205	0.999669	0.0582274	0.129626	0.449195	0.653291	1	no	no	no	0
FBgn0004363	porin	porin	protein_coding	2L	2194	2536	2762	2575	1784	2579	1833	2192.67	2314.04	2492.97	2424.04	2059.36	2597.08	1898.86	2282.72	0.12773	0.213312	0.598795	0.54931	1	-0.00791587	0.213441	-0.037087	0.970416	0.999669	-0.135646	0.157938	-0.858857	0.39042	1	no	no	no	0
FBgn0004364	18w	18_wheeler	protein_coding	2R	1432	1188	1465	1288	790	1162	896	1431.13	1084.02	1322.3	1212.49	911.938	1170.14	928.193	1151.46	-0.21041	0.237997	-0.88409	0.376648	1	-0.461539	0.238291	-1.93687	0.0527612	0.733835	-0.251128	0.179063	-1.40246	0.160779	1	no	no	no	0
FBgn0004367	mei-41	meiotic_41	protein_coding	X	149	148	103	146	145	127	54	148.909	135.046	92.9673	137.441	167.381	127.89	55.9402	123.654	-0.142644	0.39111	-0.364715	0.715324	1	-0.183084	0.391201	-0.468004	0.639782	0.999669	-0.0404396	0.365832	-0.110542	0.91198	1	no	no	no	0
FBgn0004368	Ptp4E	Protein_tyrosine_phosphatase_4E	protein_coding	X	692	794	719	586	635	618	564	691.579	724.505	648.966	551.645	733.014	622.332	584.264	650.901	-0.0919673	0.26866	-0.342318	0.732111	1	-0.0823185	0.268832	-0.306208	0.759446	0.999669	0.00964878	0.205711	0.0469045	0.962589	1	no	no	no	0
FBgn0004369	Ptp99A	Protein_tyrosine_phosphatase_99A	protein_coding	3R	2542	2384	2800	1658	1480	1977	1918	2540.45	2175.34	2527.27	1560.8	1708.44	1990.86	1986.91	2070.01	-0.242636	0.24901	-0.9744	0.329858	1	-0.373779	0.249121	-1.50039	0.133512	0.917137	-0.131144	0.188241	-0.69668	0.486003	1	no	no	no	0
FBgn0004370	Ptp10D	Protein_tyrosine_phosphatase_10D	protein_coding	X	872	1169	1375	1000	841	928	1089	871.47	1066.68	1241.07	941.374	970.81	934.504	1128.13	1022.01	0.278596	0.243724	1.14308	0.253007	1	0.184932	0.243921	0.758163	0.448353	0.999669	-0.0936637	0.183135	-0.511447	0.609038	1	no	no	no	0
FBgn0004372	aly	always_early	protein_coding	3L	4	0	14	0	0	0	21	3.99757	0	12.6363	0	0	0	21.7545	5.48406	-0.0118716	0.146029	-0.0812957	0.935207	1	0.0359956	0.145958	0.246617	0.805205	NA	0.0478672	0.189352	0.252794	0.800427	NA	no	no	no	0
FBgn0004373	fwd	four_wheel_drive	protein_coding	3L	2649	2399	2724	2809	1919	2368	2122	2647.39	2189.03	2458.67	2644.32	2215.2	2384.6	2198.24	2391.06	-0.112871	0.188129	-0.599967	0.548528	1	-0.210848	0.188266	-1.11995	0.262734	0.999669	-0.0979773	0.137951	-0.710231	0.477561	1	no	no	no	0
FBgn0004374	neb	nebbish	protein_coding	2L	53	61	72	16	17	102	77	52.9678	55.661	64.9868	15.062	19.624	102.715	79.7666	55.8262	-0.118609	0.369569	-0.320938	0.748257	1	0.156946	0.369592	0.424647	0.671094	0.999669	0.275555	0.398867	0.690845	0.489663	1	no	no	no	0
FBgn0004378	Klp61F	Kinesin-like_protein_at_61F	protein_coding	3L	1257	1171	1044	1152	1082	1304	1328	1256.24	1068.51	942.309	1084.46	1249.01	1313.14	1375.71	1184.2	-0.267279	0.211715	-1.26245	0.206788	1	0.066262	0.211627	0.313107	0.754199	0.999669	0.333541	0.156737	2.12803	0.0333345	1	no	no	no	0
FBgn0004379	Klp67A	Kinesin-like_protein_at_67A	protein_coding	3L	247	196	308	195	229	189	253	246.85	178.845	277.999	183.568	264.347	190.325	262.09	229.146	-0.156056	0.353222	-0.441807	0.658629	1	-0.020787	0.353292	-0.0588379	0.953081	0.999669	0.135269	0.295686	0.457476	0.647329	1	no	no	no	0
FBgn0004380	Klp64D	Kinesin-like_protein_at_64D	protein_coding	3L	20	20	10	15	38	18	0	19.9878	18.2495	9.02595	14.1206	43.8654	18.1262	0	17.6251	-0.0940971	0.278698	-0.337631	0.735642	1	0.0389645	0.278628	0.139844	0.888783	0.999669	0.133062	0.338264	0.393365	0.69405	NA	no	no	no	0
FBgn0004381	Klp68D	Kinesin-like_protein_at_68D	protein_coding	3L	134	278	230	162	222	228	175	133.918	253.668	207.597	152.503	256.266	229.598	181.288	202.12	0.38961	0.35923	1.08457	0.278112	1	0.488794	0.359329	1.3603	0.173736	0.949948	0.099184	0.302658	0.327709	0.743132	1	no	no	no	0
FBgn0004387	Klp98A	Kinesin-like_protein_at_98A	protein_coding	3R	556	596	762	644	532	395	527	555.662	543.835	687.777	606.245	614.115	397.769	545.935	564.477	0.125905	0.294738	0.427174	0.669252	1	-0.0913072	0.295065	-0.309448	0.756981	0.999669	-0.217212	0.230257	-0.943343	0.345506	1	no	no	no	0
FBgn0004389	bnk	bottleneck	protein_coding	3R	0	0	0	0	0	0	0	?	?	?	?	?	?	?	?	?	?	?	?	?	?	?	?	?	?	?	?	?	?	?	no	no	no	#VALUE!
FBgn0004390	RasGAP1	Ras_GTPase_activating_protein_1	protein_coding	3L	928	964	1044	795	686	840	787	927.436	879.626	942.309	748.392	791.886	845.888	815.277	850.116	-0.0990962	0.237706	-0.416885	0.676763	1	-0.162882	0.237938	-0.684557	0.493624	0.999669	-0.0637859	0.17858	-0.357183	0.720955	1	no	no	no	0
FBgn0004391	shtd	shattered	protein_coding	X	516	476	442	407	346	534	252	515.686	434.338	398.947	383.139	399.406	537.743	261.054	418.616	-0.255208	0.334043	-0.763998	0.444868	1	-0.273844	0.334199	-0.819403	0.412557	0.999669	-0.0186354	0.272266	-0.0684456	0.945431	1	no	no	no	0
FBgn0004394	pdm2	POU_domain_protein_2	protein_coding	2L	0	20	15	0	17	0	14	0	18.2495	13.5389	0	19.624	0	14.503	9.41649	0.0905376	0.203625	0.444629	0.656588	1	0.104066	0.203491	0.511403	0.609069	NA	0.0135282	0.258641	0.0523048	0.958286	NA	no	no	no	0
FBgn0004395	unk	unkempt	protein_coding	3R	812	585	847	569	471	594	804	811.506	533.798	764.498	535.642	543.7	598.163	832.887	660.028	-0.331815	0.303145	-1.09458	0.273702	1	-0.235593	0.303217	-0.776979	0.437171	0.999669	0.0962219	0.238877	0.402809	0.687089	1	no	no	no	0
FBgn0004396	CrebA	Cyclic-AMP_response_element_binding_protein_A	protein_coding	3L	465	864	1926	985	951	1021	922	464.717	788.378	1738.4	927.253	1097.79	1028.16	955.127	999.974	0.989782	0.321266	3.08088	0.00206387	0.239884	0.843494	0.321375	2.62464	0.0086741	0.305999	-0.146288	0.256626	-0.570045	0.568647	1	no	no	no	0
FBgn0004397	Vinc	Vinculin	protein_coding	X	2731	3688	3172	3021	2987	2967	3225	2729.34	3365.21	2863.03	2843.89	3448.05	2987.8	3340.87	3082.6	0.135705	0.1877	0.722986	0.469688	1	0.240221	0.187736	1.27956	0.200699	0.965069	0.104516	0.137278	0.761343	0.446452	1	no	no	no	0
FBgn0004400	rhi	rhino	protein_coding	2R	92	175	196	202	175	164	181	91.944	159.683	176.909	190.157	202.012	165.149	187.503	167.623	0.617868	0.35237	1.75346	0.0795223	1	0.680248	0.352547	1.92952	0.0536659	0.73717	0.0623805	0.29218	0.2135	0.830937	1	no	no	no	0
FBgn0004401	Pep	Protein_on_ecdysone_puffs	protein_coding	3L	4866	4262	5037	3690	3361	4008	3623	4863.04	3888.97	4546.37	3473.67	3879.78	4036.09	3753.17	4063.01	-0.272006	0.188926	-1.43975	0.149938	1	-0.300479	0.188989	-1.58993	0.11185	0.903259	-0.028473	0.138551	-0.205505	0.837178	1	no	no	no	0
FBgn0004403	RpS14a	Ribosomal_protein_S14a	protein_coding	X	3230	3534	4015	4104	3154	3903	4722	3228.04	3224.69	3623.92	3863.4	3640.83	3930.36	4891.66	3771.84	0.128084	0.206626	0.619884	0.535334	1	0.338337	0.206627	1.63743	0.101541	0.879534	0.210252	0.152372	1.37986	0.167629	1	no	no	no	0
FBgn0004404	RpS14b	Ribosomal_protein_S14b	protein_coding	X	2654	3814	3905	4020	3492	4185	4704	2652.39	3480.18	3524.63	3784.32	4031	4214.33	4873.01	3794.27	0.406966	0.178595	2.27871	0.0226846	0.943978	0.68142	0.178578	3.8158	0.000135741	0.0184822	0.274454	0.12987	2.1133	0.0345751	1	no	yes	no	1
FBgn0004406	tam	tamas	protein_coding	2L	109	95	65	80	52	18	50	108.934	86.6851	58.6687	75.3099	60.0263	18.1262	51.7965	65.6495	-0.178089	0.390671	-0.455854	0.648495	1	-0.625495	0.39067	-1.60108	0.109359	0.903259	-0.447406	0.39074	-1.14502	0.2522	1	no	no	no	0
FBgn0004407	DNApol-gamma35	DNA_polymerase_gamma_35kD	protein_coding	2L	0	0	0	0	0	0	0	?	?	?	?	?	?	?	?	?	?	?	?	?	?	?	?	?	?	?	?	?	?	?	no	no	no	#VALUE!
FBgn0004414	msopa	male-specific_opa_containing_gene	protein_coding	3L	25	0	0	2	0	1	0	24.9848	0	0	1.88275	0	1.00701	0	3.98208	-0.270786	0.156914	-1.7257	0.0844013	1	-0.279204	0.156722	-1.78153	0.0748262	NA	-0.00841824	0.202352	-0.041602	0.966816	NA	no	no	no	0
FBgn0004419	me31B	maternal_expression_at_31B	protein_coding	2L	766	847	1068	816	619	731	841	765.534	772.866	963.972	768.161	714.544	736.124	871.217	798.917	0.112451	0.254971	0.441034	0.659189	1	0.0098358	0.255211	0.0385399	0.969257	0.999669	-0.102615	0.193212	-0.5311	0.595349	1	no	no	no	0
FBgn0004425	LysB	Lysozyme_B	protein_coding	3L	67	196	19	49	106	10	183	66.9592	178.845	17.1493	46.1273	122.361	10.0701	189.575	90.1554	0.0155165	0.348624	0.0445076	0.9645	1	0.184276	0.348613	0.528596	0.597085	0.999669	0.168759	0.391668	0.430873	0.666561	1	no	no	no	0
FBgn0004426	LysC	Lysozyme_C	protein_coding	3L	17	0	6	14	4	0	22	16.9897	0	5.41557	13.1792	4.61741	0	22.7905	8.9989	-0.120118	0.213016	-0.56389	0.572829	1	-0.0560259	0.212895	-0.263163	0.792425	NA	0.0640918	0.269165	0.238114	0.811793	NA	no	no	no	0
FBgn0004427	LysD	Lysozyme_D	protein_coding	3L	214	251	71	48	195	78	399	213.87	229.031	64.0843	45.1859	225.099	78.5467	413.336	181.308	-0.443175	0.387187	-1.1446	0.252374	1	0.169142	0.387205	0.436827	0.662237	0.999669	0.612316	0.39492	1.55048	0.121026	1	no	no	no	0
FBgn0004428	LysE	Lysozyme_E	protein_coding	3L	3	10	8	2	45	0	33	2.99818	9.12475	7.22076	1.88275	51.9459	0	34.1857	15.3369	-0.087783	0.261391	-0.33583	0.736999	1	0.369202	0.261612	1.41125	0.15817	0.934575	0.456984	0.321738	1.42036	0.155502	NA	no	no	no	0
FBgn0004429	LysP	Lysozyme_P	protein_coding	3L	0	0	0	0	0	0	0	?	?	?	?	?	?	?	?	?	?	?	?	?	?	?	?	?	?	?	?	?	?	?	no	no	no	#VALUE!
FBgn0004430	LysS	Lysozyme_S	protein_coding	3L	5	21	0	2	2	0	13	4.99696	19.162	0	1.88275	2.3087	0	13.4671	5.97392	0.0340757	0.188497	0.180776	0.856543	1	-0.0087252	0.188281	-0.0463413	0.963038	NA	-0.0428009	0.240827	-0.177725	0.858939	NA	no	no	no	0
FBgn0004431	LysX	Lysozyme_X	protein_coding	3L	56	11	3	0	0	0	17	55.9659	10.0372	2.70779	0	0	0	17.6108	12.3317	-0.33474	0.206664	-1.61973	0.105291	1	-0.305843	0.206552	-1.48071	0.138684	NA	0.028897	0.261731	0.110407	0.912087	NA	no	no	no	0
FBgn0004432	Cyp1	Cyclophilin_1	protein_coding	X	3192	3734	4374	3429	3351	3527	4078	3190.06	3407.18	3947.95	3227.97	3868.23	3551.72	4224.52	3631.09	0.132271	0.189689	0.697305	0.485612	1	0.265805	0.189711	1.4011	0.161183	0.934575	0.133534	0.138858	0.96166	0.33622	1	no	no	no	0
FBgn0004435	Galphaq	G_protein_alpha_q_subunit	protein_coding	2R	302	338	355	211	273	241	256	301.816	308.417	320.421	198.63	315.138	242.689	265.198	278.901	-0.0931974	0.340033	-0.274083	0.78402	1	-0.100417	0.340233	-0.295141	0.767886	0.999669	-0.00721949	0.279184	-0.0258593	0.97937	1	no	no	no	0
FBgn0004436	Ubc6	Ubiquitin_conjugating_enzyme_6	protein_coding	3R	5148	5272	5436	5264	4493	4272	5434	5144.87	4810.57	4906.51	4955.39	5186.5	4301.94	5629.24	4990.72	-0.0690393	0.184228	-0.374749	0.707847	1	-0.0272263	0.184265	-0.147756	0.882535	0.999669	0.041813	0.134722	0.310364	0.756284	1	no	no	no	0
FBgn0004449	Ten-m	Tenascin_major	protein_coding	3L	3959	4766	3606	2245	4092	4462	3712	3956.59	4348.86	3254.76	2113.38	4723.61	4493.27	3845.37	3819.41	-0.260016	0.276234	-0.941288	0.346557	1	0.133976	0.27621	0.485051	0.62764	0.999669	0.393992	0.212466	1.85438	0.0636854	1	no	no	no	0
FBgn0004456	mew	multiple_edematous_wings	protein_coding	X	1287	1118	992	943	914	1027	1081	1286.22	1020.15	895.374	887.715	1055.08	1034.2	1119.84	1042.65	-0.422806	0.217575	-1.94326	0.0519843	1	-0.236142	0.217597	-1.08523	0.277821	0.999669	0.186663	0.161944	1.15264	0.249059	1	no	no	no	0
FBgn0004462	Pk17E	Protein_kinase-like_17E	protein_coding	X	88	74	155	58	76	35	50	87.9465	67.5231	139.902	54.5997	87.7308	35.2453	51.7965	74.9634	0.0546856	0.390757	0.139948	0.888701	1	-0.297837	0.390763	-0.762192	0.445945	0.999669	-0.352522	0.390022	-0.903852	0.366074	1	no	no	no	0
FBgn0004463	RpIII128	RNA_polymerase_III_128kD_subunit	protein_coding	2R	111	122	59	132	106	9	141	110.932	111.322	53.2531	124.261	122.361	9.06308	146.066	96.7513	-0.0557059	0.372021	-0.149739	0.880971	1	-0.0839136	0.37197	-0.225592	0.821519	0.999669	-0.0282076	0.399133	-0.0706723	0.943659	1	no	no	no	0
FBgn0004465	Su(P)	Suppressor_of_ref(2)P_sterility	protein_coding	3L	89	32	81	49	9	102	55	88.9459	29.1992	73.1102	46.1273	10.3892	102.715	56.9761	58.209	-0.272478	0.368573	-0.739278	0.459738	1	-0.181619	0.368527	-0.492824	0.622137	0.999669	0.0908592	0.398656	0.227914	0.819713	1	no	no	no	0
FBgn0004507	GlyP	Glycogen_phosphorylase	protein_coding	2L	1027	1458	1432	1460	1653	1056	1577	1026.38	1330.39	1292.52	1374.41	1908.14	1063.4	1633.66	1375.56	0.306617	0.273975	1.11914	0.263079	1	0.495403	0.273984	1.80815	0.0705839	0.798812	0.188786	0.209979	0.899069	0.368616	1	no	no	no	0
FBgn0004509	Fur1	Furin_1	protein_coding	3R	257	438	359	467	713	272	401	256.844	399.664	324.032	439.622	823.053	273.906	415.408	418.933	0.331512	0.368692	0.899158	0.368568	1	0.636817	0.368661	1.72738	0.0840995	0.844368	0.305305	0.317124	0.96273	0.335683	1	no	no	no	0
FBgn0004510	Ets97D	Ets_at_97D	protein_coding	3R	222	109	213	155	111	147	123	221.865	99.4598	192.253	145.913	128.133	148.03	127.419	151.868	-0.37253	0.373683	-0.996914	0.318806	1	-0.463536	0.373948	-1.23957	0.215134	0.973953	-0.0910056	0.326653	-0.2786	0.780552	1	no	no	no	0
FBgn0004511	dy	dusky	protein_coding	X	13	0	31	0	6	0	5	12.9921	0	27.9804	0	6.92611	0	5.17965	7.58261	-0.00237403	0.180017	-0.0131878	0.989478	1	-0.0975308	0.179835	-0.542334	0.587589	NA	-0.0951568	0.230693	-0.412482	0.679986	NA	no	no	no	0
FBgn0004512	Mdr49	Multi_drug_resistance_49	protein_coding	2R	4	36	5	20	17	20	51	3.99757	32.8491	4.51298	18.8275	19.624	20.1402	52.8324	21.8262	0.162387	0.330293	0.491646	0.62297	1	0.435235	0.330353	1.31748	0.187676	0.95275	0.272848	0.381368	0.715444	0.474335	1	no	no	no	0
FBgn0004513	Mdr65	Multiple_drug_resistance_65	protein_coding	3L	0	13	0	0	9	0	5	0	11.8622	0	0	10.3892	0	5.17965	3.91871	0.0298063	0.140521	0.212113	0.832019	1	0.0545416	0.140419	0.388421	0.697704	NA	0.0247354	0.182504	0.135533	0.89219	NA	no	no	no	0
FBgn0004514	Oct-TyrR	Octopamine-Tyramine_receptor	protein_coding	3L	26	43	18	28	23	1	40	25.9842	39.2364	16.2467	26.3585	26.5501	1.00701	41.4372	25.26	0.0303453	0.316457	0.0958906	0.923607	1	-0.0471257	0.316222	-0.149027	0.881532	0.999669	-0.0774709	0.370802	-0.208928	0.834504	1	no	no	no	0
FBgn0004516	Gad1	Glutamic_acid_decarboxylase_1	protein_coding	3L	0	5	0	0	0	0	30	0	4.56237	0	0	0	0	31.0779	5.09147	-0.0256486	0.132363	-0.193775	NA	NA	0.0998649	0.132331	0.754658	NA	NA	0.125514	0.172305	0.728438	NA	NA	no	no	no	0
FBgn0004552	Akh	Adipokinetic_hormone	protein_coding	3L	0	0	0	0	0	0	0	?	?	?	?	?	?	?	?	?	?	?	?	?	?	?	?	?	?	?	?	?	?	?	no	no	no	#VALUE!
FBgn0004554	Edg91	Ecdysone-dependent_gene_91	protein_coding	3R	0	0	0	0	0	0	0	?	?	?	?	?	?	?	?	?	?	?	?	?	?	?	?	?	?	?	?	?	?	?	no	no	no	#VALUE!
FBgn0004556	Dbp73D	Dead_box_protein_73D	protein_coding	3L	154	103	79	91	40	81	16	153.906	93.9849	71.305	85.665	46.1741	81.5677	16.5749	78.454	-0.318583	0.390062	-0.816751	0.414071	1	-0.773241	0.390042	-1.98246	0.047428	0.694507	-0.454658	0.39191	-1.16011	0.246004	1	no	no	no	0
FBgn0004567	slp2	sloppy_paired_2	protein_coding	2L	9	6	55	13	0	3	0	8.99453	5.47485	49.6427	12.2379	0	3.02103	0	11.3387	0.300382	0.251341	1.19512	0.232041	1	-0.275579	0.250412	-1.1005	0.271115	NA	-0.57596	0.310558	-1.8546	0.0636534	NA	no	no	no	0
FBgn0004569	aos	argos	protein_coding	3L	17	48	20	14	12	28	9	16.9897	43.7988	18.0519	13.1792	13.8522	28.1963	9.32337	20.4845	0.159876	0.338434	0.4724	0.636642	1	-0.0454118	0.33797	-0.134366	0.893113	0.999669	-0.205288	0.385963	-0.531885	0.594806	1	no	no	no	0
FBgn0004573	5-HT7	5-hydroxytryptamine_(serotonin)_receptor_7	protein_coding	3R	13	0	1	12	7	0	19	12.9921	0	0.902595	11.2965	8.08047	0	19.6827	7.5649	-0.124317	0.20146	-0.617081	0.537181	1	-0.00502018	0.201382	-0.0249286	0.980112	NA	0.119297	0.255972	0.466056	0.641175	NA	no	no	no	0
FBgn0004574	Rop	Ras_opposite	protein_coding	3L	292	315	369	296	361	456	326	291.822	287.43	333.058	278.647	416.721	459.196	337.713	343.512	0.00583059	0.309254	0.0188537	0.984958	1	0.393584	0.309069	1.27345	0.202858	0.968412	0.387754	0.244091	1.58856	0.112159	1	no	no	no	0
FBgn0004575	Syn	Synapsin	protein_coding	3R	0	18	0	1	0	24	0	0	16.4245	0	0.941374	0	24.1682	0	5.93345	0.0318492	0.151152	0.210709	0.833114	1	0.0670337	0.151073	0.443716	0.657248	NA	0.0351845	0.195727	0.179763	0.857338	NA	no	no	no	0
FBgn0004577	Pxd	Peroxidase	protein_coding	3R	20	79	10	4	39	31	0	19.9878	72.0855	9.02595	3.76549	45.0197	31.2173	0	25.8717	0.0598277	0.27119	0.220612	0.825395	1	0.0244604	0.271055	0.0902414	0.928095	0.999669	-0.0353674	0.331082	-0.106824	0.914929	1	no	no	no	0
FBgn0004580	Cbp53E	Calbindin_53E	protein_coding	2R	0	1	0	0	0	0	0	?	?	?	?	?	?	?	?	?	?	?	?	?	?	?	?	?	?	?	?	?	?	?	no	no	no	#VALUE!
FBgn0004581	bgcn	benign_gonial_cell_neoplasm	protein_coding	2R	353	448	576	437	404	533	531	352.785	408.789	519.895	411.38	466.358	536.736	550.079	463.717	0.268969	0.286073	0.94021	0.34711	1	0.464415	0.286091	1.62331	0.104522	0.890098	0.195447	0.220782	0.885245	0.376024	1	no	no	no	0
FBgn0004583	ex	expanded	protein_coding	2L	2782	602	1341	1015	586	906	699	2780.31	549.31	1210.38	955.494	676.45	912.35	724.115	1115.49	-1.26983	0.314335	-4.03975	5.35071e-05	0.0135266	-1.47405	0.314502	-4.68695	2.77307e-06	0.000797104	-0.20422	0.250951	-0.813786	0.415767	1	yes	yes	no	1
FBgn0004584	Rrp1	Recombination_repair_protein_1	protein_coding	2L	1752	1783	1712	1593	1220	1071	1511	1750.93	1626.94	1545.24	1499.61	1408.31	1078.51	1565.29	1496.4	-0.144103	0.235324	-0.612358	0.540301	1	-0.338917	0.235525	-1.43899	0.150154	0.932739	-0.194814	0.176567	-1.10334	0.269878	1	no	no	no	0
FBgn0004587	B52	B52	protein_coding	3R	21181	22202	20842	24592	16554	19205	20398	21168.1	20258.8	18811.9	23150.3	19109.1	19339.6	21130.9	20424.1	-0.0270671	0.163456	-0.165593	0.868477	1	-0.0882159	0.163473	-0.539637	0.589447	0.999669	-0.0611488	0.11862	-0.5155	0.606204	1	no	no	no	0
FBgn0004588	Eig71Ea	Ecdysone-induced_gene_71Ea	protein_coding	3L	0	0	0	7	0	0	0	0	0	0	6.58962	0	0	0	0.941374	0.0987381	0.119664	0.825126	0.4093	NA	0	0.119159	0	1	NA	-0.137892	0.156005	-0.883894	0.376753	NA	no	no	no	0
FBgn0004589	Eig71Eb	Ecdysone-induced_gene_71Eb	protein_coding	3L	0	0	0	9	0	0	0	0	0	0	8.47236	0	0	0	1.21034	0.101092	0.120878	0.836315	0.402978	1	0	0.120468	0	1	NA	-0.141247	0.157591	-0.896292	0.370097	NA	no	no	no	0
FBgn0004590	Eig71Ec	Ecdysone-induced_gene_71Ec	protein_coding	3L	2	23	0	402	0	0	0	1.99878	20.9869	0	378.432	0	0	0	57.3454	0.108608	0.125398	0.866105	NA	NA	-0.044926	0.125388	-0.358296	NA	NA	-0.153534	0.163504	-0.939022	NA	NA	no	no	no	0
FBgn0004591	Eig71Ed	Ecdysone-induced_gene_71Ed	protein_coding	3L	0	0	0	9	0	0	0	0	0	0	8.47236	0	0	0	1.21034	0.101092	0.120878	0.836315	0.402978	1	0	0.120468	0	1	NA	-0.141247	0.157591	-0.896292	0.370097	NA	no	no	no	0
FBgn0004592	Eig71Ee	Ecdysone-induced_gene_71Ee	protein_coding	3L	395	2291	62	883	92	106	729	394.76	2090.48	55.9609	831.233	106.2	106.743	755.193	620.081	0.274836	0.287861	0.954754	0.339702	1	-0.131447	0.287843	-0.456662	0.647914	0.999669	-0.406283	0.346822	-1.17145	0.24142	1	no	no	no	0
FBgn0004593	Eig71Ef	Ecdysone-induced_gene_71Ef	protein_coding	3L	0	0	0	0	0	0	0	?	?	?	?	?	?	?	?	?	?	?	?	?	?	?	?	?	?	?	?	?	?	?	no	no	no	#VALUE!
FBgn0004594	Eig71Eg	Ecdysone-induced_gene_71Eg	protein_coding	3L	0	0	0	4	0	0	0	0	0	0	3.76549	0	0	0	0.537928	0.0897771	0.116033	0.773719	0.439097	NA	0	0.11545	0	1	NA	-0.12392	0.151524	-0.817823	0.413458	NA	no	no	no	0
FBgn0004595	pros	prospero	protein_coding	3R	44	73	87	158	55	53	108	43.9732	66.6107	78.5258	148.737	63.4894	53.3715	111.88	80.9411	0.504094	0.392312	1.28493	0.198817	1	0.267899	0.39238	0.682754	0.494762	0.999669	-0.236195	0.382834	-0.616964	0.537258	1	no	no	no	0
FBgn0004597	CycC	Cyclin_C	protein_coding	3R	148	56	98	162	170	131	90	147.91	51.0986	88.4543	152.503	196.24	131.918	93.2337	123.051	-0.341855	0.392494	-0.870982	0.383764	1	0.0143376	0.392458	0.0365329	0.970857	0.999669	0.356193	0.372974	0.955007	0.339574	1	no	no	no	0
FBgn0004598	Fur2	Furin_2	protein_coding	X	793	964	745	907	632	716	562	792.518	879.626	672.433	853.826	729.551	721.019	582.192	747.309	0.0240003	0.264558	0.0907183	0.927716	1	-0.202436	0.264893	-0.764217	0.444738	0.999669	-0.226436	0.202077	-1.12054	0.262482	1	no	no	no	0
FBgn0004606	zfh1	Zn_finger_homeodomain_1	protein_coding	3R	39063	42701	38659	36064	32479	36603	35330	39039.2	38963.6	34893.4	33949.7	37492.2	36859.6	36599.4	36828.2	-0.115392	0.142112	-0.811979	0.416804	1	-0.0746141	0.142119	-0.52501	0.599576	0.999669	0.0407781	0.102453	0.398019	0.690616	1	no	no	no	0
FBgn0004607	zfh2	Zn_finger_homeodomain_2	protein_coding	4	156	138	484	283	67	52	183	155.905	125.922	436.856	266.409	77.3416	52.3645	189.575	186.339	0.516883	0.392709	1.3162	0.188108	1	-0.376877	0.392815	-0.959427	0.337344	0.999669	-0.89376	0.380953	-2.34612	0.0189701	1	no	no	no	0
FBgn0004611	Plc21C	Phospholipase_C_at_21C	protein_coding	2L	211	182	266	258	228	208	162	210.872	166.07	240.09	242.874	263.192	209.458	167.821	214.34	0.0265495	0.355823	0.0746144	0.940522	1	0.010097	0.356029	0.02836	0.977375	0.999669	-0.0164525	0.299049	-0.0550161	0.956126	1	no	no	no	0
FBgn0004618	gl	glass	protein_coding	3R	0	9	6	0	0	0	0	0	8.21227	5.41557	0	0	0	0	1.94684	0.104427	0.122559	0.852052	0.394185	1	0	0.122288	0	1	NA	-0.146007	0.159788	-0.913757	0.360845	NA	no	no	no	0
FBgn0004619	GluRIA	Glutamate_receptor_IA	protein_coding	3L	0	0	0	0	0	0	0	?	?	?	?	?	?	?	?	?	?	?	?	?	?	?	?	?	?	?	?	?	?	?	no	no	no	#VALUE!
FBgn0004620	GluRIIA	Glutamate_receptor_IIA	protein_coding	2L	4	23	0	20	5	3	14	3.99757	20.9869	0	18.8275	5.77176	3.02103	14.503	9.58682	0.156729	0.244221	0.641752	0.521034	1	0.0129246	0.243824	0.0530077	0.957726	NA	-0.143805	0.303585	-0.473689	0.635721	NA	no	no	no	0
FBgn0004622	TkR99D	Tachykinin-like_receptor_at_99D	protein_coding	3R	30	0	23	0	27	0	0	29.9818	0	20.7597	0	31.1675	0	0	11.7013	-0.115044	0.172045	-0.668681	0.503699	1	-0.0776461	0.171986	-0.451468	0.651652	NA	0.0373975	0.221183	0.169079	0.865734	NA	no	no	no	0
FBgn0004623	Gbeta76C	G_protein_beta-subunit_76C	protein_coding	3L	0	0	1	0	0	0	0	?	?	?	?	?	?	?	?	?	?	?	?	?	?	?	?	?	?	?	?	?	?	?	no	no	no	#VALUE!
FBgn0004629	Cys	Cystatin-like	protein_coding	3R	0	32	23	47	4	3	6	0	29.1992	20.7597	44.2446	4.61741	3.02103	6.21558	15.4368	0.81179	0.322652	2.51599	0.0118699	0.666823	-0.112267	0.320737	-0.350029	0.726317	0.999669	-0.924057	0.375558	-2.46049	0.0138746	NA	no	no	no	0
FBgn0004635	rho	rhomboid	protein_coding	3L	63	45	99	99	58	29	34	62.9617	41.0614	89.3569	93.196	66.9524	29.2033	35.2216	59.7076	0.174503	0.38892	0.448685	0.653659	1	-0.274766	0.388868	-0.70658	0.479827	0.999669	-0.449269	0.393078	-1.14295	0.253059	1	no	no	no	0
FBgn0004636	R	Roughened	protein_coding	3L	4270	4643	3831	3817	3993	4616	3820	4267.4	4236.62	3457.84	3593.22	4609.33	4648.35	3957.25	4110	-0.173376	0.189108	-0.916813	0.35924	1	0.0469406	0.189106	0.248224	0.803961	0.999669	0.220317	0.138553	1.59013	0.111806	1	no	no	no	0
FBgn0004638	drk	downstream_of_receptor_kinase	protein_coding	2R	924	916	993	677	752	818	999	923.438	835.827	896.277	637.31	868.073	823.733	1034.89	859.936	-0.200268	0.264698	-0.756592	0.449294	1	-0.0116719	0.264714	-0.0440923	0.964831	0.999669	0.188596	0.202038	0.933468	0.350578	1	no	no	no	0
FBgn0004643	Zw10	Zeste-white_10	protein_coding	X	175	180	200	170	140	121	113	174.894	164.245	180.519	160.034	161.609	121.848	117.06	154.316	-0.0115814	0.360058	-0.0321653	0.97434	1	-0.286149	0.360628	-0.793473	0.427502	0.999669	-0.274568	0.305623	-0.898387	0.368979	1	no	no	no	0
FBgn0004644	hh	hedgehog	protein_coding	3R	817	1022	990	853	577	959	735	816.503	932.549	893.569	802.992	666.061	965.722	761.408	834.115	0.092588	0.262957	0.352104	0.724761	1	-0.0335105	0.263188	-0.127325	0.898683	0.999669	-0.126099	0.200384	-0.629285	0.529163	1	no	no	no	0
FBgn0004646	ogre	optic_ganglion_reduced	protein_coding	X	3856	4941	7783	5222	3417	3946	4727	3853.65	4508.54	7024.9	4915.85	3944.42	3973.66	4896.84	4731.12	0.461065	0.23834	1.93449	0.0530534	1	0.119849	0.23842	0.502678	0.615191	0.999669	-0.341216	0.178738	-1.90903	0.0562583	1	no	no	no	0
FBgn0004647	N	Notch	protein_coding	X	229	288	255	206	131	271	282	228.861	262.793	230.162	193.923	151.22	272.899	292.132	233.141	-0.00440448	0.361044	-0.0121993	0.990267	1	0.0458923	0.361165	0.127068	0.898887	0.999669	0.0502968	0.306244	0.164238	0.869544	1	no	no	no	0
FBgn0004648	svr	silver	protein_coding	X	2986	3549	3616	4023	4421	3163	3512	2984.18	3238.37	3263.78	3787.15	5103.39	3185.17	3638.19	3600.03	0.170295	0.239537	0.710932	0.477126	1	0.37183	0.23954	1.55227	0.120598	0.909928	0.201535	0.179696	1.12154	0.262059	1	no	no	no	0
FBgn0004649	yl	yolkless	protein_coding	X	34	20	32	37	32	23	43	33.9793	18.2495	28.883	34.8308	36.9393	23.1612	44.545	31.5126	-0.130478	0.375559	-0.347424	0.728273	1	0.0462855	0.375537	0.123252	0.901908	0.999669	0.176764	0.399224	0.442768	0.657934	1	no	no	no	0
FBgn0004650	fs(1)N	female_sterile_(1)_Nasrat	protein_coding	X	1	22	19	54	10	7	9	0.999392	20.0744	17.1493	50.8342	11.5435	7.04906	9.32337	16.7105	0.672091	0.331897	2.025	0.0428675	1	0.0441066	0.33068	0.133381	0.893892	0.999669	-0.627984	0.382244	-1.64289	0.100406	NA	no	no	no	0
FBgn0004652	fru	fruitless	protein_coding	3R	1301	1298	688	1095	962	354	765	1300.21	1184.39	620.985	1030.8	1110.49	356.481	792.486	913.692	-0.287157	0.360264	-0.797075	0.425408	1	-0.555987	0.360363	-1.54285	0.122866	0.909928	-0.26883	0.305356	-0.880382	0.378652	1	no	no	no	0
FBgn0004654	Pgd	Phosphogluconate_dehydrogenase	protein_coding	X	147	92	178	144	143	126	59	146.911	83.9477	160.662	135.558	165.072	126.883	61.1199	125.736	-0.0982012	0.391171	-0.251044	0.80178	1	-0.173027	0.391271	-0.442217	0.658332	0.999669	-0.0748255	0.366109	-0.204381	0.838056	1	no	no	no	0
FBgn0004655	wapl	wings_apart-like	protein_coding	X	884	1032	802	944	699	735	691	883.462	941.674	723.881	888.657	806.892	740.152	715.827	814.364	-0.0407615	0.247979	-0.164375	0.869436	1	-0.205345	0.248283	-0.82706	0.408203	0.999669	-0.164583	0.18744	-0.878061	0.379911	1	no	no	no	0
FBgn0004656	fs(1)h	female_sterile_(1)_homeotic	protein_coding	X	4780	5335	4841	4887	3860	3793	4435	4777.09	4868.05	4369.46	4600.49	4455.8	3819.59	4594.35	4497.83	-0.0458083	0.175544	-0.26095	0.794131	1	-0.147759	0.175625	-0.841336	0.40016	0.999669	-0.101951	0.128001	-0.796487	0.425749	1	no	no	no	0
FBgn0004657	mys	myospheroid	protein_coding	X	5001	7942	6376	5140	6211	6097	6404	4997.96	7246.88	5754.95	4838.66	7169.68	6139.73	6634.09	6111.71	0.223517	0.214942	1.03989	0.29839	1	0.377574	0.21495	1.75657	0.0789919	0.829454	0.154058	0.159171	0.967873	0.333108	1	no	no	no	0
FBgn0004666	sim	single-minded	protein_coding	3R	2643	1966	1103	1913	1305	1721	1478	2641.39	1793.93	995.562	1800.85	1506.43	1733.06	1531.1	1714.62	-0.661495	0.279856	-2.3637	0.0180935	0.842597	-0.610253	0.279906	-2.1802	0.0292425	0.575598	0.0512426	0.216222	0.23699	0.812664	1	no	no	no	0
FBgn0004687	Mlc-c	Myosin_light_chain_cytoplasmic	protein_coding	X	4580	3778	4949	4388	3229	4187	3698	4577.21	3447.33	4466.94	4130.75	3727.4	4216.35	3830.87	4056.69	-0.174924	0.191682	-0.912572	0.361468	1	-0.206562	0.191744	-1.07728	0.281355	0.999669	-0.0316382	0.14068	-0.224895	0.822061	1	no	no	no	0
FBgn0004698	mus210	mutagen-sensitive_210	protein_coding	2R	630	697	797	683	324	470	412	629.617	635.995	719.368	642.958	374.01	473.294	426.803	557.435	0.0947652	0.266192	0.356003	0.721838	1	-0.508075	0.267046	-1.90258	0.0570958	0.751379	-0.602841	0.204186	-2.95241	0.00315303	0.567396	no	no	no	0
FBgn0004777	Ccp84Ag	Ccp84Ag	protein_coding	3R	0	1	0	0	0	0	0	?	?	?	?	?	?	?	?	?	?	?	?	?	?	?	?	?	?	?	?	?	?	?	no	no	no	#VALUE!
FBgn0004778	Ccp84Af	Ccp84Af	protein_coding	3R	0	0	0	0	0	0	0	?	?	?	?	?	?	?	?	?	?	?	?	?	?	?	?	?	?	?	?	?	?	?	no	no	no	#VALUE!
FBgn0004779	Ccp84Ae	Ccp84Ae	protein_coding	3R	0	0	0	0	0	0	0	?	?	?	?	?	?	?	?	?	?	?	?	?	?	?	?	?	?	?	?	?	?	?	no	no	no	#VALUE!
FBgn0004780	Ccp84Ad	Ccp84Ad	protein_coding	3R	0	0	16	0	0	0	0	0	0	14.4415	0	0	0	0	2.06307	0.104748	0.122719	0.853563	NA	NA	0	0.122462	0	NA	NA	-0.146467	0.159997	-0.915435	NA	NA	no	no	no	0
FBgn0004781	Ccp84Ac	Ccp84Ac	protein_coding	3R	0	0	0	0	0	0	0	?	?	?	?	?	?	?	?	?	?	?	?	?	?	?	?	?	?	?	?	?	?	?	no	no	no	#VALUE!
FBgn0004782	Ccp84Ab	Ccp84Ab	protein_coding	3R	0	0	0	0	0	0	0	?	?	?	?	?	?	?	?	?	?	?	?	?	?	?	?	?	?	?	?	?	?	?	no	no	no	#VALUE!
FBgn0004783	Ccp84Aa	Ccp84Aa	protein_coding	3R	0	0	0	0	0	0	0	?	?	?	?	?	?	?	?	?	?	?	?	?	?	?	?	?	?	?	?	?	?	?	no	no	no	#VALUE!
FBgn0004784	inaC	inactivation_no_afterpotential_C	protein_coding	2R	0	0	0	0	0	0	0	?	?	?	?	?	?	?	?	?	?	?	?	?	?	?	?	?	?	?	?	?	?	?	no	no	no	#VALUE!
FBgn0004795	retn	retained	protein_coding	2R	191	113	183	95	76	136	91	190.884	103.11	165.175	89.4305	87.7308	136.953	94.2696	123.936	-0.379277	0.384772	-0.985719	0.324271	1	-0.500592	0.384998	-1.30025	0.193517	0.958855	-0.121315	0.347951	-0.348654	0.727349	1	no	no	no	0
FBgn0004797	mdy	midway	protein_coding	2L	105	180	64	79	105	69	25	104.936	164.245	57.7661	74.3685	121.207	69.4836	25.8982	88.2722	0.0122356	0.386594	0.0316498	0.974751	1	-0.243048	0.386546	-0.62877	0.5295	0.999669	-0.255284	0.395501	-0.645468	0.518624	1	no	no	no	0
FBgn0004811	fs(2)ltoPP43	female_sterile_(2)_ltoPP43	protein_coding	2L	860	1355	1113	856	872	921	1215	859.477	1236.4	1004.59	805.816	1006.6	927.455	1258.65	1014.14	0.19903	0.274568	0.724886	0.468522	1	0.261398	0.274643	0.951774	0.341212	0.999669	0.0623677	0.210657	0.296064	0.767182	1	no	no	no	0
FBgn0004828	His3.3B	Histone_H3.3B	protein_coding	X	2623	2492	2322	2229	1735	2147	2276	2621.4	2273.89	2095.83	2098.32	2002.8	2162.05	2357.78	2230.3	-0.263248	0.186416	-1.41215	0.157906	1	-0.251349	0.186513	-1.34762	0.177781	0.949948	0.0118989	0.136684	0.0870546	0.930628	1	no	no	no	0
FBgn0004832	Xpac	Xeroderma_pigmentosum_group_A-like	protein_coding	X	103	219	226	118	68	162	149	102.937	199.832	203.986	111.082	78.496	163.135	154.354	144.832	0.431046	0.386453	1.11539	0.264683	1	0.150272	0.386689	0.388612	0.697563	0.999669	-0.280774	0.351248	-0.799362	0.424081	1	no	no	no	0
FBgn0004837	Su(H)	Suppressor_of_Hairless	protein_coding	2L	152	195	147	140	158	122	117	151.908	177.933	132.681	131.792	182.388	122.855	121.204	145.823	-0.0221167	0.371832	-0.0594803	0.95257	1	-0.065032	0.372066	-0.174786	0.861248	0.999669	-0.0429153	0.3229	-0.132906	0.894268	1	no	no	no	0
FBgn0004838	Hrb27C	Heterogeneous_nuclear_ribonucleoprotein_at_27C	protein_coding	2L	12675	14090	13523	11911	10775	11525	10968	12667.3	12856.8	12205.8	11212.7	12438.1	11605.8	11362.1	12049.8	-0.0637166	0.151629	-0.420213	0.67433	1	-0.0980751	0.151658	-0.646685	0.517836	0.999669	-0.0343585	0.109638	-0.31338	0.753992	1	no	no	no	0
FBgn0004839	otk	off-track	protein_coding	2R	587	651	513	574	409	665	663	586.643	594.021	463.031	540.349	472.13	669.661	686.821	573.237	-0.123363	0.291506	-0.423192	0.672155	1	0.054858	0.291533	0.188171	0.850743	0.999669	0.178221	0.227015	0.785062	0.432417	1	no	no	no	0
FBgn0004841	TkR86C	Tachykinin-like_receptor_at_86C	protein_coding	3R	0	0	0	0	0	0	0	?	?	?	?	?	?	?	?	?	?	?	?	?	?	?	?	?	?	?	?	?	?	?	no	no	no	#VALUE!
FBgn0004842	RYa-R	RYamide_receptor	protein_coding	3R	0	0	0	0	0	0	0	?	?	?	?	?	?	?	?	?	?	?	?	?	?	?	?	?	?	?	?	?	?	?	no	no	no	#VALUE!
FBgn0004852	Ac76E	Adenylyl_cyclase_76E	protein_coding	3L	327	463	159	203	381	221	324	326.801	422.476	143.513	191.099	439.808	222.549	335.641	297.412	-0.250005	0.382664	-0.653327	0.513545	1	0.050658	0.382638	0.132391	0.894675	0.999669	0.300663	0.342568	0.877674	0.380121	1	no	no	no	0
FBgn0004854	B-H2	BarH2	protein_coding	X	0	1	11	0	0	1	1	0	0.912475	9.92855	0	0	1.00701	1.03593	1.84057	0.087401	0.127846	0.683644	0.4942	1	-0.0186642	0.127564	-0.146313	0.883675	NA	-0.106065	0.166485	-0.637085	0.52407	NA	no	no	no	0
FBgn0004855	RpII15	RNA_polymerase_II_15kD_subunit	protein_coding	3R	2031	1839	2051	1912	1302	1606	2046	2029.76	1678.04	1851.22	1799.91	1502.97	1617.26	2119.51	1799.81	-0.171629	0.228221	-0.752031	0.452032	1	-0.194702	0.228322	-0.852751	0.393798	0.999669	-0.0230727	0.170454	-0.13536	0.892327	1	no	no	no	0
FBgn0004856	Bx42	Bx42	protein_coding	X	312	266	292	289	205	283	270	311.81	242.718	263.558	272.057	236.642	284.984	279.701	270.21	-0.208523	0.314927	-0.662133	0.507886	1	-0.17071	0.315156	-0.541669	0.588046	0.999669	0.0378131	0.251293	0.150474	0.880391	1	no	no	no	0
FBgn0004858	elB	elbow_B	protein_coding	2L	385	240	519	322	220	218	207	384.766	218.994	468.447	303.122	253.957	219.528	214.437	294.75	-0.115243	0.354008	-0.325537	0.744775	1	-0.552554	0.354473	-1.5588	0.119043	0.909928	-0.437311	0.297375	-1.47057	0.141407	1	no	no	no	0
FBgn0004859	ci	cubitus_interruptus	protein_coding	4	8077	8869	8587	8450	5131	6245	6016	8072.09	8092.74	7750.58	7954.61	5922.98	6288.77	6232.15	7187.7	-0.0202212	0.142478	-0.141925	0.887139	1	-0.381643	0.142601	-2.6763	0.00744399	0.273805	-0.361422	0.102857	-3.51384	0.000441672	0.151734	no	no	no	0
FBgn0004860	ph-d	polyhomeotic_distal	protein_coding	X	1706	1408	1564	1329	1096	1144	836	1704.96	1284.76	1411.66	1251.09	1265.17	1152.02	866.037	1276.53	-0.320199	0.244426	-1.31001	0.190194	1	-0.571071	0.244681	-2.33394	0.0195989	0.476713	-0.250872	0.184607	-1.35895	0.174162	1	no	no	no	0
FBgn0004861	ph-p	polyhomeotic_proximal	protein_coding	X	1415	1259	1553	1504	912	1310	910	1414.14	1148.81	1401.73	1415.83	1052.77	1319.18	942.696	1242.16	-0.0763504	0.24727	-0.308773	0.757494	1	-0.320008	0.247515	-1.29288	0.196052	0.961975	-0.243658	0.186816	-1.30426	0.192143	1	no	no	no	0
FBgn0004862	bap	bagpipe	protein_coding	3R	0	0	0	0	0	0	0	?	?	?	?	?	?	?	?	?	?	?	?	?	?	?	?	?	?	?	?	?	?	?	no	no	no	#VALUE!
FBgn0004863	C15	C15	protein_coding	3R	0	0	7	0	0	11	0	0	0	6.31817	0	0	11.0771	0	2.48504	0.0123799	0.123223	0.100468	0.919973	1	0.051284	0.123122	0.416529	0.677023	NA	0.0389041	0.160735	0.242038	0.808751	NA	no	no	no	0
FBgn0004864	hop	hopscotch	protein_coding	X	1899	1993	2089	1700	1699	1567	2134	1897.84	1818.56	1885.52	1600.34	1961.24	1577.98	2210.67	1850.31	-0.0947653	0.227468	-0.416609	0.676964	1	0.0159406	0.22751	0.0700655	0.944141	0.999669	0.110706	0.169669	0.652482	0.51409	1	no	no	no	0
FBgn0004865	Eip78C	Ecdysone-induced_protein_78C	protein_coding	3L	1413	987	932	1370	668	375	1111	1412.14	900.613	841.219	1289.68	771.107	377.628	1150.92	963.33	-0.312199	0.351266	-0.888781	0.374121	1	-0.645516	0.351394	-1.83701	0.0662079	0.793046	-0.333317	0.293234	-1.13669	0.255666	1	no	no	no	0
FBgn0004867	RpS2	Ribosomal_protein_S2	protein_coding	2L	40157	46094	46514	40845	32595	48171	53569	40132.6	42059.6	41983.3	38450.4	37626.1	48508.6	55493.7	43464.9	0.0185585	0.197499	0.0939674	0.925135	1	0.220819	0.197499	1.11808	0.263535	0.999669	0.202261	0.145176	1.39321	0.163555	1	no	no	no	0
FBgn0004868	Gdi	GDP_dissociation_inhibitor	protein_coding	2L	885	1416	1192	1124	1155	1518	1141	884.462	1292.06	1075.89	1058.1	1333.28	1528.64	1182	1193.49	0.318423	0.237165	1.34263	0.179393	1	0.545319	0.237157	2.2994	0.0214825	0.493271	0.226895	0.177141	1.28087	0.200238	1	no	no	no	0
FBgn0004870	bab1	bric_a_brac_1	protein_coding	3L	1167	1416	1411	1131	1111	1315	1004	1166.29	1292.06	1273.56	1064.69	1282.49	1324.22	1040.07	1206.2	0.0471086	0.235021	0.200445	0.841133	1	0.0531756	0.235143	0.226142	0.821091	0.999669	0.00606699	0.175954	0.0344806	0.972494	1	no	no	no	0
FBgn0004872	piwi	piwi	protein_coding	2L	4819	5980	5197	6027	4647	5646	5061	4816.07	5456.6	4690.79	5673.66	5364.27	5685.57	5242.84	5275.69	0.122841	0.171425	0.716585	0.47363	1	0.164205	0.171463	0.957669	0.338229	0.999669	0.0413641	0.12467	0.33179	0.740048	1	no	no	no	0
FBgn0004875	enc	encore	protein_coding	3L	3133	4086	3952	4128	2973	3222	3795	3131.09	3728.37	3567.06	3885.99	3431.89	3244.58	3931.35	3560.05	0.237085	0.178986	1.3246	0.185303	1	0.163214	0.179073	0.911433	0.362067	0.999669	-0.0738714	0.130482	-0.566144	0.571296	1	no	no	no	0
FBgn0004876	cdi	center_divider	protein_coding	3R	690	555	674	503	399	722	253	689.58	506.424	608.349	473.511	460.587	727.061	262.09	532.514	-0.255017	0.353384	-0.721644	0.470513	1	-0.364546	0.353511	-1.03122	0.302439	0.999669	-0.109529	0.296039	-0.369982	0.711396	1	no	no	no	0
FBgn0004878	cas	castor	protein_coding	3R	256	189	53	66	64	55	147	255.844	172.458	47.8375	62.1307	73.8785	55.3855	152.282	117.117	-0.649213	0.391243	-1.65936	0.0970431	1	-0.651341	0.391247	-1.66478	0.0959566	0.863695	-0.00212827	0.389337	-0.00546639	0.995638	1	no	no	no	0
FBgn0004880	scrt	scratch	protein_coding	3L	26	25	38	22	7	1	5	25.9842	22.8119	34.2986	20.7102	8.08047	1.00701	5.17965	16.8674	0.151762	0.324826	0.467209	0.64035	1	-0.544557	0.323494	-1.68336	0.0923051	0.85599	-0.696319	0.376066	-1.85159	0.0640849	NA	no	no	no	0
FBgn0004882	orb	oo18_RNA-binding_protein	protein_coding	3R	780	920	1138	1081	634	785	957	779.526	839.477	1027.15	1017.62	731.859	790.502	991.385	882.504	0.26798	0.257776	1.03958	0.298533	1	0.0825028	0.258041	0.319727	0.749175	0.999669	-0.185477	0.195543	-0.94852	0.342865	1	no	no	no	0
FBgn0004885	tok	tolkin	protein_coding	3R	387	244	486	443	195	454	149	386.765	222.644	438.661	417.029	225.099	457.182	154.354	328.819	-0.0301187	0.380912	-0.07907	0.936977	1	-0.308423	0.381059	-0.809382	0.418295	0.999669	-0.278304	0.339196	-0.82048	0.411942	1	no	no	no	0
FBgn0004888	Scsalpha	Succinyl_coenzyme_A_synthetase_alpha_subunit	protein_coding	3L	225	375	287	433	375	330	286	224.863	342.178	259.045	407.615	432.882	332.313	296.276	327.882	0.415954	0.334237	1.24449	0.21332	1	0.479288	0.334358	1.43346	0.151727	0.934262	0.0633339	0.271101	0.233617	0.815282	1	no	no	no	0
FBgn0004889	tws	twins	protein_coding	3R	9492	9300	9734	8687	5400	7173	8929	9486.23	8486.02	8785.86	8177.71	6233.5	7223.28	9249.82	8234.63	-0.144054	0.20596	-0.699425	0.484286	1	-0.302307	0.206002	-1.4675	0.142241	0.924298	-0.158253	0.152038	-1.04088	0.29793	1	no	no	no	0
FBgn0004892	sob	sister_of_odd_and_bowl	protein_coding	2L	355	590	512	426	336	539	655	354.784	538.36	462.129	401.025	387.862	542.778	678.534	480.782	0.289876	0.318835	0.909171	0.36326	1	0.467007	0.31886	1.46462	0.143026	0.924298	0.177131	0.254164	0.696917	0.485855	1	no	no	no	0
FBgn0004893	bowl	brother_of_odd_with_entrails_limited	protein_coding	2L	3554	3462	3441	3587	2150	3095	2169	3551.84	3158.99	3105.83	3376.71	2481.86	3116.69	2246.93	3005.55	-0.124964	0.208808	-0.598464	0.549531	1	-0.410604	0.208959	-1.965	0.0494146	0.710197	-0.28564	0.154503	-1.84877	0.0644912	1	no	no	no	0
FBgn0004895	fd64A	forkhead_domain_64A	protein_coding	3L	0	0	0	57	0	0	0	0	0	0	53.6583	0	0	0	7.66547	0.135924	0.138402	0.982093	NA	NA	0	0.138289	0	NA	NA	-0.190201	0.179818	-1.05774	NA	NA	no	no	no	0
FBgn0004896	fd59A	forkhead_domain_59A	protein_coding	2R	0	0	13	0	0	0	0	0	0	11.7337	0	0	0	0	1.67625	0.103525	0.122109	0.847808	0.396545	1	0	0.121799	0	1	NA	-0.144719	0.159199	-0.909044	0.363327	NA	no	no	no	0
FBgn0004897	fd96Ca	forkhead_domain_96Ca	protein_coding	3R	12	14	181	11	0	36	0	11.9927	12.7746	163.37	10.3551	0	36.2523	0	33.5349	0.310246	0.251779	1.23222	NA	NA	-0.116091	0.251539	-0.461525	NA	NA	-0.426337	0.311475	-1.36877	NA	NA	no	no	no	0
FBgn0004898	fd96Cb	forkhead_domain_96Cb	protein_coding	3R	3	49	195	9	6	39	0	2.99818	44.7113	176.006	8.47236	6.92611	39.2734	0	39.7696	0.527514	0.290175	1.81791	0.0690773	1	-0.0793947	0.289782	-0.273981	0.7841	0.999669	-0.606909	0.3489	-1.73949	0.0819488	1	no	no	no	0
FBgn0004901	Prat	Phosphoribosylamidotransferase	protein_coding	3R	1135	1325	1163	1120	838	1012	953	1134.31	1209.03	1049.72	1054.34	967.347	1019.09	987.241	1060.15	-0.0310649	0.215998	-0.14382	0.885642	1	-0.180329	0.216285	-0.833753	0.40442	0.999669	-0.149264	0.160426	-0.93042	0.352154	1	no	no	no	0
FBgn0004903	Rb97D	Ribonuclear_protein_at_97D	protein_coding	3R	608	572	697	552	498	664	481	607.63	521.936	629.109	519.638	574.867	668.654	498.282	574.302	-0.107854	0.276741	-0.389729	0.696737	1	-0.0523061	0.276881	-0.188912	0.850162	0.999669	0.0555481	0.213131	0.260629	0.794378	1	no	no	no	0
FBgn0004907	14-3-3zeta	14-3-3zeta	protein_coding	2R	5008	4665	5374	4426	3614	4191	3914	5004.95	4256.7	4850.55	4166.52	4171.83	4220.38	4054.63	4389.36	-0.16709	0.165813	-1.0077	0.313598	1	-0.257739	0.1659	-1.55358	0.120284	0.909928	-0.0906495	0.120566	-0.751865	0.452132	1	no	no	no	0
FBgn0004908	Arl2	ADP_ribosylation_factor-like_2	protein_coding	3R	16	14	1	13	23	16	15	15.9903	12.7746	0.902595	12.2379	26.5501	16.1121	15.5389	14.3009	-0.196479	0.302846	-0.648774	0.516485	1	0.122644	0.302988	0.404781	0.685639	NA	0.319122	0.359967	0.886533	0.37533	NA	no	no	no	0
FBgn0004910	Eip63F-1	Ecdysone-induced_protein_63F_1	protein_coding	3L	3	26	0	25	10	19	24	2.99818	23.7243	0	23.5343	11.5435	19.1332	24.8623	15.1137	0.134589	0.274202	0.490839	0.62354	1	0.192591	0.274054	0.702751	0.482211	NA	0.0580021	0.334248	0.17353	0.862235	NA	no	no	no	0
FBgn0004911	Eip63F-2	Ecdysone-induced_protein_63F_2	lincRNA	3L	0	0	0	0	0	0	0	?	?	?	?	?	?	?	?	?	?	?	?	?	?	?	?	?	?	?	?	?	?	?	no	no	no	#VALUE!
FBgn0004913	Gnf1	Germ_line_transcription_factor_1	protein_coding	3R	548	744	631	682	511	543	372	547.667	678.881	569.537	642.017	589.874	546.806	385.366	565.735	0.180061	0.291713	0.617256	0.537066	1	-0.105163	0.292102	-0.36002	0.718832	0.999669	-0.285224	0.227303	-1.25482	0.209545	1	no	no	no	0
FBgn0004914	Hnf4	Hepatocyte_nuclear_factor_4	protein_coding	2L	530	630	502	391	437	377	526	529.678	574.859	453.103	368.077	504.452	379.642	544.899	479.244	-0.147465	0.312979	-0.471165	0.637523	1	-0.117764	0.313117	-0.376103	0.706841	0.999669	0.0297009	0.248892	0.119332	0.905012	1	no	no	no	0
FBgn0004915	TfIIB	Transcription_factor_IIB	protein_coding	2L	150	232	140	143	183	225	155	149.909	211.694	126.363	134.616	211.246	226.577	160.569	174.425	0.0158365	0.368773	0.0429436	0.965746	1	0.289545	0.368724	0.785263	0.432299	0.999669	0.273709	0.317364	0.862446	0.388442	1	no	no	no	0
FBgn0004919	gol	goliath	protein_coding	2R	79	72	42	74	161	69	118	78.9519	65.6982	37.909	69.6617	185.851	69.4836	122.24	89.9707	-0.313567	0.392862	-0.798162	0.424777	1	0.424926	0.392741	1.08195	0.279274	0.999669	0.738494	0.378852	1.94929	0.0512606	1	no	no	no	0
FBgn0004921	Ggamma1	G_protein_gamma_1	protein_coding	2R	4555	4654	4452	3981	3616	4381	4321	4552.23	4246.66	4018.35	3747.61	4174.14	4411.71	4476.25	4232.42	-0.177444	0.162073	-1.09484	0.273587	1	-0.0592574	0.162102	-0.365556	0.714697	0.999669	0.118187	0.117627	1.00476	0.315014	1	no	no	no	0
FBgn0004924	Top1	Topoisomerase_1	protein_coding	X	5060	6484	6114	5503	4828	5637	5629	5056.92	5916.49	5518.47	5180.38	5573.21	5676.51	5831.25	5536.18	0.124594	0.156281	0.797242	0.42531	1	0.163655	0.156322	1.04691	0.295141	0.999669	0.0390614	0.113068	0.345469	0.729742	1	no	no	no	0
FBgn0004926	eIF-2beta	Eukaryotic_initiation_factor_2beta	protein_coding	3L	1279	1219	1179	1479	1402	1009	1166	1278.22	1112.31	1064.16	1392.29	1618.4	1016.07	1207.89	1241.34	-0.0920462	0.270804	-0.3399	0.733932	1	0.00646379	0.270854	0.0238645	0.980961	0.999669	0.09851	0.207503	0.474741	0.634972	1	no	no	no	0
FBgn0004956	os	outstretched	protein_coding	X	5	163	13	2	11	24	25	4.99696	148.733	11.7337	1.88275	12.6979	24.1682	25.8982	32.873	0.437057	0.302373	1.44542	0.148339	1	0.0235829	0.302002	0.0780887	0.937758	0.999669	-0.413474	0.359621	-1.14975	0.250247	1	no	no	no	0
FBgn0004957	por	porcupine	protein_coding	X	39	55	23	64	25	35	0	38.9763	50.1861	20.7597	60.2479	28.8588	35.2453	0	33.4677	0.101474	0.312363	0.32486	0.745287	1	-0.202597	0.312046	-0.649254	0.516174	0.999669	-0.304071	0.367532	-0.827332	0.408049	1	no	no	no	0
FBgn0004959	phm	phantom	protein_coding	X	0	0	0	0	0	6	0	0	0	0	0	0	6.04205	0	0.863151	0	0.118942	0	1	NA	0.0986948	0.118825	0.830589	0.406206	NA	0.138388	0.155367	0.89072	0.37308	NA	no	no	no	0
FBgn0005198	gig	gigas	protein_coding	3L	609	679	923	597	363	565	465	608.63	619.571	833.095	562	419.03	568.96	481.707	584.713	0.137555	0.295394	0.465667	0.641454	1	-0.275051	0.295858	-0.929673	0.352541	0.999669	-0.412606	0.231143	-1.78507	0.0742501	1	no	no	no	0
FBgn0005278	Sam-S	S-adenosylmethionine_Synthetase	protein_coding	2L	3009	3095	3193	2531	3333	2870	2481	3007.17	2824.11	2881.99	2382.62	3847.46	2890.12	2570.14	2914.8	-0.146202	0.232795	-0.62803	0.529984	1	0.0459571	0.232801	0.197409	0.843507	0.999669	0.19216	0.174123	1.10358	0.269773	1	no	no	no	0
FBgn0005322	nmd	no_mitochondrial_derivative	protein_coding	2L	148	24	110	96	86	37	48	147.91	21.8994	99.2855	90.3719	99.2743	37.2593	49.7246	77.9607	-0.403019	0.385008	-1.04678	0.295201	1	-0.50124	0.384959	-1.30206	0.192896	0.958855	-0.0982213	0.396802	-0.247532	0.804496	1	no	no	no	0
FBgn0005355	Su(fu)	Suppressor_of_fused	protein_coding	3R	197	177	128	202	107	116	153	196.88	161.508	115.532	190.157	123.516	116.813	158.497	151.843	-0.198286	0.37045	-0.535258	0.592472	1	-0.378928	0.370821	-1.02186	0.306845	0.999669	-0.180642	0.321256	-0.562299	0.573912	1	no	no	no	0
FBgn0005386	ash1	absent,_small,_or_homeotic_discs_1	protein_coding	3L	1460	1285	1246	1152	1156	945	1178	1459.11	1172.53	1124.63	1084.46	1334.43	951.624	1220.33	1192.45	-0.331394	0.238174	-1.3914	0.164106	1	-0.282244	0.238273	-1.18454	0.2362	0.987478	0.0491498	0.17906	0.274488	0.78371	1	no	no	no	0
FBgn0005390	fs(1)M3	female_sterile_(1)_M3	protein_coding	X	94	105	205	158	89	137	87	93.9428	95.8099	185.032	148.737	102.737	137.96	90.1259	122.049	0.370987	0.384679	0.964407	0.334842	1	0.0881261	0.384995	0.228902	0.818945	0.999669	-0.282861	0.347034	-0.815081	0.415026	1	no	no	no	0
FBgn0005391	Yp2	Yolk_protein_2	protein_coding	X	23	119	97	39	161	130	90	22.986	108.585	87.5517	36.7136	185.851	130.911	93.2337	95.1188	0.493801	0.392366	1.25852	0.208203	1	1.0418	0.39231	2.65554	0.00791805	0.2854	0.547995	0.380396	1.44059	0.1497	1	no	no	no	0
FBgn0005411	U2af50	U2_small_nuclear_riboprotein_auxiliary_factor_50	protein_coding	X	460	337	593	486	294	294	398	459.72	307.504	535.239	457.508	339.38	296.061	412.3	401.102	-0.0444476	0.328787	-0.135187	0.892464	1	-0.315957	0.32915	-0.959917	0.337097	0.999669	-0.271509	0.266309	-1.01953	0.307953	1	no	no	no	0
FBgn0005427	ewg	erect_wing	protein_coding	X	1045	1207	1342	1005	804	1210	824	1044.36	1101.36	1211.28	946.081	928.099	1218.48	853.606	1043.32	0.0532782	0.260063	0.204867	0.837676	1	-0.0579982	0.260245	-0.22286	0.823644	0.999669	-0.111276	0.197818	-0.562518	0.573763	1	no	no	no	0
FBgn0005533	RpS17	Ribosomal_protein_S17	protein_coding	3L	20314	27854	26485	26058	24682	23263	36623	20301.6	25416.1	23905.2	24530.3	28491.7	23426.1	37938.9	26287.1	0.244389	0.216997	1.12624	0.260066	1	0.515426	0.216995	2.37529	0.0175353	0.454587	0.271036	0.160924	1.68425	0.0921336	1	no	no	no	0
FBgn0005536	Mbs	Myosin_binding_subunit	protein_coding	3L	2369	1930	2001	1397	1603	1774	1272	2367.56	1761.08	1806.09	1315.1	1850.43	1786.43	1317.7	1743.48	-0.472095	0.251378	-1.87803	0.0603769	1	-0.452326	0.251451	-1.79886	0.0720407	0.803316	0.0197691	0.190423	0.103817	0.917315	1	no	no	no	0
FBgn0005558	ey	eyeless	protein_coding	4	108	189	169	208	176	137	249	107.934	172.458	152.539	195.806	203.166	137.96	257.946	175.401	0.403961	0.368516	1.09618	0.272999	1	0.567286	0.368557	1.53921	0.123753	0.909928	0.163325	0.316262	0.516423	0.605559	1	no	no	no	0
FBgn0005561	sv	shaven	protein_coding	4	17	22	17	21	10	12	27	16.9897	20.0744	15.3441	19.7688	11.5435	12.0841	27.9701	17.6821	0.0324198	0.342348	0.0946984	0.924554	1	-0.00445684	0.342025	-0.0130307	0.989603	0.999822	-0.0368766	0.388245	-0.0949829	0.924328	NA	no	no	no	0
FBgn0005564	Shal	Shaker_cognate_l	protein_coding	3L	71	6	28	24	0	6	31	70.9568	5.47485	25.2727	22.593	0	6.04205	32.1138	23.2076	-0.346308	0.288603	-1.19995	0.23016	1	-0.440421	0.288358	-1.52734	0.126677	0.909928	-0.0941127	0.346946	-0.27126	0.786191	1	no	no	no	0
FBgn0005585	Crc	Calreticulin	protein_coding	3R	5451	4656	5580	4846	4361	4548	4180	5447.68	4248.48	5036.48	4561.9	5034.13	4579.88	4330.19	4748.39	-0.225093	0.175657	-1.28144	0.200039	1	-0.215343	0.175707	-1.22559	0.220355	0.97728	0.00975004	0.128131	0.0760945	0.939344	1	no	no	no	0
FBgn0005586	Rab3	Rab3	protein_coding	2R	19	76	30	46	37	49	51	18.9884	69.3481	27.0779	43.3032	42.711	49.3434	52.8324	43.3721	0.382522	0.385173	0.993119	0.320652	1	0.41273	0.38513	1.07167	0.283871	0.999669	0.0302081	0.395972	0.0762885	0.93919	1	no	no	no	0
FBgn0005590	scw	screw	protein_coding	2L	0	0	0	0	0	0	0	?	?	?	?	?	?	?	?	?	?	?	?	?	?	?	?	?	?	?	?	?	?	?	no	no	no	#VALUE!
FBgn0005592	btl	breathless	protein_coding	3L	12	51	8	17	13	13	12	11.9927	46.5362	7.22076	16.0034	15.0066	13.0911	12.4312	17.4688	0.230398	0.325773	0.707234	0.479421	1	-0.0402506	0.325172	-0.123782	0.901488	0.999669	-0.270648	0.377694	-0.716581	0.473633	NA	no	no	no	0
FBgn0005593	RpL7	Ribosomal_protein_L7	protein_coding	2L	13880	14201	17260	14709	11875	15431	17098	13871.6	12958.1	15578.8	13846.7	13707.9	15539.2	17712.3	14744.9	0.022047	0.182583	0.120751	0.903889	1	0.165739	0.182588	0.907722	0.364025	0.999669	0.143692	0.133387	1.07725	0.281367	1	no	no	no	0
FBgn0005596	yem	yemanuclein	protein_coding	3R	700	533	540	633	551	402	549	699.574	486.349	487.401	595.89	636.048	404.818	568.725	554.115	-0.340469	0.297721	-1.14358	0.252797	1	-0.308018	0.297862	-1.03409	0.301092	0.999669	0.0324517	0.233632	0.138901	0.889529	1	no	no	no	0
FBgn0005612	Sox14	Sox_box_protein_14	protein_coding	2R	1791	1381	1503	1819	1580	1714	1074	1789.91	1260.13	1356.6	1712.36	1823.88	1726.01	1112.59	1540.21	-0.266193	0.273967	-0.971623	0.331238	1	-0.16731	0.274007	-0.610605	0.541461	0.999669	0.0988828	0.210527	0.469693	0.638575	1	no	no	no	0
FBgn0005613	Sox15	Sox_box_protein_15	protein_coding	2R	0	3	95	8	5	0	0	0	2.73742	85.7465	7.53099	5.77176	0	0	14.541	0.37208	0.226169	1.64514	NA	NA	-0.121039	0.225689	-0.536308	NA	NA	-0.493119	0.283926	-1.73679	NA	NA	no	no	no	0
FBgn0005614	trpl	transient_receptor_potential-like	protein_coding	2R	0	0	0	0	0	1	0	?	?	?	?	?	?	?	?	?	?	?	?	?	?	?	?	?	?	?	?	?	?	?	no	no	no	#VALUE!
FBgn0005616	msl-2	male-specific_lethal_2	protein_coding	2L	482	489	571	426	490	328	477	481.707	446.2	515.382	401.025	565.633	330.299	494.138	462.055	-0.067004	0.316866	-0.211458	0.83253	1	-0.0420814	0.317005	-0.132747	0.894394	0.999669	0.0249227	0.252879	0.0985555	0.921491	1	no	no	no	0
FBgn0005617	msl-1	male-specific_lethal_1	protein_coding	2L	1007	961	1107	893	782	723	764	1006.39	876.888	999.173	840.647	902.703	728.068	791.45	877.902	-0.129039	0.241231	-0.534918	0.592707	1	-0.285838	0.241525	-1.18347	0.236622	0.987478	-0.156799	0.181738	-0.862778	0.38826	1	no	no	no	0
FBgn0005619	Hdc	Histidine_decarboxylase	protein_coding	2R	0	11	29	0	17	8	0	0	10.0372	26.1753	0	19.624	8.05607	0	9.12751	0.119158	0.200263	0.595005	0.55184	1	0.0678627	0.200089	0.339163	0.734487	NA	-0.0512951	0.254719	-0.201379	0.840402	NA	no	no	no	0
FBgn0005624	Psc	Posterior_sex_combs	protein_coding	2R	1665	1768	1954	1832	1459	1637	1548	1663.99	1613.26	1763.67	1724.6	1684.2	1648.47	1603.62	1671.69	0.0301001	0.186245	0.161615	0.871609	1	-0.0160265	0.186408	-0.0859757	0.931486	0.999669	-0.0461267	0.136317	-0.338378	0.735078	1	no	no	no	0
FBgn0005626	ple	pale	protein_coding	3L	572	734	1144	707	192	633	710	571.652	669.757	1032.57	665.551	221.636	637.437	735.51	647.73	0.345065	0.367841	0.938083	0.348202	1	-0.114254	0.367996	-0.310477	0.756198	0.999669	-0.45932	0.316355	-1.45191	0.146527	1	no	no	no	0
FBgn0005630	lola	longitudinals_lacking	protein_coding	2R	5569	6089	5950	5659	4475	5042	5348	5565.61	5556.06	5370.44	5327.23	5165.73	5077.34	5540.15	5371.8	-0.0366128	0.150732	-0.242901	0.808082	1	-0.0781788	0.150798	-0.518434	0.604156	0.999669	-0.041566	0.108983	-0.381399	0.702908	1	no	no	no	0
FBgn0005631	robo	roundabout	protein_coding	2R	1836	1543	1643	1415	1235	1278	1225	1834.88	1407.95	1482.96	1332.04	1425.63	1286.96	1269.01	1434.21	-0.35073	0.200169	-1.75217	0.0797449	1	-0.432803	0.200371	-2.16	0.0307724	0.58617	-0.0820728	0.147901	-0.554917	0.578951	1	no	no	no	0
FBgn0005632	faf	fat_facets	protein_coding	3R	1785	1413	1960	1628	1195	1300	1163	1783.91	1289.33	1769.09	1532.56	1379.45	1309.11	1204.79	1466.89	-0.19144	0.228584	-0.837504	0.402309	1	-0.417814	0.228818	-1.82596	0.0678556	0.795498	-0.226374	0.170986	-1.32393	0.185525	1	no	no	no	0
FBgn0005633	fln	flightin	protein_coding	3L	0	0	0	9	0	0	0	0	0	0	8.47236	0	0	0	1.21034	0.101092	0.120878	0.836315	0.402978	1	0	0.120468	0	1	NA	-0.141247	0.157591	-0.896292	0.370097	NA	no	no	no	0
FBgn0005636	nvy	nervy	protein_coding	2R	0	0	0	7	0	0	0	0	0	0	6.58962	0	0	0	0.941374	0.0987381	0.119664	0.825126	0.4093	NA	0	0.119159	0	1	NA	-0.137892	0.156005	-0.883894	0.376753	NA	no	no	no	0
FBgn0005638	slbo	slow_border_cells	protein_coding	2R	52	7	35	60	19	21	6	51.9684	6.38732	31.5908	56.4824	21.9327	21.1472	6.21558	27.9606	-0.115692	0.338068	-0.342216	0.732188	1	-0.432881	0.337608	-1.2822	0.199773	0.964429	-0.317188	0.385342	-0.823134	0.410432	1	no	no	no	0
FBgn0005640	Eip63E	Ecdysone-induced_protein_63E	protein_coding	3L	2466	1851	2176	1861	1133	2115	1556	2464.5	1688.99	1964.05	1751.9	1307.88	2129.82	1611.91	1845.58	-0.390455	0.2517	-1.55127	0.120837	1	-0.48224	0.251809	-1.9151	0.0554796	0.745795	-0.0917851	0.19069	-0.481332	0.630281	1	no	no	no	0
FBgn0005642	wdn	wings_down	protein_coding	3R	606	618	615	493	481	434	567	605.631	563.91	555.096	464.097	555.243	437.042	587.372	538.342	-0.165021	0.281348	-0.586538	0.557514	1	-0.168196	0.281547	-0.597399	0.550241	0.999669	-0.00317423	0.217647	-0.0145843	0.988364	1	no	no	no	0
FBgn0005648	Pabp2	Pabp2	protein_coding	2R	11132	12422	11995	9525	8592	10336	11133	11125.2	11334.8	10826.6	8966.58	9918.19	10408.4	11533	10587.6	-0.0949318	0.178905	-0.530628	0.595677	1	-0.0623251	0.178924	-0.348333	0.72759	0.999669	0.0326067	0.130555	0.249755	0.802777	1	no	no	no	0
FBgn0005649	Rox8	Rox8	protein_coding	3R	5460	5716	5405	5536	4308	4505	4507	5456.68	5215.71	4878.53	5211.44	4972.95	4536.58	4668.94	4991.55	-0.0911758	0.154784	-0.589053	0.555825	1	-0.199382	0.154872	-1.2874	0.197954	0.964429	-0.108206	0.112112	-0.965165	0.334462	1	no	no	no	0
FBgn0005654	lat	latheo	protein_coding	2R	0	0	0	0	0	0	0	?	?	?	?	?	?	?	?	?	?	?	?	?	?	?	?	?	?	?	?	?	?	?	no	no	no	#VALUE!
FBgn0005655	PCNA	Proliferating_cell_nuclear_antigen	protein_coding	2R	1654	1872	1828	1759	1367	1808	1530	1652.99	1708.15	1649.94	1655.88	1578	1820.67	1584.97	1664.37	0.0149132	0.194402	0.0767135	0.938851	1	0.00660079	0.194532	0.0339316	0.972932	0.999669	-0.00831244	0.142742	-0.058234	0.953562	1	no	no	no	0
FBgn0005658	Ets65A	Ets_at_65A	protein_coding	3L	1	0	4	0	1	0	0	0.999392	0	3.61038	0	1.15435	0	0	0.823446	0.0222514	0.119108	0.186817	0.851804	NA	-0.0349805	0.118683	-0.294738	0.768194	NA	-0.0572319	0.15527	-0.368596	0.712429	NA	no	no	no	0
FBgn0005659	Ets98B	Ets_at_98B	protein_coding	3R	24	96	123	193	121	84	264	23.9854	87.5976	111.019	181.685	139.677	84.5888	273.485	128.863	0.793785	0.392398	2.02291	0.0430829	1	1.0628	0.392388	2.70854	0.00675799	0.263517	0.269014	0.375361	0.716681	0.473571	1	no	no	no	0
FBgn0005660	Ets21C	Ets_at_21C	protein_coding	2L	79	97	61	78	95	106	117	78.9519	88.5101	55.0583	73.4271	109.663	106.743	121.204	90.5082	-0.130268	0.386706	-0.336866	0.736218	1	0.340966	0.386506	0.882174	0.377682	0.999669	0.471234	0.351442	1.34086	0.179967	1	no	no	no	0
FBgn0005664	Cry	Crystallin	protein_coding	2L	0	0	0	0	0	0	0	?	?	?	?	?	?	?	?	?	?	?	?	?	?	?	?	?	?	?	?	?	?	?	no	no	no	#VALUE!
FBgn0005666	bt	bent	protein_coding	4	235	219	172	122	246	335	141	234.857	199.832	155.246	114.848	283.971	337.348	146.066	210.31	-0.411153	0.377836	-1.08818	0.276517	1	0.136155	0.377656	0.360527	0.718453	0.999669	0.547308	0.333033	1.64341	0.100299	1	no	no	no	0
FBgn0005670	Cyp4d1	Cytochrome_P450-4d1	protein_coding	X	23	57	49	76	316	86	131	22.986	52.0111	44.2272	71.5444	364.775	86.6028	135.707	111.122	0.140056	0.391492	0.35775	0.72053	1	1.30426	0.391432	3.33203	0.000862155	0.0662494	1.16421	0.386377	3.01313	0.00258564	0.54214	no	yes	no	1
FBgn0005671	Vha55	Vacuolar_H[+]-ATPase_55kD_subunit	protein_coding	3R	10093	10979	10996	11018	9913	9848	9360	10086.9	10018.1	9924.94	10372.1	11443.1	9917.03	9696.3	10208.3	0.00200961	0.15708	0.0127935	0.989793	1	0.0360849	0.157103	0.229689	0.818333	0.999669	0.0340753	0.113744	0.299579	0.764498	1	no	no	no	0
FBgn0005672	spi	spitz	protein_coding	2L	4147	4015	3669	3573	2425	2868	2774	4144.48	3663.59	3311.62	3363.53	2799.3	2888.1	2873.67	3292.04	-0.248814	0.163288	-1.52377	0.127565	1	-0.514763	0.16348	-3.14879	0.0016395	0.101793	-0.265949	0.118848	-2.23772	0.0252392	1	no	no	no	0
FBgn0005674	Aats-glupro	Glutamyl-prolyl-tRNA_synthetase	protein_coding	3R	1097	1323	1280	1019	1094	1033	1038	1096.33	1207.2	1155.32	959.26	1262.86	1040.24	1075.3	1113.79	0.0120284	0.235752	0.0510216	0.959308	1	0.0348102	0.235873	0.14758	0.882674	0.999669	0.0227817	0.176605	0.128999	0.897359	1	no	no	no	0
FBgn0005677	dac	dachshund	protein_coding	2L	13	14	452	8	16	0	28	12.9921	12.7746	407.973	7.53099	18.4696	0	29.006	69.8209	0.56631	0.289892	1.95352	NA	NA	-0.195987	0.289607	-0.676735	NA	NA	-0.762297	0.3486	-2.18674	NA	NA	no	no	no	0
FBgn0005683	pie	pineapple_eye	protein_coding	2L	133	234	255	196	156	112	186	132.919	213.519	230.162	184.509	180.079	112.785	192.683	178.094	0.453895	0.364071	1.24672	0.212499	1	0.149381	0.364534	0.409785	0.681964	0.999669	-0.304514	0.310261	-0.981478	0.326357	1	no	no	no	0
FBgn0005694	Aef1	Adult_enhancer_factor_1	protein_coding	3L	2848	3335	3601	3291	2218	2804	3210	2846.27	3043.1	3250.24	3098.06	2560.35	2823.65	3325.33	2992.43	0.129416	0.194077	0.666827	0.504882	1	0.0243394	0.194182	0.125344	0.900251	0.999669	-0.105077	0.142441	-0.737688	0.460704	1	no	no	no	0
FBgn0005695	gcl	germ_cell-less	protein_coding	2R	174	223	156	204	130	139	125	173.894	203.482	140.805	192.04	150.066	139.974	129.491	161.393	0.0541888	0.359466	0.150748	0.880174	1	-0.237253	0.360035	-0.658972	0.509914	0.999669	-0.291442	0.304638	-0.956683	0.338727	1	no	no	no	0
FBgn0005696	DNApol-alpha73	DNA_polymerase_alpha_73kD	protein_coding	3R	179	186	174	173	158	182	259	178.891	169.72	157.052	162.858	182.388	183.276	268.306	186.07	-0.118528	0.354042	-0.334784	0.737788	1	0.193054	0.353937	0.545449	0.585445	0.999669	0.311582	0.296378	1.0513	0.293122	1	no	no	no	0
FBgn0005771	noc	no_ocelli	protein_coding	2L	596	427	840	733	549	474	508	595.637	389.627	758.18	690.027	633.739	477.322	526.252	581.541	0.0408744	0.324265	0.126052	0.899691	1	-0.105775	0.324458	-0.326006	0.74442	0.999669	-0.14665	0.260899	-0.562093	0.574052	1	no	no	no	0
FBgn0005775	Con	Connectin	protein_coding	3L	5	31	59	132	21	17	45	4.99696	28.2867	53.2531	124.261	24.2414	17.1192	46.6168	42.6822	0.835644	0.368104	2.27013	0.0231997	0.956113	0.217706	0.367665	0.59213	0.553763	0.999669	-0.617938	0.398748	-1.54969	0.121215	1	no	no	no	0
FBgn0005777	PpD3	Protein_phosphatase_D3	protein_coding	3R	554	610	528	491	369	661	338	553.663	556.61	476.57	462.214	425.956	665.633	350.144	498.684	-0.111761	0.324133	-0.344799	0.730245	1	-0.157706	0.324297	-0.486302	0.626753	0.999669	-0.0459455	0.260877	-0.176119	0.8602	1	no	no	no	0
FBgn0005778	PpD5	Protein_phosphatase_D5	protein_coding	2R	0	0	0	0	0	0	0	?	?	?	?	?	?	?	?	?	?	?	?	?	?	?	?	?	?	?	?	?	?	?	no	no	no	#VALUE!
FBgn0005779	PpD6	Protein_phosphatase_D6	protein_coding	2L	0	0	0	0	0	0	0	?	?	?	?	?	?	?	?	?	?	?	?	?	?	?	?	?	?	?	?	?	?	?	no	no	no	#VALUE!
FBgn0008635	betaCOP	Coat_Protein_(coatomer)_beta	protein_coding	X	580	570	634	602	463	584	338	579.647	520.111	572.245	566.707	534.465	588.093	350.144	530.202	-0.0450873	0.303493	-0.148562	0.8819	1	-0.199845	0.303768	-0.657886	0.510612	0.999669	-0.154758	0.239185	-0.647021	0.517618	1	no	no	no	0
FBgn0008636	hbn	homeobrain	protein_coding	2R	5	7	0	7	0	0	0	4.99696	6.38732	0	6.58962	0	0	0	2.5677	0.0254707	0.130972	0.194475	0.845804	1	-0.0953673	0.130741	-0.729437	0.465735	NA	-0.120838	0.170362	-0.709302	0.478137	NA	no	no	no	0
FBgn0008646	E5	E5	protein_coding	3R	60	50	144	42	117	218	37	59.9635	45.6237	129.974	39.5377	135.059	219.528	38.3294	95.4307	-0.0212398	0.38225	-0.0555652	0.955688	1	0.457014	0.382289	1.19547	0.231904	0.986613	0.478254	0.397863	1.20206	0.229341	1	no	no	no	0
FBgn0008651	lbl	ladybird_late	protein_coding	3R	18	0	193	12	0	21	0	17.9891	0	174.201	11.2965	0	21.1472	0	32.0905	0.0824925	0.136576	0.604005	NA	NA	-0.0495572	0.136554	-0.362912	NA	NA	-0.13205	0.177571	-0.743645	NA	NA	no	no	no	0
FBgn0010014	CanB	Calcineurin_B	protein_coding	X	10	5	11	36	29	0	23	9.99392	4.56237	9.92855	33.8895	33.4762	0	23.8264	16.5253	0.0441498	0.266592	0.165608	0.868465	1	0.0980641	0.266462	0.368023	0.712856	0.999669	0.0539142	0.326634	0.16506	0.868897	NA	no	no	no	0
FBgn0010015	CanA1	Calcineurin_A1	protein_coding	3R	27	122	33	66	44	28	73	26.9836	111.322	29.7856	62.1307	50.7915	28.1963	75.6229	54.9761	0.430974	0.38085	1.13161	0.257798	1	0.213367	0.380732	0.560411	0.575199	0.999669	-0.217607	0.398291	-0.546351	0.584825	1	no	no	no	0
FBgn0010019	Cyp4g1	Cytochrome_P450-4g1	protein_coding	X	1092	1309	2720	335	3237	2720	957	1091.34	1194.43	2455.06	315.36	3736.64	2739.06	991.385	1789.04	-0.0349351	0.361038	-0.0967629	0.922915	1	0.380069	0.361041	1.0527	0.292477	0.999669	0.415004	0.396805	1.04586	0.295624	1	no	no	no	0
FBgn0010038	GstD2	Glutathione_S_transferase_D2	protein_coding	3R	0	0	0	0	0	0	33	0	0	0	0	0	0	34.1857	4.88367	0	0.12425	0	NA	NA	0.108173	0.124231	0.870742	NA	NA	0.151486	0.16207	0.934697	NA	NA	no	no	no	0
FBgn0010039	GstD3	Glutathione_S_transferase_D3	protein_coding	3R	29	108	158	78	96	170	77	28.9824	98.5473	142.61	73.4271	110.818	171.192	79.7666	100.763	0.7348	0.391555	1.87662	0.0605701	1	0.87788	0.39158	2.24189	0.0249682	0.535299	0.14308	0.368215	0.388577	0.697589	1	no	no	no	0
FBgn0010040	GstD4	Glutathione_S_transferase_D4	protein_coding	3R	0	7	4	1	18	0	30	0	6.38732	3.61038	0.941374	20.7783	0	31.0779	8.97076	-0.0438956	0.22423	-0.195762	0.844797	1	0.290165	0.224349	1.29337	0.195885	NA	0.334061	0.282233	1.18363	0.236558	NA	no	no	no	0
FBgn0010041	GstD5	Glutathione_S_transferase_D5	protein_coding	3R	1	9	9	34	32	65	21	0.999392	8.21227	8.12336	32.0067	36.9393	65.4556	21.7545	24.7844	0.13313	0.340623	0.390843	0.695913	1	0.693147	0.340962	2.03292	0.0420608	0.659463	0.560017	0.388043	1.44318	0.148969	1	no	no	no	0
FBgn0010042	GstD6	Glutathione_S_transferase_D6	protein_coding	3R	0	0	0	0	3	0	15	0	0	0	0	3.46306	0	15.5389	2.71457	0	0.123278	0	1	1	0.106399	0.123242	0.863329	0.387956	NA	0.149036	0.160847	0.926567	0.354151	NA	no	no	no	0
FBgn0010043	GstD7	Glutathione_S_transferase_D7	protein_coding	3R	14	0	0	0	8	0	0	13.9915	0	0	0	9.23482	0	0	3.31804	-0.131732	0.123776	-1.06428	0.2872	1	-0.070345	0.123706	-0.568648	0.569595	NA	0.0613874	0.161344	0.380476	0.703592	NA	no	no	no	0
FBgn0010044	GstD8	Glutathione_S_transferase_D8	protein_coding	3R	0	0	0	0	0	0	0	?	?	?	?	?	?	?	?	?	?	?	?	?	?	?	?	?	?	?	?	?	?	?	no	no	no	#VALUE!
FBgn0010051	Itp-r83A	Inositol_1,4,5,-tris-phosphate_receptor	protein_coding	3R	870	840	926	1008	1111	1053	952	869.471	766.479	835.803	948.905	1282.49	1060.38	986.205	964.247	-0.0410998	0.247284	-0.166205	0.867996	1	0.320518	0.247185	1.29667	0.194744	0.960741	0.361617	0.186215	1.94194	0.0521448	1	no	no	no	0
FBgn0010052	Jhe	Juvenile_hormone_esterase	protein_coding	2R	21	0	0	2	6	0	0	20.9872	0	0	1.88275	6.92611	0	0	4.25658	-0.203382	0.15007	-1.35525	0.175338	1	-0.162368	0.149956	-1.08277	0.278911	NA	0.0410145	0.194136	0.211267	0.832679	NA	no	no	no	0
FBgn0010053	Jheh1	Juvenile_hormone_epoxide_hydrolase_1	protein_coding	2R	237	310	323	287	463	312	347	236.856	282.867	291.538	270.174	534.465	314.187	359.468	327.079	0.14753	0.331679	0.444798	0.656466	1	0.597185	0.331479	1.80158	0.0716121	0.800639	0.449654	0.268112	1.67711	0.0935205	1	no	no	no	0
FBgn0010078	RpL23	Ribosomal_protein_L23	protein_coding	2R	449	654	388	492	409	572	450	448.727	596.759	350.207	463.156	472.13	576.009	466.168	481.879	0.0460783	0.31306	0.147187	0.882984	1	0.137964	0.313148	0.44057	0.659524	0.999669	0.0918853	0.248571	0.369655	0.71164	1	no	no	no	0
FBgn0010097	gammaTub37C	gamma-Tubulin_at_37C	protein_coding	2L	132	199	318	172	134	177	134	131.92	181.583	287.025	161.916	154.683	178.241	138.815	176.312	0.45982	0.368049	1.24935	0.211539	1	0.121453	0.368503	0.329585	0.741714	0.999669	-0.338367	0.31637	-1.06953	0.284832	1	no	no	no	0
FBgn0010100	Acon	Aconitase	protein_coding	2L	6020	5511	6001	7270	5808	5465	5017	6016.34	5028.65	5416.47	6843.79	6704.48	5503.3	5197.26	5815.76	-0.0567636	0.212827	-0.266713	0.78969	1	-0.0475531	0.212857	-0.223404	0.823221	0.999669	0.00921048	0.157568	0.0584541	0.953387	1	no	no	no	0
FBgn0010105	comm	commissureless	protein_coding	3L	85	43	73	50	63	33	49	84.9483	39.2364	65.8894	47.0687	72.7242	33.2313	50.7606	56.2656	-0.323003	0.391304	-0.825455	0.409113	1	-0.298429	0.391312	-0.762636	0.44568	0.999669	0.0245743	0.389187	0.0631428	0.949653	1	no	no	no	0
FBgn0010109	dpn	deadpan	protein_coding	2R	161	151	139	106	138	250	103	160.902	137.784	125.461	99.7856	159.301	251.752	106.701	148.812	-0.280385	0.383332	-0.731441	0.46451	1	0.105206	0.383231	0.274523	0.783682	0.999669	0.385591	0.343954	1.12105	0.262265	1	no	no	no	0
FBgn0010113	hdc	headcase	protein_coding	3R	18517	23414	16763	16897	16095	15386	21477	18505.7	21364.7	15130.2	15906.4	18579.3	15493.8	22248.7	18175.5	-0.0777759	0.224586	-0.346308	0.729112	1	0.0215227	0.224591	0.0958306	0.923655	0.999669	0.0992986	0.167229	0.593788	0.552654	1	no	no	no	0
FBgn0010114	hig	hikaru_genki	protein_coding	2R	31	0	0	9	0	2	0	30.9811	0	0	8.47236	0	2.01402	0	5.92393	-0.219263	0.165871	-1.32189	0.186205	1	-0.267093	0.165699	-1.61192	0.10698	NA	-0.04783	0.213433	-0.224099	0.82268	NA	no	no	no	0
FBgn0010173	RpA-70	Replication_Protein_A_70	protein_coding	3R	471	250	907	623	264	543	232	470.714	228.119	818.654	586.476	304.749	546.806	240.336	456.55	0.174451	0.382607	0.455954	0.648423	1	-0.264462	0.382737	-0.690975	0.489581	0.999669	-0.438913	0.342588	-1.28117	0.200134	1	no	no	no	0
FBgn0010194	Wnt5	Wnt_oncogene_analog_5	protein_coding	X	1893	1997	2186	2275	1364	2140	1759	1891.85	1822.21	1973.07	2141.63	1574.54	2155	1822.2	1911.5	0.0611472	0.221509	0.276049	0.782511	1	-0.0310335	0.221636	-0.14002	0.888644	0.999669	-0.0921807	0.164706	-0.559667	0.575706	1	no	no	no	0
FBgn0010197	Gyc32E	Guanyl_cyclase_at_32E	protein_coding	2L	0	0	0	0	0	0	0	?	?	?	?	?	?	?	?	?	?	?	?	?	?	?	?	?	?	?	?	?	?	?	no	no	no	#VALUE!
FBgn0010198	RpS15Aa	Ribosomal_protein_S15Aa	protein_coding	X	2237	2208	2911	2203	1862	2343	2859	2235.64	2014.74	2627.45	2073.85	2149.4	2359.42	2961.72	2346.03	-0.00283238	0.233329	-0.012139	0.990315	1	0.143129	0.23335	0.613367	0.539633	0.999669	0.145962	0.174502	0.836447	0.402903	1	no	no	no	0
FBgn0010213	Sod2	Superoxide_dismutase_2_(Mn)	protein_coding	2R	695	644	721	812	560	772	821	694.577	587.634	650.771	764.395	646.437	777.411	850.498	710.246	-0.0559806	0.267542	-0.209241	0.83426	1	0.114918	0.267575	0.429478	0.667575	0.999669	0.170898	0.204414	0.83604	0.403133	1	no	no	no	0
FBgn0010215	alpha-Cat	alpha_Catenin	protein_coding	3L	407	318	466	244	299	336	280	406.752	290.167	420.609	229.695	345.151	338.355	290.06	331.542	-0.278595	0.336771	-0.827252	0.408094	1	-0.235894	0.336911	-0.700169	0.483822	0.999669	0.0427006	0.275511	0.154987	0.876832	1	no	no	no	0
FBgn0010217	ATPsyn-beta	ATP_synthase-beta	protein_coding	4	1202	976	1430	1052	995	1052	1220	1201.27	890.576	1290.71	990.325	1148.58	1059.37	1263.83	1120.67	-0.164565	0.252964	-0.650549	0.515338	1	-0.042189	0.253015	-0.166745	0.86757	0.999669	0.122376	0.191586	0.638756	0.522982	1	no	no	no	0
FBgn0010220	Dbp45A	DEAD_box_protein_45A	protein_coding	2R	78	64	48	37	50	52	11	77.9526	58.3984	43.3246	34.8308	57.7176	52.3645	11.3952	47.9977	-0.249611	0.376714	-0.6626	0.507587	1	-0.33262	0.376597	-0.883227	0.377114	0.999669	-0.0830093	0.399186	-0.207947	0.835271	1	no	no	no	0
FBgn0010222	Nmdmc	NAD-dependent_methylenetetrahydrofolate_dehydrogenase	protein_coding	3R	154	227	216	372	75	327	135	153.906	207.132	194.961	350.191	86.5764	329.292	139.851	208.844	0.390829	0.390983	0.999608	0.3175	1	0.0829152	0.391091	0.21201	0.832099	0.999669	-0.307914	0.365323	-0.842854	0.39931	1	no	no	no	0
FBgn0010223	Galphaf	G_protein_alpha_f_subunit	protein_coding	3L	6	0	0	10	6	0	11	5.99635	0	0	9.41374	6.92611	0	11.3952	4.81878	-0.0492272	0.165142	-0.29809	0.765635	1	0.0200056	0.165039	0.121217	0.903519	NA	0.0692328	0.21283	0.325296	0.744957	NA	no	no	no	0
FBgn0010225	Gel	Gelsolin	protein_coding	3R	1570	2428	1717	2417	2599	1713	2361	1569.05	2215.49	1549.76	2275.3	3000.16	1725.01	2445.83	2111.51	0.28793	0.27859	1.03353	0.301358	1	0.516056	0.278587	1.85241	0.0639676	0.785526	0.228125	0.214409	1.06397	0.287342	1	no	no	no	0
FBgn0010226	GstS1	Glutathione_S_transferase_S1	protein_coding	2R	2766	5151	5139	5181	3550	4894	3862	2764.32	4700.16	4638.44	4877.26	4097.95	4928.3	4000.76	4286.74	0.730802	0.179447	4.07253	4.65058e-05	0.0120581	0.608327	0.179529	3.38846	0.000702858	0.0562359	-0.122475	0.130529	-0.938299	0.348091	1	yes	yes	no	0
FBgn0010228	HmgZ	HMG_protein_Z	protein_coding	2R	2605	2375	1774	1817	1784	1549	1813	2603.42	2167.13	1601.2	1710.48	2059.36	1559.86	1878.14	1939.94	-0.455398	0.234589	-1.94126	0.0522273	1	-0.450942	0.234671	-1.92159	0.054657	0.742895	0.00445582	0.17598	0.0253201	0.9798	1	no	no	no	0
FBgn0010235	Klc	Kinesin_light_chain	protein_coding	3L	461	499	609	600	330	447	331	460.72	455.325	549.68	564.824	380.936	450.133	342.893	457.787	0.170313	0.289377	0.588549	0.556164	1	-0.212096	0.289972	-0.731437	0.464512	0.999669	-0.382409	0.225276	-1.69751	0.0896003	1	no	no	no	0
FBgn0010238	Lac	Lachesin	protein_coding	2R	3689	3844	4605	2865	2751	2822	3973	3686.76	3507.55	4156.45	2697.04	3175.62	2841.78	4115.75	3454.42	-0.0810143	0.249889	-0.324201	0.745786	1	-0.111213	0.249935	-0.444968	0.656343	0.999669	-0.0301987	0.188818	-0.159935	0.872932	1	no	no	no	0
FBgn0010240	Lcch3	Ligand-gated_chloride_channel_homolog_3	protein_coding	X	6	25	0	12	0	0	8	5.99635	22.8119	0	11.2965	0	0	8.28744	6.91316	0.0943983	0.182107	0.518369	0.604201	1	-0.0789167	0.181845	-0.433978	0.664304	NA	-0.173315	0.233194	-0.743221	0.457348	NA	no	no	no	0
FBgn0010241	Mdr50	Multi_drug_resistance_50	protein_coding	2R	21	41	0	7	32	0	21	20.9872	37.4115	0	6.58962	36.9393	0	21.7545	17.6689	-0.0565413	0.234668	-0.240942	0.8096	1	0.00817017	0.234587	0.0348278	0.972217	0.999669	0.0647114	0.293325	0.220614	0.825393	NA	no	no	no	0
FBgn0010246	Myo61F	Myosin_61F	protein_coding	3L	281	253	357	292	293	213	141	280.829	230.856	322.226	274.881	338.225	214.493	146.066	258.225	0.00356877	0.365954	0.00975195	0.992219	1	-0.19506	0.366205	-0.532653	0.594274	0.999669	-0.198629	0.313727	-0.633126	0.526651	1	no	no	no	0
FBgn0010247	Parp	Poly-(ADP-ribose)_polymerase	protein_coding	3R	319	540	728	649	384	567	482	318.806	492.736	657.089	610.952	443.271	570.974	499.318	513.307	0.728963	0.287454	2.53593	0.0112149	0.651752	0.529006	0.287807	1.83806	0.0660542	0.793046	-0.199957	0.221688	-0.901974	0.367071	1	no	no	no	0
FBgn0010258	Rbp4	RNA-binding_protein_4	protein_coding	3R	0	18	6	3	5	0	0	0	16.4245	5.41557	2.82412	5.77176	0	0	4.348	0.15599	0.172469	0.904452	0.365756	1	-0.0237315	0.172107	-0.137888	0.890329	NA	-0.179722	0.221669	-0.810765	0.417501	NA	no	no	no	0
FBgn0010263	Rbp9	RNA-binding_protein_9	protein_coding	2L	130	190	317	361	173	212	276	129.921	173.37	286.123	339.836	199.703	213.486	285.917	232.622	0.674106	0.363499	1.85449	0.0636687	1	0.515326	0.363752	1.41669	0.156572	0.934575	-0.15878	0.308772	-0.514231	0.60709	1	no	no	no	0
FBgn0010265	RpS13	Ribosomal_protein_S13	protein_coding	2L	31932	38182	37403	36596	28369	35830	39236	31912.6	34840.1	33759.8	34450.5	32747.8	36081.1	40645.7	34919.7	0.100017	0.157263	0.63599	0.524783	1	0.18547	0.157268	1.17933	0.238268	0.988348	0.0854523	0.113871	0.75043	0.452996	1	no	no	no	0
FBgn0010269	Dsor1	Downstream_of_raf1	protein_coding	X	276	322	353	327	251	410	363	275.832	293.817	318.616	307.829	289.742	412.874	376.042	324.965	0.105447	0.313076	0.336809	0.736261	1	0.310462	0.313085	0.991622	0.321382	0.999669	0.205015	0.248139	0.826211	0.408684	1	no	no	no	0
FBgn0010278	Ssrp	Structure_specific_recognition_protein	protein_coding	2R	1579	1436	1298	1558	1026	1402	1131	1578.04	1310.31	1171.57	1466.66	1184.37	1411.83	1171.64	1327.77	-0.233303	0.22616	-1.03158	0.302268	1	-0.297447	0.226325	-1.31425	0.188764	0.955141	-0.064144	0.168914	-0.379744	0.704135	1	no	no	no	0
FBgn0010280	Taf4	TBP-associated_factor_4	protein_coding	3L	3632	3294	3447	3188	2618	2920	2587	3629.79	3005.69	3111.25	3001.1	3022.09	2940.47	2679.95	3055.76	-0.241186	0.167767	-1.43763	0.15054	1	-0.316672	0.167885	-1.88624	0.0592622	0.761481	-0.0754857	0.122179	-0.617829	0.536688	1	no	no	no	0
FBgn0010282	TfIIFalpha	Transcription_factor_IIFalpha	protein_coding	3R	683	1007	777	751	588	1057	859	682.585	918.862	701.316	706.972	678.759	1064.41	889.864	806.109	0.14334	0.285467	0.502127	0.615579	1	0.307068	0.285495	1.07556	0.282123	0.999669	0.163728	0.220834	0.741407	0.458447	1	no	no	no	0
FBgn0010287	Trf	TBP-related_factor	protein_coding	2L	15	32	22	17	48	2	0	14.9909	29.1992	19.8571	16.0034	55.4089	2.01402	0	19.6391	0.0604033	0.263863	0.22892	0.818931	1	0.0211581	0.263694	0.0802372	0.936049	0.999669	-0.0392452	0.323837	-0.121188	0.903542	1	no	no	no	0
FBgn0010288	Uch	Ubiquitin_carboxy-terminal_hydrolase	protein_coding	2L	653	727	868	882	690	774	553	652.603	663.369	783.453	830.292	796.503	779.425	572.869	725.502	0.186892	0.272903	0.684831	0.493451	1	0.109236	0.27311	0.39997	0.689178	0.999669	-0.0776563	0.209213	-0.371183	0.710501	1	no	no	no	0
FBgn0010292	bys	by_S6	protein_coding	X	63	103	81	147	79	32	161	62.9617	93.9849	73.1102	138.382	91.1938	32.2243	166.785	94.0916	0.259715	0.389511	0.666772	0.504918	1	0.214783	0.389504	0.551426	0.581341	0.999669	-0.0449321	0.391822	-0.114675	0.908703	1	no	no	no	0
FBgn0010294	ng2	new_glue_2	protein_coding	X	0	0	4	0	0	0	0	0	0	3.61038	0	0	0	0	0.515769	0.0883657	0.115816	0.762986	0.445472	NA	0	0.115302	0	1	NA	-0.121339	0.151362	-0.801648	0.422757	NA	no	no	no	0
FBgn0010295	ng3	new_glue_3	protein_coding	X	9	0	0	0	0	0	0	8.99453	0	0	0	0	0	0	1.28493	-0.183323	0.12105	-1.51444	0.129914	1	-0.182604	0.120798	-1.51164	0.130625	NA	0	0.157511	0	1	NA	no	no	no	0
FBgn0010296	ng4	new_glue_4	protein_coding	X	0	0	0	0	0	0	0	?	?	?	?	?	?	?	?	?	?	?	?	?	?	?	?	?	?	?	?	?	?	?	no	no	no	#VALUE!
FBgn0010300	brat	brain_tumor	protein_coding	2L	5041	6366	5247	3447	4389	4935	5501	5037.93	5808.82	4735.92	3244.92	5066.45	4969.59	5698.65	4937.47	-0.121945	0.248669	-0.49039	0.623858	1	0.0572153	0.248673	0.230082	0.818028	0.999669	0.17916	0.187707	0.954466	0.339848	1	no	no	no	0
FBgn0010303	hep	hemipterous	protein_coding	X	1601	2079	1605	1731	1598	1702	1302	1600.03	1897.04	1448.67	1629.52	1844.65	1713.93	1348.78	1640.37	0.0463184	0.238884	0.193894	0.846259	1	0.0274193	0.238983	0.114733	0.908657	0.999669	-0.0188991	0.179266	-0.105425	0.916038	1	no	no	no	0
FBgn0010309	pigeon	pigeon	protein_coding	2L	183	123	123	160	103	129	96	182.889	112.234	111.019	150.62	118.898	129.904	99.4493	129.288	-0.344885	0.371775	-0.92767	0.353579	1	-0.42512	0.372091	-1.14252	0.25324	0.999669	-0.0802351	0.323619	-0.247931	0.804188	1	no	no	no	0
FBgn0010313	corto	corto	protein_coding	3R	1870	1235	1395	1170	1079	931	1120	1868.86	1126.91	1259.12	1101.41	1245.55	937.525	1160.24	1242.8	-0.610581	0.231326	-2.63948	0.00830324	0.545732	-0.668693	0.2315	-2.88852	0.00387064	0.182061	-0.0581113	0.17366	-0.334628	0.737906	1	no	no	no	0
FBgn0010314	Cks30A	Cyclin-dependent_kinase_subunit_30A	protein_coding	2L	3011	3677	3321	2844	2426	3620	3131	3009.17	3355.17	2997.52	2677.27	2800.46	3645.37	3243.5	3104.06	-0.00200882	0.20783	-0.00966568	0.992288	1	0.0958896	0.207863	0.461312	0.644575	0.999669	0.0978984	0.153457	0.637952	0.523505	1	no	no	no	0
FBgn0010315	CycD	Cyclin_D	protein_coding	X	353	270	256	248	200	360	269	352.785	246.368	231.064	233.461	230.87	362.523	278.665	276.534	-0.447534	0.330347	-1.35474	0.175501	1	-0.190697	0.330301	-0.577343	0.563708	0.999669	0.256837	0.268224	0.957547	0.338291	1	no	no	no	0
FBgn0010316	dap	dacapo	protein_coding	2R	832	673	691	572	477	623	505	831.494	614.096	623.693	538.466	550.626	627.367	523.145	615.555	-0.421623	0.256954	-1.64085	0.100829	1	-0.479737	0.257233	-1.86499	0.0621827	0.77702	-0.0581143	0.195969	-0.296549	0.766811	1	no	no	no	0
FBgn0010317	CycJ	Cyclin_J	protein_coding	3L	119	124	350	251	119	111	223	118.928	113.147	315.908	236.285	137.368	111.778	231.012	180.632	0.509604	0.3885	1.31172	0.189614	1	0.165829	0.388681	0.426647	0.669637	0.999669	-0.343774	0.356819	-0.963441	0.335326	1	no	no	no	0
FBgn0010323	Gsc	Goosecoid	protein_coding	2L	6	1	11	2	8	1	0	5.99635	0.912475	9.92855	1.88275	9.23482	1.00701	0	4.13742	-0.0205862	0.193477	-0.106401	0.915264	1	-0.0524115	0.193153	-0.271347	0.786124	NA	-0.0318253	0.246534	-0.129091	0.897286	NA	no	no	no	0
FBgn0010328	woc	without_children	protein_coding	3R	1562	1661	1422	1296	1270	1492	1443	1561.05	1515.62	1283.49	1220.02	1466.03	1502.46	1494.85	1434.79	-0.204951	0.210075	-0.975609	0.329258	1	-0.0596938	0.210117	-0.284098	0.776336	0.999669	0.145257	0.155472	0.934298	0.35015	1	no	no	no	0
FBgn0010329	Tbh	Tyramine_beta_hydroxylase	protein_coding	X	62	119	62	154	44	54	99	61.9623	108.585	55.9609	144.972	50.7915	54.3785	102.557	82.7438	0.371613	0.39232	0.947219	0.343527	1	0.00196819	0.392398	0.00501579	0.995998	0.999822	-0.369645	0.383779	-0.963171	0.335462	1	no	no	no	0
FBgn0010333	Rac1	Rac1	protein_coding	3L	2320	2380	2460	2308	1974	2458	2438	2318.59	2171.69	2220.38	2172.69	2278.69	2475.23	2525.6	2308.98	-0.0810095	0.174165	-0.465131	0.641837	1	0.0643429	0.174199	0.369364	0.711856	0.999669	0.145352	0.126859	1.14578	0.251885	1	no	no	no	0
FBgn0010339	128up	upstream_of_RpIII128	protein_coding	2R	528	335	531	493	386	437	426	527.679	305.679	479.278	464.097	445.58	440.063	441.306	443.383	-0.275902	0.305901	-0.901933	0.367093	1	-0.197537	0.30602	-0.645503	0.518602	0.999669	0.0783651	0.241773	0.324126	0.745842	1	no	no	no	0
FBgn0010340	140up	upstream_of_RpII140	protein_coding	3R	15	7	9	12	48	0	49	14.9909	6.38732	8.12336	11.2965	55.4089	0	50.7606	20.9954	-0.188636	0.282308	-0.66819	0.504012	1	0.282286	0.282515	0.999191	0.317702	0.999669	0.470922	0.341882	1.37744	0.168377	1	no	no	no	0
FBgn0010341	Cdc42	Cdc42	protein_coding	X	9590	12685	10444	9502	10618	12401	11566	9584.17	11574.7	9426.7	8944.93	12256.9	12487.9	11981.6	10893.8	0.0502511	0.176135	0.285298	0.775416	1	0.336877	0.176128	1.91268	0.0557891	0.745795	0.286625	0.128327	2.23355	0.0255125	1	no	no	no	0
FBgn0010342	Map60	Microtubule-associated_protein_60	protein_coding	2R	761	707	858	583	509	555	718	760.537	645.12	774.427	548.821	587.565	558.89	743.798	659.88	-0.174329	0.282087	-0.617997	0.536577	1	-0.227965	0.282286	-0.807567	0.41934	0.999669	-0.053636	0.218343	-0.24565	0.805953	1	no	no	no	0
FBgn0010348	Arf79F	ADP_ribosylation_factor_at_79F	protein_coding	3L	3234	3222	2584	2503	2260	2811	2767	3232.03	2939.99	2332.31	2356.26	2608.84	2830.7	2866.42	2738.08	-0.322085	0.198111	-1.62578	0.103997	1	-0.203534	0.198145	-1.02719	0.304329	0.999669	0.118551	0.145863	0.812755	0.416358	1	no	no	no	0
FBgn0010350	CdsA	CDP_diglyceride_synthetase	protein_coding	3L	558	324	461	456	420	416	287	557.661	295.642	416.096	429.266	484.828	418.916	297.312	414.246	-0.423627	0.325521	-1.30138	0.193128	1	-0.359144	0.325636	-1.1029	0.27007	0.999669	0.0644825	0.262801	0.245367	0.806173	1	no	no	no	0
FBgn0010352	Nc73EF	Neural_conserved_at_73EF	protein_coding	3L	2041	2298	2226	2287	2206	1996	1949	2039.76	2096.87	2009.18	2152.92	2546.5	2009.99	2019.03	2124.89	0.0282201	0.20512	0.137578	0.890574	1	0.0965072	0.205181	0.470351	0.638105	0.999669	0.0682871	0.151247	0.451495	0.651633	1	no	no	no	0
FBgn0010355	Taf1	TBP-associated_factor_1	protein_coding	3R	542	543	671	686	462	310	410	541.67	495.474	605.641	645.782	533.311	312.173	424.731	508.398	0.107206	0.311576	0.344077	0.730788	1	-0.303439	0.312028	-0.972473	0.330815	0.999669	-0.410645	0.247578	-1.65865	0.0971861	1	no	no	no	0
FBgn0010356	Taf5	TBP-associated_factor_5	protein_coding	2R	282	401	409	362	264	438	427	281.828	365.902	369.161	340.777	304.749	441.07	442.342	363.69	0.261545	0.311471	0.839708	0.401072	1	0.390226	0.311553	1.25252	0.210381	0.973953	0.128681	0.246243	0.522576	0.601269	1	no	no	no	0
FBgn0010357	betaTry	betaTrypsin	protein_coding	2R	31	33	0	16	0	0	2	30.9811	30.1117	0	15.062	0	0	2.07186	11.1752	-0.049938	0.220892	-0.226075	0.821143	1	-0.350407	0.220483	-1.58927	0.112	NA	-0.300469	0.277711	-1.08195	0.279275	NA	no	no	no	0
FBgn0010358	deltaTry	deltaTrypsin	protein_coding	2R	9	11	0	0	0	0	0	8.99453	10.0372	0	0	0	0	0	2.71882	-0.0327567	0.123451	-0.265341	0.790746	1	-0.111827	0.123291	-0.90702	0.364396	NA	-0.0790707	0.160883	-0.491479	0.623087	NA	no	no	no	0
FBgn0010359	gammaTry	gammaTrypsin	protein_coding	2R	0	0	0	0	0	0	0	?	?	?	?	?	?	?	?	?	?	?	?	?	?	?	?	?	?	?	?	?	?	?	no	no	no	#VALUE!
FBgn0010379	Akt1	Akt1	protein_coding	3R	1361	1290	1157	1226	1141	1011	1223	1360.17	1177.09	1044.3	1154.12	1317.12	1018.09	1266.94	1191.12	-0.24742	0.229685	-1.07722	0.281384	1	-0.158465	0.229765	-0.689686	0.490392	0.999669	0.0889546	0.171768	0.517876	0.604544	1	no	no	no	0
FBgn0010380	AP-1-2beta	Adaptor_Protein_complex_1/2,_beta_subunit	protein_coding	X	800	920	745	863	592	679	869	799.513	839.477	672.433	812.406	683.377	683.759	900.223	770.17	-0.0373023	0.265565	-0.140464	0.888293	1	-0.0704107	0.265745	-0.264956	0.791043	0.999669	-0.0331084	0.202836	-0.163227	0.870339	1	no	no	no	0
FBgn0010381	Drs	Drosomycin	protein_coding	3L	123	943	36	612	4066	1	398	122.925	860.464	32.4934	576.121	4693.6	1.00701	412.3	956.987	-0.0289473	0.212758	-0.136057	0.891776	1	0.214676	0.212758	1.00901	0.312969	0.999669	0.243623	0.269045	0.90551	0.365195	1	no	no	no	0
FBgn0010382	CycE	Cyclin_E	protein_coding	2L	1705	1741	1810	1606	1273	1673	1435	1703.96	1588.62	1633.7	1511.85	1469.49	1684.73	1486.56	1582.7	-0.101743	0.19684	-0.516881	0.605239	1	-0.129369	0.196988	-0.656734	0.511352	0.999669	-0.0276261	0.144853	-0.190718	0.848747	1	no	no	no	0
FBgn0010383	Cyp18a1	Cytochrome_P450-18a1	protein_coding	X	50	40	56	90	47	61	40	49.9696	36.499	50.5453	84.7236	54.2546	61.4276	41.4372	54.1224	0.0905342	0.390396	0.231903	0.816613	1	0.0127539	0.390396	0.032669	0.973939	0.999669	-0.0777804	0.39042	-0.199222	0.842089	1	no	no	no	0
FBgn0010385	Def	Defensin	protein_coding	2R	0	0	0	0	0	0	0	?	?	?	?	?	?	?	?	?	?	?	?	?	?	?	?	?	?	?	?	?	?	?	no	no	no	#VALUE!
FBgn0010387	Dbi	Diazepam-binding_inhibitor	protein_coding	3L	0	60	9	11	139	19	42	0	54.7485	8.12336	10.3551	160.455	19.1332	43.509	42.332	0.0886956	0.332288	0.266924	0.789527	1	0.705071	0.332517	2.1204	0.033972	0.613557	0.616376	0.382606	1.61099	0.107181	1	no	no	no	0
FBgn0010388	Dro	Drosocin	protein_coding	2R	42	924	82	13	123	0	1047	41.9745	843.127	74.0128	12.2379	141.985	0	1084.62	313.994	0.0475851	0.189233	0.251464	0.801456	1	0.0934481	0.18923	0.493834	0.621424	0.999669	0.045863	0.241793	0.189679	0.849561	1	no	no	no	0
FBgn0010389	htl	heartless	protein_coding	3R	117	51	61	113	63	119	162	116.929	46.5362	55.0583	106.375	72.7242	119.834	167.821	97.8968	-0.425525	0.392893	-1.08306	0.278784	1	0.0966165	0.39282	0.245956	0.805716	0.999669	0.522142	0.377537	1.38302	0.166659	1	no	no	no	0
FBgn0010391	Gtp-bp	GTP-binding_protein	protein_coding	X	236	270	287	270	173	223	340	235.856	246.368	259.045	254.171	199.703	224.563	352.216	253.132	0.0692472	0.347584	0.199224	0.842087	1	0.0965294	0.347747	0.277585	0.781331	0.999669	0.0272822	0.288102	0.0946964	0.924556	1	no	no	no	0
FBgn0010395	Itgbetanu	Integrin_betanu_subunit	protein_coding	2L	1	3	0	9	27	0	8	0.999392	2.73742	0	8.47236	31.1675	0	8.28744	7.38059	-0.028802	0.203256	-0.141703	0.887314	1	0.193742	0.203264	0.953159	0.34051	NA	0.222544	0.25832	0.861507	0.388959	NA	no	no	no	0
FBgn0010397	LamC	Lamin_C	protein_coding	2R	228	297	161	189	435	244	257	227.861	271.005	145.318	177.92	502.143	245.71	266.234	262.313	-0.191061	0.37326	-0.51187	0.608742	1	0.41892	0.373064	1.12292	0.261472	0.999669	0.609981	0.324706	1.87856	0.0603042	1	no	no	no	0
FBgn0010398	Lrr47	Leucine-rich_repeat_47	protein_coding	2L	32	23	75	49	63	43	35	31.9805	20.9869	67.6946	46.1273	72.7242	43.3014	36.2575	45.5818	0.129543	0.380758	0.340224	0.733688	1	0.223917	0.380719	0.588142	0.556437	0.999669	0.0943735	0.398353	0.236909	0.812727	1	no	no	no	0
FBgn0010399	Nmdar1	NMDA_receptor_1	protein_coding	3R	0	18	0	36	3	0	0	0	16.4245	0	33.8895	3.46306	0	0	7.68244	0.21355	0.178911	1.19361	0.232631	1	-0.0696933	0.178608	-0.390203	0.696386	NA	-0.283243	0.229411	-1.23465	0.21696	NA	no	no	no	0
FBgn0010401	Os-C	Os-C	protein_coding	3R	9	0	0	0	0	0	0	8.99453	0	0	0	0	0	0	1.28493	-0.183323	0.12105	-1.51444	0.129914	1	-0.182604	0.120798	-1.51164	0.130625	NA	0	0.157511	0	1	NA	no	no	no	0
FBgn0010403	Obp83b	Odorant-binding_protein_83b	protein_coding	3R	0	0	0	0	0	0	0	?	?	?	?	?	?	?	?	?	?	?	?	?	?	?	?	?	?	?	?	?	?	?	no	no	no	#VALUE!
FBgn0010406	RNaseX25	Ribonuclease_X25	protein_coding	3L	274	152	264	221	168	292	210	273.833	138.696	238.285	208.044	193.931	294.047	217.545	223.483	-0.350389	0.35922	-0.975415	0.329355	1	-0.12773	0.359213	-0.355582	0.722154	0.999669	0.222659	0.304037	0.732341	0.46396	1	no	no	no	0
FBgn0010407	Ror	Ror	protein_coding	2L	6	12	0	24	18	0	23	5.99635	10.9497	0	22.593	20.7783	0	23.8264	12.0205	0.0275366	0.225043	0.122362	0.902613	1	0.0917289	0.224939	0.407795	0.683424	NA	0.0641922	0.282856	0.226943	0.820468	NA	no	no	no	0
FBgn0010408	RpS9	Ribosomal_protein_S9	protein_coding	3L	3320	3788	3504	2445	3371	2630	4412	3317.98	3456.46	3162.69	2301.66	3891.32	2648.43	4570.52	3335.58	-0.146648	0.269755	-0.543635	0.586692	1	0.147103	0.269742	0.545346	0.585515	0.999669	0.293751	0.206481	1.42266	0.154836	1	no	no	no	0
FBgn0010409	RpL18A	Ribosomal_protein_L18A	protein_coding	2R	33609	36148	38649	37202	28629	37455	38864	33588.6	32984.1	34884.4	35021	33048	37717.5	40260.4	35357.7	0.0272881	0.155415	0.175582	0.860623	1	0.134883	0.155419	0.867866	0.385468	0.999669	0.107595	0.112472	0.956636	0.338751	1	no	no	no	0
FBgn0010411	RpS18	Ribosomal_protein_S18	protein_coding	2R	929	1139	899	1010	762	939	1193	928.435	1039.31	811.433	950.787	879.616	945.582	1235.86	970.147	0.0022587	0.261454	0.00863901	0.993107	1	0.121803	0.261509	0.46577	0.64138	0.999669	0.119545	0.198906	0.601009	0.547834	1	no	no	no	0
FBgn0010412	RpS19a	Ribosomal_protein_S19a	protein_coding	X	16876	18128	18662	17843	14515	19120	19004	16865.7	16541.3	16844.2	16796.9	16755.4	19254	19686.8	17534.9	-0.0131791	0.150496	-0.0875713	0.930217	1	0.13441	0.150501	0.893088	0.37181	0.999669	0.14759	0.108742	1.35725	0.174702	1	no	no	no	0
FBgn0010414	SerT	Serotonin_transporter	protein_coding	2R	0	0	0	0	0	0	0	?	?	?	?	?	?	?	?	?	?	?	?	?	?	?	?	?	?	?	?	?	?	?	no	no	no	#VALUE!
FBgn0010415	Sdc	Syndecan	protein_coding	2R	4528	5811	5254	7165	5431	4170	5051	4525.25	5302.39	4742.23	6744.94	6269.29	4199.23	5232.48	5287.97	0.274375	0.237029	1.15756	0.247044	1	0.182619	0.237069	0.770322	0.441109	0.999669	-0.0917557	0.17763	-0.516555	0.605467	1	no	no	no	0
FBgn0010416	TH1	TH1	protein_coding	X	1268	1495	1325	1676	1027	1073	1085	1267.23	1364.15	1195.94	1577.74	1185.52	1080.52	1123.98	1256.44	0.117687	0.226181	0.520323	0.602839	1	-0.15646	0.226481	-0.690831	0.489672	0.999669	-0.274147	0.168713	-1.62493	0.104178	1	no	no	no	0
FBgn0010417	Taf6	TBP-associated_factor_6	protein_coding	3L	1232	1464	1336	1346	1178	1392	1273	1231.25	1335.86	1205.87	1267.09	1359.83	1401.76	1318.74	1302.91	0.0386188	0.199709	0.193375	0.846665	1	0.134504	0.199794	0.673216	0.50081	0.999669	0.0958856	0.14682	0.653082	0.513703	1	no	no	no	0
FBgn0010421	TfIIFbeta	Transcription_factor_TFIIFbeta	protein_coding	3R	30	46	33	52	39	22	30	29.9818	41.9738	29.7856	48.9514	45.0197	22.1542	31.0779	35.5635	0.16831	0.380913	0.44186	0.658591	1	0.00764123	0.380754	0.0200687	0.983989	0.999822	-0.160669	0.398361	-0.403325	0.686709	1	no	no	no	0
FBgn0010422	TfIIS	RNA_polymerase_II_elongation_factor	protein_coding	2L	1029	1150	1128	1003	684	820	1092	1028.37	1049.35	1018.13	944.198	789.577	825.747	1131.24	969.515	-0.0251719	0.256656	-0.0980764	0.921872	1	-0.149442	0.256868	-0.581788	0.56071	0.999669	-0.12427	0.194918	-0.637553	0.523765	1	no	no	no	0
FBgn0010423	TpnC47D	Troponin_C_at_47D	protein_coding	2R	0	0	0	0	0	0	15	0	0	0	0	0	0	15.5389	2.21985	0	0.122803	0	NA	NA	0.105537	0.122758	0.859711	NA	NA	0.147845	0.160248	0.922601	NA	NA	no	no	no	0
FBgn0010424	TpnC73F	Troponin_C_at_73F	protein_coding	3L	661	188	117	149	402	570	905	660.598	171.545	105.604	140.265	464.05	573.995	937.516	436.225	-1.73964	0.347697	-5.00331	5.63546e-07	0.000219176	0.141242	0.346451	0.407681	0.683508	0.999669	1.88088	0.288949	6.50937	7.54651e-11	4.74675e-07	yes	no	yes	0
FBgn0010425	epsilonTry	epsilonTrypsin	protein_coding	2R	62	26	5	0	0	18	0	61.9623	23.7243	4.51298	0	0	18.1262	0	15.4751	-0.261308	0.211682	-1.23444	0.217041	1	-0.308685	0.21155	-1.45916	0.144521	0.924298	-0.0473771	0.267527	-0.177093	0.859435	NA	no	no	no	0
FBgn0010431	mtrm	matrimony	protein_coding	3L	58	13	32	43	22	56	15	57.9647	11.8622	28.883	40.4791	25.3957	56.3925	15.5389	33.788	-0.335804	0.361724	-0.928343	0.35323	1	-0.224145	0.361653	-0.619778	0.535404	0.999669	0.111659	0.396858	0.281358	0.778436	1	no	no	no	0
FBgn0010433	ato	atonal	protein_coding	3R	8	8	5	4	0	0	2	7.99513	7.2998	4.51298	3.76549	0	0	2.07186	3.66361	0.0020352	0.191419	0.0106321	0.991517	1	-0.194793	0.190802	-1.02092	0.307294	NA	-0.196828	0.243763	-0.807457	0.419403	NA	no	no	no	0
FBgn0010434	cora	coracle	protein_coding	2R	6208	7889	4937	4195	7448	5963	6402	6204.22	7198.51	4456.11	3949.06	8597.62	6004.8	6632.02	6148.91	-0.233001	0.271515	-0.85815	0.390809	1	0.178855	0.271498	0.658771	0.510043	0.999669	0.411856	0.208099	1.97913	0.047801	1	no	no	no	0
FBgn0010435	emp	epithelial_membrane_protein	protein_coding	2R	182	216	656	359	139	203	268	181.889	197.095	592.102	337.953	160.455	204.423	277.629	278.792	0.678528	0.380164	1.78483	0.0742891	1	0.052912	0.380466	0.139072	0.889394	0.999669	-0.625616	0.337472	-1.85383	0.0637636	1	no	no	no	0
FBgn0010438	mtSSB	mitochondrial_single_stranded_DNA-binding_protein	protein_coding	3R	120	135	191	108	66	211	108	119.927	123.184	172.396	101.668	76.1872	212.479	111.88	131.103	0.0702461	0.390763	0.179766	0.857336	1	0.079396	0.390834	0.203145	0.839022	0.999669	0.00914989	0.364358	0.0251124	0.979965	1	no	no	no	0
FBgn0010441	pll	pelle	protein_coding	3R	146	96	106	83	144	99	151	145.911	87.5976	95.6751	78.134	166.227	99.6939	156.425	118.523	-0.499908	0.380034	-1.31543	0.188366	1	0.0280315	0.379754	0.0738149	0.941158	0.999669	0.527939	0.337351	1.56495	0.117594	1	no	no	no	0
FBgn0010452	trn	tartan	protein_coding	3L	185	230	791	390	152	204	546	184.887	209.869	713.953	367.136	175.462	205.43	565.618	346.051	0.621116	0.391225	1.58762	0.112373	1	0.303979	0.391288	0.776867	0.437237	0.999669	-0.317137	0.366276	-0.86584	0.386578	1	no	no	no	0
FBgn0010453	Wnt4	Wnt_oncogene_analog_4	protein_coding	2L	4508	4178	3977	3625	2726	3562	3164	4505.26	3812.32	3589.62	3412.48	3146.76	3586.97	3277.68	3618.73	-0.302088	0.170466	-1.77213	0.0763729	1	-0.410523	0.170576	-2.40669	0.0160979	0.444224	-0.108435	0.124266	-0.872604	0.382879	1	no	no	no	0
FBgn0010470	Fkbp14	FK506-binding_protein_14_ortholog	protein_coding	2R	1317	1154	1441	1509	1193	1104	1222	1316.2	1053	1300.64	1420.53	1377.14	1111.74	1265.91	1263.59	-0.0574046	0.239358	-0.239827	0.810464	1	-0.0645925	0.23948	-0.26972	0.787375	0.999669	-0.00718793	0.179785	-0.0399807	0.968109	1	no	no	no	0
FBgn0010473	tutl	turtle	protein_coding	2L	1327	5264	4681	3853	3865	4684	4746	1326.19	4803.27	4225.05	3627.11	4461.57	4716.83	4916.52	4010.94	1.53852	0.194328	7.91712	2.43068e-15	6.14476e-12	1.68898	0.194342	8.69073	3.6012e-18	5.58978e-15	0.150456	0.141192	1.06562	0.286597	1	yes	yes	no	1
FBgn0010482	l(2)01289	lethal_(2)_01289	protein_coding	2R	63	68	201	88	107	92	76	62.9617	62.0483	181.422	82.8409	123.516	92.6448	78.7307	97.7377	0.355502	0.392661	0.905364	0.365272	1	0.256856	0.392726	0.654034	0.51309	0.999669	-0.0986454	0.377968	-0.260988	0.794101	1	no	no	no	0
FBgn0010488	NAT1	NAT1	protein_coding	2R	4649	3997	4643	4395	3074	4090	3523	4646.17	3647.16	4190.75	4137.34	3548.48	4118.67	3649.58	3991.16	-0.204456	0.177106	-1.15443	0.248325	1	-0.283744	0.17719	-1.60135	0.109299	0.903259	-0.0792885	0.129303	-0.613199	0.539745	1	no	no	no	0
FBgn0010497	dmGlut	Dietary_and_metabolic_glutamate_transporter	protein_coding	2L	173	230	182	186	175	227	362	172.895	209.869	164.272	175.096	202.012	228.591	375.007	218.249	0.00768341	0.362011	0.0212243	0.983067	1	0.46208	0.361824	1.27709	0.201572	0.965083	0.454397	0.306985	1.48019	0.138822	1	no	no	no	0
FBgn0010501	Dcp-1	Death_caspase-1	protein_coding	2R	1793	2331	1762	2221	1502	2000	2225	1791.91	2126.98	1590.37	2090.79	1733.84	2014.02	2304.94	1950.41	0.0972081	0.235128	0.413426	0.679294	1	0.153876	0.235185	0.654278	0.512933	0.999669	0.0566682	0.175982	0.322011	0.747444	1	no	no	no	0
FBgn0010504	kermit	kermit	protein_coding	2R	187	225	378	402	254	297	271	186.886	205.307	341.181	378.432	293.205	299.082	280.737	283.547	0.510442	0.34467	1.48096	0.138617	1	0.439177	0.344897	1.27336	0.202891	0.968412	-0.0712653	0.283625	-0.251266	0.801608	1	no	no	no	0
FBgn0010516	wal	walrus	protein_coding	2R	1001	1023	1167	1109	1020	964	949	1000.39	933.462	1053.33	1043.98	1177.44	970.757	983.097	1023.21	0.0112869	0.2297	0.0491376	0.96081	1	0.0557655	0.229823	0.242646	0.80828	0.999669	0.0444786	0.171474	0.259389	0.795335	1	no	no	no	0
FBgn0010520	Bka	Bekka	protein_coding	2L	262	242	342	221	95	213	96	261.841	220.819	308.688	208.044	109.663	214.493	99.4493	203.285	0.0103226	0.376121	0.0274449	0.978105	1	-0.609393	0.37663	-1.61802	0.105659	0.890098	-0.619716	0.330828	-1.87323	0.0610372	1	no	no	no	0
FBgn0010531	Ccs	Copper_chaperone_for_superoxide_dismutase	protein_coding	2R	5	15	0	6	0	16	4	4.99696	13.6871	0	5.64824	0	16.1121	4.14372	6.36974	0.0148771	0.198433	0.0749731	0.940236	1	0.0230311	0.198245	0.116175	0.907514	NA	0.00815397	0.252511	0.0322915	0.97424	NA	no	no	no	0
FBgn0010548	Aldh-III	Aldehyde_dehydrogenase_type_III	protein_coding	2R	2284	2298	2317	1998	1617	1739	1685	2282.61	2096.87	2091.31	1880.86	1866.59	1751.19	1745.54	1959.28	-0.159477	0.184313	-0.865252	0.3869	1	-0.332673	0.184529	-1.80282	0.0714158	0.800639	-0.173195	0.135116	-1.28183	0.199903	1	no	no	no	0
FBgn0010549	l(2)03659	lethal_(2)_03659	protein_coding	2R	4	9	9	8	0	0	0	3.99757	8.21227	8.12336	7.53099	0	0	0	3.9806	0.143895	0.184526	0.779807	0.435505	1	-0.156673	0.183866	-0.852107	0.394155	NA	-0.300568	0.235795	-1.2747	0.202414	NA	no	no	no	0
FBgn0010551	Phb2	Prohibitin_2	protein_coding	2R	3590	3345	3949	3532	3164	3199	3047	3587.82	3052.23	3564.35	3324.93	3652.37	3221.42	3156.48	3365.66	-0.107547	0.18122	-0.593461	0.552873	1	-0.0952155	0.181286	-0.525222	0.599429	0.999669	0.0123318	0.132426	0.0931218	0.925807	1	no	no	no	0
FBgn0010575	sbb	scribbler	protein_coding	2R	4094	3591	3647	3512	2507	3377	2592	4091.51	3276.7	3291.76	3306.1	2893.96	3400.67	2685.13	3277.98	-0.290504	0.185639	-1.56488	0.117611	1	-0.423325	0.185755	-2.27894	0.0226706	0.50705	-0.132821	0.136072	-0.976114	0.329008	1	no	no	no	0
FBgn0010583	dock	dreadlocks	protein_coding	2L	1363	1250	1473	1601	985	1224	924	1362.17	1140.59	1329.52	1507.14	1137.04	1232.58	957.199	1238.03	-0.0263586	0.241003	-0.10937	0.912909	1	-0.269823	0.24126	-1.11839	0.2634	0.999669	-0.243464	0.18137	-1.34236	0.179479	1	no	no	no	0
FBgn0010590	Prosbeta1	Proteasome_beta1_subunit	protein_coding	2R	425	219	195	273	224	291	234	424.742	199.832	176.006	256.995	258.575	293.04	242.408	264.514	-0.779174	0.330587	-2.35694	0.018426	0.848655	-0.495188	0.330504	-1.49828	0.13406	0.917806	0.283987	0.269167	1.05506	0.291399	1	no	no	no	0
FBgn0010591	Sply	Sphingosine-1-phosphate_lyase	protein_coding	2R	3047	4302	3106	2676	4334	4430	3543	3045.15	3925.47	2803.46	2519.12	5002.96	4461.05	3670.3	3632.5	-0.00174187	0.24663	-0.00706269	0.994365	1	0.475317	0.246583	1.92761	0.0539032	0.737818	0.477059	0.185803	2.56755	0.0102419	1	no	no	no	0
FBgn0010602	lwr	lesswright	protein_coding	2L	4842	5643	5581	5457	4756	4836	5176	4839.05	5149.1	5037.38	5137.08	5490.1	4869.9	5361.97	5126.37	0.0739078	0.155581	0.475043	0.634757	1	0.110116	0.155627	0.707565	0.479215	0.999669	0.0362087	0.112562	0.321677	0.747698	1	no	no	no	0
FBgn0010607	l(2)05714	lethal_(2)_05714	protein_coding	2L	97	67	80	62	28	94	30	96.941	61.1358	72.2076	58.3652	32.3219	94.6589	31.0779	63.8155	-0.221118	0.389236	-0.568082	0.569979	1	-0.380096	0.389211	-0.976581	0.328777	0.999669	-0.158978	0.392909	-0.404619	0.685758	1	no	no	no	0
FBgn0010611	Hmgs	HMG_Coenzyme_A_synthase	protein_coding	2R	338	311	472	354	270	471	475	337.794	283.78	426.025	333.246	311.675	474.301	492.067	379.841	0.0116517	0.330752	0.0352279	0.971898	1	0.267554	0.330721	0.809002	0.418514	0.999669	0.255902	0.267732	0.955815	0.339166	1	no	no	no	0
FBgn0010612	l(2)06225	lethal_(2)_06225	protein_coding	2L	260	273	195	307	237	208	138	259.842	249.106	176.006	289.002	273.581	209.458	142.958	228.565	-0.0676353	0.365102	-0.18525	0.853033	1	-0.221902	0.365361	-0.60735	0.543618	0.999669	-0.154267	0.312543	-0.493586	0.621599	1	no	no	no	0
FBgn0010620	Sip1	SRY_interacting_protein_1	protein_coding	2R	431	1122	1571	1060	779	978	1114	430.738	1023.8	1417.98	997.856	899.24	984.855	1154.03	986.927	1.19667	0.267899	4.46687	7.93719e-06	0.00243215	1.02972	0.268096	3.84084	0.000122614	0.016993	-0.166956	0.20292	-0.822766	0.410641	1	yes	yes	no	0
FBgn0010621	Cct5	T-complex_Chaperonin_5	protein_coding	2R	1678	1921	1615	1476	1169	2288	1528	1676.98	1752.86	1457.69	1389.47	1349.44	2304.04	1582.9	1644.77	-0.116808	0.271036	-0.430968	0.666491	1	0.0567096	0.27105	0.209222	0.834275	0.999669	0.173518	0.207682	0.835497	0.403438	1	no	no	no	0
FBgn0010622	l(2)06496	lethal_(2)_06496	protein_coding	2R	121	120	160	127	142	205	130	120.926	109.497	144.415	119.554	163.918	206.437	134.671	142.774	-0.0120148	0.370388	-0.0324384	0.974122	1	0.336822	0.370258	0.909697	0.362982	0.999669	0.348837	0.319777	1.09088	0.275328	1	no	no	no	0
FBgn0010638	Sec61beta	Sec61_beta_subunit	protein_coding	2R	1401	1739	1869	1777	1310	1906	1527	1400.15	1586.79	1686.95	1672.82	1512.2	1919.36	1581.86	1622.88	0.214443	0.211205	1.01533	0.309949	1	0.23326	0.211306	1.1039	0.269638	0.999669	0.0188178	0.155972	0.120649	0.903969	1	no	no	no	0
FBgn0010651	l(2)08717	lethal_(2)_08717	protein_coding	2R	112	168	56	103	191	156	169	111.932	153.296	50.5453	96.9615	220.481	157.093	175.072	137.912	-0.169443	0.389628	-0.434885	0.663646	1	0.461095	0.389462	1.18393	0.236441	0.987478	0.630539	0.359859	1.75218	0.0797423	1	no	no	no	0
FBgn0010660	Nup214	Nucleoporin_214kD	protein_coding	2R	1795	1442	1899	2023	1244	1569	1372	1793.91	1315.79	1714.03	1904.4	1436.01	1580	1421.3	1595.06	-0.106817	0.234703	-0.455115	0.649027	1	-0.251967	0.234868	-1.0728	0.28336	0.999669	-0.14515	0.175952	-0.824939	0.409406	1	no	no	no	0
FBgn0010741	l(3)01239	lethal_(3)_01239	protein_coding	3L	146	187	190	163	126	220	163	145.911	170.633	171.493	153.444	145.448	221.542	168.857	168.19	0.109746	0.35899	0.305707	0.759827	1	0.20351	0.359117	0.566694	0.570922	0.999669	0.0937638	0.302965	0.309488	0.756951	1	no	no	no	0
FBgn0010747	Srp54k	Signal_recognition_particle_protein_54k	protein_coding	3L	89	65	94	92	48	153	59	88.9459	59.3109	84.8439	86.6064	55.4089	154.072	61.1199	84.3297	-0.114463	0.392532	-0.291601	0.770592	1	0.0331117	0.392541	0.084352	0.932777	0.999669	0.147574	0.38339	0.38492	0.700297	1	no	no	no	0
FBgn0010750	atms	antimeros	protein_coding	3R	482	767	580	502	453	390	625	481.707	699.868	523.505	472.57	522.922	392.734	647.456	534.394	0.185064	0.315764	0.586083	0.55782	1	0.080293	0.315966	0.254119	0.799403	0.999669	-0.104771	0.251456	-0.416657	0.676929	1	no	no	no	0
FBgn0010762	simj	simjang	protein_coding	3L	779	1004	810	577	765	642	633	778.526	916.125	731.102	543.173	883.079	646.5	655.744	736.321	-0.0738992	0.300488	-0.24593	0.805736	1	-0.0773447	0.300608	-0.257294	0.796952	0.999669	-0.00344555	0.235965	-0.0146019	0.98835	1	no	no	no	0
FBgn0010768	sqz	squeeze	protein_coding	3R	333	450	385	354	438	317	298	332.797	410.614	347.499	333.246	505.606	319.222	308.707	365.385	0.0921682	0.328895	0.280236	0.779297	1	0.139154	0.329027	0.422926	0.67235	0.999669	0.0469859	0.265754	0.176802	0.859664	1	no	no	no	0
FBgn0010770	ppan	peter_pan	protein_coding	3R	218	170	253	195	165	184	158	217.867	155.121	228.357	183.568	190.468	185.29	163.677	189.192	-0.137839	0.350499	-0.393266	0.694123	1	-0.1984	0.350811	-0.565546	0.571703	0.999669	-0.0605605	0.29253	-0.207023	0.835992	1	no	no	no	0
FBgn0010772	Xe7	Xe7	protein_coding	3R	1053	1266	1384	1127	1158	1171	1253	1052.36	1155.19	1249.19	1060.93	1336.74	1179.21	1298.02	1190.23	0.118414	0.215712	0.548948	0.583041	1	0.250747	0.215768	1.16212	0.245188	0.994308	0.132333	0.159603	0.829136	0.407027	1	no	no	no	0
FBgn0010774	Ref1	RNA_and_export_factor_binding_protein_1	protein_coding	3R	3121	4231	3642	3416	2823	3205	3895	3119.1	3860.68	3287.25	3215.73	3258.74	3227.46	4034.95	3429.13	0.135105	0.201501	0.670493	0.502543	1	0.156117	0.201553	0.774569	0.438594	0.999669	0.0210113	0.148307	0.141674	0.887337	1	no	no	no	0
FBgn0010786	l(3)02640	lethal_(3)_02640	protein_coding	3L	193	313	219	199	175	131	176	192.883	285.605	197.668	187.333	202.012	131.918	182.324	197.106	0.17129	0.361129	0.474319	0.635273	1	-0.138938	0.361592	-0.38424	0.700801	0.999669	-0.310228	0.306653	-1.01166	0.311701	1	no	no	no	0
FBgn0010803	Aats-trp	Tryptophanyl-tRNA_synthetase	protein_coding	3R	214	201	205	280	190	256	130	213.87	183.407	185.032	263.585	219.327	257.794	134.671	208.241	-0.0102564	0.366743	-0.0279661	0.977689	1	-0.048014	0.366927	-0.130854	0.895891	0.999669	-0.0377576	0.314776	-0.119951	0.904522	1	no	no	no	0
FBgn0010808	l(3)03670	lethal_(3)_03670	protein_coding	3R	949	808	902	1055	870	1263	914	948.423	737.28	814.141	993.149	1004.29	1271.85	946.84	959.424	-0.151138	0.261881	-0.577126	0.563854	1	0.167325	0.261818	0.639091	0.522764	0.999669	0.318464	0.199309	1.59784	0.110079	1	no	no	no	0
FBgn0010812	unc-45	?	protein_coding	3R	49	6	81	106	42	84	103	48.9702	5.47485	73.1102	99.7856	48.4828	84.5888	106.701	66.7305	0.022406	0.362325	0.0618396	0.950691	1	0.218152	0.362319	0.602101	0.547107	0.999669	0.195746	0.397244	0.492761	0.622182	1	no	no	no	0
FBgn0010825	Gug	Grunge	protein_coding	3L	3335	3217	3354	3595	2545	2784	2657	3332.97	2935.43	3027.3	3384.24	2937.83	2803.51	2752.47	3024.82	-0.0894587	0.173506	-0.515595	0.606137	1	-0.224006	0.173641	-1.29005	0.197032	0.962534	-0.134547	0.126516	-1.06348	0.287565	1	no	no	no	0
FBgn0010830	l(3)04053	lethal_(3)_04053	protein_coding	3L	250	225	213	222	159	292	194	249.848	205.307	192.253	208.985	183.542	294.047	200.97	219.279	-0.226466	0.348017	-0.650734	0.515218	1	-0.0891521	0.348095	-0.256114	0.797863	0.999669	0.137314	0.28912	0.474937	0.634832	1	no	no	no	0
FBgn0010877	l(3)05822	lethal_(3)_05822	protein_coding	3R	1477	1609	1233	998	1006	1534	1370	1476.1	1468.17	1112.9	939.491	1161.28	1544.75	1419.22	1303.13	-0.290885	0.266233	-1.0926	0.27457	1	-0.0780648	0.266233	-0.29322	0.769354	0.999669	0.212821	0.203443	1.04609	0.295518	1	no	no	no	0
FBgn0010894	sinu	sinuous	protein_coding	3L	269	303	586	248	266	317	297	268.836	276.48	528.921	233.461	307.058	319.222	307.671	320.235	0.255531	0.358531	0.712715	0.476022	1	0.1282	0.358723	0.357378	0.720809	0.999669	-0.127331	0.30254	-0.420874	0.673847	1	no	no	no	0
FBgn0010905	Spn	Spinophilin	protein_coding	3L	567	469	438	578	404	475	343	566.655	427.951	395.337	544.114	466.358	478.329	355.324	462.01	-0.248471	0.301023	-0.825423	0.409132	1	-0.314127	0.301273	-1.04267	0.297103	0.999669	-0.0656561	0.236994	-0.277037	0.781752	1	no	no	no	0
FBgn0010909	msn	misshapen	protein_coding	3L	5251	5939	5490	3807	4101	5512	4887	5247.81	5419.19	4955.25	3583.81	4734	5550.63	5062.59	4936.18	-0.160244	0.221608	-0.723096	0.469621	1	-0.0294761	0.221621	-0.133002	0.894192	0.999669	0.130767	0.164789	0.793545	0.42746	1	no	no	no	0
FBgn0010926	l(3)07882	lethal_(3)_07882	protein_coding	3R	302	269	425	277	181	256	226	301.816	245.456	383.603	260.761	208.938	257.794	234.12	270.355	0.00465893	0.338185	0.0137763	0.989008	1	-0.290842	0.33868	-0.858751	0.390478	0.999669	-0.295501	0.277298	-1.06565	0.286583	1	no	no	no	0
FBgn0011016	SsRbeta	Signal_sequence_receptor_beta	protein_coding	3L	1746	2080	2332	2290	1622	1849	2060	1744.94	1897.95	2104.85	2155.75	1872.36	1861.96	2134.02	1967.4	0.218548	0.194062	1.12618	0.260091	1	0.151253	0.1942	0.778852	0.436067	0.999669	-0.0672949	0.142281	-0.472971	0.636234	1	no	no	no	0
FBgn0011020	Sas-4	Spindle_assembly_abnormal_4_ortholog_(C._elegans)	protein_coding	3R	455	373	516	507	333	575	333	454.723	340.353	465.739	477.276	384.399	579.03	344.965	435.212	-0.0679781	0.326938	-0.207924	0.835288	1	-0.0432056	0.327068	-0.1321	0.894905	0.999669	0.0247725	0.263867	0.0938826	0.925202	1	no	no	no	0
FBgn0011202	dia	diaphanous	protein_coding	2L	326	154	252	240	296	181	161	325.802	140.521	227.454	225.93	341.688	182.269	166.785	230.064	-0.470771	0.373104	-1.26177	0.207032	1	-0.300257	0.37313	-0.804699	0.420993	0.999669	0.170514	0.3252	0.524336	0.600045	1	no	no	no	0
FBgn0011204	cue	cueball	protein_coding	3L	957	770	808	763	456	662	683	956.418	702.606	729.297	718.268	526.385	666.64	707.54	715.308	-0.354538	0.255638	-1.38688	0.165479	1	-0.52059	0.255977	-2.03374	0.0419777	0.659463	-0.166052	0.194709	-0.852819	0.39376	1	no	no	no	0
FBgn0011205	fbl	fumble	protein_coding	3L	377	448	507	632	776	359	612	376.771	408.789	457.616	594.948	895.777	361.516	633.989	532.772	0.22589	0.349122	0.647022	0.517618	1	0.540313	0.349082	1.54781	0.121667	0.909928	0.314424	0.289705	1.08532	0.277779	1	no	no	no	0
FBgn0011206	bol	boule	protein_coding	3L	348	554	770	597	390	405	369	347.788	505.511	694.998	562	450.197	407.839	382.258	478.656	0.642513	0.288508	2.22702	0.025946	1	0.178053	0.289142	0.615798	0.538028	0.999669	-0.464461	0.223423	-2.07884	0.0376317	1	no	no	no	0
FBgn0011207	pelo	pelota	protein_coding	2L	232	469	342	392	210	488	330	231.859	427.951	308.688	369.018	242.414	491.42	341.857	344.744	0.465404	0.34726	1.34022	0.180174	1	0.432295	0.347415	1.24432	0.213382	0.973953	-0.033109	0.287095	-0.115324	0.908188	1	no	no	no	0
FBgn0011211	blw	bellwether	protein_coding	2R	8887	9773	9940	10473	8345	10830	8327	8881.59	8917.62	8971.8	9859.01	9633.07	10905.9	8626.19	9399.31	0.0539804	0.173516	0.311097	0.755727	1	0.124003	0.173534	0.714577	0.47487	0.999669	0.0700228	0.126328	0.554292	0.579379	1	no	no	no	0
FBgn0011217	eff	effete	protein_coding	3R	10077	10144	11273	9398	8194	8397	8676	10070.9	9256.15	10175	8847.03	9458.76	8455.86	8987.73	9321.62	-0.0900314	0.156932	-0.573695	0.566174	1	-0.160551	0.156973	-1.02279	0.306406	0.999669	-0.0705198	0.113682	-0.620325	0.535044	1	no	no	no	0
FBgn0011224	heph	hephaestus	protein_coding	3R	3237	2331	5101	3208	1514	3038	1733	3235.03	2126.98	4604.14	3019.93	1747.69	3059.29	1795.27	2798.33	0.0371552	0.316285	0.117474	0.906485	1	-0.461707	0.316376	-1.45936	0.144466	0.924298	-0.498862	0.252229	-1.97781	0.0479497	1	no	no	no	0
FBgn0011225	jar	jaguar	protein_coding	3R	247	199	319	236	270	232	96	246.85	181.583	287.928	222.164	311.675	233.626	99.4493	226.182	-0.0469487	0.383355	-0.122468	0.902528	1	-0.12373	0.383466	-0.322662	0.746951	0.999669	-0.0767812	0.344203	-0.22307	0.823481	1	no	no	no	0
FBgn0011227	ox	oxen	protein_coding	2R	32	23	49	30	12	74	23	31.9805	20.9869	44.2272	28.2412	13.8522	74.5187	23.8264	33.9476	-0.0343502	0.358514	-0.0958128	0.923669	1	0.0819369	0.358448	0.228588	0.819189	0.999669	0.116287	0.395945	0.293695	0.768991	1	no	no	no	0
FBgn0011230	poe	purity_of_essence	protein_coding	2L	2317	2115	2200	2422	1836	1884	2024	2315.59	1929.88	1985.71	2280.01	2119.39	1897.21	2096.72	2089.22	-0.152713	0.193579	-0.788893	0.430174	1	-0.171409	0.193691	-0.88496	0.376178	0.999669	-0.0186953	0.14226	-0.131416	0.895446	1	no	no	no	0
FBgn0011232	scat	scattered	protein_coding	2L	125	193	143	64	162	87	193	124.924	176.108	129.071	60.2479	187.005	87.6098	199.934	137.843	-0.0560592	0.392235	-0.142922	0.886352	1	0.2016	0.392225	0.513992	0.607258	0.999669	0.25766	0.371429	0.693698	0.487871	1	no	no	no	0
FBgn0011236	ken	ken_and_barbie	protein_coding	2R	904	1613	1153	1301	963	1209	1340	903.45	1471.82	1040.69	1224.73	1111.64	1217.47	1388.15	1193.99	0.403772	0.249128	1.62074	0.105072	1	0.39662	0.249242	1.59131	0.111541	0.903259	-0.00715222	0.187603	-0.0381242	0.969589	1	no	no	no	0
FBgn0011239	ms(2)35Ci	male_sterile_(2)_35Ci	protein_coding	2L	0	0	0	0	0	0	0	?	?	?	?	?	?	?	?	?	?	?	?	?	?	?	?	?	?	?	?	?	?	?	no	no	no	#VALUE!
FBgn0011241	cbx	crossbronx	protein_coding	2R	81	104	76	89	48	81	140	80.9507	94.8974	68.5972	83.7823	55.4089	81.5677	145.03	87.1763	-0.00787848	0.392612	-0.0200668	0.98399	1	0.120543	0.392638	0.307008	0.758838	0.999669	0.128421	0.374833	0.342609	0.731893	1	no	no	no	0
FBgn0011244	Hsp60B	Heat_shock_protein_60_related	protein_coding	2L	0	0	0	0	0	0	0	?	?	?	?	?	?	?	?	?	?	?	?	?	?	?	?	?	?	?	?	?	?	?	no	no	no	#VALUE!
FBgn0011259	Sema-1a	Sema-1a	protein_coding	2L	1680	1550	1418	1290	1154	1185	1350	1678.98	1414.34	1279.88	1214.37	1332.12	1193.31	1398.51	1358.79	-0.333926	0.211215	-1.58098	0.113883	1	-0.328595	0.211352	-1.55473	0.120011	0.909928	0.00533151	0.156698	0.0340241	0.972858	1	no	no	no	0
FBgn0011260	Sema-2a	Sema-2a	protein_coding	2R	4755	4410	4851	4289	2749	3653	3703	4752.11	4024.01	4378.49	4037.55	3173.31	3678.6	3836.05	3982.88	-0.181146	0.176828	-1.02442	0.305637	1	-0.394109	0.176953	-2.22719	0.0259343	0.541066	-0.212962	0.129133	-1.64917	0.0991126	1	no	no	no	0
FBgn0011270	Pglym87	Pglym87	protein_coding	3R	0	0	0	0	0	0	0	?	?	?	?	?	?	?	?	?	?	?	?	?	?	?	?	?	?	?	?	?	?	?	no	no	no	#VALUE!
FBgn0011272	RpL13	Ribosomal_protein_L13	protein_coding	2L	24095	25507	30292	29819	24889	26180	32291	24080.3	23274.5	27341.4	28070.8	28730.7	26363.5	33451.2	27330.4	0.112652	0.179332	0.628175	0.529889	1	0.278253	0.179333	1.5516	0.120758	0.909928	0.165602	0.130846	1.26562	0.205649	1	no	no	no	0
FBgn0011273	Acam	Androcam	protein_coding	3R	0	0	0	0	0	0	0	?	?	?	?	?	?	?	?	?	?	?	?	?	?	?	?	?	?	?	?	?	?	?	no	no	no	#VALUE!
FBgn0011274	Dif	Dorsal-related_immunity_factor	protein_coding	2L	126	346	153	542	350	142	331	125.923	315.716	138.097	510.225	404.023	142.995	342.893	282.839	0.639472	0.390579	1.63724	0.10158	1	0.55615	0.390626	1.42374	0.154521	0.934262	-0.0833218	0.36355	-0.22919	0.818722	1	no	no	no	0
FBgn0011276	HLH3B	Helix_loop_helix_protein_3B	protein_coding	X	0	0	0	0	0	0	0	?	?	?	?	?	?	?	?	?	?	?	?	?	?	?	?	?	?	?	?	?	?	?	no	no	no	#VALUE!
FBgn0011277	HLH4C	Helix_loop_helix_protein_4C	protein_coding	X	0	0	0	0	0	0	0	?	?	?	?	?	?	?	?	?	?	?	?	?	?	?	?	?	?	?	?	?	?	?	no	no	no	#VALUE!
FBgn0011278	lbe	ladybird_early	protein_coding	3R	0	0	0	0	0	0	0	?	?	?	?	?	?	?	?	?	?	?	?	?	?	?	?	?	?	?	?	?	?	?	no	no	no	#VALUE!
FBgn0011279	Obp69a	Odorant-binding_protein_69a	protein_coding	3L	0	0	0	0	0	0	0	?	?	?	?	?	?	?	?	?	?	?	?	?	?	?	?	?	?	?	?	?	?	?	no	no	no	#VALUE!
FBgn0011280	Obp19d	Odorant-binding_protein_19d	protein_coding	X	18	5	14	5	3	9	0	17.9891	4.56237	12.6363	4.70687	3.46306	9.06308	0	7.48868	-0.127628	0.242751	-0.525757	0.599057	1	-0.239199	0.242279	-0.987284	0.323504	NA	-0.11157	0.301396	-0.370179	0.711249	NA	no	no	no	0
FBgn0011281	Obp83a	Odorant-binding_protein_83a	protein_coding	3R	0	0	0	0	0	0	0	?	?	?	?	?	?	?	?	?	?	?	?	?	?	?	?	?	?	?	?	?	?	?	no	no	no	#VALUE!
FBgn0011282	Obp84a	Odorant-binding_protein_84a	protein_coding	3R	0	0	0	0	0	0	0	?	?	?	?	?	?	?	?	?	?	?	?	?	?	?	?	?	?	?	?	?	?	?	no	no	no	#VALUE!
FBgn0011283	Obp28a	Odorant-binding_protein_28a	protein_coding	2L	0	0	0	0	0	0	0	?	?	?	?	?	?	?	?	?	?	?	?	?	?	?	?	?	?	?	?	?	?	?	no	no	no	#VALUE!
FBgn0011284	RpS4	Ribosomal_protein_S4	protein_coding	3L	46060	51443	58890	64778	59017	50004	60933	46032	46940.4	53153.8	60980.3	68126.4	50354.5	63122.3	55530	0.201266	0.197704	1.01802	0.30867	1	0.368396	0.197705	1.86336	0.0624112	0.77702	0.16713	0.145334	1.14997	0.250156	1	no	no	no	0
FBgn0011286	RyR	Ryanodine_receptor	protein_coding	2R	9	44	16	39	44	15	30	8.99453	40.1489	14.4415	36.7136	50.7915	15.1051	31.0779	28.1819	0.309319	0.357165	0.866038	0.386469	1	0.347726	0.357026	0.973952	0.33008	0.999669	0.0384067	0.395714	0.0970569	0.922681	1	no	no	no	0
FBgn0011288	Snap25	Synaptosomal-associated_protein_25kDa	protein_coding	3L	0	7	0	13	0	0	37	0	6.38732	0	12.2379	0	0	38.3294	8.13637	0.0158789	0.167143	0.0950019	0.924313	1	0.107653	0.16709	0.644282	0.519392	NA	0.0917742	0.215355	0.426154	0.669996	NA	no	no	no	0
FBgn0011289	TfIIA-L	Transcription_factor_IIA_L	protein_coding	3R	513	562	610	539	493	675	413	512.688	512.811	550.583	507.4	569.096	679.731	427.839	537.164	0.019994	0.293828	0.0680467	0.945748	1	0.105623	0.29393	0.359348	0.719335	0.999669	0.0856292	0.229142	0.373695	0.708631	1	no	no	no	0
FBgn0011290	Taf12	TBP-associated_factor_12	protein_coding	3R	1902	2969	2411	2335	2225	2178	2197	1900.84	2709.14	2176.16	2198.11	2568.43	2193.27	2275.94	2288.84	0.286562	0.20659	1.3871	0.16541	1	0.277394	0.206675	1.34217	0.17954	0.949948	-0.00916849	0.152244	-0.0602222	0.951979	1	no	no	no	0
FBgn0011291	Taf11	TBP-associated_factor_11	protein_coding	2L	28	30	39	9	21	48	0	27.983	27.3742	35.2012	8.47236	24.2414	48.3364	0	24.5155	-0.0340144	0.289674	-0.117423	0.906525	1	-0.0262192	0.289534	-0.0905568	0.927845	0.999669	0.0077952	0.348385	0.0223752	0.982149	1	no	no	no	0
FBgn0011293	a10	antennal_protein_10	protein_coding	3L	0	0	0	0	0	0	0	?	?	?	?	?	?	?	?	?	?	?	?	?	?	?	?	?	?	?	?	?	?	?	no	no	no	#VALUE!
FBgn0011294	a5	antennal_protein_5	protein_coding	2L	0	0	0	0	0	0	0	?	?	?	?	?	?	?	?	?	?	?	?	?	?	?	?	?	?	?	?	?	?	?	no	no	no	#VALUE!
FBgn0011296	l(2)efl	lethal_(2)_essential_for_life	protein_coding	2R	1007	131	80	238	249	516	625	1006.39	119.534	72.2076	224.047	287.434	519.617	647.456	410.955	-1.90586	0.379117	-5.02709	4.97981e-07	0.000201423	-0.547451	0.37869	-1.44565	0.148276	0.932181	1.3584	0.335787	4.04544	5.22257e-05	0.0281944	yes	no	yes	0
FBgn0011297	l(2)not	lethal_(2)_neighbor_of_tid	protein_coding	2R	301	238	196	221	169	151	224	300.817	217.169	176.909	208.044	195.086	152.058	232.048	211.733	-0.413092	0.346623	-1.19176	0.233354	1	-0.460233	0.346917	-1.32664	0.184629	0.950765	-0.0471402	0.288137	-0.163603	0.870043	1	no	no	no	0
FBgn0011300	babo	baboon	protein_coding	2R	2327	2932	3022	2685	2420	2288	1957	2325.58	2675.38	2727.64	2527.59	2793.53	2304.04	2027.31	2483.01	0.172411	0.210365	0.819581	0.412455	1	0.0236998	0.21049	0.112593	0.910353	0.999669	-0.148711	0.155509	-0.956285	0.338928	1	no	no	no	0
FBgn0011305	Rsf1	Repressor_splicing_factor_1	protein_coding	2L	1489	1316	1801	1606	953	2048	1312	1488.09	1200.82	1625.57	1511.85	1100.1	2062.35	1359.14	1478.27	-0.0366118	0.290459	-0.126048	0.899694	1	0.0181473	0.290507	0.0624674	0.950191	0.999669	0.0547591	0.225973	0.242325	0.808528	1	no	no	no	0
FBgn0011327	Uch-L5	Ubiquitin_carboxy-terminal_hydrolase_L5_ortholog	protein_coding	3L	63	67	49	73	46	63	73	62.9617	61.1358	44.2272	68.7203	53.1002	63.4416	75.6229	61.3157	-0.068642	0.392788	-0.174756	0.861271	1	0.0263448	0.392831	0.0670639	0.946531	0.999669	0.0949868	0.377566	0.251576	0.801368	1	no	no	no	0
FBgn0011335	l(3)j2D3	lethal_(3)_j2D3	protein_coding	3L	48	20	60	35	45	71	13	47.9708	18.2495	54.1557	32.9481	51.9459	71.4976	13.4671	41.4621	-0.158092	0.365793	-0.43219	0.665603	1	0.0146649	0.365771	0.0400931	0.968019	0.999669	0.172757	0.398112	0.433941	0.664331	1	no	no	no	0
FBgn0011336	OstStt3	Oligosaccharyl_transferase_3	protein_coding	3R	658	797	763	697	507	842	567	657.6	727.243	688.68	656.137	585.257	847.902	587.372	678.599	0.060668	0.278533	0.217812	0.827575	1	0.0275367	0.278714	0.0987992	0.921298	0.999669	-0.0331314	0.214601	-0.154386	0.877305	1	no	no	no	0
FBgn0011361	mtacp1	mitochondrial_acyl_carrier_protein_1	protein_coding	3L	154	232	288	308	146	143	186	153.906	211.694	259.947	289.943	168.535	144.002	192.683	202.959	0.547653	0.347457	1.57617	0.114986	1	0.0450397	0.348243	0.129334	0.897093	0.999669	-0.502613	0.28777	-1.74658	0.0807103	1	no	no	no	0
FBgn0011455	l(3)neo18	lethal_(3)_neo18	protein_coding	3L	1100	1113	1652	967	993	1252	1262	1099.33	1015.58	1491.09	910.308	1146.27	1260.78	1307.34	1175.81	0.038279	0.270891	0.141308	0.887627	1	0.149926	0.270937	0.553361	0.580017	0.999669	0.111647	0.20744	0.538212	0.590431	1	no	no	no	0
FBgn0011474	pr-set7	pr-set7	protein_coding	3R	3075	3335	3038	2867	2703	2619	2711	3073.13	3043.1	2742.08	2698.92	3120.21	2637.36	2808.41	2874.74	-0.112308	0.183745	-0.611219	0.541054	1	-0.0990224	0.18382	-0.538692	0.590099	0.999669	0.013286	0.134417	0.0988421	0.921264	1	no	no	no	0
FBgn0011476	l(3)neo43	lethal_(3)_neo43	protein_coding	3R	17	7	16	11	2	70	0	16.9897	6.38732	14.4415	10.3551	2.3087	70.4906	0	17.2819	-0.113845	0.253546	-0.449011	NA	NA	0.111797	0.253554	0.440918	NA	NA	0.225642	0.313398	0.719985	NA	NA	no	no	no	0
FBgn0011481	Ssdp	Sequence-specific_single-stranded_DNA-binding_protein	protein_coding	3R	2829	3186	3064	2760	1773	2749	2332	2827.28	2907.15	2765.55	2598.19	2046.67	2768.27	2415.79	2618.41	-0.0288081	0.206521	-0.139492	0.889061	1	-0.215118	0.20666	-1.04093	0.297909	0.999669	-0.18631	0.152568	-1.22116	0.222027	1	no	no	no	0
FBgn0011509	SrpRbeta	Signal_recognition_particle_receptor_beta	protein_coding	3L	379	235	609	274	174	243	263	378.769	214.432	549.68	257.936	200.857	244.703	272.45	302.69	-0.055794	0.371299	-0.150267	0.880554	1	-0.459138	0.371586	-1.23562	0.216601	0.973953	-0.403344	0.32227	-1.25157	0.210726	1	no	no	no	0
FBgn0011554	etaTry	etaTrypsin	protein_coding	2R	0	0	0	1	0	0	0	?	?	?	?	?	?	?	?	?	?	?	?	?	?	?	?	?	?	?	?	?	?	?	no	no	no	#VALUE!
FBgn0011555	thetaTry	thetaTrypsin	protein_coding	2R	0	0	0	0	0	0	0	?	?	?	?	?	?	?	?	?	?	?	?	?	?	?	?	?	?	?	?	?	?	?	no	no	no	#VALUE!
FBgn0011556	zetaTry	zetaTrypsin	protein_coding	2R	0	0	0	0	0	0	0	?	?	?	?	?	?	?	?	?	?	?	?	?	?	?	?	?	?	?	?	?	?	?	no	no	no	#VALUE!
FBgn0011559	Acp36DE	Accessory_gland_protein_36DE	protein_coding	2L	0	15	0	0	0	0	0	0	13.6871	0	0	0	0	0	1.9553	0.10445	0.122571	0.852162	NA	NA	0	0.122301	0	NA	NA	-0.146041	0.159803	-0.913879	NA	NA	no	no	no	0
FBgn0011566	Bzd	Buzidau	protein_coding	X	152	101	103	164	99	111	169	151.908	92.16	92.9673	154.385	114.281	111.778	175.072	127.507	-0.265011	0.383609	-0.690837	0.489668	1	-0.0841858	0.383631	-0.219444	0.826304	0.999669	0.180826	0.344811	0.52442	0.599987	1	no	no	no	0
FBgn0011569	can	cannonball	protein_coding	3L	0	0	0	0	0	0	0	?	?	?	?	?	?	?	?	?	?	?	?	?	?	?	?	?	?	?	?	?	?	?	no	no	no	#VALUE!
FBgn0011570	cpb	capping_protein_beta	protein_coding	2L	1342	1387	1208	1077	964	1051	985	1341.18	1265.6	1090.33	1013.86	1112.8	1058.37	1020.39	1128.93	-0.228435	0.222809	-1.02525	0.305246	1	-0.303392	0.223016	-1.36041	0.173702	0.949948	-0.0749578	0.16621	-0.450982	0.652002	1	no	no	no	0
FBgn0011571	caz	cabeza	protein_coding	X	126	144	146	97	78	199	255	125.923	131.396	131.779	91.3133	90.0395	200.395	264.162	147.858	-0.112257	0.388794	-0.28873	0.772788	1	0.356405	0.388693	0.916933	0.359178	0.999669	0.468662	0.357368	1.31143	0.189714	1	no	no	no	0
FBgn0011573	Cdc37	Cdc37	protein_coding	3L	285	247	259	216	288	236	352	284.827	225.381	233.772	203.337	332.453	237.654	364.647	268.867	-0.302768	0.332897	-0.909492	0.36309	1	0.127622	0.332669	0.38363	0.701253	0.999669	0.430389	0.270539	1.59086	0.111642	1	no	no	no	0
FBgn0011576	Cyp4d2	Cytochrome_P450-4d2	protein_coding	X	58	45	34	20	51	22	21	57.9647	41.0614	30.6882	18.8275	58.872	22.1542	21.7545	35.9032	-0.314915	0.372233	-0.846015	0.397544	1	-0.230322	0.372158	-0.618883	0.535993	0.999669	0.0845926	0.399114	0.211951	0.832145	1	no	no	no	0
FBgn0011581	Ms	Myosuppressin	protein_coding	3R	0	22	0	12	0	0	0	0	20.0744	0	11.2965	0	0	0	4.48156	0.141295	0.141028	1.0019	0.316393	1	0	0.140819	0	1	NA	-0.19764	0.183057	-1.07966	0.280294	NA	no	no	no	0
FBgn0011582	Dop1R1	Dopamine_1-like_receptor_1	protein_coding	3R	0	0	4	0	0	0	0	0	0	3.61038	0	0	0	0	0.515769	0.0883657	0.115816	0.762986	0.445472	NA	0	0.115302	0	1	NA	-0.121339	0.151362	-0.801648	0.422757	NA	no	no	no	0
FBgn0011584	Trp1	Translocation_protein_1	protein_coding	2L	251	213	247	360	277	250	247	250.847	194.357	222.941	338.895	319.756	251.752	255.875	262.06	-0.00480752	0.348694	-0.0137872	0.989	1	0.104642	0.348781	0.300021	0.764161	0.999669	0.109449	0.289538	0.378014	0.70542	1	no	no	no	0
FBgn0011586	e(r)	enhancer_of_rudimentary	protein_coding	X	442	431	615	480	337	432	469	441.731	393.277	555.096	451.859	389.017	435.028	485.851	450.266	0.0689675	0.296724	0.23243	0.816204	1	-0.0180777	0.297003	-0.0608671	0.951465	0.999669	-0.0870452	0.23215	-0.374952	0.707696	1	no	no	no	0
FBgn0011589	Elk	Eag-like_K[+]_channel	protein_coding	2R	14	23	0	0	7	56	10	13.9915	20.9869	0	0	8.08047	56.3925	10.3593	15.6872	-0.128689	0.23435	-0.549134	0.582913	1	0.146355	0.234388	0.624413	0.532356	0.999669	0.275044	0.293079	0.938463	0.348007	NA	no	no	no	0
FBgn0011591	fng	fringe	protein_coding	3L	1052	981	871	1044	718	919	829	1051.36	895.138	786.16	982.794	828.825	925.441	858.786	904.072	-0.215753	0.235103	-0.917696	0.358778	1	-0.241946	0.235297	-1.02826	0.303828	0.999669	-0.0261934	0.176498	-0.148406	0.882023	1	no	no	no	0
FBgn0011592	fra	frazzled	protein_coding	2R	2389	2346	2680	2309	2003	2404	2318	2387.55	2140.67	2418.95	2173.63	2312.17	2420.85	2401.29	2322.16	-0.0851184	0.178154	-0.477781	0.632806	1	-0.00389293	0.178217	-0.0218437	0.982573	0.999669	0.0812254	0.130005	0.624785	0.532112	1	no	no	no	0
FBgn0011596	fzo	fuzzy_onions	protein_coding	3R	0	0	0	0	0	0	0	?	?	?	?	?	?	?	?	?	?	?	?	?	?	?	?	?	?	?	?	?	?	?	no	no	no	#VALUE!
FBgn0011603	ine	inebriated	protein_coding	2L	0	0	0	11	45	15	0	0	0	0	10.3551	51.9459	15.1051	0	11.058	-0.0474471	0.184887	-0.256628	0.797466	1	0.202869	0.184903	1.09716	0.27257	NA	0.250316	0.236732	1.05738	0.290336	NA	no	no	no	0
FBgn0011604	Iswi	Imitation_SWI	protein_coding	2R	882	867	782	756	589	867	946	881.464	791.116	705.829	711.679	679.913	873.077	979.99	803.295	-0.230212	0.261967	-0.878782	0.379519	1	-0.045419	0.261988	-0.173363	0.862366	0.999669	0.184793	0.199645	0.925609	0.354649	1	no	no	no	0
FBgn0011606	Klp3A	Kinesin-like_protein_at_3A	protein_coding	X	380	364	463	400	290	365	418	379.769	332.141	417.902	376.549	334.762	367.558	433.019	377.386	-0.0135261	0.300614	-0.044995	0.964111	1	-0.00317309	0.300831	-0.0105478	0.991584	0.999822	0.010353	0.236053	0.0438589	0.965017	1	no	no	no	0
FBgn0011638	La	La_autoantigen-like	protein_coding	2L	476	317	538	471	216	376	572	475.71	289.255	485.596	443.387	249.34	378.635	592.552	416.354	-0.154049	0.358852	-0.429284	0.667717	1	-0.151344	0.358945	-0.421635	0.673291	0.999669	0.00270528	0.303332	0.00891855	0.992884	1	no	no	no	0
FBgn0011640	lark	lark	protein_coding	3L	3918	3766	3978	4276	3261	3562	3869	3915.62	3436.38	3590.52	4025.31	3764.34	3586.97	4008.01	3761.02	-0.0834716	0.174235	-0.479076	0.631885	1	-0.0449342	0.174288	-0.257815	0.79655	0.999669	0.0385374	0.126961	0.303538	0.76148	1	no	no	no	0
FBgn0011642	Zyx	Zyxin	protein_coding	4	1615	1441	1770	1471	1464	1635	1499	1614.02	1314.88	1597.59	1384.76	1689.97	1646.46	1552.86	1542.93	-0.162095	0.205593	-0.788425	0.430448	1	0.0170282	0.205614	0.0828165	0.933997	0.999669	0.179123	0.151756	1.18034	0.237867	1	no	no	no	0
FBgn0011648	Mad	Mothers_against_dpp	protein_coding	2L	625	449	562	684	447	565	473	624.62	409.701	507.258	643.9	515.995	568.96	489.995	537.204	-0.214911	0.294446	-0.729883	0.465462	1	-0.202893	0.294611	-0.688682	0.491023	0.999669	0.0120182	0.23026	0.0521939	0.958374	1	no	no	no	0
FBgn0011653	mas	masquerade	protein_coding	3L	0	58	251	25	1	55	35	0	52.9235	226.551	23.5343	1.15435	55.3855	36.2575	56.5438	0.659249	0.32306	2.04064	0.0412868	1	0.0526212	0.322721	0.163055	0.870475	0.999669	-0.606628	0.375902	-1.61379	0.106573	1	no	no	no	0
FBgn0011655	Med	Medea	protein_coding	3R	1255	1315	1193	1357	1183	931	1375	1254.24	1199.9	1076.8	1277.44	1365.6	937.525	1424.4	1219.42	-0.0733816	0.259088	-0.28323	0.777001	1	-0.00931182	0.259161	-0.0359306	0.971338	0.999669	0.0640698	0.196935	0.325334	0.744928	1	no	no	no	0
FBgn0011656	Mef2	Myocyte_enhancer_factor_2	protein_coding	2R	1311	907	1017	770	890	793	476	1310.2	827.615	917.939	724.858	1027.37	798.558	493.103	871.378	-0.523184	0.311236	-1.68099	0.0927647	1	-0.604787	0.311367	-1.94236	0.0520936	0.728177	-0.0816024	0.247336	-0.329925	0.741457	1	no	no	no	0
FBgn0011659	Mlh1	Mlh1	protein_coding	2R	308	223	292	311	207	244	411	307.813	203.482	263.558	292.767	238.951	245.71	425.767	282.578	-0.212452	0.353949	-0.600234	0.54835	1	0.0055148	0.353946	0.0155809	0.987569	0.999822	0.217967	0.296596	0.734896	0.462403	1	no	no	no	0
FBgn0011660	Pms2	Pms2	protein_coding	2R	557	426	596	496	433	500	462	556.661	388.714	537.947	466.921	499.835	503.505	478.6	490.312	-0.22092	0.281407	-0.785055	0.432421	1	-0.13946	0.28154	-0.495347	0.620355	0.999669	0.08146	0.217724	0.374143	0.708298	1	no	no	no	0
FBgn0011661	Moe	Moesin	protein_coding	X	2054	2090	2303	1692	1791	1824	1842	2052.75	1907.07	2078.68	1592.8	2067.44	1836.78	1908.18	1920.53	-0.131486	0.210609	-0.624312	0.532423	1	-0.0747763	0.210681	-0.354927	0.722644	0.999669	0.0567096	0.155854	0.363865	0.715959	1	no	no	no	0
FBgn0011666	msi	musashi	protein_coding	3R	3367	3060	3601	3081	2466	2828	2451	3364.95	2792.17	3250.24	2900.37	2846.63	2847.82	2539.06	2934.47	-0.161594	0.181536	-0.89015	0.373385	1	-0.27746	0.18166	-1.52736	0.126673	0.909928	-0.115866	0.132797	-0.872501	0.382935	1	no	no	no	0
FBgn0011668	Mst57Da	Male-specific_RNA_57Da	protein_coding	3R	8	0	0	0	0	0	0	7.99513	0	0	0	0	0	0	1.14216	-0.181581	0.120533	-1.50649	0.131941	1	-0.18079	0.120254	-1.5034	0.132735	NA	0	0.156805	0	1	NA	no	no	no	0
FBgn0011669	Mst57Db	Male-specific_RNA_57Db	protein_coding	3R	0	0	0	0	0	0	0	?	?	?	?	?	?	?	?	?	?	?	?	?	?	?	?	?	?	?	?	?	?	?	no	no	no	#VALUE!
FBgn0011670	Mst57Dc	Male-specific_transcript_57Dc	protein_coding	3R	0	0	0	0	0	0	0	?	?	?	?	?	?	?	?	?	?	?	?	?	?	?	?	?	?	?	?	?	?	?	no	no	no	#VALUE!
FBgn0011672	Mvl	Malvolio	protein_coding	3R	454	311	412	194	397	330	316	453.724	283.78	371.869	182.627	458.278	332.313	327.354	344.278	-0.521587	0.348784	-1.49544	0.134799	1	-0.172751	0.348694	-0.495423	0.620302	0.999669	0.348836	0.290127	1.20236	0.229225	1	no	no	no	0
FBgn0011674	insc	inscuteable	protein_coding	2R	49	56	65	77	50	36	93	48.9702	51.0986	58.6687	72.4858	57.7176	36.2523	96.3415	60.2192	0.114673	0.391045	0.293247	0.769334	1	0.153229	0.391053	0.391836	0.695179	0.999669	0.0385561	0.388753	0.0991789	0.920996	1	no	no	no	0
FBgn0011676	Nos	Nitric_oxide_synthase	protein_coding	2L	7	0	0	0	0	1	0	6.99574	0	0	0	0	1.00701	0	1.14325	-0.16278	0.12062	-1.34953	0.177165	1	-0.142826	0.120373	-1.18653	0.235414	NA	0.0199544	0.157003	0.127096	0.898865	NA	no	no	no	0
FBgn0011692	pav	pavarotti	protein_coding	3L	2338	2679	2361	2387	1864	2395	2784	2336.58	2444.52	2131.03	2247.06	2151.71	2411.79	2884.03	2372.39	-0.0386646	0.21049	-0.183688	0.854258	1	0.0829239	0.210524	0.393893	0.69366	0.999669	0.121588	0.155625	0.781293	0.43463	1	no	no	no	0
FBgn0011693	Pdh	Photoreceptor_dehydrogenase	protein_coding	3L	0	0	0	0	0	0	0	?	?	?	?	?	?	?	?	?	?	?	?	?	?	?	?	?	?	?	?	?	?	?	no	no	no	#VALUE!
FBgn0011694	PebII	Protein_ejaculatory_bulb_II	protein_coding	2R	0	0	0	0	0	0	0	?	?	?	?	?	?	?	?	?	?	?	?	?	?	?	?	?	?	?	?	?	?	?	no	no	no	#VALUE!
FBgn0011695	PebIII	Ejaculatory_bulb_protein_III	protein_coding	2R	5	16	22	28	5	7	0	4.99696	14.5996	19.8571	26.3585	5.77176	7.04906	0	11.2333	0.353473	0.276692	1.27749	0.201428	1	-0.14699	0.275662	-0.533226	0.593877	NA	-0.500463	0.336104	-1.48901	0.136485	NA	no	no	no	0
FBgn0011701	repo	reversed_polarity	protein_coding	3R	0	5	5	3	0	0	0	0	4.56237	4.51298	2.82412	0	0	0	1.69992	0.103609	0.122151	0.848206	0.396323	1	0	0.121846	0	1	NA	-0.14484	0.159255	-0.909485	0.363094	NA	no	no	no	0
FBgn0011703	RnrL	Ribonucleoside_diphosphate_reductase_large_subunit	protein_coding	2L	1917	2294	2320	2294	1767	1885	1954	1915.83	2093.22	2094.02	2159.51	2039.74	1898.21	2024.21	2032.11	0.13599	0.17631	0.771311	0.440523	1	0.0481268	0.176476	0.272709	0.785077	0.999669	-0.0878632	0.128457	-0.683988	0.493983	1	no	no	no	0
FBgn0011704	RnrS	Ribonucleoside_diphosphate_reductase_small_subunit	protein_coding	2R	4355	4134	4587	4011	3283	3522	4417	4352.35	3772.17	4140.2	3775.85	3789.74	3546.69	4575.7	3993.24	-0.149009	0.190641	-0.781622	0.434436	1	-0.122493	0.190689	-0.64237	0.520633	0.999669	0.0265163	0.139823	0.189642	0.84959	1	no	no	no	0
FBgn0011705	rost	rolling_stone	protein_coding	2L	4	49	35	4	8	15	1	3.99757	44.7113	31.5908	3.76549	9.23482	15.1051	1.03593	15.6344	0.388984	0.288893	1.34646	0.178154	1	-0.0486826	0.28816	-0.168943	0.865842	0.999669	-0.437666	0.347726	-1.25865	0.208156	NA	no	no	no	0
FBgn0011706	rpr	reaper	protein_coding	3L	122	264	161	127	132	217	329	121.926	240.893	145.318	119.554	152.374	218.521	340.821	191.344	0.203945	0.383225	0.532182	0.5946	1	0.579236	0.383153	1.51176	0.130595	0.914119	0.375291	0.343239	1.09338	0.274227	1	no	no	no	0
FBgn0011708	Syx5	Syntaxin_5	protein_coding	2L	423	652	625	589	595	495	466	422.743	594.934	564.122	554.469	686.84	498.469	482.743	543.474	0.358793	0.28495	1.25915	0.207978	1	0.322508	0.285159	1.13097	0.258066	0.999669	-0.0362856	0.22001	-0.164927	0.869001	1	no	no	no	0
FBgn0011710	Sep1	Septin_1	protein_coding	X	1554	1277	1247	1428	855	1317	1135	1553.05	1165.23	1125.54	1344.28	986.971	1326.23	1175.78	1239.58	-0.316385	0.235988	-1.34068	0.180024	1	-0.372031	0.236148	-1.57541	0.115161	0.909928	-0.0556463	0.177265	-0.313916	0.753585	1	no	no	no	0
FBgn0011715	Snr1	Snf5-related_1	protein_coding	3R	719	682	673	802	675	740	599	718.563	622.308	607.446	754.982	779.188	745.187	620.522	692.599	-0.106456	0.262361	-0.405761	0.684918	1	-0.00209889	0.262452	-0.00799726	0.993619	0.999822	0.104357	0.199912	0.522013	0.601662	1	no	no	no	0
FBgn0011722	Tig	Tiggrin	protein_coding	2L	48	221	146	143	309	76	253	47.9708	201.657	131.779	134.616	356.695	76.5327	262.09	173.049	0.58635	0.392373	1.49437	0.13508	1	0.982572	0.392344	2.50436	0.0122672	0.374826	0.396222	0.373384	1.06116	0.288615	1	no	no	no	0
FBgn0011723	byn	brachyenteron	protein_coding	3L	0	0	0	0	0	13	0	0	0	0	0	0	13.0911	0	1.87016	0	0.122323	0	1	1	0.104673	0.122271	0.856075	0.391956	NA	0.146652	0.159644	0.918617	0.358296	NA	no	no	no	0
FBgn0011725	twin	twin	protein_coding	3R	2722	3221	3299	3176	2514	2845	2845	2720.34	2939.08	2977.66	2989.8	2902.04	2864.94	2947.22	2905.87	0.120392	0.159663	0.754038	0.450826	1	0.0895635	0.159771	0.560574	0.575088	0.999669	-0.0308288	0.115638	-0.266597	0.78978	1	no	no	no	0
FBgn0011726	tsr	twinstar	protein_coding	2R	832	780	1002	797	539	1039	879	831.494	711.73	904.4	750.275	622.196	1046.28	910.582	825.28	-0.0680783	0.289609	-0.23507	0.814154	1	0.0456738	0.289663	0.157679	0.87471	0.999669	0.113752	0.225153	0.505222	0.613403	1	no	no	no	0
FBgn0011737	Wee1	Wee1_ortholog_(S._pombe)	protein_coding	2L	329	337	385	225	162	242	274	328.8	307.504	347.499	211.809	187.005	243.696	283.845	272.88	-0.11287	0.346774	-0.325485	0.744814	1	-0.347901	0.347156	-1.00215	0.316273	0.999669	-0.235032	0.287844	-0.816526	0.4142	1	no	no	no	0
FBgn0011739	wts	warts	protein_coding	3R	913	868	795	644	599	780	625	912.445	792.028	717.563	606.245	691.457	785.467	647.456	736.094	-0.320939	0.257896	-1.24445	0.213333	1	-0.315426	0.25807	-1.22225	0.221613	0.979286	0.00551321	0.196404	0.0280708	0.977606	1	no	no	no	0
FBgn0011740	alpha-Man-II	alpha_Mannosidase_II	protein_coding	3R	381	438	355	402	252	311	339	380.768	399.664	320.421	378.432	290.897	313.18	351.18	347.792	-0.0348715	0.30118	-0.115783	0.907824	1	-0.216337	0.301641	-0.7172	0.473251	0.999669	-0.181466	0.237068	-0.765458	0.443999	1	no	no	no	0
FBgn0011741	Arp6	Actin-related_protein_6	protein_coding	X	104	48	75	85	36	76	16	103.937	43.7988	67.6946	80.0168	41.5567	76.5327	16.5749	61.4445	-0.228392	0.384979	-0.593259	0.553008	1	-0.499673	0.384882	-1.29825	0.194202	0.96	-0.27128	0.396849	-0.683587	0.494236	1	no	no	no	0
FBgn0011742	Arp2	Actin-related_protein_2	protein_coding	X	910	1257	1310	770	770	1122	657	909.447	1146.98	1182.4	724.858	888.851	1129.86	680.606	951.858	0.138575	0.305141	0.454135	0.649732	1	-0.0216869	0.305292	-0.0710366	0.943369	0.999669	-0.160262	0.240541	-0.666257	0.505247	1	no	no	no	0
FBgn0011743	Arp53D	Actin-related_protein_53D	protein_coding	2R	0	6	0	0	0	0	0	0	5.47485	0	0	0	0	0	0.782121	0.0967272	0.118609	0.815512	0.414779	NA	0	0.118026	0	1	NA	-0.135029	0.154627	-0.873254	0.382525	NA	no	no	no	0
FBgn0011745	Arp1	Actin-related_protein_1	protein_coding	3R	318	317	244	246	238	267	318	317.807	289.255	220.233	231.578	274.736	268.871	329.426	275.986	-0.290529	0.323246	-0.898786	0.368767	1	-0.0826834	0.323253	-0.255786	0.798116	0.999669	0.207845	0.260071	0.799185	0.424183	1	no	no	no	0
FBgn0011746	ana	anachronism	protein_coding	2R	109	235	1003	322	411	183	106	108.934	214.432	905.303	303.122	474.439	184.283	109.809	328.617	0.922185	0.392558	2.34917	0.0188152	0.857026	0.333151	0.392593	0.848591	0.396109	0.999669	-0.589035	0.382037	-1.54183	0.123115	1	no	no	no	0
FBgn0011747	Ank	Ankyrin	protein_coding	4	1382	1149	1382	1088	1039	1169	1050	1381.16	1048.43	1247.39	1024.21	1199.37	1177.19	1087.73	1166.5	-0.290261	0.220834	-1.31439	0.188717	1	-0.231755	0.220943	-1.04894	0.294208	0.999669	0.0585056	0.164514	0.355628	0.722119	1	no	no	no	0
FBgn0011754	PhKgamma	Phosphorylase_kinase_gamma	protein_coding	X	893	898	732	960	696	596	620	892.457	819.403	660.7	903.719	803.429	600.177	642.276	760.309	-0.132624	0.272153	-0.487316	0.626035	1	-0.337043	0.272451	-1.23708	0.216058	0.973953	-0.204419	0.209176	-0.977259	0.328441	1	no	no	no	0
FBgn0011758	B-H1	BarH1	protein_coding	X	0	0	11	0	0	0	0	0	0	9.92855	0	0	0	0	1.41836	0.102371	0.121528	0.842364	0.399584	1	0	0.12117	0	1	NA	-0.143071	0.15844	-0.903001	0.366525	NA	no	no	no	0
FBgn0011760	ctp	cut_up	protein_coding	X	1547	1847	1663	1880	1282	1584	1453	1546.06	1685.34	1501.02	1769.78	1479.88	1595.1	1505.21	1583.2	0.0906127	0.199175	0.454939	0.649153	1	-0.0190899	0.199368	-0.0957523	0.923717	0.999669	-0.109703	0.146543	-0.748602	0.454097	1	no	no	no	0
FBgn0011761	dhd	deadhead	protein_coding	X	2	5	0	0	7	6	1	1.99878	4.56237	0	0	8.08047	6.04205	1.03593	3.1028	-0.0457631	0.168058	-0.272305	0.785387	1	0.0872742	0.167963	0.519604	0.60334	NA	0.133037	0.216453	0.614624	0.538803	NA	no	no	no	0
FBgn0011762	DNApol-alpha50	DNA_polymerase_alpha_50kD	protein_coding	3L	365	416	360	362	263	509	271	364.778	379.59	324.934	340.777	303.595	512.568	280.737	358.14	-0.0527723	0.33772	-0.156261	0.875828	1	0.00756176	0.337831	0.0223833	0.982142	0.999669	0.060334	0.276208	0.218437	0.827089	1	no	no	no	0
FBgn0011763	Dp	DP_transcription_factor	protein_coding	2R	3699	3755	3691	3389	3160	3120	3695	3696.75	3426.34	3331.48	3190.32	3647.75	3141.87	3827.76	3466.04	-0.148652	0.179463	-0.828313	0.407493	1	-0.0574059	0.179503	-0.319805	0.749116	0.999669	0.0912461	0.131044	0.696302	0.48624	1	no	no	no	0
FBgn0011764	Dsp1	Dorsal_switch_protein_1	protein_coding	X	1442	1543	1520	1357	897	1248	1116	1441.12	1407.95	1371.94	1277.44	1035.45	1256.75	1156.1	1278.11	-0.0776532	0.212951	-0.364653	0.71537	1	-0.302407	0.213249	-1.41809	0.156163	0.934575	-0.224754	0.158035	-1.42218	0.154975	1	no	no	no	0
FBgn0011766	E2f1	E2F_transcription_factor_1	protein_coding	3R	2497	3011	2980	2641	2448	2479	2094	2495.48	2747.46	2689.73	2486.17	2825.85	2496.38	2169.24	2558.62	0.0771843	0.199976	0.385969	0.69952	1	-0.00102812	0.200082	-0.00513851	0.9959	0.999822	-0.0782124	0.147167	-0.531454	0.595104	1	no	no	no	0
FBgn0011768	Fdh	Formaldehyde_dehydrogenase	protein_coding	3R	150	157	176	183	195	176	144	149.909	143.259	158.857	172.271	225.099	177.234	149.174	167.972	0.0336734	0.359342	0.0937087	0.925341	1	0.21255	0.359379	0.591438	0.554227	0.999669	0.178877	0.303483	0.589413	0.555584	1	no	no	no	0
FBgn0011769	Fdxh	Ferredoxin	protein_coding	3L	40	50	35	80	47	84	22	39.9757	45.6237	31.5908	75.3099	54.2546	84.5888	22.7905	50.5906	0.0982074	0.380352	0.258201	0.796251	1	0.143411	0.3803	0.377099	0.7061	0.999669	0.0452035	0.398504	0.113433	0.909687	1	no	no	no	0
FBgn0011770	Gip	GIP-like	protein_coding	X	40	56	71	46	79	37	43	39.9757	51.0986	64.0843	43.3032	91.1938	37.2593	44.545	53.0657	0.131832	0.388939	0.338953	0.734645	1	0.205775	0.388929	0.529082	0.596749	0.999669	0.0739429	0.392606	0.188339	0.850611	1	no	no	no	0
FBgn0011771	Hem	HEM-protein	protein_coding	3L	443	418	398	299	344	453	323	442.731	381.415	359.233	281.471	397.097	456.175	334.605	378.961	-0.308679	0.309895	-0.996078	0.319212	1	-0.115005	0.309915	-0.371085	0.710574	0.999669	0.193674	0.24583	0.787839	0.430791	1	no	no	no	0
FBgn0011774	Irbp	Inverted_repeat-binding_protein	protein_coding	3R	168	149	218	229	139	199	202	167.898	135.959	196.766	215.575	160.455	200.395	209.258	183.758	0.0765574	0.359758	0.212802	0.831481	1	0.123438	0.359918	0.342961	0.731628	0.999669	0.0468804	0.304249	0.154086	0.877542	1	no	no	no	0
FBgn0011785	BRWD3	BRWD3	protein_coding	3R	1397	1370	1442	1278	1197	1235	1243	1396.15	1250.09	1301.54	1203.08	1381.76	1243.66	1287.66	1294.85	-0.146471	0.201176	-0.728075	0.466568	1	-0.089204	0.20129	-0.443162	0.657649	0.999669	0.0572675	0.148329	0.386083	0.699435	1	no	no	no	0
FBgn0011787	mRpL12	mitochondrial_ribosomal_protein_L12	protein_coding	3L	608	587	765	953	585	691	743	607.63	535.623	690.485	897.129	675.296	695.843	769.696	695.957	0.178801	0.289939	0.616685	0.537442	1	0.189844	0.290067	0.654483	0.512801	0.999669	0.0110428	0.225211	0.0490331	0.960893	1	no	no	no	0
FBgn0011802	Gem3	Gemin3	protein_coding	3L	51	32	40	48	17	22	27	50.969	29.1992	36.1038	45.1859	19.624	22.1542	27.9701	33.0295	-0.112813	0.381878	-0.295417	0.767675	1	-0.454546	0.381613	-1.19112	0.233608	0.987478	-0.341733	0.398321	-0.857932	0.39093	1	no	no	no	0
FBgn0011812	Lcp1Psi	Larval_cuticle_protein_1_pseudogene	pseudogene	2R	0	52	8	48	15	0	12	0	47.4487	7.22076	45.1859	17.3153	0	12.4312	18.5145	0.41891	0.273683	1.53064	0.125859	1	-0.00168051	0.273152	-0.00615228	0.995091	0.999822	-0.42059	0.33355	-1.26095	0.207327	1	no	no	no	0
FBgn0011817	nmo	nemo	protein_coding	3L	6399	4964	8627	4968	3108	7491	3632	6395.11	4529.53	7786.69	4676.74	3587.73	7543.51	3762.5	5468.83	-0.125408	0.315026	-0.398089	0.690565	1	-0.294346	0.315051	-0.93428	0.35016	0.999669	-0.168937	0.25082	-0.673539	0.500604	1	no	no	no	0
FBgn0011818	oaf	out_at_first	protein_coding	2L	958	1057	1210	902	791	673	1143	957.417	964.486	1092.14	849.119	913.093	677.717	1184.07	948.291	0.0168969	0.287999	0.0586698	0.953215	1	-0.0439978	0.288132	-0.1527	0.878635	0.999669	-0.0608947	0.223649	-0.272279	0.785408	1	no	no	no	0
FBgn0011822	pcl	pepsinogen-like	protein_coding	X	0	0	0	0	0	0	0	?	?	?	?	?	?	?	?	?	?	?	?	?	?	?	?	?	?	?	?	?	?	?	no	no	no	#VALUE!
FBgn0011824	CG4038	?	protein_coding	2R	151	215	204	194	118	213	83	150.908	196.182	184.129	182.627	136.214	214.493	85.9822	164.362	0.217567	0.38004	0.572484	0.566994	1	-0.0635775	0.380339	-0.16716	0.867244	0.999669	-0.281144	0.337417	-0.833225	0.404718	1	no	no	no	0
FBgn0011826	Pp2B-14D	Protein_phosphatase_2B_at_14D	protein_coding	X	1424	1806	1725	1410	1450	1660	2002	1423.13	1647.93	1556.98	1327.34	1673.81	1671.64	2073.93	1624.96	0.0703937	0.223906	0.314389	0.753226	1	0.316607	0.223891	1.41411	0.157329	0.934575	0.246213	0.166422	1.47945	0.13902	1	no	no	no	0
FBgn0011828	Pxn	Peroxidasin	protein_coding	3L	2959	4999	2875	2742	4976	3716	3619	2957.2	4561.46	2594.96	2581.25	5744.06	3742.05	3749.03	3704.29	0.0875291	0.290883	0.300908	0.763485	1	0.4914	0.290861	1.68947	0.0911296	0.855526	0.403871	0.226263	1.78497	0.0742669	1	no	no	no	0
FBgn0011829	Ret	Ret_oncogene	protein_coding	2L	4	20	35	0	65	27	0	3.99757	18.2495	31.5908	0	75.0329	27.1892	0	22.2943	0.0241678	0.243589	0.0992154	0.920967	1	0.219689	0.24358	0.901917	0.367101	0.999669	0.195521	0.303064	0.645148	0.518831	1	no	no	no	0
FBgn0011832	Ser12	Serine_protease_12	protein_coding	2L	0	0	0	0	0	0	0	?	?	?	?	?	?	?	?	?	?	?	?	?	?	?	?	?	?	?	?	?	?	?	no	no	no	#VALUE!
FBgn0011834	Ser6	Serine_protease_6	protein_coding	X	0	0	0	0	0	0	0	?	?	?	?	?	?	?	?	?	?	?	?	?	?	?	?	?	?	?	?	?	?	?	no	no	no	#VALUE!
FBgn0011836	Taf2	TBP-associated_factor_2	protein_coding	3L	566	395	379	337	223	391	282	565.656	360.428	342.084	317.243	257.421	393.741	292.132	361.243	-0.570677	0.313645	-1.8195	0.0688356	1	-0.669572	0.313974	-2.13257	0.0329599	0.605584	-0.0988949	0.250697	-0.394479	0.693227	1	no	no	no	0
FBgn0011837	Tis11	Tis11_homolog	protein_coding	X	1907	2121	2048	1708	1838	1789	1608	1905.84	1935.36	1848.51	1607.87	2121.7	1801.54	1665.77	1840.94	-0.0781064	0.21533	-0.362729	0.716807	1	-0.0286827	0.215405	-0.133158	0.894069	0.999669	0.0494236	0.159659	0.309557	0.756898	1	no	no	no	0
FBgn0011840	tRNA:A:90C	transfer_RNA:ala:90C	tRNA	3R	?	?	?	?	?	?	?	?	?	?	?	?	?	?	?	?	?	?	?	?	?	?	?	?	?	?	?	?	?	?	no	no	no	#VALUE!
FBgn0011844	tRNA:D2:69F	transfer_RNA:asp2:69F	tRNA	3L	?	?	?	?	?	?	?	?	?	?	?	?	?	?	?	?	?	?	?	?	?	?	?	?	?	?	?	?	?	?	no	no	no	#VALUE!
FBgn0011845	tRNA:D:96A	transfer_RNA:asp:96A	tRNA	3R	?	?	?	?	?	?	?	?	?	?	?	?	?	?	?	?	?	?	?	?	?	?	?	?	?	?	?	?	?	?	no	no	no	#VALUE!
FBgn0011848	tRNA:E4:56Fa	transfer_RNA:glu4:56Fa	tRNA	2R	?	?	?	?	?	?	?	?	?	?	?	?	?	?	?	?	?	?	?	?	?	?	?	?	?	?	?	?	?	?	no	no	no	#VALUE!
FBgn0011849	tRNA:E4:56Fb	transfer_RNA:glu4:56Fb	tRNA	2R	?	?	?	?	?	?	?	?	?	?	?	?	?	?	?	?	?	?	?	?	?	?	?	?	?	?	?	?	?	?	no	no	no	#VALUE!
FBgn0011850	tRNA:E4:56Fc	transfer_RNA:glu4:56Fc	tRNA	2R	?	?	?	?	?	?	?	?	?	?	?	?	?	?	?	?	?	?	?	?	?	?	?	?	?	?	?	?	?	?	no	no	no	#VALUE!
FBgn0011851	tRNA:E4:62Aa	transfer_RNA:glu4:62Aa	tRNA	3L	?	?	?	?	?	?	?	?	?	?	?	?	?	?	?	?	?	?	?	?	?	?	?	?	?	?	?	?	?	?	no	no	no	#VALUE!
FBgn0011852	tRNA:E4:62Ab	transfer_RNA:glu4:62Ab	tRNA	3L	?	?	?	?	?	?	?	?	?	?	?	?	?	?	?	?	?	?	?	?	?	?	?	?	?	?	?	?	?	?	no	no	no	#VALUE!
FBgn0011853	tRNA:E4:62Ac	transfer_RNA:glu4:62Ac	tRNA	3L	?	?	?	?	?	?	?	?	?	?	?	?	?	?	?	?	?	?	?	?	?	?	?	?	?	?	?	?	?	?	no	no	no	#VALUE!
FBgn0011854	tRNA:E4:62Ad	transfer_RNA:glu4:62Ad	tRNA	3L	?	?	?	?	?	?	?	?	?	?	?	?	?	?	?	?	?	?	?	?	?	?	?	?	?	?	?	?	?	?	no	no	no	#VALUE!
FBgn0011855	tRNA:E4:62Ae	transfer_RNA:glu4:62Ae	tRNA	3L	?	?	?	?	?	?	?	?	?	?	?	?	?	?	?	?	?	?	?	?	?	?	?	?	?	?	?	?	?	?	no	no	no	#VALUE!
FBgn0011858	tRNA:F2:89BC	transfer_RNA:phe2:89BC	tRNA	3R	?	?	?	?	?	?	?	?	?	?	?	?	?	?	?	?	?	?	?	?	?	?	?	?	?	?	?	?	?	?	no	no	no	#VALUE!
FBgn0011859	tRNA:G3:22BCa	transfer_RNA:gly3:22BCa	tRNA	2L	?	?	?	?	?	?	?	?	?	?	?	?	?	?	?	?	?	?	?	?	?	?	?	?	?	?	?	?	?	?	no	no	no	#VALUE!
FBgn0011860	tRNA:G3:22BCb	transfer_RNA:gly3:22BCb	tRNA	2L	?	?	?	?	?	?	?	?	?	?	?	?	?	?	?	?	?	?	?	?	?	?	?	?	?	?	?	?	?	?	no	no	no	#VALUE!
FBgn0011861	tRNA:G3:28D	transfer_RNA:gly3:28D	tRNA	2L	?	?	?	?	?	?	?	?	?	?	?	?	?	?	?	?	?	?	?	?	?	?	?	?	?	?	?	?	?	?	no	no	no	#VALUE!
FBgn0011862	tRNA:G3:35Ba	transfer_RNA:gly3:35Ba	tRNA	2L	?	?	?	?	?	?	?	?	?	?	?	?	?	?	?	?	?	?	?	?	?	?	?	?	?	?	?	?	?	?	no	no	no	#VALUE!
FBgn0011863	tRNA:G3:35Bb	transfer_RNA:gly3:35Bb	tRNA	2L	?	?	?	?	?	?	?	?	?	?	?	?	?	?	?	?	?	?	?	?	?	?	?	?	?	?	?	?	?	?	no	no	no	#VALUE!
FBgn0011864	tRNA:G3:35Bc	transfer_RNA:gly3:35Bc	tRNA	2L	?	?	?	?	?	?	?	?	?	?	?	?	?	?	?	?	?	?	?	?	?	?	?	?	?	?	?	?	?	?	no	no	no	#VALUE!
FBgn0011865	tRNA:G3:35Bd	transfer_RNA:gly3:35Bd	tRNA	2L	?	?	?	?	?	?	?	?	?	?	?	?	?	?	?	?	?	?	?	?	?	?	?	?	?	?	?	?	?	?	no	no	no	#VALUE!
FBgn0011866	tRNA:G3:35Be	transfer_RNA:gly3:35Be	tRNA	2L	?	?	?	?	?	?	?	?	?	?	?	?	?	?	?	?	?	?	?	?	?	?	?	?	?	?	?	?	?	?	no	no	no	#VALUE!
FBgn0011867	tRNA:G3:53E	transfer_RNA:gly3:53E	tRNA	2R	?	?	?	?	?	?	?	?	?	?	?	?	?	?	?	?	?	?	?	?	?	?	?	?	?	?	?	?	?	?	no	no	no	#VALUE!
FBgn0011868	tRNA:G3:55E	transfer_RNA:gly3:55E	tRNA	2R	?	?	?	?	?	?	?	?	?	?	?	?	?	?	?	?	?	?	?	?	?	?	?	?	?	?	?	?	?	?	no	no	no	#VALUE!
FBgn0011869	tRNA:G3:56EFa	transfer_RNA:gly3:56EFa	tRNA	2R	?	?	?	?	?	?	?	?	?	?	?	?	?	?	?	?	?	?	?	?	?	?	?	?	?	?	?	?	?	?	no	no	no	#VALUE!
FBgn0011870	tRNA:G3:56EFb	transfer_RNA:gly3:56EFb	tRNA	2R	?	?	?	?	?	?	?	?	?	?	?	?	?	?	?	?	?	?	?	?	?	?	?	?	?	?	?	?	?	?	no	no	no	#VALUE!
FBgn0011871	tRNA:G3:57BCa	transfer_RNA:gly3:57BCa	tRNA	2R	?	?	?	?	?	?	?	?	?	?	?	?	?	?	?	?	?	?	?	?	?	?	?	?	?	?	?	?	?	?	no	no	no	#VALUE!
FBgn0011872	tRNA:G3:57BCb	transfer_RNA:gly3:57BCb	tRNA	2R	?	?	?	?	?	?	?	?	?	?	?	?	?	?	?	?	?	?	?	?	?	?	?	?	?	?	?	?	?	?	no	no	no	#VALUE!
FBgn0011877	tRNA:HPsi	transfer_RNA:his:pseudogene	pseudogene	2R	0	0	0	0	0	0	0	?	?	?	?	?	?	?	?	?	?	?	?	?	?	?	?	?	?	?	?	?	?	?	no	no	no	#VALUE!
FBgn0011878	tRNA:H:48F	transfer_RNA:his:48F	tRNA	2R	?	?	?	?	?	?	?	?	?	?	?	?	?	?	?	?	?	?	?	?	?	?	?	?	?	?	?	?	?	?	no	no	no	#VALUE!
FBgn0011879	tRNA:CR30233	transfer_RNA:CR30233	tRNA	2R	?	?	?	?	?	?	?	?	?	?	?	?	?	?	?	?	?	?	?	?	?	?	?	?	?	?	?	?	?	?	no	no	no	#VALUE!
FBgn0011880	tRNA:I:42A	transfer_RNA:ile:42A	tRNA	2R	?	?	?	?	?	?	?	?	?	?	?	?	?	?	?	?	?	?	?	?	?	?	?	?	?	?	?	?	?	?	no	no	no	#VALUE!
FBgn0011881	tRNA:I:49Fa	transfer_RNA:ile:49Fa	tRNA	2R	?	?	?	?	?	?	?	?	?	?	?	?	?	?	?	?	?	?	?	?	?	?	?	?	?	?	?	?	?	?	no	no	no	#VALUE!
FBgn0011882	tRNA:I:49Fb	transfer_RNA:ile:49Fb	tRNA	2R	?	?	?	?	?	?	?	?	?	?	?	?	?	?	?	?	?	?	?	?	?	?	?	?	?	?	?	?	?	?	no	no	no	#VALUE!
FBgn0011883	tRNA:I:49Fc	transfer_RNA:ile:49Fc	tRNA	2R	?	?	?	?	?	?	?	?	?	?	?	?	?	?	?	?	?	?	?	?	?	?	?	?	?	?	?	?	?	?	no	no	no	#VALUE!
FBgn0011884	tRNA:I:49Fd	transfer_RNA:ile:49Fd	tRNA	2R	?	?	?	?	?	?	?	?	?	?	?	?	?	?	?	?	?	?	?	?	?	?	?	?	?	?	?	?	?	?	no	no	no	#VALUE!
FBgn0011885	tRNA:I:49Fe	transfer_RNA:ile:49Fe	tRNA	2R	?	?	?	?	?	?	?	?	?	?	?	?	?	?	?	?	?	?	?	?	?	?	?	?	?	?	?	?	?	?	no	no	no	#VALUE!
FBgn0011887	tRNA:K2:42Aa	transfer_RNA:lys2:42Aa	tRNA	2R	?	?	?	?	?	?	?	?	?	?	?	?	?	?	?	?	?	?	?	?	?	?	?	?	?	?	?	?	?	?	no	no	no	#VALUE!
FBgn0011888	tRNA:K2:42Ab	transfer_RNA:lys2:42Ab	tRNA	2R	?	?	?	?	?	?	?	?	?	?	?	?	?	?	?	?	?	?	?	?	?	?	?	?	?	?	?	?	?	?	no	no	no	#VALUE!
FBgn0011889	tRNA:K2:42Ac	transfer_RNA:lys2:42Ac	tRNA	2R	?	?	?	?	?	?	?	?	?	?	?	?	?	?	?	?	?	?	?	?	?	?	?	?	?	?	?	?	?	?	no	no	no	#VALUE!
FBgn0011890	tRNA:K2:42Ad	transfer_RNA:lys2:42Ad	tRNA	2R	?	?	?	?	?	?	?	?	?	?	?	?	?	?	?	?	?	?	?	?	?	?	?	?	?	?	?	?	?	?	no	no	no	#VALUE!
FBgn0011891	tRNA:K2:42Ae	transfer_RNA:lys2:42Ae	tRNA	2R	?	?	?	?	?	?	?	?	?	?	?	?	?	?	?	?	?	?	?	?	?	?	?	?	?	?	?	?	?	?	no	no	no	#VALUE!
FBgn0011892	tRNA:K2:42Ea	transfer_RNA:lys2:42Ea	tRNA	2R	?	?	?	?	?	?	?	?	?	?	?	?	?	?	?	?	?	?	?	?	?	?	?	?	?	?	?	?	?	?	no	no	no	#VALUE!
FBgn0011893	tRNA:K2:42Eb	transfer_RNA:lys2:42Eb	tRNA	2R	?	?	?	?	?	?	?	?	?	?	?	?	?	?	?	?	?	?	?	?	?	?	?	?	?	?	?	?	?	?	no	no	no	#VALUE!
FBgn0011894	tRNA:K2:42Ec	transfer_RNA:lys2:42Ec	tRNA	2R	?	?	?	?	?	?	?	?	?	?	?	?	?	?	?	?	?	?	?	?	?	?	?	?	?	?	?	?	?	?	no	no	no	#VALUE!
FBgn0011895	tRNA:K2:42Ed	transfer_RNA:lys2:42Ed	tRNA	2R	?	?	?	?	?	?	?	?	?	?	?	?	?	?	?	?	?	?	?	?	?	?	?	?	?	?	?	?	?	?	no	no	no	#VALUE!
FBgn0011896	tRNA:K2:50C	transfer_RNA:lys2:50C	tRNA	2R	?	?	?	?	?	?	?	?	?	?	?	?	?	?	?	?	?	?	?	?	?	?	?	?	?	?	?	?	?	?	no	no	no	#VALUE!
FBgn0011897	tRNA:K2:56EF	transfer_RNA:lys2:56EF	tRNA	2R	?	?	?	?	?	?	?	?	?	?	?	?	?	?	?	?	?	?	?	?	?	?	?	?	?	?	?	?	?	?	no	no	no	#VALUE!
FBgn0011902	tRNA:K5:29A	transfer_RNA:lys5:29A	tRNA	2L	?	?	?	?	?	?	?	?	?	?	?	?	?	?	?	?	?	?	?	?	?	?	?	?	?	?	?	?	?	?	no	no	no	#VALUE!
FBgn0011904	tRNA:K5:84ABa	transfer_RNA:lys5:84AB	tRNA	3R	?	?	?	?	?	?	?	?	?	?	?	?	?	?	?	?	?	?	?	?	?	?	?	?	?	?	?	?	?	?	no	no	no	#VALUE!
FBgn0011905	tRNA:K5:87BC	transfer_RNA:lys5:87BC	tRNA	3R	?	?	?	?	?	?	?	?	?	?	?	?	?	?	?	?	?	?	?	?	?	?	?	?	?	?	?	?	?	?	no	no	no	#VALUE!
FBgn0011906	tRNA:L2:44EF	transfer_RNA:leu2:44EF	tRNA	2R	?	?	?	?	?	?	?	?	?	?	?	?	?	?	?	?	?	?	?	?	?	?	?	?	?	?	?	?	?	?	no	no	no	#VALUE!
FBgn0011909	tRNA:L3:49Fa	transfer_RNA:leu:49Fa	tRNA	2R	?	?	?	?	?	?	?	?	?	?	?	?	?	?	?	?	?	?	?	?	?	?	?	?	?	?	?	?	?	?	no	no	no	#VALUE!
FBgn0011910	tRNA:L3:49Fb	transfer_RNA:leu:49Fb	tRNA	2R	?	?	?	?	?	?	?	?	?	?	?	?	?	?	?	?	?	?	?	?	?	?	?	?	?	?	?	?	?	?	no	no	no	#VALUE!
FBgn0011915	tRNA:M2:48Ba	transfer_RNA:met2:48Ba	tRNA	2R	?	?	?	?	?	?	?	?	?	?	?	?	?	?	?	?	?	?	?	?	?	?	?	?	?	?	?	?	?	?	no	no	no	#VALUE!
FBgn0011916	tRNA:M2:48Bb	transfer_RNA:met2:48Bb	tRNA	2R	?	?	?	?	?	?	?	?	?	?	?	?	?	?	?	?	?	?	?	?	?	?	?	?	?	?	?	?	?	?	no	no	no	#VALUE!
FBgn0011919	tRNA:M2:83F	transfer_RNA:met2:83F	tRNA	3R	?	?	?	?	?	?	?	?	?	?	?	?	?	?	?	?	?	?	?	?	?	?	?	?	?	?	?	?	?	?	no	no	no	#VALUE!
FBgn0011921	tRNA:M3:46A	transfer_RNA:met3:46A	tRNA	2R	?	?	?	?	?	?	?	?	?	?	?	?	?	?	?	?	?	?	?	?	?	?	?	?	?	?	?	?	?	?	no	no	no	#VALUE!
FBgn0011927	tRNA:M3:70Fa	transfer_RNA:met3:70Fa	tRNA	3L	?	?	?	?	?	?	?	?	?	?	?	?	?	?	?	?	?	?	?	?	?	?	?	?	?	?	?	?	?	?	no	no	no	#VALUE!
FBgn0011928	tRNA:M3:70Fb	transfer_RNA:met3:70Fb	tRNA	3L	?	?	?	?	?	?	?	?	?	?	?	?	?	?	?	?	?	?	?	?	?	?	?	?	?	?	?	?	?	?	no	no	no	#VALUE!
FBgn0011931	tRNA:N5:42Aa	transfer_RNA:asn5:42Aa	tRNA	2R	?	?	?	?	?	?	?	?	?	?	?	?	?	?	?	?	?	?	?	?	?	?	?	?	?	?	?	?	?	?	no	no	no	#VALUE!
FBgn0011932	tRNA:N5:42Ab	transfer_RNA:asn5:42Ab	tRNA	2R	?	?	?	?	?	?	?	?	?	?	?	?	?	?	?	?	?	?	?	?	?	?	?	?	?	?	?	?	?	?	no	no	no	#VALUE!
FBgn0011933	tRNA:N5:42Ac	transfer_RNA:asn5:42Ac	tRNA	2R	?	?	?	?	?	?	?	?	?	?	?	?	?	?	?	?	?	?	?	?	?	?	?	?	?	?	?	?	?	?	no	no	no	#VALUE!
FBgn0011934	tRNA:N5:42Ad	transfer_RNA:asn5:42Ad	tRNA	2R	?	?	?	?	?	?	?	?	?	?	?	?	?	?	?	?	?	?	?	?	?	?	?	?	?	?	?	?	?	?	no	no	no	#VALUE!
FBgn0011935	tRNA:N5:42Ae	transfer_RNA:asn5:42Ae	tRNA	2R	?	?	?	?	?	?	?	?	?	?	?	?	?	?	?	?	?	?	?	?	?	?	?	?	?	?	?	?	?	?	no	no	no	#VALUE!
FBgn0011936	tRNA:N5:42Af	transfer_RNA:asn5:42Af	tRNA	2R	?	?	?	?	?	?	?	?	?	?	?	?	?	?	?	?	?	?	?	?	?	?	?	?	?	?	?	?	?	?	no	no	no	#VALUE!
FBgn0011937	tRNA:N5:42Ag	transfer_RNA:asn5:42Ag	tRNA	2R	?	?	?	?	?	?	?	?	?	?	?	?	?	?	?	?	?	?	?	?	?	?	?	?	?	?	?	?	?	?	no	no	no	#VALUE!
FBgn0011938	tRNA:N5:42Ah	transfer_RNA:asn5:42Ah	tRNA	2R	?	?	?	?	?	?	?	?	?	?	?	?	?	?	?	?	?	?	?	?	?	?	?	?	?	?	?	?	?	?	no	no	no	#VALUE!
FBgn0011944	tRNA:P:90Ca	transfer_RNA:pro:90Ca	tRNA	3R	?	?	?	?	?	?	?	?	?	?	?	?	?	?	?	?	?	?	?	?	?	?	?	?	?	?	?	?	?	?	no	no	no	#VALUE!
FBgn0011945	tRNA:P:90Cb	transfer_RNA:pro:90Cb	tRNA	3R	?	?	?	?	?	?	?	?	?	?	?	?	?	?	?	?	?	?	?	?	?	?	?	?	?	?	?	?	?	?	no	no	no	#VALUE!
FBgn0011948	tRNA:R:12Ea	transfer_RNA:arg:12Ea	tRNA	X	?	?	?	?	?	?	?	?	?	?	?	?	?	?	?	?	?	?	?	?	?	?	?	?	?	?	?	?	?	?	no	no	no	#VALUE!
FBgn0011949	tRNA:R:12Eb	transfer_RNA:arg:12Eb	tRNA	X	?	?	?	?	?	?	?	?	?	?	?	?	?	?	?	?	?	?	?	?	?	?	?	?	?	?	?	?	?	?	no	no	no	#VALUE!
FBgn0011950	tRNA:R:12Ec	transfer_RNA:arg:12Ec	tRNA	X	?	?	?	?	?	?	?	?	?	?	?	?	?	?	?	?	?	?	?	?	?	?	?	?	?	?	?	?	?	?	no	no	no	#VALUE!
FBgn0011951	tRNA:R:12Ed	transfer_RNA:arg:12Ed	tRNA	X	?	?	?	?	?	?	?	?	?	?	?	?	?	?	?	?	?	?	?	?	?	?	?	?	?	?	?	?	?	?	no	no	no	#VALUE!
FBgn0011952	tRNA:R:12Ee	transfer_RNA:arg:12Ee	tRNA	X	?	?	?	?	?	?	?	?	?	?	?	?	?	?	?	?	?	?	?	?	?	?	?	?	?	?	?	?	?	?	no	no	no	#VALUE!
FBgn0011953	tRNA:R:12Ef	transfer_RNA:arg:12Ef	tRNA	X	?	?	?	?	?	?	?	?	?	?	?	?	?	?	?	?	?	?	?	?	?	?	?	?	?	?	?	?	?	?	no	no	no	#VALUE!
FBgn0011954	tRNA:R:19F	transfer_RNA:arg:19F	tRNA	X	?	?	?	?	?	?	?	?	?	?	?	?	?	?	?	?	?	?	?	?	?	?	?	?	?	?	?	?	?	?	no	no	no	#VALUE!
FBgn0011955	tRNA:R2:42Aa	transfer_RNA:arg2:42Aa	tRNA	2R	?	?	?	?	?	?	?	?	?	?	?	?	?	?	?	?	?	?	?	?	?	?	?	?	?	?	?	?	?	?	no	no	no	#VALUE!
FBgn0011956	tRNA:R2:42Ab	transfer_RNA:arg2:42Ab	tRNA	2R	?	?	?	?	?	?	?	?	?	?	?	?	?	?	?	?	?	?	?	?	?	?	?	?	?	?	?	?	?	?	no	no	no	#VALUE!
FBgn0011957	tRNA:R2:42Ac	transfer_RNA:arg2:42Ac	tRNA	2R	?	?	?	?	?	?	?	?	?	?	?	?	?	?	?	?	?	?	?	?	?	?	?	?	?	?	?	?	?	?	no	no	no	#VALUE!
FBgn0011958	tRNA:R2:42Ad	transfer_RNA:arg2:42Ad	tRNA	2R	?	?	?	?	?	?	?	?	?	?	?	?	?	?	?	?	?	?	?	?	?	?	?	?	?	?	?	?	?	?	no	no	no	#VALUE!
FBgn0011959	tRNA:R2:84Fa	transfer_RNA:arg2:84Fa	tRNA	3R	?	?	?	?	?	?	?	?	?	?	?	?	?	?	?	?	?	?	?	?	?	?	?	?	?	?	?	?	?	?	no	no	no	#VALUE!
FBgn0011960	tRNA:R2:84Fb	transfer_RNA:arg2:84Fb	tRNA	3R	?	?	?	?	?	?	?	?	?	?	?	?	?	?	?	?	?	?	?	?	?	?	?	?	?	?	?	?	?	?	no	no	no	#VALUE!
FBgn0011961	tRNA:R2:84Fc	transfer_RNA:arg2:84Fc	tRNA	3R	?	?	?	?	?	?	?	?	?	?	?	?	?	?	?	?	?	?	?	?	?	?	?	?	?	?	?	?	?	?	no	no	no	#VALUE!
FBgn0011962	tRNA:R2:84Fd	transfer_RNA:arg2:84Fd	tRNA	3R	?	?	?	?	?	?	?	?	?	?	?	?	?	?	?	?	?	?	?	?	?	?	?	?	?	?	?	?	?	?	no	no	no	#VALUE!
FBgn0011963	tRNA:R2:84Fe	transfer_RNA:arg2:84Fe	tRNA	3R	?	?	?	?	?	?	?	?	?	?	?	?	?	?	?	?	?	?	?	?	?	?	?	?	?	?	?	?	?	?	no	no	no	#VALUE!
FBgn0011965	tRNA:R:83AB	transfer_RNA:arg:83AB	tRNA	3R	?	?	?	?	?	?	?	?	?	?	?	?	?	?	?	?	?	?	?	?	?	?	?	?	?	?	?	?	?	?	no	no	no	#VALUE!
FBgn0011966	tRNA:R:85Ca	transfer_RNA:arg:85Ca	tRNA	3R	?	?	?	?	?	?	?	?	?	?	?	?	?	?	?	?	?	?	?	?	?	?	?	?	?	?	?	?	?	?	no	no	no	#VALUE!
FBgn0011970	tRNA:S2b:86A	transfer_RNA:ser2b:86A	tRNA	3R	?	?	?	?	?	?	?	?	?	?	?	?	?	?	?	?	?	?	?	?	?	?	?	?	?	?	?	?	?	?	no	no	no	#VALUE!
FBgn0011971	tRNA:S2b:88A	transfer_RNA:ser2b:88A	tRNA	3R	?	?	?	?	?	?	?	?	?	?	?	?	?	?	?	?	?	?	?	?	?	?	?	?	?	?	?	?	?	?	no	no	no	#VALUE!
FBgn0011974	tRNA:S474:12Eh	transfer_RNA:ser474:12Eh	tRNA	X	?	?	?	?	?	?	?	?	?	?	?	?	?	?	?	?	?	?	?	?	?	?	?	?	?	?	?	?	?	?	no	no	no	#VALUE!
FBgn0011975	tRNA:S4:12Ea	transfer_RNA:ser4:12Ea	tRNA	X	?	?	?	?	?	?	?	?	?	?	?	?	?	?	?	?	?	?	?	?	?	?	?	?	?	?	?	?	?	?	no	no	no	#VALUE!
FBgn0011976	tRNA:S4:12Eb	transfer_RNA:ser4:12Eb	tRNA	X	?	?	?	?	?	?	?	?	?	?	?	?	?	?	?	?	?	?	?	?	?	?	?	?	?	?	?	?	?	?	no	no	no	#VALUE!
FBgn0011977	tRNA:S4:12Ee	transfer_RNA:ser4:12Ee	tRNA	X	?	?	?	?	?	?	?	?	?	?	?	?	?	?	?	?	?	?	?	?	?	?	?	?	?	?	?	?	?	?	no	no	no	#VALUE!
FBgn0011980	tRNA:S774:12Ec	transfer_RNA:ser774:12Ec	tRNA	X	?	?	?	?	?	?	?	?	?	?	?	?	?	?	?	?	?	?	?	?	?	?	?	?	?	?	?	?	?	?	no	no	no	#VALUE!
FBgn0011981	tRNA:S774:12Ef	transfer_RNA:ser774:12Ef	tRNA	X	?	?	?	?	?	?	?	?	?	?	?	?	?	?	?	?	?	?	?	?	?	?	?	?	?	?	?	?	?	?	no	no	no	#VALUE!
FBgn0011982	tRNA:S7:12Ed	transfer_RNA:ser7:12Ed	tRNA	X	?	?	?	?	?	?	?	?	?	?	?	?	?	?	?	?	?	?	?	?	?	?	?	?	?	?	?	?	?	?	no	no	no	#VALUE!
FBgn0011983	tRNA:S7:12Eg	transfer_RNA:ser7:12Eg	tRNA	X	?	?	?	?	?	?	?	?	?	?	?	?	?	?	?	?	?	?	?	?	?	?	?	?	?	?	?	?	?	?	no	no	no	#VALUE!
FBgn0011984	tRNA:S7:23Ea	transfer_RNA:ser7:23Ea	tRNA	2L	?	?	?	?	?	?	?	?	?	?	?	?	?	?	?	?	?	?	?	?	?	?	?	?	?	?	?	?	?	?	no	no	no	#VALUE!
FBgn0011985	tRNA:S7:23Eb	transfer_RNA:ser7:23Eb	tRNA	2L	?	?	?	?	?	?	?	?	?	?	?	?	?	?	?	?	?	?	?	?	?	?	?	?	?	?	?	?	?	?	no	no	no	#VALUE!
FBgn0011986	tRNA:S7:64D	transfer_RNA:ser7:64D	tRNA	3L	?	?	?	?	?	?	?	?	?	?	?	?	?	?	?	?	?	?	?	?	?	?	?	?	?	?	?	?	?	?	no	no	no	#VALUE!
FBgn0011987	tRNA:SeC	transfer_RNA:SeCys	tRNA	2R	?	?	?	?	?	?	?	?	?	?	?	?	?	?	?	?	?	?	?	?	?	?	?	?	?	?	?	?	?	?	no	no	no	#VALUE!
FBgn0011993	tRNA:T:90Ca	transfer_RNA:thr:90Ca	tRNA	3R	?	?	?	?	?	?	?	?	?	?	?	?	?	?	?	?	?	?	?	?	?	?	?	?	?	?	?	?	?	?	no	no	no	#VALUE!
FBgn0011994	tRNA:T:90Cb	transfer_RNA:thr:90Cb	tRNA	3R	?	?	?	?	?	?	?	?	?	?	?	?	?	?	?	?	?	?	?	?	?	?	?	?	?	?	?	?	?	?	no	no	no	#VALUE!
FBgn0011998	tRNA:V3b:84Da	transfer_RNA:val3b:84Da	tRNA	3R	?	?	?	?	?	?	?	?	?	?	?	?	?	?	?	?	?	?	?	?	?	?	?	?	?	?	?	?	?	?	no	no	no	#VALUE!
FBgn0011999	tRNA:V3b:84Db	transfer_RNA:val3b:84Db	tRNA	3R	?	?	?	?	?	?	?	?	?	?	?	?	?	?	?	?	?	?	?	?	?	?	?	?	?	?	?	?	?	?	no	no	no	#VALUE!
FBgn0012000	tRNA:V3b:84Dc	transfer_RNA:val3b:84Dc	tRNA	3R	?	?	?	?	?	?	?	?	?	?	?	?	?	?	?	?	?	?	?	?	?	?	?	?	?	?	?	?	?	?	no	no	no	#VALUE!
FBgn0012001	tRNA:V3b:84Dd	transfer_RNA:val3b:84Dd	tRNA	3R	?	?	?	?	?	?	?	?	?	?	?	?	?	?	?	?	?	?	?	?	?	?	?	?	?	?	?	?	?	?	no	no	no	#VALUE!
FBgn0012002	tRNA:V3b:90BC	transfer_RNA:val3b:90BC	tRNA	3R	?	?	?	?	?	?	?	?	?	?	?	?	?	?	?	?	?	?	?	?	?	?	?	?	?	?	?	?	?	?	no	no	no	#VALUE!
FBgn0012003	tRNA:V3b:92Ba	transfer_RNA:val3b:92Ba	tRNA	3R	?	?	?	?	?	?	?	?	?	?	?	?	?	?	?	?	?	?	?	?	?	?	?	?	?	?	?	?	?	?	no	no	no	#VALUE!
FBgn0012004	tRNA:V3b:92Bb	transfer_RNA:val3b:92Bb	tRNA	3R	?	?	?	?	?	?	?	?	?	?	?	?	?	?	?	?	?	?	?	?	?	?	?	?	?	?	?	?	?	?	no	no	no	#VALUE!
FBgn0012009	tRNA:V4:70BCa	transfer_RNA:val4:70BCa	tRNA	3L	?	?	?	?	?	?	?	?	?	?	?	?	?	?	?	?	?	?	?	?	?	?	?	?	?	?	?	?	?	?	no	no	no	#VALUE!
FBgn0012010	tRNA:V4:70BCb	transfer_RNA:val4:70BCb	tRNA	3L	?	?	?	?	?	?	?	?	?	?	?	?	?	?	?	?	?	?	?	?	?	?	?	?	?	?	?	?	?	?	no	no	no	#VALUE!
FBgn0012011	tRNA:V4:89BC	transfer_RNA:val4:89BC	tRNA	3R	?	?	?	?	?	?	?	?	?	?	?	?	?	?	?	?	?	?	?	?	?	?	?	?	?	?	?	?	?	?	no	no	no	#VALUE!
FBgn0012016	tRNA:Y1:22Fa	transfer_RNA:tyr1:22Fa	tRNA	2L	?	?	?	?	?	?	?	?	?	?	?	?	?	?	?	?	?	?	?	?	?	?	?	?	?	?	?	?	?	?	no	no	no	#VALUE!
FBgn0012017	tRNA:Y1:22Fb	transfer_RNA:tyr1:22Fb	tRNA	2L	?	?	?	?	?	?	?	?	?	?	?	?	?	?	?	?	?	?	?	?	?	?	?	?	?	?	?	?	?	?	no	no	no	#VALUE!
FBgn0012018	tRNA:Y1:28C	transfer_RNA:tyr1:28C	tRNA	2L	?	?	?	?	?	?	?	?	?	?	?	?	?	?	?	?	?	?	?	?	?	?	?	?	?	?	?	?	?	?	no	no	no	#VALUE!
FBgn0012024	tRNA:Y1:85Aa	transfer_RNA:tyr1:85Aa	tRNA	3R	?	?	?	?	?	?	?	?	?	?	?	?	?	?	?	?	?	?	?	?	?	?	?	?	?	?	?	?	?	?	no	no	no	#VALUE!
FBgn0012025	tRNA:Y1:85Ab	transfer_RNA:tyr1:85Ab	tRNA	3R	?	?	?	?	?	?	?	?	?	?	?	?	?	?	?	?	?	?	?	?	?	?	?	?	?	?	?	?	?	?	no	no	no	#VALUE!
FBgn0012026	tRNA:Y1:85Ac	transfer_RNA:tyr1:85Ac	tRNA	3R	?	?	?	?	?	?	?	?	?	?	?	?	?	?	?	?	?	?	?	?	?	?	?	?	?	?	?	?	?	?	no	no	no	#VALUE!
FBgn0012027	tRNA:Y1:85Ad	transfer_RNA:tyr1:85Ad	tRNA	3R	?	?	?	?	?	?	?	?	?	?	?	?	?	?	?	?	?	?	?	?	?	?	?	?	?	?	?	?	?	?	no	no	no	#VALUE!
FBgn0012028	tRNA:Y1:85Ae	transfer_RNA:tyr1:85Ae	tRNA	3R	?	?	?	?	?	?	?	?	?	?	?	?	?	?	?	?	?	?	?	?	?	?	?	?	?	?	?	?	?	?	no	no	no	#VALUE!
FBgn0012034	AcCoAS	Acetyl_Coenzyme_A_synthase	protein_coding	3L	288	698	303	381	872	306	394	287.825	636.908	273.486	358.663	1006.6	308.145	408.156	468.54	0.255823	0.383412	0.667228	0.504626	1	0.590432	0.383391	1.54003	0.123554	0.909928	0.334609	0.343938	0.972876	0.330615	1	no	no	no	0
FBgn0012036	Aldh	Aldehyde_dehydrogenase	protein_coding	2L	109	346	221	246	431	248	337	108.934	315.716	199.474	231.578	497.526	249.738	349.108	278.868	0.696024	0.36088	1.92869	0.0537696	1	1.15576	0.360731	3.20394	0.0013556	0.0899213	0.459736	0.304016	1.51221	0.130481	1	no	yes	no	1
FBgn0012037	Ance	Angiotensin_converting_enzyme	protein_coding	2L	484	334	1110	413	397	421	291	483.706	304.767	1001.88	388.787	458.278	423.951	301.456	480.403	0.182181	0.376251	0.484201	0.628243	1	-0.22259	0.376403	-0.59136	0.554279	0.999669	-0.404771	0.330332	-1.22535	0.220445	1	no	no	no	0
FBgn0012042	AttA	Attacin-A	protein_coding	2R	0	9	0	0	0	0	33	0	8.21227	0	0	0	0	34.1857	6.05685	-0.0149358	0.136916	-0.109088	NA	NA	0.094744	0.136882	0.69216	NA	NA	0.10968	0.178018	0.616118	NA	NA	no	no	no	0
FBgn0012051	CalpA	Calpain-A	protein_coding	2R	192	172	183	136	76	212	153	191.883	156.946	165.175	128.027	87.7308	213.486	158.497	157.392	-0.211056	0.381404	-0.553367	0.580012	1	-0.187018	0.381519	-0.490193	0.623997	0.999669	0.0240383	0.340278	0.0706431	0.943682	1	no	no	no	0
FBgn0012058	Cdc27	Cell_division_cycle_27_ortholog	protein_coding	3L	931	883	1063	1087	802	1092	853	930.434	805.715	959.459	1023.27	925.791	1099.65	883.648	946.853	-0.00339337	0.24624	-0.0137807	0.989005	1	0.0544115	0.246348	0.220873	0.825191	0.999669	0.0578049	0.185579	0.311484	0.755433	1	no	no	no	0
FBgn0012344	Dh44	Diuretic_hormone_44	protein_coding	3R	0	0	0	0	0	0	0	?	?	?	?	?	?	?	?	?	?	?	?	?	?	?	?	?	?	?	?	?	?	?	no	no	no	#VALUE!
FBgn0013263	Trl	Trithorax-like	protein_coding	3L	1074	961	996	1168	805	677	709	1073.35	876.888	898.985	1099.52	929.254	681.745	734.474	899.174	-0.129859	0.259654	-0.500122	0.616989	1	-0.404651	0.259984	-1.55645	0.119602	0.909928	-0.274792	0.197901	-1.38854	0.164974	1	no	no	no	0
FBgn0013269	FK506-bp1	FK506-binding_protein_1	protein_coding	3R	588	856	635	457	584	535	788	587.642	781.079	573.148	430.208	674.142	538.75	816.313	628.754	0.00248743	0.318506	0.00780968	0.993769	1	0.16657	0.318532	0.522931	0.601022	0.999669	0.164083	0.25438	0.645031	0.518907	1	no	no	no	0
FBgn0013272	Gp150	Gp150	protein_coding	2R	7630	7585	8162	9152	6291	6990	6389	7625.36	6921.12	7366.98	8615.45	7262.03	7038.99	6618.55	7349.78	0.00370544	0.172908	0.0214302	0.982903	1	-0.123679	0.172962	-0.715064	0.47457	0.999669	-0.127384	0.125919	-1.01164	0.31171	1	no	no	no	0
FBgn0013275	Hsp70Aa	Heat-shock-protein-70Aa	protein_coding	3R	0	0	0	0	0	0	0	?	?	?	?	?	?	?	?	?	?	?	?	?	?	?	?	?	?	?	?	?	?	?	no	no	no	#VALUE!
FBgn0013276	Hsp70Ab	Heat-shock-protein-70Ab	protein_coding	3R	0	0	0	0	0	0	0	?	?	?	?	?	?	?	?	?	?	?	?	?	?	?	?	?	?	?	?	?	?	?	no	no	no	#VALUE!
FBgn0013277	Hsp70Ba	Heat-shock-protein-70Ba	protein_coding	3R	0	0	0	0	0	0	0	?	?	?	?	?	?	?	?	?	?	?	?	?	?	?	?	?	?	?	?	?	?	?	no	no	no	#VALUE!
FBgn0013278	Hsp70Bb	Heat-shock-protein-70Bb	protein_coding	3R	4	15	0	33	15	1	0	3.99757	13.6871	0	31.0653	17.3153	1.00701	0	9.58176	0.138375	0.206723	0.669372	0.503258	1	-0.0257766	0.206458	-0.124852	0.900641	NA	-0.164151	0.262075	-0.626353	0.531083	NA	no	no	no	0
FBgn0013279	Hsp70Bc	Heat-shock-protein-70Bc	protein_coding	3R	13	8	0	33	39	19	52	12.9921	7.2998	0	31.0653	45.0197	19.1332	53.8683	24.1969	-0.114632	0.293742	-0.390247	0.696354	1	0.317305	0.293906	1.07961	0.280315	0.999669	0.431937	0.352319	1.22598	0.220206	1	no	no	no	0
FBgn0013300	Mst35Ba	Male-specific-transcript-35Ba	protein_coding	2L	0	0	0	0	0	0	0	?	?	?	?	?	?	?	?	?	?	?	?	?	?	?	?	?	?	?	?	?	?	?	no	no	no	#VALUE!
FBgn0013301	Mst35Bb	Male-specific-transcript-35Bb	protein_coding	2L	0	0	0	0	0	0	0	?	?	?	?	?	?	?	?	?	?	?	?	?	?	?	?	?	?	?	?	?	?	?	no	no	no	#VALUE!
FBgn0013303	Nca	Neurocalcin	protein_coding	3L	22	5	23	1	25	17	5	21.9866	4.56237	20.7597	0.941374	28.8588	17.1192	5.17965	14.2011	-0.222113	0.284723	-0.7801	0.435332	1	-0.00470752	0.284728	-0.0165334	0.986809	NA	0.217405	0.34377	0.632414	0.527117	NA	no	no	no	0
FBgn0013305	Nmda1	N-methyl-D-aspartate_receptor-associated_protein	protein_coding	2R	759	987	832	782	894	818	866	758.538	900.613	750.959	736.154	1031.99	823.733	897.115	842.729	0.0533269	0.249567	0.213678	0.830798	1	0.246177	0.249583	0.986353	0.32396	0.999669	0.19285	0.188202	1.0247	0.305506	1	no	no	no	0
FBgn0013307	Odc1	Ornithine_decarboxylase_1	protein_coding	2R	53	28	1	35	172	60	21	52.9678	25.5493	0.902595	32.9481	198.549	60.4205	21.7545	56.1559	-0.399187	0.333203	-1.19803	0.230904	1	0.354531	0.333446	1.06323	0.287675	0.999669	0.753719	0.382806	1.96893	0.0489612	1	no	no	no	0
FBgn0013308	Odc2	Ornithine_decarboxylase_2	protein_coding	2R	7	3	0	0	18	3	0	6.99574	2.73742	0	0	20.7783	3.02103	0	4.79036	-0.121963	0.169726	-0.718587	0.472396	1	0.0585966	0.169699	0.345297	0.729871	NA	0.180559	0.218422	0.826655	0.408432	NA	no	no	no	0
FBgn0013323	Ptth	Prothoracicotropic_hormone	protein_coding	2L	0	10	0	0	4	0	0	0	9.12475	0	0	4.61741	0	0	1.96317	0.0547347	0.122659	0.446235	0.655427	1	0.00825809	0.122471	0.0674287	0.94624	NA	-0.0464766	0.159972	-0.290529	0.771411	NA	no	no	no	0
FBgn0013325	RpL11	Ribosomal_protein_L11	protein_coding	2R	1676	1793	2299	1931	1302	1832	1881	1674.98	1636.07	2075.07	1817.79	1502.97	1844.84	1948.58	1785.76	0.125583	0.225125	0.557837	0.576956	1	0.0666491	0.225242	0.2959	0.767307	0.999669	-0.058934	0.167621	-0.351591	0.725145	1	no	no	no	0
FBgn0013334	Sap47	Synapse-associated_protein_47kD	protein_coding	3R	1724	2448	2460	2281	1766	1845	1854	1722.95	2233.74	2220.38	2147.27	2038.59	1857.93	1920.61	2020.21	0.334295	0.178443	1.8734	0.0610137	1	0.15662	0.178654	0.876664	0.380669	0.999669	-0.177675	0.129939	-1.36738	0.171507	1	no	no	no	0
FBgn0013342	nSyb	neuronal_Synaptobrevin	protein_coding	3L	40	35	18	66	27	29	174	39.9757	31.9366	16.2467	62.1307	31.1675	29.2033	180.252	55.8446	-0.138336	0.359643	-0.384648	0.700499	1	0.362446	0.359763	1.00746	0.313714	0.999669	0.500782	0.396405	1.26331	0.206478	1	no	no	no	0
FBgn0013343	Syx1A	Syntaxin_1A	protein_coding	3R	392	467	344	198	229	362	96	391.762	426.126	310.493	186.392	264.347	364.537	99.4493	291.872	-0.162247	0.387603	-0.41859	0.675516	1	-0.409911	0.387709	-1.05726	0.290391	0.999669	-0.247665	0.354463	-0.698703	0.484737	1	no	no	no	0
FBgn0013347	TfIIA-S	Transcription-factor-IIA-S	protein_coding	3R	3114	3925	4243	4029	3083	3502	4337	3112.11	3581.46	3829.71	3792.79	3558.87	3526.55	4492.83	3699.19	0.243042	0.192311	1.2638	0.206303	1	0.288975	0.192355	1.5023	0.13302	0.917137	0.0459329	0.140901	0.325994	0.744429	1	no	no	no	0
FBgn0013348	TpnC41C	Troponin_C_at_41C	protein_coding	2R	0	0	0	0	0	0	0	?	?	?	?	?	?	?	?	?	?	?	?	?	?	?	?	?	?	?	?	?	?	?	no	no	no	#VALUE!
FBgn0013432	bcn92	bcn92	protein_coding	X	438	500	682	596	495	550	582	437.734	456.237	615.57	561.059	571.404	553.855	602.911	542.681	0.259861	0.274338	0.947228	0.343523	1	0.335564	0.274466	1.22261	0.221478	0.979286	0.0757034	0.210042	0.36042	0.718533	1	no	no	no	0
FBgn0013433	beat-Ia	beaten_path_Ia	protein_coding	2L	0	0	5	0	0	0	0	0	0	4.51298	0	0	0	0	0.644711	0.0943099	0.117318	0.803885	0.421464	NA	0	0.116645	0	1	NA	-0.131592	0.152942	-0.860401	0.389568	NA	no	no	no	0
FBgn0013435	cdc2rk	cdc2-related-kinase	protein_coding	2R	277	228	190	248	155	359	179	276.832	208.044	171.493	233.461	178.925	361.516	185.431	230.815	-0.301283	0.368366	-0.817891	0.413419	1	-0.10511	0.368377	-0.285333	0.775389	0.999669	0.196173	0.317373	0.618115	0.5365	1	no	no	no	0
FBgn0013467	igl	igloo	protein_coding	2R	0	0	0	16	0	0	0	0	0	0	15.062	0	0	0	2.15171	0.104961	0.122824	0.854564	NA	NA	0	0.122577	0	NA	NA	-0.146771	0.160135	-0.916547	NA	NA	no	no	no	0
FBgn0013469	klu	klumpfuss	protein_coding	3L	55	121	487	76	69	57	141	54.9665	110.409	439.564	71.5444	79.6503	57.3995	146.066	137.086	0.756427	0.38675	1.95586	0.0504821	1	0.0900586	0.386693	0.232894	0.815844	0.999669	-0.666369	0.395102	-1.68658	0.091685	1	no	no	no	0
FBgn0013531	MED20	Mediator_complex_subunit_20	protein_coding	2L	311	491	503	483	304	715	365	310.811	448.025	454.005	454.684	350.923	720.011	378.114	445.225	0.376841	0.340925	1.10535	0.269009	1	0.45893	0.340996	1.34585	0.17835	0.949948	0.082089	0.279378	0.293827	0.76889	1	no	no	no	0
FBgn0013548	l(2)dtl	lethal-(2)-denticleless	protein_coding	2R	894	929	787	1051	714	786	1057	893.456	847.689	710.342	989.384	824.208	791.509	1094.98	878.795	-0.0656469	0.272984	-0.240479	0.809959	1	0.0174953	0.273062	0.0640707	0.948914	0.999669	0.0831422	0.209505	0.39685	0.691478	1	no	no	no	0
FBgn0013563	Pex1	Peroxin_1	protein_coding	3L	51	71	61	106	88	84	8	50.969	64.7857	55.0583	99.7856	101.583	84.5888	8.28744	66.4368	0.158571	0.369606	0.429026	0.667904	1	0.0728297	0.369513	0.197096	0.843752	0.999669	-0.0857412	0.398876	-0.214957	0.829801	1	no	no	no	0
FBgn0013576	mtd	mustard	protein_coding	3R	1151	1706	1593	1238	1438	1333	1386	1150.3	1556.68	1437.83	1165.42	1659.96	1342.34	1435.8	1392.62	0.236288	0.235228	1.00451	0.315134	1	0.32462	0.23529	1.37966	0.167692	0.947389	0.0883324	0.175825	0.502388	0.615394	1	no	no	no	0
FBgn0013672	mt:ATPase6	mitochondrial_ATPase_subunit_6	protein_coding	dmel_mitochondrion_genome	52851	73105	57005	14862	62286	65308	63491	52818.9	66706.5	51452.4	13990.7	71900	65765.7	65772.2	55486.6	-0.173763	0.392195	-0.443054	0.657727	1	0.219113	0.392195	0.558685	0.576377	0.999669	0.392877	0.385297	1.01967	0.307884	1	no	no	no	0
FBgn0013673	mt:ATPase8	mitochondrial_ATPase_subunit_8	protein_coding	dmel_mitochondrion_genome	1075	1828	744	491	867	1935	1297	1074.35	1668	671.531	462.214	1000.82	1948.56	1343.6	1167.01	-0.179071	0.369736	-0.484322	0.628157	1	0.314042	0.369702	0.849445	0.395633	0.999669	0.493113	0.319206	1.54481	0.122392	1	no	no	no	0
FBgn0013674	mt:CoI	mitochondrial_Cytochrome_c_oxidase_subunit_I	protein_coding	dmel_mitochondrion_genome	50889	59123	59520	41122	62020	66452	65786	50858	53948.3	53722.5	38711.2	71592.9	66917.8	68149.7	57700	-0.0653923	0.191939	-0.340694	0.733334	1	0.416174	0.191934	2.16831	0.0301348	0.581781	0.481566	0.140755	3.4213	0.000623222	0.181166	no	no	no	0
FBgn0013675	mt:CoII	mitochondrial_Cytochrome_c_oxidase_subunit_II	protein_coding	dmel_mitochondrion_genome	1059	1183	1041	361	996	1300	1213	1058.36	1079.46	939.601	339.836	1149.73	1309.11	1256.58	1018.95	-0.345396	0.349947	-0.986997	0.323644	1	0.20612	0.349874	0.589126	0.555777	0.999669	0.551516	0.291198	1.89395	0.0582313	1	no	no	no	0
FBgn0013676	mt:CoIII	mitochondrial_Cytochrome_c_oxidase_subunit_III	protein_coding	dmel_mitochondrion_genome	47237	57092	60593	44226	59231	63936	57914	47208.3	52095	54690.9	41633.2	68373.4	64384.1	59994.8	55482.8	0.0570201	0.177837	0.320631	0.74849	1	0.423874	0.177834	2.38354	0.017147	0.448074	0.366854	0.129688	2.82874	0.00467323	0.642187	no	no	no	0
FBgn0013678	mt:Cyt-b	mitochondrial_Cytochrome_b	protein_coding	dmel_mitochondrion_genome	6734	10122	6483	4640	10695	9471	9892	6729.9	9236.07	5851.52	4367.97	12345.8	9537.38	10247.4	8330.87	-0.0764867	0.277999	-0.275133	0.783214	1	0.591089	0.277972	2.12643	0.0334671	0.609713	0.667576	0.214056	3.1187	0.00181649	0.416031	no	no	no	0
FBgn0013679	mt:ND1	mitochondrial_NADH-ubiquinone_oxidoreductase_chain_1	protein_coding	dmel_mitochondrion_genome	34	38	30	8	20	14	8	33.9793	34.674	27.0779	7.53099	23.087	14.0981	8.28744	21.2478	-0.0875457	0.338984	-0.258259	0.796207	1	-0.301522	0.33851	-0.890734	0.373072	0.999669	-0.213977	0.385921	-0.554457	0.579266	1	no	no	no	0
FBgn0013680	mt:ND2	mitochondrial_NADH-ubiquinone_oxidoreductase_chain_2	protein_coding	dmel_mitochondrion_genome	76	201	44	23	196	41	109	75.9538	183.407	39.7142	21.6516	226.253	41.2874	112.916	100.169	-0.0393354	0.369116	-0.106567	0.915133	1	0.267257	0.369135	0.724009	0.46906	0.999669	0.306592	0.398806	0.768776	0.442026	1	no	no	no	0
FBgn0013681	mt:ND3	mitochondrial_NADH-ubiquinone_oxidoreductase_chain_3	protein_coding	dmel_mitochondrion_genome	164	396	466	219	344	539	312	163.9	361.34	420.609	206.161	397.097	542.778	323.21	345.014	0.622507	0.357094	1.74326	0.0812888	1	0.91857	0.357051	2.57266	0.0100922	0.32772	0.296063	0.2994	0.988855	0.322734	1	no	no	no	0
FBgn0013683	mt:ND4L	mitochondrial_NADH-ubiquinone_oxidoreductase_chain_4L	protein_coding	dmel_mitochondrion_genome	1	1	0	0	0	0	0	0.999392	0.912475	0	0	0	0	0	0.273124	-0.0252434	0.115139	-0.219242	0.826462	NA	-0.0529041	0.115139	-0.459478	0.645891	NA	-0.0276607	0.150485	-0.183811	0.854162	NA	no	no	no	0
FBgn0013684	mt:ND5	mitochondrial_NADH-ubiquinone_oxidoreductase_chain_5	protein_coding	dmel_mitochondrion_genome	33	18	25	23	6	14	5	32.9799	16.4245	22.5649	21.6516	6.92611	14.0981	5.17965	17.1178	-0.101172	0.339772	-0.297764	0.765884	1	-0.505489	0.338878	-1.49166	0.135789	0.918778	-0.404317	0.385966	-1.04755	0.294848	NA	no	no	no	0
FBgn0013685	mt:ND6	mitochondrial_NADH-ubiquinone_oxidoreductase_chain_6	protein_coding	dmel_mitochondrion_genome	27	124	43	30	42	46	50	26.9836	113.147	38.8116	28.2412	48.4828	46.3224	51.7965	50.5407	0.371972	0.38062	0.977281	0.32843	1	0.208423	0.380507	0.54775	0.583863	0.999669	-0.16355	0.398365	-0.410552	0.681401	1	no	no	no	0
FBgn0013686	mt:lrRNA	mitochondrial_large_ribosomal_RNA	rRNA	dmel_mitochondrion_genome	?	?	?	?	?	?	?	?	?	?	?	?	?	?	?	?	?	?	?	?	?	?	?	?	?	?	?	?	?	?	no	no	no	#VALUE!
FBgn0013688	mt:srRNA	mitochondrial_small_ribosomal_RNA	rRNA	dmel_mitochondrion_genome	?	?	?	?	?	?	?	?	?	?	?	?	?	?	?	?	?	?	?	?	?	?	?	?	?	?	?	?	?	?	no	no	no	#VALUE!
FBgn0013689	mt:tRNA:A	mitochondrial_alanine_tRNA	tRNA	dmel_mitochondrion_genome	?	?	?	?	?	?	?	?	?	?	?	?	?	?	?	?	?	?	?	?	?	?	?	?	?	?	?	?	?	?	no	no	no	#VALUE!
FBgn0013690	mt:tRNA:C	mitochondrial_cysteine_tRNA	tRNA	dmel_mitochondrion_genome	?	?	?	?	?	?	?	?	?	?	?	?	?	?	?	?	?	?	?	?	?	?	?	?	?	?	?	?	?	?	no	no	no	#VALUE!
FBgn0013691	mt:tRNA:D	mitochondrial_aspartic_acid_tRNA	tRNA	dmel_mitochondrion_genome	?	?	?	?	?	?	?	?	?	?	?	?	?	?	?	?	?	?	?	?	?	?	?	?	?	?	?	?	?	?	no	no	no	#VALUE!
FBgn0013692	mt:tRNA:E	mitochondrial_glutamic_acid_tRNA	tRNA	dmel_mitochondrion_genome	?	?	?	?	?	?	?	?	?	?	?	?	?	?	?	?	?	?	?	?	?	?	?	?	?	?	?	?	?	?	no	no	no	#VALUE!
FBgn0013693	mt:tRNA:F	mitochondrial_phenylalanine_tRNA	tRNA	dmel_mitochondrion_genome	?	?	?	?	?	?	?	?	?	?	?	?	?	?	?	?	?	?	?	?	?	?	?	?	?	?	?	?	?	?	no	no	no	#VALUE!
FBgn0013694	mt:tRNA:G	mitochondrial_glycine_tRNA	tRNA	dmel_mitochondrion_genome	?	?	?	?	?	?	?	?	?	?	?	?	?	?	?	?	?	?	?	?	?	?	?	?	?	?	?	?	?	?	no	no	no	#VALUE!
FBgn0013695	mt:tRNA:H	mitochondrial_histidine_tRNA	tRNA	dmel_mitochondrion_genome	?	?	?	?	?	?	?	?	?	?	?	?	?	?	?	?	?	?	?	?	?	?	?	?	?	?	?	?	?	?	no	no	no	#VALUE!
FBgn0013696	mt:tRNA:I	mitochondrial_isoleucine_tRNA	tRNA	dmel_mitochondrion_genome	?	?	?	?	?	?	?	?	?	?	?	?	?	?	?	?	?	?	?	?	?	?	?	?	?	?	?	?	?	?	no	no	no	#VALUE!
FBgn0013697	mt:tRNA:K	mitochondrial_lysine_tRNA	tRNA	dmel_mitochondrion_genome	?	?	?	?	?	?	?	?	?	?	?	?	?	?	?	?	?	?	?	?	?	?	?	?	?	?	?	?	?	?	no	no	no	#VALUE!
FBgn0013698	mt:tRNA:L:CUN	mitochondrial_leucine_CUN_tRNA	tRNA	dmel_mitochondrion_genome	?	?	?	?	?	?	?	?	?	?	?	?	?	?	?	?	?	?	?	?	?	?	?	?	?	?	?	?	?	?	no	no	no	#VALUE!
FBgn0013699	mt:tRNA:L:UUR	mitochondrial_leucine_UUR_tRNA	tRNA	dmel_mitochondrion_genome	?	?	?	?	?	?	?	?	?	?	?	?	?	?	?	?	?	?	?	?	?	?	?	?	?	?	?	?	?	?	no	no	no	#VALUE!
FBgn0013700	mt:tRNA:M	mitochondrial_methionine_tRNA	tRNA	dmel_mitochondrion_genome	?	?	?	?	?	?	?	?	?	?	?	?	?	?	?	?	?	?	?	?	?	?	?	?	?	?	?	?	?	?	no	no	no	#VALUE!
FBgn0013701	mt:tRNA:N	mitochondrial_asparagine_tRNA	tRNA	dmel_mitochondrion_genome	?	?	?	?	?	?	?	?	?	?	?	?	?	?	?	?	?	?	?	?	?	?	?	?	?	?	?	?	?	?	no	no	no	#VALUE!
FBgn0013702	mt:tRNA:P	mitochondrial_proline_tRNA	tRNA	dmel_mitochondrion_genome	?	?	?	?	?	?	?	?	?	?	?	?	?	?	?	?	?	?	?	?	?	?	?	?	?	?	?	?	?	?	no	no	no	#VALUE!
FBgn0013703	mt:tRNA:Q	mitochondrial_glutamine_tRNA	tRNA	dmel_mitochondrion_genome	?	?	?	?	?	?	?	?	?	?	?	?	?	?	?	?	?	?	?	?	?	?	?	?	?	?	?	?	?	?	no	no	no	#VALUE!
FBgn0013704	mt:tRNA:R	mitochondrial_arginine_tRNA	tRNA	dmel_mitochondrion_genome	?	?	?	?	?	?	?	?	?	?	?	?	?	?	?	?	?	?	?	?	?	?	?	?	?	?	?	?	?	?	no	no	no	#VALUE!
FBgn0013705	mt:tRNA:S:AGY	mitochondrial_serine_AGY_tRNA	tRNA	dmel_mitochondrion_genome	?	?	?	?	?	?	?	?	?	?	?	?	?	?	?	?	?	?	?	?	?	?	?	?	?	?	?	?	?	?	no	no	no	#VALUE!
FBgn0013706	mt:tRNA:S:UCN	mitochondrial_serine_UCN_tRNA	tRNA	dmel_mitochondrion_genome	?	?	?	?	?	?	?	?	?	?	?	?	?	?	?	?	?	?	?	?	?	?	?	?	?	?	?	?	?	?	no	no	no	#VALUE!
FBgn0013707	mt:tRNA:T	mitochondrial_threonine_tRNA	tRNA	dmel_mitochondrion_genome	?	?	?	?	?	?	?	?	?	?	?	?	?	?	?	?	?	?	?	?	?	?	?	?	?	?	?	?	?	?	no	no	no	#VALUE!
FBgn0013708	mt:tRNA:V	mitochondrial_valine_tRNA	tRNA	dmel_mitochondrion_genome	?	?	?	?	?	?	?	?	?	?	?	?	?	?	?	?	?	?	?	?	?	?	?	?	?	?	?	?	?	?	no	no	no	#VALUE!
FBgn0013709	mt:tRNA:W	mitochondrial_tryptophan_tRNA	tRNA	dmel_mitochondrion_genome	?	?	?	?	?	?	?	?	?	?	?	?	?	?	?	?	?	?	?	?	?	?	?	?	?	?	?	?	?	?	no	no	no	#VALUE!
FBgn0013710	mt:tRNA:Y	mitochondrial_tyrosine_tRNA	tRNA	dmel_mitochondrion_genome	?	?	?	?	?	?	?	?	?	?	?	?	?	?	?	?	?	?	?	?	?	?	?	?	?	?	?	?	?	?	no	no	no	#VALUE!
FBgn0013717	not	non-stop	protein_coding	3L	191	107	132	180	101	57	99	190.884	97.6348	119.143	169.447	116.59	57.3995	102.557	121.951	-0.27974	0.387296	-0.722289	0.470117	1	-0.627797	0.387624	-1.6196	0.105318	0.890098	-0.348057	0.354237	-0.982554	0.325827	1	no	no	no	0
FBgn0013718	nuf	nuclear_fallout	protein_coding	3L	999	1132	1145	608	1046	868	1020	998.392	1032.92	1033.47	572.355	1207.45	874.084	1056.65	967.904	-0.158243	0.304191	-0.520208	0.602919	1	0.0664896	0.304187	0.218582	0.826976	0.999669	0.224732	0.239582	0.938016	0.348236	1	no	no	no	0
FBgn0013720	pck	pickel	protein_coding	X	288	354	482	378	216	319	419	287.825	323.016	435.051	355.839	249.34	321.236	434.055	343.766	0.278387	0.334505	0.832235	0.405276	1	0.149635	0.33477	0.44698	0.65489	0.999669	-0.128751	0.272079	-0.473212	0.636062	1	no	no	no	0
FBgn0013725	phyl	phyllopod	protein_coding	2R	0	0	63	23	0	9	51	0	0	56.8635	21.6516	0	9.06308	52.8324	20.0587	0.154231	0.225858	0.682867	0.494691	1	0.0964886	0.225743	0.427426	0.669069	0.999669	-0.0577424	0.283766	-0.203486	0.838755	1	no	no	no	0
FBgn0013726	pnut	peanut	protein_coding	2R	3270	2748	2782	2517	1966	3117	2960	3268.01	2507.48	2511.02	2369.44	2269.46	3138.85	3066.35	2732.94	-0.376433	0.213236	-1.76534	0.0775073	1	-0.186349	0.213243	-0.873878	0.382184	0.999669	0.190084	0.15805	1.20268	0.229099	1	no	no	no	0
FBgn0013732	sced	scrambled	protein_coding	2R	784	804	691	844	569	510	727	783.523	733.63	623.693	794.519	656.826	513.575	753.121	694.127	-0.0996225	0.278406	-0.357831	0.720469	1	-0.248724	0.278672	-0.892532	0.372108	0.999669	-0.149101	0.214877	-0.693889	0.487752	1	no	no	no	0
FBgn0013733	shot	short_stop	protein_coding	2R	2193	2453	2498	2145	2301	2191	2129	2191.67	2238.3	2254.68	2019.25	2656.16	2206.36	2205.49	2253.13	-0.0152358	0.197065	-0.077314	0.938374	1	0.0986579	0.197107	0.50053	0.616702	0.999669	0.113894	0.144801	0.786556	0.431542	1	no	no	no	0
FBgn0013746	alien	alien	protein_coding	2L	299	417	366	481	414	397	300	298.818	380.502	330.35	452.801	477.902	399.783	310.779	378.705	0.284146	0.319973	0.888031	0.374524	1	0.310707	0.320131	0.970562	0.331767	0.999669	0.0265601	0.25549	0.103958	0.917203	1	no	no	no	0
FBgn0013749	Arf102F	ADP_ribosylation_factor_at_102F	protein_coding	4	38	55	73	79	31	68	50	37.9769	50.1861	65.8894	74.3685	35.7849	68.4766	51.7965	54.9256	0.326891	0.391704	0.834535	0.403979	1	0.145367	0.391752	0.371068	0.710587	0.999669	-0.181525	0.386259	-0.469956	0.638387	1	no	no	no	0
FBgn0013750	Arf51F	ADP_ribosylation_factor_at_51F	protein_coding	2R	457	353	366	308	378	267	343	456.722	322.104	330.35	289.943	436.345	268.871	355.324	351.38	-0.425123	0.319919	-1.32884	0.1839	1	-0.275576	0.319981	-0.861225	0.389114	0.999669	0.149547	0.25671	0.582551	0.560196	1	no	no	no	0
FBgn0013751	Awh	Arrowhead	protein_coding	3L	12	0	24	13	0	12	0	11.9927	0	21.6623	12.2379	0	12.0841	0	8.28242	0.0297395	0.188055	0.158143	0.874344	1	-0.100977	0.187843	-0.537561	0.59088	NA	-0.130716	0.240242	-0.544102	0.586371	NA	no	no	no	0
FBgn0013753	Bgb	Big_brother	protein_coding	3L	66	87	107	95	49	67	25	65.9599	79.3853	96.5777	89.4305	56.5633	67.4696	25.8982	68.7549	0.273647	0.392553	0.697096	0.485743	1	-0.255161	0.392701	-0.649758	0.515848	0.999669	-0.528807	0.382663	-1.38191	0.166998	1	no	no	no	0
FBgn0013755	Bro	Brother	protein_coding	3L	0	0	4	0	0	0	31	0	0	3.61038	0	0	0	32.1138	5.10346	-0.0309486	0.133269	-0.232227	NA	NA	0.106259	0.13324	0.797496	NA	NA	0.137207	0.173447	0.791062	NA	NA	no	no	no	0
FBgn0013756	Mtor	Megator	protein_coding	2R	1030	1306	1405	1406	1084	1123	1197	1029.37	1191.69	1268.15	1323.57	1251.32	1130.87	1240.01	1205	0.26933	0.207662	1.29696	0.194645	1	0.208774	0.207859	1.0044	0.315184	0.999669	-0.0605552	0.153001	-0.395783	0.692265	1	no	no	no	0
FBgn0013759	CASK	CASK_ortholog	protein_coding	3R	256	479	266	173	285	299	359	255.844	437.076	240.09	162.858	328.99	301.096	371.899	299.693	0.0599329	0.368927	0.162452	0.87095	1	0.264324	0.368931	0.716458	0.473709	0.999669	0.204391	0.317776	0.643192	0.5201	1	no	no	no	0
FBgn0013762	Cdk5	Cyclin-dependent_kinase_5	protein_coding	2R	50	40	48	119	43	69	55	49.9696	36.499	43.3246	112.023	49.6371	69.4836	56.9761	59.7019	0.142503	0.388071	0.367209	0.713463	1	0.0706075	0.388042	0.181958	0.855615	0.999669	-0.0718954	0.393847	-0.182546	0.855154	1	no	no	no	0
FBgn0013763	CG5210	?	protein_coding	2R	997	2938	1168	1059	5507	2487	3126	996.394	2680.85	1054.23	996.915	6357.02	2504.43	3238.32	2546.88	0.0707012	0.392298	0.180223	0.856978	1	0.94659	0.392296	2.41295	0.015824	0.440178	0.875889	0.384718	2.2767	0.0228039	1	no	no	no	0
FBgn0013764	Chi	Chip	protein_coding	2R	566	464	430	492	358	473	405	565.656	423.388	388.116	463.156	413.258	476.315	419.552	449.92	-0.347929	0.277182	-1.25524	0.209392	1	-0.312075	0.277388	-1.12505	0.260567	0.999669	0.0358538	0.214183	0.167398	0.867057	1	no	no	no	0
FBgn0013765	cnn	centrosomin	protein_coding	2R	1319	1420	1325	1133	919	1162	1524	1318.2	1295.71	1195.94	1066.58	1060.85	1170.14	1578.76	1240.88	-0.13537	0.255348	-0.530139	0.596016	1	-0.0428596	0.255408	-0.167809	0.866734	0.999669	0.09251	0.193662	0.477687	0.632873	1	no	no	no	0
FBgn0013767	Crz	Corazonin	protein_coding	3R	0	21	0	10	13	0	0	0	19.162	0	9.41374	15.0066	0	0	6.22604	0.0930161	0.159378	0.583619	0.559477	1	0.0180545	0.159235	0.113383	0.909727	NA	-0.0749617	0.20582	-0.364209	0.715702	NA	no	no	no	0
FBgn0013770	Cp1	Cysteine_proteinase-1	protein_coding	2R	1368	2193	1062	1441	1770	1705	1409	1367.17	2001.06	958.556	1356.52	2043.2	1716.95	1459.62	1557.58	0.0440799	0.301806	0.146054	0.883879	1	0.291551	0.301797	0.96605	0.334019	0.999669	0.247472	0.237031	1.04405	0.296464	1	no	no	no	0
FBgn0013771	Cyp6a9	Cytochrome_P450-6a9	protein_coding	2R	1	0	2	0	20	0	0	0.999392	0	1.80519	0	23.087	0	0	3.6988	-0.046748	0.137024	-0.341166	NA	NA	0.103649	0.136989	0.756619	NA	NA	0.150397	0.178163	0.844152	NA	NA	no	no	no	0
FBgn0013772	Cyp6a8	Cytochrome_P450-6a8	protein_coding	2R	8	19	0	32	156	0	21	7.99513	17.337	0	30.124	180.079	0	21.7545	36.7557	-0.073889	0.252576	-0.292542	0.769872	1	0.323581	0.252638	1.28081	0.20026	0.964429	0.39747	0.312489	1.27195	0.203391	1	no	no	no	0
FBgn0013773	Cyp6a22	Cyp6a22	protein_coding	2R	26	18	12	24	120	23	60	25.9842	16.4245	10.8311	22.593	138.522	23.1612	62.1558	42.8103	-0.359493	0.366504	-0.98087	0.326657	1	0.641658	0.366969	1.74854	0.0803711	0.832882	1.00115	0.398387	2.51301	0.0119706	1	no	no	no	0
FBgn0013799	Deaf1	Deformed_epidermal_autoregulatory_factor-1	protein_coding	3L	1728	2449	2111	1604	1498	1854	1997	1726.95	2234.65	1905.38	1509.96	1729.22	1866.99	2068.75	1863.13	0.11071	0.236869	0.467389	0.640222	1	0.11436	0.236948	0.482636	0.629354	0.999669	0.00364957	0.177479	0.0205634	0.983594	1	no	no	no	0
FBgn0013809	Dhc16F	Dynein_heavy_chain_at_16F	protein_coding	X	0	0	0	0	0	0	0	?	?	?	?	?	?	?	?	?	?	?	?	?	?	?	?	?	?	?	?	?	?	?	no	no	no	#VALUE!
FBgn0013810	Dhc36C	Dynein_heavy_chain_at_36C	protein_coding	2L	174	88	213	137	188	115	111	173.894	80.2978	192.253	128.968	217.018	115.806	114.988	146.175	-0.216165	0.388939	-0.555781	0.578361	1	-0.103954	0.388979	-0.267249	0.789277	0.999669	0.11221	0.35817	0.313288	0.754062	1	no	no	no	0
FBgn0013811	Dhc62B	Dynein_heavy_chain_at_62B	protein_coding	3L	8	13	18	34	27	31	48	7.99513	11.8622	16.2467	32.0067	31.1675	31.2173	49.7246	25.7457	0.132889	0.36092	0.368194	0.712729	1	0.555885	0.361105	1.5394	0.123707	0.909928	0.422996	0.397113	1.06518	0.286796	1	no	no	no	0
FBgn0013812	Dhc93AB	Dynein_heavy_chain_at_93AB	protein_coding	3R	0	1	1	7	0	10	0	0	0.912475	0.902595	6.58962	0	10.0701	0	2.63925	0.0335703	0.140258	0.239347	0.810837	1	0.0503785	0.140102	0.359585	0.719158	NA	0.0168081	0.182165	0.0922686	0.926485	NA	no	no	no	0
FBgn0013813	Dhc98D	Dynein_heavy_chain_at_89D	protein_coding	3R	27	22	3	59	24	64	23	26.9836	20.0744	2.70779	55.541	27.7045	64.4486	23.8264	31.6123	-0.0562077	0.331273	-0.169671	0.865268	1	0.145953	0.331265	0.440593	0.659508	0.999669	0.202161	0.381546	0.529846	0.596219	1	no	no	no	0
FBgn0013949	Ela	Elastin-like	protein_coding	3R	58	92	59	94	361	95	186	57.9647	83.9477	53.2531	88.4891	416.721	95.6659	192.683	141.246	-0.0541683	0.392729	-0.137928	0.890297	1	1.04234	0.392598	2.65497	0.00793144	0.2854	1.0965	0.379031	2.89291	0.00381687	0.600138	no	no	no	0
FBgn0013953	Esp	Epidermal_stripes_and_patches	protein_coding	3R	2	8	0	1	18	3	8	1.99878	7.2998	0	0.941374	20.7783	3.02103	8.28744	6.04668	-0.0622699	0.219946	-0.283114	0.777089	1	0.21125	0.220028	0.960104	0.337003	NA	0.27352	0.277408	0.985983	0.324141	NA	no	no	no	0
FBgn0013954	FK506-bp2	FK506-binding_protein_2	protein_coding	2R	7597	9373	9538	8991	7092	8311	8681	7592.38	8552.63	8608.95	8463.89	8186.67	8369.25	8992.91	8395.24	0.163405	0.14347	1.13895	0.254723	1	0.159181	0.143508	1.10922	0.267337	0.999669	-0.00422393	0.103407	-0.0408474	0.967418	1	no	no	no	0
FBgn0013972	Gycalpha99B	Guanylyl_cyclase_alpha-subunit_at_99B	protein_coding	3R	0	0	2	0	0	0	0	0	0	1.80519	0	0	0	0	0.257884	0.046841	0.115139	0.40682	0.68414	NA	0	0.115139	0	1	NA	-0.0631302	0.150485	-0.419513	0.674841	NA	no	no	no	0
FBgn0013973	Gycbeta100B	Guanylyl_cyclase_beta-subunit_at_100B	protein_coding	3R	4	7	0	0	0	0	0	3.99757	6.38732	0	0	0	0	0	1.48356	-0.00769469	0.121823	-0.063163	0.949637	1	-0.0962458	0.121534	-0.791922	0.428406	NA	-0.0885511	0.158725	-0.557891	0.576919	NA	no	no	no	0
FBgn0013981	His4r	Histone_H4_replacement	protein_coding	3R	1252	1357	1272	1262	845	1161	1107	1251.24	1238.23	1148.1	1188.01	975.428	1169.14	1146.77	1159.56	-0.0610527	0.216588	-0.281883	0.778033	1	-0.174676	0.216825	-0.805611	0.420467	0.999669	-0.113624	0.160889	-0.706224	0.480049	1	no	no	no	0
FBgn0013983	imd	immune_deficiency	protein_coding	2R	75	66	140	62	41	90	43	74.9544	60.2233	126.363	58.3652	47.3284	90.6308	44.545	71.7729	0.0955815	0.391573	0.244097	0.807156	1	-0.166149	0.391604	-0.424277	0.671364	0.999669	-0.26173	0.387715	-0.675058	0.499639	1	no	no	no	0
FBgn0013984	InR	Insulin-like_receptor	protein_coding	3R	1403	1067	1350	1227	845	1058	1319	1402.15	973.611	1218.5	1155.07	975.428	1065.42	1366.39	1165.22	-0.288242	0.250746	-1.14954	0.250335	1	-0.263913	0.250852	-1.05207	0.29277	0.999669	0.0243296	0.189857	0.128146	0.898033	1	no	no	no	0
FBgn0013987	MAPk-Ak2	MAP_kinase_activated_protein-kinase-2	protein_coding	X	553	557	518	403	455	479	551	552.664	508.249	467.544	379.374	525.23	482.357	570.797	498.031	-0.251201	0.282012	-0.890745	0.373066	1	-0.0493098	0.282024	-0.174843	0.861203	0.999669	0.201891	0.218167	0.925396	0.35476	1	no	no	no	0
FBgn0013995	Calx	Na/Ca-exchange_protein	protein_coding	3R	37	224	39	13	96	41	126	36.9775	204.394	35.2012	12.2379	110.818	41.2874	130.527	81.6348	0.219436	0.358039	0.612883	0.539954	1	0.294518	0.358001	0.822673	0.410694	0.999669	0.0750819	0.395832	0.189681	0.849559	1	no	no	no	0
FBgn0013997	Nrx-IV	Neurexin_IV	protein_coding	3L	333	201	266	169	171	181	138	332.797	183.407	240.09	159.092	197.394	182.269	142.958	205.43	-0.535679	0.35234	-1.52035	0.128424	1	-0.666113	0.352712	-1.88854	0.0589531	0.760763	-0.130434	0.295803	-0.440948	0.659251	1	no	no	no	0
FBgn0014000	Hf	Helical_Factor	protein_coding	2L	16	47	25	45	132	21	74	15.9903	42.8863	22.5649	42.3618	152.374	21.1472	76.6588	53.4263	0.0913381	0.371469	0.245884	0.805772	1	0.708811	0.371628	1.90731	0.0564798	0.746863	0.617473	0.39915	1.54697	0.12187	1	no	no	no	0
FBgn0014002	Pdi	Protein_disulfide_isomerase	protein_coding	3L	5080	4600	5711	5216	4552	4920	4621	5076.91	4197.38	5154.72	4910.21	5254.61	4954.48	4787.03	4905.05	-0.0903247	0.175913	-0.513463	0.607627	1	-0.0199065	0.175946	-0.11314	0.90992	0.999669	0.0704182	0.128241	0.54911	0.58293	1	no	no	no	0
FBgn0014006	Pk92B	Protein_kinase_at_92B	protein_coding	3R	703	703	721	669	506	837	754	702.572	641.47	650.771	629.779	584.102	842.867	781.091	690.379	-0.120928	0.268457	-0.450454	0.652383	1	0.065452	0.268479	0.243788	0.807395	0.999669	0.18638	0.205342	0.907657	0.36406	1	no	no	no	0
FBgn0014007	Ptp69D	Protein_tyrosine_phosphatase_69D	protein_coding	3L	1432	1292	1618	1448	1145	1379	1176	1431.13	1178.92	1460.4	1363.11	1321.73	1388.67	1218.25	1337.46	-0.0910914	0.216951	-0.419871	0.67458	1	-0.116774	0.2171	-0.537882	0.590658	0.999669	-0.0256829	0.161104	-0.159418	0.873339	1	no	no	no	0
FBgn0014009	Rab2	Rab2	protein_coding	2R	604	746	849	703	688	441	831	603.633	680.706	766.303	661.786	794.194	444.091	860.858	687.367	0.170759	0.313434	0.544799	0.585892	1	0.164518	0.313545	0.524701	0.599791	0.999669	-0.00624107	0.248939	-0.0250707	0.979999	1	no	no	no	0
FBgn0014010	Rab5	Rab5	protein_coding	2L	7015	7575	6997	6419	6146	6584	7621	7010.73	6912	6315.46	6042.68	7094.65	6630.15	7894.82	6842.93	-0.12183	0.16914	-0.720291	0.471346	1	0.0400959	0.169149	0.237045	0.812622	0.999669	0.161926	0.122985	1.31663	0.187962	1	no	no	no	0
FBgn0014011	Rac2	Rac2	protein_coding	3L	2155	2126	1934	1855	1280	2172	1608	2153.69	1939.92	1745.62	1746.25	1477.57	2187.22	1665.77	1845.15	-0.221604	0.235476	-0.941089	0.346659	1	-0.247058	0.235571	-1.04876	0.294287	0.999669	-0.0254544	0.176591	-0.144143	0.885387	1	no	no	no	0
FBgn0014018	Rel	Relish	protein_coding	3R	372	303	446	385	467	280	511	371.774	276.48	402.557	362.429	539.082	281.963	529.36	394.806	-0.0965844	0.344235	-0.280577	0.779035	1	0.222291	0.344172	0.645873	0.518362	0.999669	0.318876	0.28386	1.12335	0.261287	1	no	no	no	0
FBgn0014019	Rh5	Rhodopsin_5	protein_coding	2L	0	0	0	0	0	0	0	?	?	?	?	?	?	?	?	?	?	?	?	?	?	?	?	?	?	?	?	?	?	?	no	no	no	#VALUE!
FBgn0014020	Rho1	Rho1	protein_coding	2R	1865	2161	2040	1899	1727	1785	1831	1863.87	1971.86	1841.29	1787.67	1993.57	1797.51	1896.79	1878.94	0.00182313	0.186163	0.00979323	0.992186	1	0.0232535	0.186269	0.124838	0.900652	0.999669	0.0214304	0.136222	0.157319	0.874994	1	no	no	no	0
FBgn0014022	Rlb1	Rlb1	protein_coding	3R	70	118	160	161	73	41	29	69.9574	107.672	144.415	151.561	84.2677	41.2874	30.042	89.8861	0.583075	0.392615	1.4851	0.137516	1	-0.33366	0.39293	-0.849159	0.395793	0.999669	-0.916735	0.377068	-2.43122	0.0150481	1	no	no	no	0
FBgn0014023	mRpL47	mitochondrial_ribosomal_protein_L47	protein_coding	3R	127	132	160	136	102	101	242	126.923	120.447	144.415	128.027	117.744	101.708	250.695	141.423	-0.00127957	0.386936	-0.00330693	0.997361	1	0.189716	0.386947	0.49029	0.623929	0.999669	0.190996	0.352371	0.542029	0.587798	1	no	no	no	0
FBgn0014024	Rnp4F	RNA-binding_protein_4F	protein_coding	X	124	166	166	222	130	46	142	123.925	151.471	149.831	208.985	150.066	46.3224	147.102	139.672	0.284994	0.391346	0.728241	0.466466	1	-0.114428	0.391525	-0.292262	0.770086	0.999669	-0.399422	0.367076	-1.08812	0.276543	1	no	no	no	0
FBgn0014026	RpL7A	Ribosomal_protein_L7A	protein_coding	X	16198	16922	18619	18916	15008	18296	20105	16188.1	15440.9	16805.4	17807	17324.5	18424.2	20827.4	17545.4	0.038775	0.163828	0.236682	0.812903	1	0.211523	0.16383	1.29111	0.196666	0.962534	0.172748	0.118871	1.45324	0.146158	1	no	no	no	0
FBgn0014028	SdhB	Succinate_dehydrogenase_B	protein_coding	2R	1481	1859	1824	1558	1357	1475	1852	1480.1	1696.29	1646.33	1466.66	1566.46	1485.34	1918.54	1608.53	0.102773	0.219998	0.467151	0.640392	1	0.14822	0.220082	0.673476	0.500644	0.999669	0.0454472	0.163303	0.278299	0.780783	1	no	no	no	0
FBgn0014029	Sep2	Septin_2	protein_coding	3R	1065	735	1029	1937	588	768	732	1064.35	670.669	928.77	1823.44	678.759	773.383	758.301	956.811	0.11502	0.340163	0.338133	0.735263	1	-0.425109	0.340369	-1.24897	0.211678	0.973953	-0.54013	0.279282	-1.934	0.0531137	1	no	no	no	0
FBgn0014031	Spat	Serine_pyruvate_aminotransferase	protein_coding	X	37	89	20	83	302	28	318	36.9775	81.2103	18.0519	78.134	348.614	28.1963	329.426	131.516	-0.104281	0.372947	-0.279613	0.779775	1	0.906985	0.373086	2.43104	0.0150557	0.421976	1.01127	0.399215	2.53314	0.0113047	1	no	no	no	0
FBgn0014032	Sptr	Sepiapterin_reductase	protein_coding	X	15	21	47	21	35	0	0	14.9909	19.162	42.422	19.7688	40.4023	0	0	19.5351	0.120732	0.244454	0.493883	0.621389	1	-0.0579711	0.244238	-0.237355	0.812381	0.999669	-0.178703	0.303786	-0.588254	0.556362	1	no	no	no	0
FBgn0014033	Sr-CI	Scavenger_receptor_class_C,_type_I	protein_coding	2L	380	1190	437	219	1088	558	907	379.769	1085.85	394.434	206.161	1255.94	561.911	939.588	689.092	0.207145	0.387775	0.534188	0.593212	1	0.729981	0.387746	1.88262	0.0597512	0.76523	0.522837	0.35456	1.47461	0.140319	1	no	no	no	0
FBgn0014037	Su(Tpl)	Su(Tpl)	protein_coding	3L	620	695	602	555	648	602	529	619.623	634.17	543.362	522.462	748.02	606.219	548.007	603.123	-0.114922	0.275728	-0.416795	0.676828	1	0.0344059	0.275783	0.124757	0.900716	0.999669	0.149328	0.212067	0.704155	0.481336	1	no	no	no	0
FBgn0014073	Tie	Tie-like_receptor_tyrosine_kinase	protein_coding	3L	52	159	87	28	3	22	24	51.9684	145.084	78.5258	26.3585	3.46306	22.1542	24.8623	50.3451	0.396263	0.359979	1.10079	0.270986	1	-0.558242	0.359348	-1.55348	0.120308	0.909928	-0.954505	0.396247	-2.40886	0.0160024	1	no	no	no	0
FBgn0014075	Ugt	UDP-glucose-glycoprotein_glucosyltransferase	protein_coding	3L	997	844	844	832	677	780	624	996.394	770.129	761.79	783.223	781.496	785.467	646.42	789.274	-0.324547	0.238475	-1.36092	0.173537	1	-0.385957	0.238727	-1.61673	0.105937	0.890421	-0.0614102	0.179652	-0.341828	0.73248	1	no	no	no	0
FBgn0014076	Vm32E	Vitelline_membrane_32E	protein_coding	2L	3	9	5	5	10	15	0	2.99818	8.21227	4.51298	4.70687	11.5435	15.1051	0	6.72556	0.0202947	0.233344	0.0869733	0.930693	1	0.123792	0.233191	0.530863	0.595514	NA	0.103498	0.292066	0.354363	0.723066	NA	no	no	no	0
FBgn0014092	CG4278	?	protein_coding	2L	78	104	103	142	46	124	72	77.9526	94.8974	92.9673	133.675	53.1002	124.869	74.5869	93.1498	0.257583	0.391764	0.657497	0.510861	1	0.0170868	0.39194	0.0435954	0.965227	0.999669	-0.240497	0.369208	-0.651386	0.514797	1	no	no	no	0
FBgn0014127	barr	barren	protein_coding	2L	859	714	695	753	569	725	641	858.478	651.507	627.304	708.854	656.826	730.082	664.031	699.583	-0.331578	0.240622	-1.378	0.168202	1	-0.28858	0.240794	-1.19845	0.230742	0.985812	0.0429983	0.181428	0.236999	0.812658	1	no	no	no	0
FBgn0014133	bif	bifocal	protein_coding	X	2682	2946	2794	2794	1882	2408	1945	2680.37	2688.15	2521.85	2630.2	2172.49	2424.88	2014.88	2447.55	-0.0295761	0.185072	-0.159809	0.873031	1	-0.267927	0.18527	-1.44614	0.148137	0.932181	-0.238351	0.13557	-1.75815	0.0787225	1	no	no	no	0
FBgn0014135	bnl	branchless	protein_coding	3R	479	86	231	286	147	187	64	478.709	78.4728	208.499	269.233	169.69	188.311	66.2995	208.459	-0.697844	0.3921	-1.77976	0.0751152	1	-0.957148	0.392193	-2.4405	0.0146669	0.421593	-0.259304	0.370534	-0.699811	0.484045	1	no	no	no	0
FBgn0014141	cher	cheerio	protein_coding	3R	1731	1309	1104	1542	1750	1004	1050	1729.95	1194.43	996.465	1451.6	2020.12	1011.04	1087.73	1355.9	-0.409621	0.312395	-1.31123	0.189781	1	-0.251971	0.312411	-0.806539	0.419932	0.999669	0.15765	0.248194	0.635186	0.525307	1	no	no	no	0
FBgn0014143	croc	crocodile	protein_coding	3L	1456	1421	1416	1651	1111	1595	1029	1455.11	1296.63	1278.07	1554.21	1282.49	1606.18	1065.97	1362.67	-0.067645	0.252688	-0.267702	0.788929	1	-0.125883	0.252813	-0.49793	0.618533	0.999669	-0.0582381	0.191356	-0.304344	0.760865	1	no	no	no	0
FBgn0014163	fax	failed_axon_connections	protein_coding	3L	16559	13224	14794	11245	10014	13754	10292	16548.9	12066.6	13353	10585.7	11559.7	13850.4	10661.8	12660.9	-0.430525	0.191835	-2.24425	0.0248166	0.987973	-0.427931	0.191852	-2.23052	0.0257129	0.539345	0.00259384	0.140755	0.018428	0.985297	1	no	no	no	0
FBgn0014179	gcm	glial_cells_missing	protein_coding	2L	19	0	0	13	0	0	0	18.9884	0	0	12.2379	0	0	0	4.4609	-0.0856867	0.135086	-0.63431	0.525878	1	-0.158655	0.134958	-1.17558	0.239761	NA	-0.0729682	0.17555	-0.415656	0.677662	NA	no	no	no	0
FBgn0014184	Oda	Ornithine_decarboxylase_antizyme	protein_coding	2R	1541	1640	1739	1743	1656	1565	1658	1540.06	1496.46	1569.61	1640.81	1911.61	1575.97	1717.57	1636.01	0.0214042	0.202347	0.105779	0.915757	1	0.161126	0.202389	0.796122	0.425961	0.999669	0.139722	0.148946	0.938075	0.348206	1	no	no	no	0
FBgn0014189	Hel25E	Helicase_at_25E	protein_coding	2L	3554	3401	3290	3113	2282	3546	2774	3551.84	3103.33	2969.54	2930.5	2634.23	3570.85	2873.67	3090.56	-0.223776	0.202717	-1.10388	0.269644	1	-0.212001	0.202778	-1.04548	0.295801	0.999669	0.0117747	0.149512	0.0787545	0.937228	1	no	no	no	0
FBgn0014269	prod	proliferation_disrupter	protein_coding	2R	172	154	207	178	190	75	194	171.895	140.521	186.837	167.565	219.327	75.5257	200.97	166.092	-0.0325274	0.386714	-0.0841125	0.932967	1	-0.0312987	0.386803	-0.0809165	0.935508	0.999669	0.00122872	0.352012	0.00349057	0.997215	1	no	no	no	0
FBgn0014340	mof	males_absent_on_the_first	protein_coding	X	178	265	373	230	142	269	258	177.892	241.806	336.668	216.516	163.918	270.885	267.27	239.279	0.395639	0.358181	1.10458	0.269343	1	0.247272	0.358453	0.68983	0.490301	0.999669	-0.148367	0.301747	-0.491693	0.622937	1	no	no	no	0
FBgn0014342	mia	meiosis_I_arrest	protein_coding	3R	105	102	183	161	54	143	63	104.936	93.0724	165.175	151.561	62.335	144.002	65.2636	112.335	0.247519	0.391737	0.63185	0.527485	1	-0.161849	0.391945	-0.412938	0.679652	0.999669	-0.409368	0.369076	-1.10917	0.267357	1	no	no	no	0
FBgn0014343	mirr	mirror	protein_coding	3L	10418	13367	10219	11201	7811	10556	10922	10411.7	12197.1	9223.62	10544.3	9016.65	10630	11314.4	10476.8	0.0317967	0.194877	0.163163	0.87039	1	-0.0126644	0.194901	-0.0649787	0.948191	0.999669	-0.0444611	0.143101	-0.310698	0.75603	1	no	no	no	0
FBgn0014366	noi	noisette	protein_coding	3R	300	260	360	386	266	272	329	299.818	237.243	324.934	363.37	307.058	273.906	340.821	306.736	0.0312421	0.326823	0.0955935	0.923843	1	0.0261194	0.327036	0.0798671	0.936343	0.999669	-0.0051227	0.263626	-0.0194317	0.984497	1	no	no	no	0
FBgn0014368	nol	no_optic_lobe	protein_coding	3L	18	14	22	14	8	29	11	17.9891	12.7746	19.8571	13.1792	9.23482	29.2033	11.3952	16.2333	-0.0556925	0.331862	-0.167818	0.866726	1	-0.0122771	0.33163	-0.0370205	0.970469	0.999669	0.0434154	0.381756	0.113725	0.909456	NA	no	no	no	0
FBgn0014380	RhoL	Rho-like	protein_coding	3R	275	96	140	101	126	203	159	274.833	87.5976	126.363	95.0787	145.448	204.423	164.713	156.922	-0.992402	0.365818	-2.71283	0.0066711	0.478427	-0.402904	0.365394	-1.10266	0.270176	0.999669	0.589498	0.314327	1.87543	0.0607339	1	no	no	no	0
FBgn0014388	sty	sprouty	protein_coding	3L	2908	3177	3028	2406	2224	2341	2145	2906.23	2898.93	2733.06	2264.95	2567.28	2357.41	2222.07	2564.27	-0.128247	0.201753	-0.635664	0.524995	1	-0.267195	0.201884	-1.32351	0.185666	0.950765	-0.138948	0.148785	-0.933886	0.350363	1	no	no	no	0
FBgn0014391	sun	stunted	protein_coding	X	399	349	441	436	242	665	403	398.757	318.454	398.044	410.439	279.353	669.661	417.48	413.17	-0.0801438	0.351822	-0.227796	0.819805	1	0.153805	0.351812	0.43718	0.661981	0.999669	0.233949	0.293581	0.796882	0.42552	1	no	no	no	0
FBgn0014395	tilB	touch_insensitive_larva_B	protein_coding	X	1	9	7	0	0	4	25	0.999392	8.21227	6.31817	0	0	4.02804	25.8982	6.49373	0.0121653	0.197706	0.061532	0.950936	1	0.139532	0.197628	0.706031	0.480169	NA	0.127367	0.251825	0.505774	0.613016	NA	no	no	no	0
FBgn0014396	tim	timeless	protein_coding	2L	0	19	0	11	43	35	0	0	17.337	0	10.3551	49.6371	35.2453	0	16.0821	-0.00328146	0.225562	-0.0145479	0.988393	1	0.253302	0.225586	1.12286	0.261496	0.999669	0.256583	0.283551	0.904894	0.365522	NA	no	no	no	0
FBgn0014411	Vps26	Vacuolar_protein_sorting_26	protein_coding	X	1299	1569	1524	1389	1230	1463	1379	1298.21	1431.67	1375.55	1307.57	1419.85	1473.25	1428.55	1390.67	0.0720283	0.194472	0.370379	0.7111	1	0.140472	0.194573	0.721948	0.470326	0.999669	0.0684433	0.142625	0.479884	0.63131	1	no	no	no	0
FBgn0014417	CG13397	?	protein_coding	2L	73	74	42	58	35	131	20	72.9556	67.5231	37.909	54.5997	40.4023	131.918	20.7186	60.8609	-0.168788	0.376521	-0.448283	0.653949	1	-0.0319426	0.376497	-0.0848416	0.932387	0.999669	0.136845	0.399176	0.342819	0.731735	1	no	no	no	0
FBgn0014427	CG11899	?	protein_coding	3R	525	475	597	815	330	389	457	524.681	433.426	538.849	767.22	380.936	391.727	473.42	501.465	0.139132	0.316491	0.439608	0.660221	1	-0.287361	0.316935	-0.90669	0.364571	0.999669	-0.426493	0.252718	-1.68763	0.0914829	1	no	no	no	0
FBgn0014454	Acp1	Adult_cuticle_protein_1	protein_coding	2L	0	0	0	0	0	0	0	?	?	?	?	?	?	?	?	?	?	?	?	?	?	?	?	?	?	?	?	?	?	?	no	no	no	#VALUE!
FBgn0014455	Ahcy13	Adenosylhomocysteinase_at_13	protein_coding	X	2954	3154	2996	3006	2360	3056	2775	2952.2	2877.95	2704.17	2829.77	2724.27	3077.42	2874.7	2862.93	-0.0708661	0.170812	-0.414878	0.678231	1	-0.0271801	0.170882	-0.159058	0.873623	0.999669	0.0436859	0.12432	0.351399	0.725289	1	no	no	no	0
FBgn0014464	Cp7Fa	Chorion_protein_a_at_7F	protein_coding	X	2	1	1	0	4	4	1	1.99878	0.912475	0.902595	0	4.61741	4.02804	1.03593	1.92789	-0.0838478	0.166849	-0.502536	0.615291	1	0.0753463	0.166747	0.45186	0.65137	NA	0.159194	0.214942	0.740636	0.458914	NA	no	no	no	0
FBgn0014465	Cp7Fb	Chorion_protein_b_at_7F	protein_coding	X	6	4	5	3	11	10	0	5.99635	3.6499	4.51298	2.82412	12.6979	10.0701	0	5.67876	-0.0821681	0.22439	-0.366184	0.714228	1	0.0656231	0.224292	0.292579	0.769844	NA	0.147791	0.282062	0.523967	0.600302	NA	no	no	no	0
FBgn0014466	Cp7Fc	Chorion_protein_c_at_7F	protein_coding	X	12	11	6	3	20	21	1	11.9927	10.0372	5.41557	2.82412	23.087	21.1472	1.03593	10.7914	-0.167902	0.27425	-0.612223	0.54039	1	0.113528	0.274344	0.413814	0.67901	NA	0.28143	0.334082	0.842397	0.399566	NA	no	no	no	0
FBgn0014469	Cyp4e2	Cytochrome_P450-4e2	protein_coding	2R	1181	1624	1936	1373	3806	1563	1896	1180.28	1481.86	1747.42	1292.51	4393.46	1573.96	1964.12	1947.66	0.194301	0.336975	0.576605	0.564206	1	0.895193	0.336909	2.65708	0.00788218	0.2854	0.700892	0.275	2.5487	0.0108125	1	no	no	no	0
FBgn0014848	Eig71Eh	Eig71Eh	protein_coding	3L	0	0	0	0	0	0	0	?	?	?	?	?	?	?	?	?	?	?	?	?	?	?	?	?	?	?	?	?	?	?	no	no	no	#VALUE!
[truncated: 15,960 more rows]
