# Supplementary material for: Nucleoporin107 mediates female sexual differentiation via Dsx
Source: eLife. 2022 Mar 21;11:e72632. doi: 10.7554/eLife.72632 (PMC8975549; doi:10.7554/eLife.72632)
Supplement: Supplementary file 2. [file elife-72632-supp2.xlsx]

## Sheet: Sheet1
README
Column Heading	Description
Gene Name	Flybase Gene Name
FlyBase_ID	Flybase ID given as FBgnXXXXXXX
Differential Expression	Change in expression observed in Nup107 mutants (Increase/Decrease)
Pathway Involvement/Function	developmental processes or signalling pathways gene is involved in
Yellow Highlight	Identified as Dsx target gene
Table S2
Gene Name	FlyBase_ID	Differential Expression	Pathway Involvement
ap	FBgn0000099	increase	transcription factor, EGFR target gene
br	FBgn0000210	decrease	transcription factor, dpp target gene
Cg25C	FBgn0000299	increase	collagenIVa, ECM organization, regulator of BMP signalling, oviduct morphogenesis
dec-1	FBgn0000427	decrease	sex-linked, female sterile, eggshell chorion assembly
dsx	FBgn0000504	decrease	sex determination gene
ec	FBgn0000542	decrease	a protein phosphatase 1 (PP1) binding protein
GstD1	FBgn0001149	increase	Glutathione S-transferase
ovo	FBgn0003028	increase	sex-specific female sterility, germline specific transcription factor, epidermis differentiation under Wingless and EGFR
Pkc53E	FBgn0003091	decrease	dual specifity protein serine/threonine kinase
sd	FBgn0003345	decrease	transcription factor, Hippo and Wingless signalling
RpL40	FBgn0003941	increase	ribosome constituent
RpS14b	FBgn0004404	increase	ribosome constituent
ex	FBgn0004583	decrease	regulates hippo signaling; inhibitor of growth
Cyp4d1	FBgn0005670	increase	Cytochrome P450-4d1
tutl	FBgn0010473	increase	an Ig-superfamily transmembrane protein
Aldh	FBgn0012036	increase	Aldehyde dehydrogenase
Cyp6g1	FBgn0025454	increase	Cytochrome P450 superfamily
Mgstl	FBgn0025814	increase	Microsomal glutathione S-transferase-like
ana2	FBgn0027513	decrease	essential for centriole assembly
LM408	FBgn0027611	increase	Lysosomal α-mannosidase II
He	FBgn0028430	increase	unknown function
prc	FBgn0028573	increase	type IV collagen-like extracellular matrix protein
CG9691	FBgn0030160	increase	unknown function
Cpr11A	FBgn0030394	increase	predicted involvement in chitin-based cuticle development
CG9095	FBgn0030617	decrease	predicted carbohydrate binding activity
CG4829	FBgn0030796	increase	predicted gluthione hydrolase and peptidlytransferase activity
CG8568	FBgn0030841	decrease	unknown function
Muc18B	FBgn0031000	decrease	predicted to have extracellular matrix structural constituent
MFS3	FBgn0031307	increase	predicted involvement in transmembrane transport
IM33	FBgn0031561	increase	small secreted peptides released in the hemolymph
Cyp28d1	FBgn0031689	increase	predicted heme binding and oxidatrion-reduction activity
CG5973	FBgn0031914	increase	predicted, cytosolic transport alpha tocopherol transfer protein
CG6739	FBgn0031926	decrease	unknown function, LDL receptor-like superfamily
CG13795	FBgn0031937	increase	unknown function, predicted sodium symporter activity
CG5390	FBgn0032213	increase	unknown, predicted serine-type endopeptidase, localizes to the extracellular region.
CG10283	FBgn0032681	decrease	unknown function, predicted to have ubiquitin protein ligase binding activity.
scaf	FBgn0033033	increase	negative regulation of BMP signaling pathway
CCHa2-R	FBgn0033058	increase	Bombesin receptor-like; G protein-coupled receptor
Prx2540-2	FBgn0033518	increase	peroxidase involved in hydrogen peroxide catabolism
ZnT49B	FBgn0033762	increase	Zinc transporter 49B, transmembrane protein
hui	FBgn0033968	increase	unknown function, Hh signaling target
GstE11	FBgn0034354	increase	Glutathione transferase
CG15098	FBgn0034398	increase	unknown function
CG15829	FBgn0035743	decrease	Acyl-CoA binding protein 6
CG3967	FBgn0035989	decrease	α-tubulin acetylase
CG5830	FBgn0036556	decrease	serine/threonine phosphatase, female semi sterile nos-Gal4-RNAi-KD
CG12974	FBgn0037065	decrease	unknown function
CG8301	FBgn0037717	increase	unknown biological function- Zinc finger C2H2 transcription factor
CG14687	FBgn0037835	decrease	predicted calmodulin binding activity
AdamTS-A	FBgn0038341	decrease	a secreted matrix metalloprotease, fertility, ECM organization
CG5399	FBgn0038353	decrease	unknown function
Irc	FBgn0038465	increase	extracellular catalase
CG6040	FBgn0038679	decrease	unknown function
plum	FBgn0039431	decrease	Ig-superfamily transmembrane protein, facilitates TGF-b (babo) signalling to regulate axon pruning
CG14629	FBgn0040398	increase	unknown function
CG3348	FBgn0040609	increase	chitin binding activity
Nplp2	FBgn0040813	increase	neuropeptide signaling pathway
Tep4	FBgn0041180	increase	endopeptidase inhibitor activity
vir-1	FBgn0043841	increase	virus-induced RNA 1, unknown function
CG32276	FBgn0047135	increase	unknown function
CG31288	FBgn0051288	increase	unknown function
CG31676	FBgn0051676	increase	unknown function
CR33294	FBgn0053294	decrease	unknown function
Frq2	FBgn0083228	decrease	calcium ion binding, chemical synaptic transmission
CG34216	FBgn0085245	increase	unknown function
CG34370	FBgn0085399	decrease	unknown function
Lgr4	FBgn0085440	decrease	G protein coupled receptor signalling pathway
stl	FBgn0086408	increase	Predicted metalloendopeptidase and zinc ion binding activity, involved in negative regulation of ovarian follicle development, female sterile
Jabba	FBgn0259682	increase	unknown biological function, lipid droplet protein
CG42404	FBgn0259823	increase	unknown function
NimC1	FBgn0259896	increase	secreted or integral plasma membrane protein containing EGF-like domain
Bet5	FBgn0260860	increase	predicted to have Rab guanyl-nucleotide exchange factor activity; ER to Golgi transport
rgn	FBgn0261258	decrease	Predicted to have DNA N-glycosylase activity, involved in tissue regeneration
pdm3	FBgn0261588	decrease	a POU domain transcription factor
RpS26	FBgn0261597	increase	ribosomal protein
CG42711	FBgn0261628	increase	unknown function
bru-2	FBgn0262475	decrease	RNA binding protein, regulates splicing and translation.
CG43349	FBgn0263081	decrease	unknown function
Ent2	FBgn0263916	decrease	nucleoside transmembrane transporter activity
cpo	FBgn0263995	decrease	mRNA binding activity
Piezo	FBgn0264953	increase	mechanosensitive ion channel activity
CG45095	FBgn0266534	increase	unknown function
